# Supplementary material for: Transcriptome Analysis of Human Dermal Cells Infected with Candida auris Identified Unique Pathogenesis/Defensive Mechanisms Particularly Ferroptosis
Source: Springer Nature journal article supplement (doi:10.1007/s11046-024-00868-9), 2024-07-11
Supplement: MOESM1 [file 11046_2024_868_MOESM1_ESM.xlsx]

## Sheet: Control
gene_id	gene_name	gene_chr	gene_start	gene_end	gene_strand	gene_length	gene_biotype	gene_description	tf_family
ENSG00000198744	MTCO3P12	1	634376	634922	+	547	unprocessed_pseudogene	MT-CO3 pseudogene 12 [Source:HGNC Symbol;Acc:HGNC:52042]	-
ENSG00000186603	HPDL	1	45326905	45328533	+	1629	protein_coding	4-hydroxyphenylpyruvate dioxygenase like [Source:HGNC Symbol;Acc:HGNC:28242]	-
ENSG00000171357	LURAP1	1	46203334	46221261	+	1854	protein_coding	leucine rich adaptor protein 1 [Source:HGNC Symbol;Acc:HGNC:32327]	-
ENSG00000196369	SRGAP2B	1	144887265	145095528	-	7230	protein_coding	SLIT-ROBO Rho GTPase activating protein 2B [Source:HGNC Symbol;Acc:HGNC:35237]	-
ENSG00000223612	AC241585.1	1	145233001	145233519	+	519	processed_pseudogene	EGFR-coamplified and overexpressed protein (ECOP) pseudogene	-
ENSG00000188092	GPR89B	1	147928393	147993521	+	5143	protein_coding	G protein-coupled receptor 89B [Source:HGNC Symbol;Acc:HGNC:13840]	-
ENSG00000272574	AL596325.2	1	162593103	162593754	+	505	sense_intronic	novel transcript, sense intronic to UAP1	-
ENSG00000277681	MIR6739	1	201863373	201863447	+	75	miRNA	microRNA 6739 [Source:HGNC Symbol;Acc:HGNC:50165]	-
ENSG00000231563	AL670729.1	1	228407381	228409694	+	283	antisense	novel transcript	-
ENSG00000227934	AL732414.1	1	231021611	231022183	+	573	processed_pseudogene	ring finger protein 4 (RNF4) pseudogene	-
ENSG00000237991	RPL35P1	1	236981339	236981708	+	370	processed_pseudogene	ribosomal protein L35 pseudogene 1 [Source:HGNC Symbol;Acc:HGNC:36695]	-
ENSG00000273305	AC009237.15	2	95537969	95538469	+	501	lincRNA	novel transcript	-
ENSG00000231822	AC019097.1	2	99102018	99102752	+	735	processed_pseudogene	structural maintenance of chromosomes 3 (SMC3) pseudogene	-
ENSG00000182263	FIGN	2	163593396	163736012	-	9942	protein_coding	fidgetin, microtubule severing factor [Source:HGNC Symbol;Acc:HGNC:13285]	-
ENSG00000189362	NEMP2	2	190504342	190534722	-	6521	protein_coding	nuclear envelope integral membrane protein 2 [Source:HGNC Symbol;Acc:HGNC:33700]	-
ENSG00000252916	RNU6-762P	2	200899020	200899121	+	102	snRNA	RNA, U6 small nuclear 762, pseudogene [Source:HGNC Symbol;Acc:HGNC:47725]	-
ENSG00000206728	RF00019	3	23273807	23273910	+	104	misc_RNA		-
ENSG00000275334	MIR5787	3	50227436	50227490	+	55	miRNA	microRNA 5787 [Source:HGNC Symbol;Acc:HGNC:49930]	-
ENSG00000180376	CCDC66	3	56557161	56621818	+	9267	protein_coding	coiled-coil domain containing 66 [Source:HGNC Symbol;Acc:HGNC:27709]	-
ENSG00000277723	MIR6827	3	134367804	134367862	-	59	miRNA	microRNA 6827 [Source:HGNC Symbol;Acc:HGNC:50234]	-
ENSG00000241627	UBQLN4P1	3	148985868	148987668	-	1801	processed_pseudogene	ubiquilin 4 pseudogene 1 [Source:HGNC Symbol;Acc:HGNC:31133]	-
ENSG00000201217	RF00019	3	152449272	152449384	+	113	misc_RNA		-
ENSG00000214192	UBE2V1P2	3	175718231	175718670	-	440	processed_pseudogene	ubiquitin conjugating enzyme E2 V1 pseudogene 2 [Source:HGNC Symbol;Acc:HGNC:32648]	-
ENSG00000213139	CRYGS	3	186538441	186546702	-	2151	protein_coding	crystallin gamma S [Source:HGNC Symbol;Acc:HGNC:2417]	-
ENSG00000239122	RNU2-11P	3	195928589	195928775	-	187	snRNA	RNA, U2 small nuclear 11, pseudogene [Source:HGNC Symbol;Acc:HGNC:48504]	-
ENSG00000237418	AC069257.2	3	196298061	196298215	-	155	processed_pseudogene	ribosomal protein L39 (RPL39) pseudogene	-
ENSG00000251821	RNU6-583P	4	127891991	127892082	+	92	snRNA	RNA, U6 small nuclear 583, pseudogene [Source:HGNC Symbol;Acc:HGNC:47546]	-
ENSG00000112877	CEP72	5	612272	667168	+	3658	protein_coding	centrosomal protein 72 [Source:HGNC Symbol;Acc:HGNC:25547]	-
ENSG00000205572	SERF1B	5	70025247	70043113	+	3051	protein_coding	small EDRK-rich factor 1B [Source:HGNC Symbol;Acc:HGNC:10756]	-
ENSG00000250889	LINC01336	5	75047719	75052843	-	793	lincRNA	long intergenic non-protein coding RNA 1336 [Source:HGNC Symbol;Acc:HGNC:50543]	-
ENSG00000251495	PPIAP11	5	82009602	82010094	-	493	processed_pseudogene	peptidylprolyl isomerase A pseudogene 11 [Source:HGNC Symbol;Acc:HGNC:9263]	-
ENSG00000272468	AL021807.1	6	27122657	27123221	-	565	lincRNA	novel transcript	-
ENSG00000225644	RPL35AP4	6	33389374	33389475	-	102	processed_pseudogene	ribosomal protein L35a pseudogene 4 [Source:HGNC Symbol;Acc:HGNC:33460]	-
ENSG00000220583	RPL35P2	6	34263311	34263673	-	363	processed_pseudogene	ribosomal protein L35 pseudogene 2 [Source:HGNC Symbol;Acc:HGNC:35789]	-
ENSG00000197261	C6orf141	6	49550646	49561907	+	2940	protein_coding	chromosome 6 open reading frame 141 [Source:HGNC Symbol;Acc:HGNC:21351]	-
ENSG00000199094	MIR30C2	6	71376960	71377031	-	72	miRNA	microRNA 30c-2 [Source:HGNC Symbol;Acc:HGNC:31627]	-
ENSG00000135314	KHDC1	6	73241314	73310365	-	3350	protein_coding	KH domain containing 1 [Source:HGNC Symbol;Acc:HGNC:21366]	-
ENSG00000270419	CAHM	6	163413065	163413960	-	896	lincRNA	colon adenocarcinoma hypermethylated [Source:HGNC Symbol;Acc:HGNC:42860]	-
ENSG00000234286	AC006026.3	7	23680195	23680786	-	143	antisense	novel transcript	-
ENSG00000281332	LINC00997	7	32760279	32762924	+	2646	lincRNA	long intergenic non-protein coding RNA 997 [Source:HGNC Symbol;Acc:HGNC:48952]	-
ENSG00000234444	ZNF736	7	64307459	64354860	+	9409	protein_coding	zinc finger protein 736 [Source:HGNC Symbol;Acc:HGNC:32467]	zf-C2H2
ENSG00000224629	AC004975.1	7	157263022	157263229	-	208	processed_pseudogene	ribosomal protein L36 (RPL36A) pseudogene	-
ENSG00000281849	AL732314.6	X	386980	405579	+	484	antisense	novel transcript, antisense to PPP2R3B	-
ENSG00000230797	YY2	X	21855987	21858727	+	2741	protein_coding	YY2 transcription factor [Source:HGNC Symbol;Acc:HGNC:31684]	zf-C2H2
ENSG00000079482	OPHN1	X	68042344	68433913	-	8224	protein_coding	oligophrenin 1 [Source:HGNC Symbol;Acc:HGNC:8148]	-
ENSG00000275110	MIR6087	X	109054542	109054590	+	49	miRNA	microRNA 6087 [Source:HGNC Symbol;Acc:HGNC:50045]	-
ENSG00000272293	AC083964.1	8	450714	451343	-	630	antisense	novel transcript, antisense to FBXO25	-
ENSG00000253981	ALG1L13P	8	8236003	8244667	-	1447	transcribed_unprocessed_pseudogene	asparagine-linked glycosylation 1-like 13, pseudogene [Source:HGNC Symbol;Acc:HGNC:44382]	-
ENSG00000250794	ALG1L12P	8	12421032	12425000	+	434	unprocessed_pseudogene	asparagine-linked glycosylation 1-like 12, pseudogene [Source:HGNC Symbol;Acc:HGNC:44381]	-
ENSG00000079102	RUNX1T1	8	91954967	92103286	-	13535	protein_coding	RUNX1 translocation partner 1 [Source:HGNC Symbol;Acc:HGNC:1535]	-
ENSG00000104450	SPAG1	8	100157906	100259278	+	5055	protein_coding	sperm associated antigen 1 [Source:HGNC Symbol;Acc:HGNC:11212]	-
ENSG00000236739	CLIC4P1	9	22747700	22748234	+	535	processed_pseudogene	chloride intracellular channel 4 pseudogene 1 [Source:HGNC Symbol;Acc:HGNC:49797]	-
ENSG00000234819	AL353705.4	9	78219120	78219357	+	238	processed_pseudogene	CDC28 protein kinase regulatory subunit 2 (CKS2) pseudogene	-
ENSG00000196730	DAPK1	9	87497228	87708633	+	8907	protein_coding	death associated protein kinase 1 [Source:HGNC Symbol;Acc:HGNC:2674]	-
ENSG00000136928	GABBR2	9	98288082	98709197	-	7632	protein_coding	gamma-aminobutyric acid type B receptor subunit 2 [Source:HGNC Symbol;Acc:HGNC:4507]	-
ENSG00000254855	AP001107.8	11	66264777	66265666	-	479	antisense	novel transcript	-
ENSG00000160172	FAM86C2P	11	67791648	67805336	-	3402	transcribed_unprocessed_pseudogene	family with sequence similarity 86 member C2, pseudogene [Source:HGNC Symbol;Acc:HGNC:42392]	-
ENSG00000023171	GRAMD1B	11	123358428	123627774	+	14863	protein_coding	GRAM domain containing 1B [Source:HGNC Symbol;Acc:HGNC:29214]	-
ENSG00000257027	AC010186.3	12	9658567	9662085	+	2508	sense_intronic	novel transcript	-
ENSG00000257167	TMPO-AS1	12	98512973	98516422	-	3357	antisense	TMPO antisense RNA 1 [Source:HGNC Symbol;Acc:HGNC:44158]	-
ENSG00000255150	EID3	12	104303739	104305205	+	1467	protein_coding	EP300 interacting inhibitor of differentiation 3 [Source:HGNC Symbol;Acc:HGNC:32961]	-
ENSG00000236577	SNRPGP14	13	49488970	49489364	+	219	processed_pseudogene	small nuclear ribonucleoprotein polypeptide G pseudogene 14 [Source:HGNC Symbol;Acc:HGNC:42039]	-
ENSG00000119636	BBOF1	14	74019353	74082863	+	4620	protein_coding	basal body orientation factor 1 [Source:HGNC Symbol;Acc:HGNC:19855]	-
ENSG00000206924	RNU6-689P	14	75020761	75020867	+	107	snRNA	RNA, U6 small nuclear 689, pseudogene [Source:HGNC Symbol;Acc:HGNC:47652]	-
ENSG00000258602	LINC01629	14	76959638	76965802	+	581	lincRNA	long intergenic non-protein coding RNA 1629 [Source:HGNC Symbol;Acc:HGNC:52260]	-
ENSG00000207442	SNORD116-6	15	25065026	25065121	+	96	snoRNA	small nucleolar RNA, C/D box 116-6 [Source:HGNC Symbol;Acc:HGNC:33072]	-
ENSG00000224677	PDIA3P2	15	43649123	43649280	+	158	unprocessed_pseudogene	protein disulfide isomerase family A member 3 pseudogene 2 [Source:HGNC Symbol;Acc:HGNC:49403]	-
ENSG00000183655	KLHL25	15	85759323	85795030	-	7219	protein_coding	kelch like family member 25 [Source:HGNC Symbol;Acc:HGNC:25732]	-
ENSG00000280231	AL031719.2	16	1553655	1554130	-	476	TEC	tec	-
ENSG00000215154	AC141586.1	16	2603350	2630494	+	2751	transcribed_unprocessed_pseudogene	potassium channel tetramerization domain containing 5 pseudogene [Source:NCBI gene;Acc:652276]	-
ENSG00000285043	AC093512.2	16	30053090	30070420	+	3369	protein_coding	Homo sapiens aldolase, fructose-bisphosphate A (ALDOA), transcript variant 7, mRNA. [Source:RefSeq mRNA;Acc:NM_001355562]	-
ENSG00000234337	AC026462.1	16	52655307	52656045	+	739	processed_pseudogene	tropomyosin 1 (alpha) (TPM1) pseudogene	-
ENSG00000239763	AC009120.1	16	74312609	74313390	-	473	processed_pseudogene	ribosomal protein L21 (RPL21) pseudogene	-
ENSG00000266307	MIR5093	16	85306226	85306325	-	100	miRNA	microRNA 5093 [Source:HGNC Symbol;Acc:HGNC:43474]	-
ENSG00000278517	MIR6865	17	4970086	4970150	-	65	miRNA	microRNA 6865 [Source:HGNC Symbol;Acc:HGNC:50182]	-
ENSG00000227495	AC004771.1	17	5019214	5020093	-	583	antisense	uncharacterized LOC102724009 [Source:NCBI gene;Acc:102724009]	-
ENSG00000252274	RF00422	17	72818836	72818972	-	137	scaRNA		-
ENSG00000125454	SLC25A19	17	75272981	75289510	-	3316	protein_coding	solute carrier family 25 member 19 [Source:HGNC Symbol;Acc:HGNC:14409]	-
ENSG00000199961	SNORD1B	17	76561109	76561192	+	84	snoRNA	small nucleolar RNA, C/D box 1B [Source:HGNC Symbol;Acc:HGNC:32676]	-
ENSG00000276174	AC087683.2	18	42052705	42053030	+	326	sense_intronic	novel transcript, sense intronic to PIK3C3	-
ENSG00000225022	UBE2D3P1	20	5292388	5292831	-	444	processed_pseudogene	ubiquitin conjugating enzyme E2 D3 pseudogene 1 [Source:HGNC Symbol;Acc:HGNC:33349]	-
ENSG00000175730	BAK1P1	20	32690180	32690815	-	636	processed_pseudogene	BCL2 antagonist/killer 1 pseudogene 1 [Source:HGNC Symbol;Acc:HGNC:996]	-
ENSG00000273555	MIR6812	20	45425510	45425573	+	64	miRNA	microRNA 6812 [Source:HGNC Symbol;Acc:HGNC:50116]	-
ENSG00000087903	RFX2	19	5993164	6199572	-	9094	protein_coding	regulatory factor X2 [Source:HGNC Symbol;Acc:HGNC:9983]	RFX
ENSG00000180855	ZNF443	19	12429707	12441112	-	2753	protein_coding	zinc finger protein 443 [Source:HGNC Symbol;Acc:HGNC:20878]	zf-C2H2
ENSG00000187556	NANOS3	19	13862063	13880757	+	988	protein_coding	nanos C2HC-type zinc finger 3 [Source:HGNC Symbol;Acc:HGNC:22048]	-
ENSG00000105750	ZNF85	19	20923222	20950697	+	4668	protein_coding	zinc finger protein 85 [Source:HGNC Symbol;Acc:HGNC:13160]	zf-C2H2
ENSG00000268034	AC243960.2	19	41506152	41506898	+	747	processed_pseudogene	tropomyosin pseudogene	-
ENSG00000176024	ZNF613	19	51927147	51948759	+	3855	protein_coding	zinc finger protein 613 [Source:HGNC Symbol;Acc:HGNC:25827]	zf-C2H2
ENSG00000277588	MIR6806	19	58334688	58334751	+	64	miRNA	microRNA 6806 [Source:HGNC Symbol;Acc:HGNC:49937]	-
ENSG00000270083	AL021878.2	22	42089630	42090028	-	399	sense_intronic	novel transcript, sense intronic to NDUFA6	-

## Sheet: Bio_treated
gene_id	gene_name	gene_chr	gene_start	gene_end	gene_strand	gene_length	gene_biotype	gene_description	tf_family
ENSG00000236679	RPL23AP24	1	347982	348366	-	385	processed_pseudogene	ribosomal protein L23a pseudogene 24 [Source:HGNC Symbol;Acc:HGNC:36176]	-
ENSG00000202461	RF00019	1	12024012	12024124	-	113	misc_RNA		-
ENSG00000227959	AL451042.2	1	16155211	16157329	+	904	antisense	novel transcript	-
ENSG00000173436	MINOS1	1	19484403	19629821	+	5480	protein_coding	mitochondrial inner membrane organizing system 1 [Source:HGNC Symbol;Acc:HGNC:32068]	-
ENSG00000212541	RNU6-510P	1	37991462	37991569	+	108	snRNA	RNA, U6 small nuclear 510, pseudogene [Source:HGNC Symbol;Acc:HGNC:47473]	-
ENSG00000229431	AL139289.1	1	43385113	43389155	+	731	antisense	novel transcript	-
ENSG00000265996	MIR3671	1	65057755	65057842	-	88	miRNA	microRNA 3671 [Source:HGNC Symbol;Acc:HGNC:38925]	-
ENSG00000285928	AC103591.4	1	78022565	78024861	-	1795	lincRNA	novel transcript	-
ENSG00000117569	PTBP2	1	96721665	96823738	+	12937	protein_coding	polypyrimidine tract binding protein 2 [Source:HGNC Symbol;Acc:HGNC:17662]	-
ENSG00000134198	TSPAN2	1	115048011	115089500	-	3410	protein_coding	tetraspanin 2 [Source:HGNC Symbol;Acc:HGNC:20659]	-
ENSG00000261662	AL359752.1	1	119909255	119910613	-	1359	sense_overlapping	novel transcript, sense overlapping NOTCH2	-
ENSG00000222788	RNU2-38P	1	148939739	148939817	-	79	snRNA	RNA, U2 small nuclear 38, pseudogene [Source:HGNC Symbol;Acc:HGNC:48531]	-
ENSG00000221643	SNORA77	1	203729581	203729705	+	125	snoRNA	small nucleolar RNA, H/ACA box 77 [Source:HGNC Symbol;Acc:HGNC:32663]	-
ENSG00000162894	FCMR	1	206904386	206923247	-	2348	protein_coding	Fc fragment of IgM receptor [Source:HGNC Symbol;Acc:HGNC:14315]	-
ENSG00000234233	KCNH1-IT1	1	211132588	211133374	-	626	sense_intronic	KCNH1 intronic transcript 1 [Source:HGNC Symbol;Acc:HGNC:41351]	-
ENSG00000231663	AL355472.1	1	234372807	234373593	-	575	antisense	uncharacterized LOC101927765 [Source:NCBI gene;Acc:101927765]	-
ENSG00000229122	AGBL5-IT1	2	27061038	27061815	+	339	sense_intronic	AGBL5 intronic transcript 1 [Source:HGNC Symbol;Acc:HGNC:41484]	-
ENSG00000272148	AC013403.2	2	27062428	27062907	-	480	antisense	novel transcript, antisense to AGBL5	-
ENSG00000224646	AC007387.1	2	74754670	74754819	-	150	processed_pseudogene	ribosomal protein S28 (RPS28) pseudogene	-
ENSG00000202382	RF00019	2	85367585	85367686	+	102	misc_RNA		-
ENSG00000237753	FLJ42351	2	112641832	112645690	-	2022	lincRNA	uncharacterized LOC400999 [Source:NCBI gene;Acc:400999]	-
ENSG00000224577	LINC01117	2	176637710	176655958	+	699	lincRNA	long intergenic non-protein coding RNA 1117 [Source:HGNC Symbol;Acc:HGNC:49260]	-
ENSG00000273456	AC064836.3	2	202374932	202375604	-	673	lincRNA	novel transcript	-
ENSG00000281780	RF00134	2	206161841	206161929	+	89	snoRNA		-
ENSG00000233868	AC009302.1	2	221944223	221944612	+	390	processed_pseudogene	chromosome 12 open reading frame 31 (C12orf31) pseudogene	-
ENSG00000144485	HES6	2	238238267	238240662	-	2037	protein_coding	hes family bHLH transcription factor 6 [Source:HGNC Symbol;Acc:HGNC:18254]	bHLH
ENSG00000222020	AC062017.1	2	239401436	239402364	+	613	antisense	uncharacterized LOC101928111 [Source:NCBI gene;Acc:101928111]	-
ENSG00000207611	MIR149	2	240456001	240456089	+	89	miRNA	microRNA 149 [Source:HGNC Symbol;Acc:HGNC:31536]	-
ENSG00000163701	IL17RE	3	9902612	9916402	+	4676	protein_coding	interleukin 17 receptor E [Source:HGNC Symbol;Acc:HGNC:18439]	-
ENSG00000253056	RNU7-128P	3	48180328	48180389	+	62	snRNA	RNA, U7 small nuclear 128 pseudogene [Source:HGNC Symbol;Acc:HGNC:45662]	-
ENSG00000207926	MIR135A1	3	52294219	52294308	-	90	miRNA	microRNA 135a-1 [Source:HGNC Symbol;Acc:HGNC:31520]	-
ENSG00000273437	AC108673.3	3	129163606	129163940	-	335	lincRNA	novel transcript	-
ENSG00000272440	AC080013.6	3	158695367	158695581	+	215	lincRNA	novel transcript	-
ENSG00000284753	EEF1AKMT4	3	184249650	184259585	+	1823	protein_coding	EEF1A lysine methyltransferase 4 [Source:HGNC Symbol;Acc:HGNC:53611]	-
ENSG00000270195	AC016773.1	4	1712821	1713622	+	802	lincRNA	novel transcript	-
ENSG00000251615	AC104825.1	4	8355090	8358338	-	3249	lincRNA	novel transcript	-
ENSG00000174749	FAM241A	4	112145397	112195256	+	8901	protein_coding	family with sequence similarity 241 member A [Source:HGNC Symbol;Acc:HGNC:26813]	-
ENSG00000248632	AC106872.5	4	164968587	164970002	-	1416	processed_pseudogene	phenylalanyl-tRNA synthetase, beta subunit (FARSB) pseudogene	-
ENSG00000272744	AC107214.2	4	183516894	183517527	+	634	lincRNA	novel transcript	-
ENSG00000207231	RF00019	4	185415973	185416086	-	114	misc_RNA		-
ENSG00000272308	AC104113.1	5	60866457	60866935	-	479	lincRNA	novel transcript	-
ENSG00000145736	GTF2H2	5	71032670	71067689	-	8676	protein_coding	general transcription factor IIH subunit 2 [Source:HGNC Symbol;Acc:HGNC:4656]	-
ENSG00000199630	RF00019	6	89841329	89841424	+	96	misc_RNA		-
ENSG00000223811	AL589684.1	6	113357003	113367944	-	507	lincRNA	novel transcript	-
ENSG00000234084	AL049552.1	6	135301568	135307158	+	577	antisense	novel transcript	-
ENSG00000252244	RNU7-3P	6	149516956	149517017	+	62	snRNA	RNA, U7 small nuclear 3 pseudogene [Source:HGNC Symbol;Acc:HGNC:34099]	-
ENSG00000200847	RF00019	7	23491792	23491893	-	102	misc_RNA		-
ENSG00000272768	AC004854.2	7	44884953	44886393	+	1441	antisense	novel transcript, antisense to PURB	-
ENSG00000221520	MIR1285-1	7	92204015	92204098	-	84	miRNA	microRNA 1285-1 [Source:HGNC Symbol;Acc:HGNC:35277]	-
ENSG00000106246	PTCD1	7	99416739	99466163	-	5805	protein_coding	pentatricopeptide repeat domain 1 [Source:HGNC Symbol;Acc:HGNC:22198]	-
ENSG00000105989	WNT2	7	117275451	117323289	-	4497	protein_coding	Wnt family member 2 [Source:HGNC Symbol;Acc:HGNC:12780]	-
ENSG00000251728	RF00019	7	140094697	140094792	-	96	misc_RNA		-
ENSG00000274752	TRBV12-3	7	142560423	142560931	+	409	TR_V_gene	T cell receptor beta variable 12-3 [Source:HGNC Symbol;Acc:HGNC:12185]	-
ENSG00000251712	RNU7-20P	7	148821012	148821073	+	62	snRNA	RNA, U7 small nuclear 20 pseudogene [Source:HGNC Symbol;Acc:HGNC:34116]	-
ENSG00000265465	MIR4768	X	17425881	17425954	+	74	miRNA	microRNA 4768 [Source:HGNC Symbol;Acc:HGNC:41592]	-
ENSG00000187243	MAGED4B	X	52061827	52069248	-	4947	protein_coding	MAGE family member D4B [Source:HGNC Symbol;Acc:HGNC:22880]	-
ENSG00000252147	RNY3P16	X	119456558	119456658	+	101	misc_RNA	RNA, Ro-associated Y3 pseudogene 16 [Source:HGNC Symbol;Acc:HGNC:50891]	-
ENSG00000277150	F8A3	X	155456914	155458672	-	1759	protein_coding	coagulation factor VIII associated 3 [Source:HGNC Symbol;Acc:HGNC:31850]	-
ENSG00000246089	AC016065.1	8	6403551	6407142	-	2934	antisense	uncharacterized LOC100287015 [Source:NCBI gene;Acc:100287015]	-
ENSG00000213881	NPM1P6	8	61202350	61203220	+	871	processed_pseudogene	nucleophosmin 1 pseudogene 6 [Source:HGNC Symbol;Acc:HGNC:7926]	-
ENSG00000272010	AC100814.1	8	65591850	65592472	-	623	lincRNA	novel transcript	-
ENSG00000046889	PREX2	8	67952118	68237030	+	12058	protein_coding	phosphatidylinositol-3,4,5-trisphosphate dependent Rac exchange factor 2 [Source:HGNC Symbol;Acc:HGNC:22950]	-
ENSG00000212994	RPS26P6	8	100895771	100896118	+	348	processed_pseudogene	ribosomal protein S26 pseudogene 6 [Source:HGNC Symbol;Acc:HGNC:31090]	-
ENSG00000189376	C8orf76	8	123219957	123241398	-	2467	protein_coding	chromosome 8 open reading frame 76 [Source:HGNC Symbol;Acc:HGNC:25924]	-
ENSG00000200544	RF00019	9	33352788	33352874	-	87	misc_RNA		-
ENSG00000147996	CBWD5	9	65668805	65734041	+	12708	protein_coding	COBW domain containing 5 [Source:HGNC Symbol;Acc:HGNC:24584]	-
ENSG00000278763	FAM27B	9	67725690	67725902	-	213	processed_pseudogene	family with sequence similarity 27 member B [Source:HGNC Symbol;Acc:HGNC:23667]	-
ENSG00000236060	HSPB1P1	9	72007881	72008136	-	256	processed_pseudogene	heat shock protein family B (small) member 1 pseudogene 1 [Source:HGNC Symbol;Acc:HGNC:5251]	-
ENSG00000269946	AL158152.2	9	94166289	94200627	+	235	lincRNA	novel transcript	-
ENSG00000238406	RNU7-171P	9	128543916	128543977	+	62	snRNA	RNA, U7 small nuclear 171 pseudogene [Source:HGNC Symbol;Acc:HGNC:45705]	-
ENSG00000050555	LAMC3	9	131009082	131094473	+	7594	protein_coding	laminin subunit gamma 3 [Source:HGNC Symbol;Acc:HGNC:6494]	-
ENSG00000187796	CARD9	9	136361903	136373681	-	6699	protein_coding	caspase recruitment domain family member 9 [Source:HGNC Symbol;Acc:HGNC:16391]	-
ENSG00000255400	AC124276.2	11	12086891	12089441	+	550	lincRNA	novel transcript	-
ENSG00000252361	RNU6-118P	11	62815966	62816067	-	102	snRNA	RNA, U6 small nuclear 118, pseudogene [Source:HGNC Symbol;Acc:HGNC:47081]	-
ENSG00000207200	RNU6-45P	11	63970470	63970576	+	107	snRNA	RNA, U6 small nuclear 45, pseudogene [Source:HGNC Symbol;Acc:HGNC:34289]	-
ENSG00000207445	SNORD15B	11	75404421	75404566	+	146	snoRNA	small nucleolar RNA, C/D box 15B [Source:HGNC Symbol;Acc:HGNC:16649]	-
ENSG00000085741	WNT11	11	76186325	76210736	-	2401	protein_coding	Wnt family member 11 [Source:HGNC Symbol;Acc:HGNC:12776]	-
ENSG00000199709	RNU4-23P	11	122927034	122927173	+	140	snRNA	RNA, U4 small nuclear 23, pseudogene [Source:HGNC Symbol;Acc:HGNC:46959]	-
ENSG00000272507	RNU6-88P	10	12116280	12116379	-	100	snRNA	RNA, U6 small nuclear 88, pseudogene [Source:HGNC Symbol;Acc:HGNC:47051]	-
ENSG00000227540	DNAJC9-AS1	10	73252791	73254349	+	940	antisense	DNAJC9 antisense RNA 1 [Source:NCBI gene;Acc:414245]	-
ENSG00000180139	ACTA2-AS1	10	88932390	88940820	+	3183	antisense	ACTA2 antisense RNA 1 [Source:HGNC Symbol;Acc:HGNC:45169]	-
ENSG00000277959	AL162274.2	10	131971202	131971533	+	332	antisense	novel transcript, antisense to BNIP3	-
ENSG00000274943	AC079684.1	12	42361267	42361703	+	437	sense_intronic	novel transcript, sense intronic to PPHLN1	-
ENSG00000257671	KRT7-AS	12	52245048	52247448	-	1693	antisense	KRT7 antisense RNA 1 [Source:HGNC Symbol;Acc:HGNC:52643]	-
ENSG00000270175	AC023509.4	12	53500162	53500936	-	775	antisense	novel transcript, antisense to TARBP2	-
ENSG00000201579	RNU6-343P	12	56588518	56588621	+	104	snRNA	RNA, U6 small nuclear 343, pseudogene [Source:HGNC Symbol;Acc:HGNC:47306]	-
ENSG00000255737	AGAP2-AS1	12	57726271	57728356	+	1500	antisense	AGAP2 antisense RNA 1 [Source:HGNC Symbol;Acc:HGNC:48633]	-
ENSG00000274427	AC145423.2	12	123515275	123515513	-	239	sense_intronic	novel transcript, sense intronic to RILPL1	-
ENSG00000278112	AC145423.3	12	123519390	123519856	-	467	sense_intronic	novel transcript, sense intronic to RILPL1	-
ENSG00000277052	MIR6763	12	132581997	132582061	+	65	miRNA	microRNA 6763 [Source:HGNC Symbol;Acc:HGNC:50139]	-
ENSG00000231530	AL157932.1	13	42043727	42044247	-	363	antisense	novel transcript	-
ENSG00000269125	AL137002.1	13	113165002	113165183	-	182	antisense	novel transcript, antisense to PROZ	-
ENSG00000277050	AL122125.1	14	51637348	51637947	-	600	antisense	novel transcript, antisense to FRMD6	-
ENSG00000119723	COQ6	14	73949926	73963670	+	6686	protein_coding	coenzyme Q6, monooxygenase [Source:HGNC Symbol;Acc:HGNC:20233]	-
ENSG00000212371	RF00404	14	77466284	77466436	+	153	snoRNA		-
ENSG00000274253	AC138649.1	15	22757857	22778741	+	1640	sense_overlapping	uncharacterized LOC283683 [Source:NCBI gene;Acc:283683]	-
ENSG00000259498	TPM1-AS	15	63046034	63049387	-	3354	antisense	TPM1 antisense RNA [Source:HGNC Symbol;Acc:HGNC:53635]	-
ENSG00000274297	AC009269.5	15	70758269	70758856	-	588	sense_intronic	novel transcript, sense intronic to UACA	-
ENSG00000260165	AC105036.2	15	75480661	75480836	+	176	unprocessed_pseudogene	microtubule associated serine/threonine kinase 2 (MAST2) pseudogene	-
ENSG00000184508	HDDC3	15	90929964	90935196	-	5233	protein_coding	HD domain containing 3 [Source:HGNC Symbol;Acc:HGNC:30522]	-
ENSG00000184056	VPS33B	15	90998416	91022603	-	4012	protein_coding	VPS33B, late endosome and lysosome associated [Source:HGNC Symbol;Acc:HGNC:12712]	-
ENSG00000275322	AC103746.1	15	96342953	96345651	+	1133	lincRNA	novel transcript	-
ENSG00000261889	AC108134.2	16	3156736	3157483	-	748	lincRNA	novel transcript	-
ENSG00000276096	RF00017	16	4756338	4756633	+	296	misc_RNA		-
ENSG00000260136	AC008915.2	16	23452758	23457606	+	1007	lincRNA	novel transcript	-
ENSG00000260751	AC008870.2	16	23568673	23569696	+	1024	sense_intronic	novel transcript	-
ENSG00000169203	NPIPB12	16	29483642	29505999	-	4331	protein_coding	nuclear pore complex interacting protein family, member B12 [Source:HGNC Symbol;Acc:HGNC:37491]	-
ENSG00000205362	MT1A	16	56638666	56640087	+	396	protein_coding	metallothionein 1A [Source:HGNC Symbol;Acc:HGNC:7393]	-
ENSG00000217555	CKLF	16	66552563	66566251	+	1161	protein_coding	chemokine like factor [Source:HGNC Symbol;Acc:HGNC:13253]	-
ENSG00000251794	RNU6-237P	16	74456541	74456611	+	71	snRNA	RNA, U6 small nuclear 237, pseudogene [Source:HGNC Symbol;Acc:HGNC:47200]	-
ENSG00000187624	C17orf97	17	410327	431062	+	2710	protein_coding	chromosome 17 open reading frame 97 [Source:HGNC Symbol;Acc:HGNC:33800]	-
ENSG00000277491	AC087392.5	17	795306	795794	+	489	lincRNA	novel transcript	-
ENSG00000272911	AC005696.3	17	2688473	2688960	+	303	lincRNA	novel transcript	-
ENSG00000262519	TXNP4	17	4572206	4572515	+	310	processed_pseudogene	thioredoxin pseudogene 4 [Source:HGNC Symbol;Acc:HGNC:49484]	-
ENSG00000269947	AC135178.5	17	8277763	8278436	+	674	lincRNA	novel transcript	-
ENSG00000205309	NT5M	17	17303335	17347663	+	1961	protein_coding	5',3'-nucleotidase, mitochondrial [Source:HGNC Symbol;Acc:HGNC:15769]	-
ENSG00000207839	MIR33B	17	17813836	17813931	-	96	miRNA	microRNA 33b [Source:HGNC Symbol;Acc:HGNC:32791]	-
ENSG00000264608	AC005726.3	17	28601827	28602284	-	458	sense_intronic	novel transcript, sense intronic to novel protein	-
ENSG00000215769	ARHGAP27P1-BPTFP1-KPNA2P3	17	64749663	64781707	-	3038	processed_transcript	ARHGAP27P1-BPTFP1-KPNA2P3 readthrough, transcribed pseudogene [Source:HGNC Symbol;Acc:HGNC:52873]	-
ENSG00000277476	AC005332.5	17	68133201	68135935	+	2735	lincRNA	novel transcript	-
ENSG00000204316	MRPL38	17	75898643	75905413	-	3663	protein_coding	mitochondrial ribosomal protein L38 [Source:HGNC Symbol;Acc:HGNC:14033]	-
ENSG00000278876	AC145207.9	17	81862778	81863102	+	325	TEC	TEC	-
ENSG00000267480	AP001542.3	18	12031178	12032181	-	527	antisense	novel transcript, antisense IMPA2	-
ENSG00000275632	AL035461.2	20	6000418	6000941	+	524	lincRNA	novel transcript	-
ENSG00000209042	SNORD12C	20	49278940	49279028	+	89	snoRNA	small nucleolar RNA, C/D box 12C [Source:HGNC Symbol;Acc:HGNC:10105]	-
ENSG00000274034	MIR6813	20	64076955	64077010	-	56	miRNA	microRNA 6813 [Source:HGNC Symbol;Acc:HGNC:50017]	-
ENSG00000252408	RF00212	19	3521248	3521320	-	73	snoRNA		-
ENSG00000212123	PRR22	19	5782960	5784765	-	1806	protein_coding	proline rich 22 [Source:HGNC Symbol;Acc:HGNC:28354]	-
ENSG00000267959	MIR3188	19	18282077	18282161	+	85	miRNA	microRNA 3188 [Source:HGNC Symbol;Acc:HGNC:38226]	-
ENSG00000261824	LINC00662	19	27684580	27793940	-	7958	lincRNA	long intergenic non-protein coding RNA 662 [Source:HGNC Symbol;Acc:HGNC:27122]	-
ENSG00000267049	AC002398.1	19	35769144	35771028	-	427	antisense	novel transcript	-
ENSG00000187994	RINL	19	38867834	38878279	-	4201	protein_coding	Ras and Rab interactor like [Source:HGNC Symbol;Acc:HGNC:24795]	-
ENSG00000206674	RNU6-945P	19	40299478	40299584	-	107	snRNA	RNA, U6 small nuclear 945, pseudogene [Source:HGNC Symbol;Acc:HGNC:47908]	-
ENSG00000188368	PRR19	19	42302098	42310821	+	2575	protein_coding	proline rich 19 [Source:HGNC Symbol;Acc:HGNC:33728]	-
ENSG00000167637	ZNF283	19	43827292	43852017	+	7229	protein_coding	zinc finger protein 283 [Source:HGNC Symbol;Acc:HGNC:13077]	zf-C2H2
ENSG00000277806	AC006213.4	19	43976815	43977448	+	634	sense_intronic	novel transcript, sense intronic to ZNF155	-
ENSG00000268746	AC010519.1	19	47607524	47733098	+	344	lincRNA	novel transcript	-
ENSG00000283103	AC010642.2	19	58310449	58326933	-	2413	antisense	novel transcript, antisense to ERVK3-1	-
ENSG00000099998	GGT5	22	24219654	24245142	-	6054	protein_coding	gamma-glutamyltransferase 5 [Source:HGNC Symbol;Acc:HGNC:4260]	-
ENSG00000239900	ADSL	22	40346500	40390463	+	7111	protein_coding	adenylosuccinate lyase [Source:HGNC Symbol;Acc:HGNC:291]	-
ENSG00000183569	SERHL2	22	42553617	42574382	+	2821	protein_coding	serine hydrolase like 2 [Source:HGNC Symbol;Acc:HGNC:29446]	-
ENSG00000241990	PRR34-AS1	22	46053705	46057210	+	1093	antisense	PRR34 antisense RNA 1 [Source:HGNC Symbol;Acc:HGNC:50499]	-
ENSG00000166979	EVA1C	21	32412006	32515397	+	4353	protein_coding	eva-1 homolog C [Source:HGNC Symbol;Acc:HGNC:13239]	-
ENSG00000141956	PRDM15	21	41798225	41879482	-	13004	protein_coding	PR/SET domain 15 [Source:HGNC Symbol;Acc:HGNC:13999]	zf-C2H2

## Sheet: Casp_treated
gene_id	gene_name	gene_chr	gene_start	gene_end	gene_strand	gene_length	gene_biotype	gene_description	tf_family
ENSG00000269737	AL691432.1	1	1671990	1674397	+	1819	transcribed_processed_pseudogene	ribosomal protein S7 (RPS7) pseudogene	-
ENSG00000272482	AC254633.1	1	12618900	12619244	-	345	lincRNA	novel transcript	-
ENSG00000237938	AL450998.2	1	15720312	15736896	-	1533	antisense	novel transcript, antisense to SLC25A34 and PLEKHM2	-
ENSG00000237276	ANO7L1	1	16215909	16228027	-	1990	transcribed_unprocessed_pseudogene	anoctamin 7 like 1 [Source:HGNC Symbol;Acc:HGNC:32248]	-
ENSG00000226526	AL049569.1	1	16978926	17005091	+	636	antisense	novel transcript	-
ENSG00000266203	MIR5585	1	32086949	32087007	+	59	miRNA	microRNA 5585 [Source:HGNC Symbol;Acc:HGNC:43452]	-
ENSG00000222112	RN7SKP16	1	33336566	33336864	-	299	misc_RNA	RNA, 7SK small nuclear pseudogene 16 [Source:HGNC Symbol;Acc:HGNC:45740]	-
ENSG00000163879	DNALI1	1	37556919	37566857	+	4456	protein_coding	dynein axonemal light intermediate chain 1 [Source:HGNC Symbol;Acc:HGNC:14353]	-
ENSG00000252448	RF00092	1	37884237	37884317	+	81	snoRNA		-
ENSG00000222282	RNU6-584P	1	37885023	37885117	+	95	snRNA	RNA, U6 small nuclear 584, pseudogene [Source:HGNC Symbol;Acc:HGNC:47547]	-
ENSG00000243970	PPIEL	1	39522280	39559671	-	5416	transcribed_unprocessed_pseudogene	peptidylprolyl isomerase E like pseudogene [Source:HGNC Symbol;Acc:HGNC:33195]	-
ENSG00000049089	COL9A2	1	40300487	40317813	-	4217	protein_coding	collagen type IX alpha 2 chain [Source:HGNC Symbol;Acc:HGNC:2218]	-
ENSG00000162415	ZSWIM5	1	45016399	45306209	-	6046	protein_coding	zinc finger SWIM-type containing 5 [Source:HGNC Symbol;Acc:HGNC:29299]	-
ENSG00000272100	AL513218.1	1	52353487	52353877	+	391	antisense	novel transcript, antisense to CC2D1B	-
ENSG00000132849	PATJ	1	61742406	62178675	+	11990	protein_coding	PATJ, crumbs cell polarity complex component [Source:HGNC Symbol;Acc:HGNC:28881]	-
ENSG00000241975	ELOCP19	1	88829102	88829419	+	318	processed_pseudogene	elongin C pseudogene 19 [Source:HGNC Symbol;Acc:HGNC:38155]	-
ENSG00000064886	CHI3L2	1	111200771	111243440	+	3295	protein_coding	chitinase 3 like 2 [Source:HGNC Symbol;Acc:HGNC:1933]	-
ENSG00000227811	INKA2-AS1	1	111739841	111747798	+	2131	bidirectional_promoter_lncRNA	INKA2 antisense RNA 1 [Source:HGNC Symbol;Acc:HGNC:49446]	-
ENSG00000273768	RF00003	1	146376807	146376970	+	164	snRNA		-
ENSG00000283676	MIR5087	1	148334479	148334554	-	76	miRNA	microRNA 5087 [Source:HGNC Symbol;Acc:HGNC:43480]	-
ENSG00000276103	RF00015	1	150608507	150608623	-	117	snRNA		-
ENSG00000163131	CTSS	1	150730196	150765957	-	4228	protein_coding	cathepsin S [Source:HGNC Symbol;Acc:HGNC:2545]	-
ENSG00000169474	SPRR1A	1	152985231	152985500	+	270	protein_coding	small proline rich protein 1A [Source:HGNC Symbol;Acc:HGNC:11259]	-
ENSG00000189334	S100A14	1	153614255	153616986	-	1277	protein_coding	S100 calcium binding protein A14 [Source:HGNC Symbol;Acc:HGNC:18901]	-
ENSG00000169242	EFNA1	1	155127460	155134857	+	2539	protein_coding	ephrin A1 [Source:HGNC Symbol;Acc:HGNC:3221]	-
ENSG00000271267	AL353807.4	1	155566050	155566306	-	257	processed_pseudogene	ATP synthase, H+ transporting, mitochondrial Fo complex, subunit F2 (ATP5J2) pseudogene	-
ENSG00000283442	RF00015	1	155894281	155894386	+	106	snRNA		-
ENSG00000132698	RAB25	1	156061160	156070514	+	1699	protein_coding	RAB25, member RAS oncogene family [Source:HGNC Symbol;Acc:HGNC:18238]	-
ENSG00000228606	AL139011.1	1	160261744	160262778	+	821	antisense	novel transcript	-
ENSG00000269887	AL391001.1	1	164680085	164680799	+	715	sense_intronic	novel transcript, sense intronic to PBX1	-
ENSG00000159166	LAD1	1	201373244	201399915	-	3482	protein_coding	ladinin 1 [Source:HGNC Symbol;Acc:HGNC:6472]	-
ENSG00000235449	AC098934.3	1	202767229	202767418	-	190	processed_pseudogene	cytochrome c oxidase subunit VIIc (COX7C) pseudogene	-
ENSG00000117266	CDK18	1	205504595	205532793	+	6831	protein_coding	cyclin dependent kinase 18 [Source:HGNC Symbol;Acc:HGNC:8751]	-
ENSG00000235386	AC113174.1	1	246818076	246818180	+	105	unprocessed_pseudogene	pseudogene similar to part of microfibrillar-associated protein 2 (MFAP2)	-
ENSG00000231083	AC011747.1	2	8600892	8622942	-	565	lincRNA	novel transcript	-
ENSG00000176732	PFN4	2	24115371	24123477	-	1056	protein_coding	profilin family member 4 [Source:HGNC Symbol;Acc:HGNC:31103]	-
ENSG00000152154	TMEM178A	2	39664982	39717963	+	2470	protein_coding	transmembrane protein 178A [Source:HGNC Symbol;Acc:HGNC:28517]	-
ENSG00000162881	OXER1	2	42762481	42764261	-	1781	protein_coding	oxoeicosanoid receptor 1 [Source:HGNC Symbol;Acc:HGNC:24884]	-
ENSG00000152527	PLEKHH2	2	43637273	43767987	+	9835	protein_coding	pleckstrin homology, MyTH4 and FERM domain containing H2 [Source:HGNC Symbol;Acc:HGNC:30506]	-
ENSG00000162927	PUS10	2	60940222	61018259	-	7651	protein_coding	pseudouridylate synthase 10 [Source:HGNC Symbol;Acc:HGNC:26505]	-
ENSG00000197329	PELI1	2	64092652	64144454	-	4125	protein_coding	pellino E3 ubiquitin protein ligase 1 [Source:HGNC Symbol;Acc:HGNC:8827]	-
ENSG00000144031	ANKRD53	2	70978380	70985499	+	2526	protein_coding	ankyrin repeat domain 53 [Source:HGNC Symbol;Acc:HGNC:25691]	-
ENSG00000187605	TET3	2	73986404	74108176	+	12271	protein_coding	tet methylcytosine dioxygenase 3 [Source:HGNC Symbol;Acc:HGNC:28313]	-
ENSG00000115008	IL1A	2	112773915	112784590	-	2124	protein_coding	interleukin 1 alpha [Source:HGNC Symbol;Acc:HGNC:5991]	-
ENSG00000264075	MIR4783	2	127423537	127423618	-	82	miRNA	microRNA 4783 [Source:HGNC Symbol;Acc:HGNC:41874]	-
ENSG00000152076	CCDC74B	2	130139287	130145134	-	4487	protein_coding	coiled-coil domain containing 74B [Source:HGNC Symbol;Acc:HGNC:25267]	-
ENSG00000176771	NCKAP5	2	132671799	133568463	-	9552	protein_coding	NCK associated protein 5 [Source:HGNC Symbol;Acc:HGNC:29847]	-
ENSG00000115919	KYNU	2	142877498	143055832	+	17600	protein_coding	kynureninase [Source:HGNC Symbol;Acc:HGNC:6469]	-
ENSG00000204406	MBD5	2	148021011	148516971	+	24256	protein_coding	methyl-CpG binding domain protein 5 [Source:HGNC Symbol;Acc:HGNC:20444]	-
ENSG00000204311	PJVK	2	178451346	178461409	+	3788	protein_coding	pejvakin [Source:HGNC Symbol;Acc:HGNC:29502]	-
ENSG00000115252	PDE1A	2	182140036	182523192	-	6322	protein_coding	phosphodiesterase 1A [Source:HGNC Symbol;Acc:HGNC:8774]	-
ENSG00000162944	RFTN2	2	197568224	197676045	-	6007	protein_coding	raftlin family member 2 [Source:HGNC Symbol;Acc:HGNC:26402]	-
ENSG00000138380	CARF	2	202912214	202987063	+	8636	protein_coding	calcium responsive transcription factor [Source:HGNC Symbol;Acc:HGNC:14435]	Others
ENSG00000243650	RN7SL834P	2	230507101	230507386	+	286	misc_RNA	RNA, 7SL, cytoplasmic 834, pseudogene [Source:HGNC Symbol;Acc:HGNC:46850]	-
ENSG00000206885	SNORA75	2	231455800	231455936	-	137	snoRNA	small nucleolar RNA, H/ACA box 75 [Source:HGNC Symbol;Acc:HGNC:32661]	-
ENSG00000237641	AC073476.1	2	231789481	231789887	-	407	processed_pseudogene	ribosomal protein L28 (RPL28) pseudogene	-
ENSG00000226992	AC145625.1	2	238788648	238789716	-	592	lincRNA	novel transcript	-
ENSG00000178602	OTOS	2	240139026	240144562	-	645	protein_coding	otospiralin [Source:HGNC Symbol;Acc:HGNC:22644]	-
ENSG00000206567	AC022007.1	3	10006418	10011209	-	2533	lincRNA	novel transcript	-
ENSG00000132182	NUP210	3	13316235	13420309	-	8182	protein_coding	nucleoporin 210 [Source:HGNC Symbol;Acc:HGNC:30052]	-
ENSG00000168026	TTC21A	3	39107704	39138903	+	7677	protein_coding	tetratricopeptide repeat domain 21A [Source:HGNC Symbol;Acc:HGNC:30761]	-
ENSG00000163815	CLEC3B	3	45001548	45036071	+	1105	protein_coding	C-type lectin domain family 3 member B [Source:HGNC Symbol;Acc:HGNC:11891]	-
ENSG00000160801	PTH1R	3	46877746	46903799	+	2758	protein_coding	parathyroid hormone 1 receptor [Source:HGNC Symbol;Acc:HGNC:9608]	-
ENSG00000273682	AC109583.2	3	46918807	46918935	-	129	processed_pseudogene	biliverdin reductase B (flavin reductase (NADPH) (BLVRB) pseudogene	-
ENSG00000114841	DNAH1	3	52316319	52400491	+	13872	protein_coding	dynein axonemal heavy chain 1 [Source:HGNC Symbol;Acc:HGNC:2940]	-
ENSG00000056736	IL17RB	3	53846580	53865800	+	3038	protein_coding	interleukin 17 receptor B [Source:HGNC Symbol;Acc:HGNC:18015]	-
ENSG00000241634	AC069499.1	3	108543367	108543875	-	509	processed_pseudogene	ribosomal protein L13 (RPL13) pseudogene	-
ENSG00000176542	USF3	3	113648385	113696646	-	13738	protein_coding	upstream transcription factor family member 3 [Source:HGNC Symbol;Acc:HGNC:30494]	bHLH
ENSG00000185565	LSAMP	3	115802363	117139389	-	10330	protein_coding	limbic system associated membrane protein [Source:HGNC Symbol;Acc:HGNC:6705]	-
ENSG00000158258	CLSTN2	3	139935185	140577397	+	14596	protein_coding	calsyntenin 2 [Source:HGNC Symbol;Acc:HGNC:17448]	-
ENSG00000181804	SLC9A9	3	143265222	143848531	-	4087	protein_coding	solute carrier family 9 member A9 [Source:HGNC Symbol;Acc:HGNC:20653]	-
ENSG00000244468	AC093001.1	3	149284782	149333653	+	551	antisense	novel transcript	-
ENSG00000189058	APOD	3	195568702	195584205	-	2197	protein_coding	apolipoprotein D [Source:HGNC Symbol;Acc:HGNC:612]	-
ENSG00000163993	S100P	4	6693069	6697170	+	1280	protein_coding	S100 calcium binding protein P [Source:HGNC Symbol;Acc:HGNC:10504]	-
ENSG00000248049	UBA6-AS1	4	67701280	68080952	+	5575	antisense	UBA6 antisense RNA 1 (head to head) [Source:HGNC Symbol;Acc:HGNC:49083]	-
ENSG00000145283	SLC10A6	4	86823468	86849263	-	1502	protein_coding	solute carrier family 10 member 6 [Source:HGNC Symbol;Acc:HGNC:30603]	-
ENSG00000252548	RNU7-149P	4	98966815	98966873	-	59	snRNA	RNA, U7 small nuclear 149 pseudogene [Source:HGNC Symbol;Acc:HGNC:45683]	-
ENSG00000138821	SLC39A8	4	102251041	102431258	-	6480	protein_coding	solute carrier family 39 member 8 [Source:HGNC Symbol;Acc:HGNC:20862]	-
ENSG00000168769	TET2	4	105145875	105279816	+	16474	protein_coding	tet methylcytosine dioxygenase 2 [Source:HGNC Symbol;Acc:HGNC:25941]	-
ENSG00000073331	ALPK1	4	112285509	112442620	+	12325	protein_coding	alpha kinase 1 [Source:HGNC Symbol;Acc:HGNC:20917]	-
ENSG00000260404	AC110079.1	4	118591773	118633729	+	4422	transcribed_unprocessed_pseudogene	uncharacterized LOC729218 [Source:NCBI gene;Acc:729218]	-
ENSG00000251432	AC108062.1	4	128292751	128519394	+	3283	lincRNA	uncharacterized LOC100507487 [Source:NCBI gene;Acc:100507487]	-
ENSG00000109472	CPE	4	165361194	165498320	+	2958	protein_coding	carboxypeptidase E [Source:HGNC Symbol;Acc:HGNC:2303]	-
ENSG00000186493	C5orf38	5	2752131	2755397	+	1925	protein_coding	chromosome 5 open reading frame 38 [Source:HGNC Symbol;Acc:HGNC:24226]	-
ENSG00000250337	PURPL	5	27472292	27496401	+	2638	lincRNA	p53 upregulated regulator of p53 levels [Source:HGNC Symbol;Acc:HGNC:48995]	-
ENSG00000215068	AC025171.2	5	43041575	43045390	+	2773	antisense	uncharacterized LOC153684 [Source:NCBI gene;Acc:153684]	-
ENSG00000069020	MAST4	5	66596361	67169595	+	14675	protein_coding	microtubule associated serine/threonine kinase family member 4 [Source:HGNC Symbol;Acc:HGNC:19037]	-
ENSG00000249639	AC022092.1	5	135450613	135458697	+	504	antisense	novel transcript, antisense to TIFAB	-
ENSG00000206989	SNORD63	5	138561043	138561110	-	68	snoRNA	small nucleolar RNA, C/D box 63 [Source:HGNC Symbol;Acc:HGNC:10220]	-
ENSG00000253731	PCDHGA6	5	141373914	141512979	+	7910	protein_coding	protocadherin gamma subfamily A, 6 [Source:HGNC Symbol;Acc:HGNC:8704]	-
ENSG00000183111	ARHGEF37	5	149551947	149634968	+	5324	protein_coding	Rho guanine nucleotide exchange factor 37 [Source:HGNC Symbol;Acc:HGNC:34430]	-
ENSG00000253522	MIR3142HG	5	160438594	160487426	+	2377	lincRNA	MIR3142 host gene [Source:HGNC Symbol;Acc:HGNC:51944]	-
ENSG00000137266	SLC22A23	6	3268962	3457022	-	8898	protein_coding	solute carrier family 22 member 23 [Source:HGNC Symbol;Acc:HGNC:21106]	-
ENSG00000263712	MIR4639	6	16141556	16141624	+	69	miRNA	microRNA 4639 [Source:HGNC Symbol;Acc:HGNC:41645]	-
ENSG00000111913	RIPOR2	6	24804281	25042170	-	9536	protein_coding	RHO family interacting cell polarization regulator 2 [Source:HGNC Symbol;Acc:HGNC:13872]	-
ENSG00000273340	MICE	6	29741731	29748969	-	1157	transcribed_unprocessed_pseudogene	MHC class I polypeptide-related sequence E (pseudogene) [Source:HGNC Symbol;Acc:HGNC:7094]	-
ENSG00000213760	ATP6V1G2	6	31544462	31548427	-	2147	protein_coding	ATPase H+ transporting V1 subunit G2 [Source:HGNC Symbol;Acc:HGNC:862]	-
ENSG00000227507	LTB	6	31580525	31582522	-	1535	protein_coding	lymphotoxin beta [Source:HGNC Symbol;Acc:HGNC:6711]	-
ENSG00000204390	HSPA1L	6	31809619	31815065	-	2544	protein_coding	heat shock protein family A (Hsp70) member 1 like [Source:HGNC Symbol;Acc:HGNC:5234]	-
ENSG00000199036	MIR219A1	6	33207835	33207944	+	110	miRNA	microRNA 219a-1 [Source:HGNC Symbol;Acc:HGNC:31597]	-
ENSG00000112599	GUCA1B	6	42184401	42194916	-	1113	protein_coding	guanylate cyclase activator 1B [Source:HGNC Symbol;Acc:HGNC:4679]	-
ENSG00000172426	RSPH9	6	43645046	43672599	+	2631	protein_coding	radial spoke head 9 homolog [Source:HGNC Symbol;Acc:HGNC:21057]	-
ENSG00000124749	COL21A1	6	56056590	56394094	-	7078	protein_coding	collagen type XXI alpha 1 chain [Source:HGNC Symbol;Acc:HGNC:17025]	-
ENSG00000198478	SH3BGRL2	6	79631283	79703659	+	4653	protein_coding	SH3 domain binding glutamate rich protein like 2 [Source:HGNC Symbol;Acc:HGNC:15567]	-
ENSG00000120262	CCDC170	6	151494030	151621193	+	5419	protein_coding	coiled-coil domain containing 170 [Source:HGNC Symbol;Acc:HGNC:21177]	-
ENSG00000252658	RNU6-786P	6	157934168	157934257	+	90	snRNA	RNA, U6 small nuclear 786, pseudogene [Source:HGNC Symbol;Acc:HGNC:47749]	-
ENSG00000213073	AL353625.1	6	160093082	160096212	+	3131	transcribed_processed_pseudogene	calcineurin like EF-hand protein 1 pseudogene [Source:NCBI gene;Acc:729603]	-
ENSG00000261039	LINC02544	6	169175304	169182740	-	544	lincRNA	long intergenic non-protein coding RNA 2544 [Source:HGNC Symbol;Acc:HGNC:53578]	-
ENSG00000232821	AC003986.2	7	19112474	19114271	+	1711	antisense	novel transcript	-
ENSG00000203446	AC004988.1	7	40538127	40546928	-	1771	antisense	novel transcript	-
ENSG00000106633	GCK	7	44144271	44198170	-	4122	protein_coding	glucokinase [Source:HGNC Symbol;Acc:HGNC:4195]	-
ENSG00000176826	FKBP9P1	7	55681074	55713252	-	3458	transcribed_unprocessed_pseudogene	FK506 binding protein 9 pseudogene 1 [Source:HGNC Symbol;Acc:HGNC:23568]	-
ENSG00000152926	ZNF117	7	64971776	65006684	-	10691	protein_coding	zinc finger protein 117 [Source:HGNC Symbol;Acc:HGNC:12897]	zf-C2H2
ENSG00000177679	SRRM3	7	76201900	76287288	+	6873	protein_coding	serine/arginine repetitive matrix 3 [Source:HGNC Symbol;Acc:HGNC:26729]	-
ENSG00000164659	KIAA1324L	7	86876906	87059699	-	8115	protein_coding	KIAA1324 like [Source:HGNC Symbol;Acc:HGNC:21945]	-
ENSG00000213420	GPC2	7	100169606	100177372	-	3828	protein_coding	glypican 2 [Source:HGNC Symbol;Acc:HGNC:4450]	-
ENSG00000166924	NYAP1	7	100483927	100494799	+	3586	protein_coding	neuronal tyrosine phosphorylated phosphoinositide-3-kinase adaptor 1 [Source:HGNC Symbol;Acc:HGNC:22009]	-
ENSG00000173114	LRRN3	7	111091006	111125454	+	3875	protein_coding	leucine rich repeat neuronal 3 [Source:HGNC Symbol;Acc:HGNC:17200]	-
ENSG00000135253	KCP	7	128862451	128910719	-	8259	protein_coding	kielin/chordin-like protein [Source:HGNC Symbol;Acc:HGNC:17585]	-
ENSG00000272899	ATP6V1FNB	7	128866308	128872044	+	3902	protein_coding	ATP6V1F neighbor [Source:HGNC Symbol;Acc:HGNC:52392]	-
ENSG00000170379	TCAF2	7	143620952	143730409	+	6409	protein_coding	TRPM8 channel associated factor 2 [Source:HGNC Symbol;Acc:HGNC:26878]	-
ENSG00000239377	AC073111.1	7	150379854	150383885	-	420	antisense	novel transcript	-
ENSG00000228459	LINC01546	X	3271820	3284653	+	674	lincRNA	long intergenic non-protein coding RNA 1546 [Source:HGNC Symbol;Acc:HGNC:27336]	-
ENSG00000173681	BCLAF3	X	19912860	19970298	-	8630	protein_coding	BCLAF1 and THRAP3 family member 3 [Source:HGNC Symbol;Acc:HGNC:27413]	-
ENSG00000260822	AC004656.1	X	24545516	24550466	+	4951	sense_overlapping	novel transcript, overlapping to PDK3	-
ENSG00000226784	PGAM4	X	77968874	77969638	-	765	protein_coding	phosphoglycerate mutase family member 4 [Source:HGNC Symbol;Acc:HGNC:21731]	-
ENSG00000125354	2023-09-06	X	119615724	119693370	-	6245	protein_coding	septin 6 [Source:HGNC Symbol;Acc:HGNC:15848]	-
ENSG00000171388	APLN	X	129645259	129654937	-	3205	protein_coding	apelin [Source:HGNC Symbol;Acc:HGNC:16665]	-
ENSG00000225125	RANP4	X	136807223	136807877	-	655	processed_pseudogene	RAN, member RAS oncogene family pseudogene 4 [Source:HGNC Symbol;Acc:HGNC:39859]	-
ENSG00000179388	EGR3	8	22687659	22693302	-	4855	protein_coding	early growth response 3 [Source:HGNC Symbol;Acc:HGNC:3240]	zf-C2H2
ENSG00000233170	AC138356.2	8	37747338	37748004	-	667	processed_pseudogene	chromosome X open reading frame 56 (CXorf56) pseudogene	-
ENSG00000169122	FAM110B	8	57994509	58204279	+	4943	protein_coding	family with sequence similarity 110 member B [Source:HGNC Symbol;Acc:HGNC:28587]	-
ENSG00000213865	C8orf44	8	66667615	66685564	+	2505	protein_coding	chromosome 8 open reading frame 44 [Source:HGNC Symbol;Acc:HGNC:25646]	-
ENSG00000104313	EYA1	8	71197433	71592025	-	9418	protein_coding	EYA transcriptional coactivator and phosphatase 1 [Source:HGNC Symbol;Acc:HGNC:3519]	-
ENSG00000265657	MIR3151	8	103154614	103154689	+	76	miRNA	microRNA 3151 [Source:HGNC Symbol;Acc:HGNC:38266]	-
ENSG00000175946	KLHL38	8	123645527	123652950	-	1982	protein_coding	kelch like family member 38 [Source:HGNC Symbol;Acc:HGNC:34435]	-
ENSG00000129295	LRRC6	8	132571953	132675617	-	2778	protein_coding	leucine rich repeat containing 6 [Source:HGNC Symbol;Acc:HGNC:16725]	-
ENSG00000104415	WISP1	8	133191039	133231690	+	5190	protein_coding	WNT1 inducible signaling pathway protein 1 [Source:HGNC Symbol;Acc:HGNC:12769]	-
ENSG00000167653	PSCA	8	142670308	142682724	+	1763	protein_coding	prostate stem cell antigen [Source:HGNC Symbol;Acc:HGNC:9500]	-
ENSG00000203499	IQANK1	8	143734140	143790644	+	4982	protein_coding	IQ motif and ankyrin repeat containing 1 [Source:HGNC Symbol;Acc:HGNC:49576]	-
ENSG00000177076	ACER2	9	19409059	19452020	+	2238	protein_coding	alkaline ceramidase 2 [Source:HGNC Symbol;Acc:HGNC:23675]	-
ENSG00000169071	ROR2	9	91563091	91950162	-	5818	protein_coding	receptor tyrosine kinase like orphan receptor 2 [Source:HGNC Symbol;Acc:HGNC:10257]	-
ENSG00000157303	SUSD3	9	93058688	93085138	+	1263	protein_coding	sushi domain containing 3 [Source:HGNC Symbol;Acc:HGNC:28391]	-
ENSG00000165140	FBP1	9	94603133	94640249	-	1739	protein_coding	fructose-bisphosphatase 1 [Source:HGNC Symbol;Acc:HGNC:3606]	-
ENSG00000226334	AL359182.1	9	104927553	104928892	+	469	antisense	novel transcript	-
ENSG00000148225	WDR31	9	113313222	113340298	-	4933	protein_coding	WD repeat domain 31 [Source:HGNC Symbol;Acc:HGNC:21421]	-
ENSG00000119411	BSPRY	9	113349541	113371233	+	2339	protein_coding	B-box and SPRY domain containing [Source:HGNC Symbol;Acc:HGNC:18232]	-
ENSG00000056558	TRAF1	9	120902393	120929173	-	6449	protein_coding	TNF receptor associated factor 1 [Source:HGNC Symbol;Acc:HGNC:12031]	-
ENSG00000170835	CEL	9	133061978	133071861	+	2384	protein_coding	carboxyl ester lipase [Source:HGNC Symbol;Acc:HGNC:1848]	-
ENSG00000160271	RALGDS	9	133097720	133149334	-	7584	protein_coding	ral guanine nucleotide dissociation stimulator [Source:HGNC Symbol;Acc:HGNC:9842]	-
ENSG00000201451	RF00019	9	133337728	133337824	-	97	misc_RNA		-
ENSG00000263403	MIR4673	9	136519568	136519626	-	59	miRNA	microRNA 4673 [Source:HGNC Symbol;Acc:HGNC:41574]	-
ENSG00000185522	LMNTD2	11	554855	560779	-	2934	protein_coding	lamin tail domain containing 2 [Source:HGNC Symbol;Acc:HGNC:28561]	-
ENSG00000228661	AC090587.1	11	3854318	3855509	-	494	antisense	uncharacterized LOC105376527 [Source:NCBI gene;Acc:105376527]	-
ENSG00000245522	AC026250.1	11	9754770	9759533	-	2632	lincRNA	uncharacterized LOC440028 [Source:NCBI gene;Acc:440028]	-
ENSG00000252874	RF00019	11	47820200	47820289	-	90	misc_RNA		-
ENSG00000166793	YPEL4	11	57645087	57649944	-	4460	protein_coding	yippee like 4 [Source:HGNC Symbol;Acc:HGNC:18328]	-
ENSG00000149506	ZP1	11	60867562	60875693	+	2436	protein_coding	zona pellucida glycoprotein 1 [Source:HGNC Symbol;Acc:HGNC:13187]	-
ENSG00000162148	PPP1R32	11	61481120	61490931	+	2400	protein_coding	protein phosphatase 1 regulatory subunit 32 [Source:HGNC Symbol;Acc:HGNC:28869]	-
ENSG00000167995	BEST1	11	61949821	61965515	+	8930	protein_coding	bestrophin 1 [Source:HGNC Symbol;Acc:HGNC:12703]	-
ENSG00000214756	CSKMT	11	62665309	62668496	+	3185	protein_coding	citrate synthase lysine methyltransferase [Source:HGNC Symbol;Acc:HGNC:33113]	-
ENSG00000168000	BSCL2	11	62690275	62709845	-	3965	protein_coding	BSCL2, seipin lipid droplet biogenesis associated [Source:HGNC Symbol;Acc:HGNC:15832]	-
ENSG00000174669	SLC29A2	11	66362521	66372214	-	2720	protein_coding	solute carrier family 29 member 2 [Source:HGNC Symbol;Acc:HGNC:11004]	-
ENSG00000253024	RNU6-1238P	11	67395210	67395311	-	102	snRNA	RNA, U6 small nuclear 1238, pseudogene [Source:HGNC Symbol;Acc:HGNC:48201]	-
ENSG00000132746	ALDH3B2	11	67662162	67681200	-	3235	protein_coding	aldehyde dehydrogenase 3 family member B2 [Source:HGNC Symbol;Acc:HGNC:411]	-
ENSG00000110318	CEP126	11	101915015	102001058	+	8191	protein_coding	centrosomal protein 126 [Source:HGNC Symbol;Acc:HGNC:29264]	-
ENSG00000137745	MMP13	11	102942995	102955734	-	2834	protein_coding	matrix metallopeptidase 13 [Source:HGNC Symbol;Acc:HGNC:7159]	-
ENSG00000278768	BACE1-AS	11	117288453	117293571	+	4680	processed_transcript	BACE1 antisense RNA [Source:HGNC Symbol;Acc:HGNC:37125]	-
ENSG00000243431	RPL5P30	11	118560690	118561580	+	891	processed_pseudogene	ribosomal protein L5 pseudogene 30 [Source:HGNC Symbol;Acc:HGNC:35837]	-
ENSG00000110002	VWA5A	11	124115362	124147721	+	6403	protein_coding	von Willebrand factor A domain containing 5A [Source:HGNC Symbol;Acc:HGNC:6658]	-
ENSG00000224251	AL391427.1	10	4995488	4997380	+	482	antisense	uncharacterized LOC101928051 [Source:NCBI gene;Acc:101928051]	-
ENSG00000107485	GATA3	10	8045378	8075203	+	3436	protein_coding	GATA binding protein 3 [Source:HGNC Symbol;Acc:HGNC:4172]	zf-GATA
ENSG00000134463	ECHDC3	10	11742366	11764070	+	2185	protein_coding	enoyl-CoA hydratase domain containing 3 [Source:HGNC Symbol;Acc:HGNC:23489]	-
ENSG00000165983	PTER	10	16436943	16513745	+	4003	protein_coding	phosphotriesterase related [Source:HGNC Symbol;Acc:HGNC:9590]	-
ENSG00000226386	PARD3-AS1	10	34815767	34816386	+	302	antisense	PARD3 antisense RNA 1 [Source:HGNC Symbol;Acc:HGNC:44964]	-
ENSG00000107551	RASSF4	10	44959407	44995891	+	9481	protein_coding	Ras association domain family member 4 [Source:HGNC Symbol;Acc:HGNC:20793]	-
ENSG00000165507	DEPP1	10	44970981	44978810	-	2979	protein_coding	DEPP1, autophagy regulator [Source:HGNC Symbol;Acc:HGNC:23355]	-
ENSG00000237512	UNC5B-AS1	10	71217224	71218228	-	707	antisense	UNC5B antisense RNA 1 [Source:HGNC Symbol;Acc:HGNC:45096]	-
ENSG00000119915	ELOVL3	10	102226328	102229589	+	1371	protein_coding	ELOVL fatty acid elongase 3 [Source:HGNC Symbol;Acc:HGNC:18047]	-
ENSG00000232470	AL136368.1	10	110869743	110871594	+	401	lincRNA	novel transcript	-
ENSG00000203780	FANK1	10	125896539	126009592	+	3384	protein_coding	fibronectin type III and ankyrin repeat domains 1 [Source:HGNC Symbol;Acc:HGNC:23527]	-
ENSG00000171840	NINJ2	12	564296	663779	-	2048	protein_coding	ninjurin 2 [Source:HGNC Symbol;Acc:HGNC:7825]	-
ENSG00000250510	GPR162	12	6821545	6829972	+	3295	protein_coding	G protein-coupled receptor 162 [Source:HGNC Symbol;Acc:HGNC:16693]	-
ENSG00000139174	PRICKLE1	12	42456757	42590355	-	8247	protein_coding	prickle planar cell polarity protein 1 [Source:HGNC Symbol;Acc:HGNC:17019]	-
ENSG00000271547	AC117498.3	12	48800576	48801086	-	511	processed_pseudogene	chromosome 20 open reading frame 27 (C20orf27) pseudogene	-
ENSG00000251151	HOXC-AS3	12	53981509	53985519	-	3109	processed_transcript	HOXC cluster antisense RNA 3 [Source:HGNC Symbol;Acc:HGNC:43751]	-
ENSG00000123405	NFE2	12	54292111	54301121	-	2469	protein_coding	nuclear factor, erythroid 2 [Source:HGNC Symbol;Acc:HGNC:7780]	TF_bZIP
ENSG00000172551	MUCL1	12	54830519	54858393	+	1250	protein_coding	mucin like 1 [Source:HGNC Symbol;Acc:HGNC:30588]	-
ENSG00000258199	AC073896.4	12	56162359	56190284	-	403	sense_overlapping	novel transcript, sense overlapping to SMARCC2	-
ENSG00000185633	NDUFA4L2	12	57234903	57240715	-	2806	protein_coding	NDUFA4, mitochondrial complex associated like 2 [Source:HGNC Symbol;Acc:HGNC:29836]	-
ENSG00000155980	KIF5A	12	57549998	57586632	+	6261	protein_coding	kinesin family member 5A [Source:HGNC Symbol;Acc:HGNC:6323]	-
ENSG00000224713	AC025165.1	12	57612118	57619638	-	2600	antisense	novel transcript, antisense to ARHGEF25	-
ENSG00000135678	CPM	12	68842197	68971570	-	7535	protein_coding	carboxypeptidase M [Source:HGNC Symbol;Acc:HGNC:2311]	-
ENSG00000173451	THAP2	12	71663009	71680639	+	6527	protein_coding	THAP domain containing 2 [Source:HGNC Symbol;Acc:HGNC:20854]	THAP
ENSG00000284388	MIR4496	12	108635810	108635870	+	61	miRNA	microRNA 4496 [Source:HGNC Symbol;Acc:HGNC:41569]	-
ENSG00000122986	HVCN1	12	110627841	110704950	-	3688	protein_coding	hydrogen voltage gated channel 1 [Source:HGNC Symbol;Acc:HGNC:28240]	-
ENSG00000257817	AC026765.2	12	114713811	114767957	+	1330	lincRNA	novel transcript	-
ENSG00000089041	P2RX7	12	121132819	121188032	+	5546	protein_coding	purinergic receptor P2X 7 [Source:HGNC Symbol;Acc:HGNC:8537]	-
ENSG00000150967	ABCB9	12	122920951	122981649	-	13291	protein_coding	ATP binding cassette subfamily B member 9 [Source:HGNC Symbol;Acc:HGNC:50]	-
ENSG00000256092	AC137767.1	12	123363868	123366113	+	2246	lincRNA	novel transcript	-
ENSG00000255992	AC131009.1	12	131924736	131929351	-	426	lincRNA	novel transcript	-
ENSG00000272143	FGF14-AS2	13	102394630	102395703	+	1074	lincRNA	FGF14 antisense RNA 2 [Source:HGNC Symbol;Acc:HGNC:44368]	-
ENSG00000283828	AL137002.2	13	113149432	113154002	-	2238	antisense	WAS/WASL-interacting protein family member 2-like [Source:NCBI gene;Acc:102724474]	-
ENSG00000139835	GRTP1	13	113324164	113364148	-	2916	protein_coding	growth hormone regulated TBC protein 1 [Source:HGNC Symbol;Acc:HGNC:20310]	-
ENSG00000233695	GAS6-AS1	13	113815630	113845744	+	7169	antisense	GAS6 antisense RNA 1 [Source:HGNC Symbol;Acc:HGNC:39826]	-
ENSG00000155465	SLC7A7	14	22773222	22829820	-	5131	protein_coding	solute carrier family 7 member 7 [Source:HGNC Symbol;Acc:HGNC:11065]	-
ENSG00000258802	AL139317.2	14	52798904	52799061	-	158	processed_pseudogene	myeloma overexpressed 2 (MYEOV2) pseudogene	-
ENSG00000131979	GCH1	14	54842008	54902852	-	2951	protein_coding	GTP cyclohydrolase 1 [Source:HGNC Symbol;Acc:HGNC:4193]	-
ENSG00000139946	PELI2	14	56117814	56301526	+	6278	protein_coding	pellino E3 ubiquitin protein ligase family member 2 [Source:HGNC Symbol;Acc:HGNC:8828]	-
ENSG00000258667	HIF1A-AS2	14	61715558	61751097	-	533	lincRNA	HIF1A antisense RNA 2 [Source:HGNC Symbol;Acc:HGNC:43015]	-
ENSG00000258559	AC005519.1	14	74289127	74294425	-	1367	sense_overlapping	novel transcript, sense overlapping ABCD4	-
ENSG00000119630	PGF	14	74941834	74955784	-	5962	protein_coding	placental growth factor [Source:HGNC Symbol;Acc:HGNC:8893]	-
ENSG00000199107	MIR409	14	101065300	101065378	+	79	miRNA	microRNA 409 [Source:HGNC Symbol;Acc:HGNC:32055]	-
ENSG00000230805	AL132709.1	14	101073869	101077910	-	1283	lincRNA	novel transcript	-
ENSG00000271780	AL118558.3	14	101948347	101949425	+	1079	lincRNA	novel transcript	-
ENSG00000185100	ADSSL1	14	104724186	104747325	+	5775	protein_coding	adenylosuccinate synthase like 1 [Source:HGNC Symbol;Acc:HGNC:20093]	-
ENSG00000184916	JAG2	14	105140981	105168824	-	6397	protein_coding	jagged 2 [Source:HGNC Symbol;Acc:HGNC:6189]	-
ENSG00000207279	SNORD116-24	15	25094037	25094128	+	92	snoRNA	small nucleolar RNA, C/D box 116-24 [Source:HGNC Symbol;Acc:HGNC:33090]	-
ENSG00000256802	AC022613.1	15	29674990	29680957	+	2736	antisense	uncharacterized LOC100130111 [Source:NCBI gene;Acc:100130111]	-
ENSG00000104140	RHOV	15	40872214	40874289	-	1705	protein_coding	ras homolog family member V [Source:HGNC Symbol;Acc:HGNC:18313]	-
ENSG00000159433	STARD9	15	42575659	42720981	+	20706	protein_coding	StAR related lipid transfer domain containing 9 [Source:HGNC Symbol;Acc:HGNC:19162]	-
ENSG00000138606	SHF	15	45167214	45201175	-	4894	protein_coding	Src homology 2 domain containing F [Source:HGNC Symbol;Acc:HGNC:25116]	-
ENSG00000259712	AC023906.5	15	52056675	52100523	-	635	antisense	novel transcript, antisense to MAPK6	-
ENSG00000069667	RORA	15	60488284	61229319	-	17040	protein_coding	RAR related orphan receptor A [Source:HGNC Symbol;Acc:HGNC:10258]	THR-like
ENSG00000103710	RASL12	15	65053337	65076690	-	2802	protein_coding	RAS like family 12 [Source:HGNC Symbol;Acc:HGNC:30289]	-
ENSG00000137868	STRA6	15	74179466	74212267	-	7690	protein_coding	stimulated by retinoic acid 6 [Source:HGNC Symbol;Acc:HGNC:30650]	-
ENSG00000198794	SCAMP5	15	74957219	75021496	+	4873	protein_coding	secretory carrier membrane protein 5 [Source:HGNC Symbol;Acc:HGNC:30386]	-
ENSG00000259514	AC027243.1	15	76339609	76342063	-	758	antisense	novel transcript, antisense to ISL2	-
ENSG00000169330	KIAA1024	15	79432516	79472290	+	6800	protein_coding	KIAA1024 [Source:HGNC Symbol;Acc:HGNC:29172]	-
ENSG00000278600	AC015871.3	15	79920195	79922455	-	2261	sense_intronic	novel transcript, sense intronic to ST20	-
ENSG00000214575	CPEB1	15	82543201	82648861	-	8215	protein_coding	cytoplasmic polyadenylation element binding protein 1 [Source:HGNC Symbol;Acc:HGNC:21744]	-
ENSG00000259291	ZNF710-AS1	15	90074512	90082207	-	2902	antisense	ZNF710 antisense RNA 1 [Source:HGNC Symbol;Acc:HGNC:53141]	-
ENSG00000259363	AC090825.1	15	99807023	99877148	+	1291	lincRNA	ubiquitin conjugating enzyme E2 Q2 pseudogene [Source:NCBI gene;Acc:400464]	-
ENSG00000184254	ALDH1A3	15	100877714	100916626	+	5772	protein_coding	aldehyde dehydrogenase 1 family member A3 [Source:HGNC Symbol;Acc:HGNC:409]	-
ENSG00000261207	AL031717.1	16	1751559	1752262	-	565	antisense	novel transcript, antisense to MAPK8IP3	-
ENSG00000127561	SYNGR3	16	1989660	1994275	+	3420	protein_coding	synaptogyrin 3 [Source:HGNC Symbol;Acc:HGNC:11501]	-
ENSG00000131650	KREMEN2	16	2963944	2968383	+	2614	protein_coding	kringle containing transmembrane protein 2 [Source:HGNC Symbol;Acc:HGNC:18797]	-
ENSG00000276641	MIR6769A	16	4671318	4671390	+	73	miRNA	microRNA 6769a [Source:HGNC Symbol;Acc:HGNC:50079]	-
ENSG00000118898	PPL	16	4882507	4960741	-	7686	protein_coding	periplakin [Source:HGNC Symbol;Acc:HGNC:9273]	-
ENSG00000259807	AC009093.1	16	29217170	29220031	-	2099	lincRNA	novel transcript	-
ENSG00000149925	ALDOA	16	30064164	30070457	+	3916	protein_coding	aldolase, fructose-bisphosphate A [Source:HGNC Symbol;Acc:HGNC:414]	-
ENSG00000102886	GDPD3	16	30104810	30113856	-	1891	protein_coding	glycerophosphodiester phosphodiesterase domain containing 3 [Source:HGNC Symbol;Acc:HGNC:28638]	-
ENSG00000283689	AC018553.2	16	54285604	54289568	+	1064	antisense	novel transcript, antisense to IRX3	-
ENSG00000179044	EXOC3L1	16	67184366	67190204	-	3077	protein_coding	exocyst complex component 3 like 1 [Source:HGNC Symbol;Acc:HGNC:27540]	-
ENSG00000102984	ZNF821	16	71859680	71895336	-	3402	protein_coding	zinc finger protein 821 [Source:HGNC Symbol;Acc:HGNC:28043]	-
ENSG00000166816	LDHD	16	75111860	75116771	-	2359	protein_coding	lactate dehydrogenase D [Source:HGNC Symbol;Acc:HGNC:19708]	-
ENSG00000176692	FOXC2	16	86566829	86569728	+	2900	protein_coding	forkhead box C2 [Source:HGNC Symbol;Acc:HGNC:3801]	Fork
ENSG00000259877	AC009113.1	16	89215211	89217653	-	2443	antisense	novel transcript, antisense to ZNF778	-
ENSG00000262227	AC004771.3	17	4987706	4988446	+	551	antisense	novel transcript, antisense to INCA1	-
ENSG00000132517	SLC52A1	17	5032600	5052009	-	3934	protein_coding	solute carrier family 52 member 1 [Source:HGNC Symbol;Acc:HGNC:30225]	-
ENSG00000178977	LINC00324	17	8220642	8224043	-	2082	lincRNA	long intergenic non-protein coding RNA 324 [Source:HGNC Symbol;Acc:HGNC:26628]	-
ENSG00000167536	DHRS13	17	28897781	28903071	-	2944	protein_coding	dehydrogenase/reductase 13 [Source:HGNC Symbol;Acc:HGNC:28326]	-
ENSG00000271503	CCL5	17	35871491	35880793	-	1512	protein_coding	C-C motif chemokine ligand 5 [Source:HGNC Symbol;Acc:HGNC:10632]	-
ENSG00000108352	RAPGEFL1	17	40177010	40195656	+	5711	protein_coding	Rap guanine nucleotide exchange factor like 1 [Source:HGNC Symbol;Acc:HGNC:17428]	-
ENSG00000128422	KRT17	17	41619441	41624842	-	3130	protein_coding	keratin 17 [Source:HGNC Symbol;Acc:HGNC:6427]	-
ENSG00000267681	AC135721.1	17	43144956	43145255	+	300	transcribed_processed_pseudogene	high mobility group nucleosome binding domain 1 (HMGN1) pseudogene	-
ENSG00000108852	MPP2	17	43875357	43909711	-	6114	protein_coding	membrane palmitoylated protein 2 [Source:HGNC Symbol;Acc:HGNC:7220]	-
ENSG00000161653	NAGS	17	44004546	44009063	+	2822	protein_coding	N-acetylglutamate synthase [Source:HGNC Symbol;Acc:HGNC:17996]	-
ENSG00000267394	AC004596.1	17	44198882	44216565	+	528	antisense	novel transcript, antisense to ATXN7L3	-
ENSG00000263004	AC007114.1	17	57078298	57085024	-	855	lincRNA	novel transcript	-
ENSG00000274712	AC005332.4	17	68205489	68207493	+	2005	lincRNA	novel transcript	-
ENSG00000073350	LLGL2	17	75525080	75575208	+	7909	protein_coding	LLGL2, scribble cell polarity complex component [Source:HGNC Symbol;Acc:HGNC:6629]	-
ENSG00000132470	ITGB4	17	75721328	75757818	+	6761	protein_coding	integrin subunit beta 4 [Source:HGNC Symbol;Acc:HGNC:6158]	-
ENSG00000214140	PRCD	17	76527586	76553578	+	5305	protein_coding	photoreceptor disc component [Source:HGNC Symbol;Acc:HGNC:32528]	-
ENSG00000267543	AC015802.3	17	76549951	76550826	+	570	sense_intronic	novel transcript, sense intronic to PRCD	-
ENSG00000279692	AC110285.7	17	81395609	81397144	-	1536	TEC	TEC	-
ENSG00000176912	TYMSOS	18	641320	658340	-	976	bidirectional_promoter_lncRNA	TYMS opposite strand [Source:HGNC Symbol;Acc:HGNC:29553]	-
ENSG00000088756	ARHGAP28	18	6729718	6915716	+	11910	protein_coding	Rho GTPase activating protein 28 [Source:HGNC Symbol;Acc:HGNC:25509]	-
ENSG00000267390	AC036176.1	18	63367328	63381629	+	785	antisense	novel transcript, antisense to KDSR	-
ENSG00000277287	AL109976.1	20	3239705	3245382	+	5678	lincRNA	novel transcript	-
ENSG00000229539	AL353194.1	20	3888239	3888868	-	441	antisense	novel transcript	-
ENSG00000130684	ZNF337	20	25674215	25696841	-	3823	protein_coding	zinc finger protein 337 [Source:HGNC Symbol;Acc:HGNC:15809]	zf-C2H2
ENSG00000235313	HM13-IT1	20	31563166	31564076	+	356	sense_intronic	HM13 intronic transcript 1 [Source:HGNC Symbol;Acc:HGNC:41424]	-
ENSG00000149633	KIAA1755	20	38210488	38260772	-	8083	protein_coding	KIAA1755 [Source:HGNC Symbol;Acc:HGNC:29372]	-
ENSG00000277829	AL031651.2	20	38233251	38233799	-	549	sense_intronic	novel transcript, sense intronic to KIAA1755	-
ENSG00000222612	RNU2-52P	20	41024205	41024394	+	190	snRNA	RNA, U2 small nuclear 52, pseudogene [Source:HGNC Symbol;Acc:HGNC:48545]	-
ENSG00000124134	KCNS1	20	45092310	45101112	-	4538	protein_coding	potassium voltage-gated channel modifier subfamily S member 1 [Source:HGNC Symbol;Acc:HGNC:6300]	-
ENSG00000124212	PTGIS	20	49503874	49568146	-	5579	protein_coding	prostaglandin I2 synthase [Source:HGNC Symbol;Acc:HGNC:9603]	-
ENSG00000042062	RIPOR3	20	50586108	50691528	-	6009	protein_coding	RIPOR family member 3 [Source:HGNC Symbol;Acc:HGNC:16168]	-
ENSG00000124171	PARD6B	20	50731544	50756795	+	4726	protein_coding	par-6 family cell polarity regulator beta [Source:HGNC Symbol;Acc:HGNC:16245]	-
ENSG00000197670	AL157838.1	20	53552770	53575863	+	2502	antisense	uncharacterized LOC101927770 [Source:NCBI gene;Acc:101927770]	-
ENSG00000124224	PPP4R1L	20	58228940	58309439	-	9251	transcribed_unprocessed_pseudogene	protein phosphatase 4 regulatory subunit 1 like (pseudogene) [Source:HGNC Symbol;Acc:HGNC:15755]	-
ENSG00000277496	AL357033.4	20	62648961	62650767	-	1807	antisense	novel transcript, antisense to SLCO4A1	-
ENSG00000141934	PLPP2	19	281040	291504	-	7059	protein_coding	phospholipid phosphatase 2 [Source:HGNC Symbol;Acc:HGNC:9230]	-
ENSG00000129951	PLPPR3	19	812488	821977	-	2741	protein_coding	phospholipid phosphatase related 3 [Source:HGNC Symbol;Acc:HGNC:23497]	-
ENSG00000197561	ELANE	19	851014	856247	+	1028	protein_coding	elastase, neutrophil expressed [Source:HGNC Symbol;Acc:HGNC:3309]	-
ENSG00000104899	AMH	19	2249309	2252073	+	2587	protein_coding	anti-Mullerian hormone [Source:HGNC Symbol;Acc:HGNC:464]	-
ENSG00000188305	PEAK3	19	2274622	2282176	-	2574	protein_coding	PEAK family member 3 [Source:HGNC Symbol;Acc:HGNC:24793]	-
ENSG00000105246	EBI3	19	4229498	4237531	+	1284	protein_coding	Epstein-Barr virus induced 3 [Source:HGNC Symbol;Acc:HGNC:3129]	-
ENSG00000267370	AC008752.3	19	9756152	9756863	-	712	unprocessed_pseudogene	zinc finger protein 420 (ZNF420) pseudogene	-
ENSG00000105639	JAK3	19	17824780	17848071	-	6813	protein_coding	Janus kinase 3 [Source:HGNC Symbol;Acc:HGNC:6193]	-
ENSG00000213996	TM6SF2	19	19264364	19273391	-	2188	protein_coding	transmembrane 6 superfamily member 2 [Source:HGNC Symbol;Acc:HGNC:11861]	-
ENSG00000268521	VN1R83P	19	21289554	21289998	-	445	unprocessed_pseudogene	vomeronasal 1 receptor 83 pseudogene [Source:HGNC Symbol;Acc:HGNC:37403]	-
ENSG00000279329	AC020910.5	19	34675717	34677581	-	1865	TEC	novel transcript	-
ENSG00000271032	AC020907.4	19	35014961	35025335	-	526	antisense	novel transcript	-
ENSG00000277759	MIR6719	19	39829716	39829802	-	87	miRNA	microRNA 6719 [Source:HGNC Symbol;Acc:HGNC:50012]	-
ENSG00000223284	RNU6-195P	19	40708055	40708163	-	109	snRNA	RNA, U6 small nuclear 195, pseudogene [Source:HGNC Symbol;Acc:HGNC:47158]	-
ENSG00000233622	CYP2T1P	19	40808474	40812100	-	2871	transcribed_unitary_pseudogene	cytochrome P450 family 2 subfamily T member 1, pseudogene [Source:HGNC Symbol;Acc:HGNC:18852]	-
ENSG00000277744	AC011462.4	19	41373971	41374419	+	449	sense_intronic	novel transcript, sense intronic TMEM91	-
ENSG00000105427	CNFN	19	42387019	42390287	-	603	protein_coding	cornifelin [Source:HGNC Symbol;Acc:HGNC:30183]	-
ENSG00000105767	CADM4	19	43622368	43639839	-	2246	protein_coding	cell adhesion molecule 4 [Source:HGNC Symbol;Acc:HGNC:30825]	-
ENSG00000104783	KCNN4	19	43766533	43781261	-	3408	protein_coding	potassium calcium-activated channel subfamily N member 4 [Source:HGNC Symbol;Acc:HGNC:6293]	-
ENSG00000204920	ZNF155	19	43967862	43998325	+	3454	protein_coding	zinc finger protein 155 [Source:HGNC Symbol;Acc:HGNC:12940]	zf-C2H2
ENSG00000010310	GIPR	19	45668244	45683724	+	4736	protein_coding	gastric inhibitory polypeptide receptor [Source:HGNC Symbol;Acc:HGNC:4271]	-
ENSG00000267395	DM1-AS	19	45767796	45772504	+	1027	antisense	DM1 locus antisense RNA [Source:HGNC Symbol;Acc:HGNC:53125]	-
ENSG00000177380	PPFIA3	19	49119389	49151026	+	6451	protein_coding	PTPRF interacting protein alpha 3 [Source:HGNC Symbol;Acc:HGNC:9247]	-
ENSG00000104951	IL4I1	19	49889654	49929539	-	2563	protein_coding	interleukin 4 induced 1 [Source:HGNC Symbol;Acc:HGNC:19094]	-
ENSG00000167562	ZNF701	19	52555457	52587174	+	7201	protein_coding	zinc finger protein 701 [Source:HGNC Symbol;Acc:HGNC:25597]	zf-C2H2
ENSG00000279794	AC024580.1	19	56149817	56150490	+	674	TEC	TEC	-
ENSG00000267454	ZNF582-AS1	19	56393656	56399172	+	2037	lincRNA	ZNF582 antisense RNA 1 (head to head) [Source:HGNC Symbol;Acc:HGNC:25213]	-
ENSG00000177025	C19orf18	19	57958437	57974534	-	915	protein_coding	chromosome 19 open reading frame 18 [Source:HGNC Symbol;Acc:HGNC:28642]	-
ENSG00000100031	GGT1	22	24583750	24629005	+	4434	protein_coding	gamma-glutamyltransferase 1 [Source:HGNC Symbol;Acc:HGNC:4250]	-
ENSG00000128285	MCHR1	22	40678750	40682814	+	2961	protein_coding	melanin concentrating hormone receptor 1 [Source:HGNC Symbol;Acc:HGNC:4479]	-
ENSG00000238498	SNORD13P1	22	42076058	42076161	-	104	snoRNA	small nucleolar RNA, C/D box 13 pseudogene 1 [Source:HGNC Symbol;Acc:HGNC:10110]	-
ENSG00000266533	MIR3619	22	46091044	46091126	+	83	miRNA	microRNA 3619 [Source:HGNC Symbol;Acc:HGNC:38998]	-
ENSG00000073146	MOV10L1	22	50089879	50161690	+	6872	protein_coding	Mov10 like RISC complex RNA helicase 1 [Source:HGNC Symbol;Acc:HGNC:7201]	-
ENSG00000238390	RF01241	21	31664306	31664482	+	177	snoRNA		-
ENSG00000235123	DSCAM-AS1	21	40383083	40385358	+	1769	antisense	DSCAM antisense RNA 1 [Source:HGNC Symbol;Acc:HGNC:40197]	-

## Sheet: Cell_treated
gene_id	gene_name	gene_chr	gene_start	gene_end	gene_strand	gene_length	gene_biotype	gene_description	tf_family
ENSG00000227001	NBPF2P	1	21424625	21427967	-	661	unprocessed_pseudogene	NBPF member 2, pseudogene [Source:HGNC Symbol;Acc:HGNC:31987]	-
ENSG00000224680	PLA2G12AP1	1	52368677	52369244	+	568	processed_pseudogene	phospholipase A2 group XIIA pseudogene 1 [Source:HGNC Symbol;Acc:HGNC:39248]	-
ENSG00000278281	MIR7856	1	86357632	86357687	-	56	miRNA	microRNA 7856 [Source:HGNC Symbol;Acc:HGNC:50268]	-
ENSG00000199471	RF00019	1	202914880	202914980	-	101	misc_RNA		-
ENSG00000229657	AL391822.1	1	204946608	204947169	+	562	processed_pseudogene	ribosomal protein L13a (RPL13A) pseudogene	-
ENSG00000200033	RNU6-403P	1	221837334	221837437	-	104	snRNA	RNA, U6 small nuclear 403, pseudogene [Source:HGNC Symbol;Acc:HGNC:47366]	-
ENSG00000276334	AL133243.2	2	32521927	32523547	+	1621	sense_intronic	novel transcript, sense intronic to BIRC6	-
ENSG00000227470	AC073415.1	2	108878308	108878460	+	153	processed_pseudogene	ribosomal protein L39 (RPL39) pseudogene	-
ENSG00000266063	MIR4771-2	2	111771061	111771134	-	74	miRNA	microRNA 4771-2 [Source:HGNC Symbol;Acc:HGNC:41774]	-
ENSG00000215973	MIR933	2	175167633	175167709	-	77	miRNA	microRNA 933 [Source:HGNC Symbol;Acc:HGNC:33676]	-
ENSG00000144426	NBEAL1	2	203014879	203226378	+	16376	protein_coding	neurobeachin like 1 [Source:HGNC Symbol;Acc:HGNC:20681]	-
ENSG00000116106	EPHA4	2	221418027	221574202	-	7554	protein_coding	EPH receptor A4 [Source:HGNC Symbol;Acc:HGNC:3388]	-
ENSG00000229915	AC016999.1	2	238427077	238427729	-	452	antisense	novel transcript	-
ENSG00000264279	MIR4786	2	239943015	239943094	-	80	miRNA	microRNA 4786 [Source:HGNC Symbol;Acc:HGNC:41751]	-
ENSG00000263826	AC112907.3	3	186781780	186784179	-	2400	antisense	novel transcript, antisense to eukaryotic translation initiation factor 4A, isoform 2 EIF4A2	-
ENSG00000196083	IL1RAP	3	190514051	190659750	+	11558	protein_coding	interleukin 1 receptor accessory protein [Source:HGNC Symbol;Acc:HGNC:5995]	-
ENSG00000206601	RNU6-431P	4	108652150	108652256	+	107	snRNA	RNA, U6 small nuclear 431, pseudogene [Source:HGNC Symbol;Acc:HGNC:47394]	-
ENSG00000201176	RNU6-853P	4	168885355	168885461	+	107	snRNA	RNA, U6 small nuclear 853, pseudogene [Source:HGNC Symbol;Acc:HGNC:47816]	-
ENSG00000251880	RNU7-75P	5	37327135	37327196	+	62	snRNA	RNA, U7 small nuclear 75 pseudogene [Source:HGNC Symbol;Acc:HGNC:34171]	-
ENSG00000207129	RNA5SP187	5	88274258	88274376	-	119	rRNA_pseudogene	RNA, 5S ribosomal pseudogene 187 [Source:HGNC Symbol;Acc:HGNC:43087]	-
ENSG00000169570	DTWD2	5	118837322	118988545	-	4617	protein_coding	DTW domain containing 2 [Source:HGNC Symbol;Acc:HGNC:19334]	-
ENSG00000248927	AC114284.1	5	120781218	120790778	+	1114	lincRNA	novel transcript	-
ENSG00000222248	RNA5SP201	6	3088686	3088809	-	124	rRNA_pseudogene	RNA, 5S ribosomal pseudogene 201 [Source:HGNC Symbol;Acc:HGNC:43101]	-
ENSG00000178409	BEND3	6	107065182	107115269	-	6839	protein_coding	BEN domain containing 3 [Source:HGNC Symbol;Acc:HGNC:23040]	-
ENSG00000283409	MIR3662	6	134979338	134979432	-	95	miRNA	microRNA 3662 [Source:HGNC Symbol;Acc:HGNC:38983]	-
ENSG00000135540	NHSL1	6	138422043	138692571	-	8741	protein_coding	NHS like 1 [Source:HGNC Symbol;Acc:HGNC:21021]	-
ENSG00000218226	TATDN2P2	6	158609706	158621636	-	2226	processed_pseudogene	TatD DNase domain containing 2 pseudogene 2 [Source:HGNC Symbol;Acc:HGNC:39255]	-
ENSG00000166448	TMEM130	7	98846488	98870771	-	4663	protein_coding	transmembrane protein 130 [Source:HGNC Symbol;Acc:HGNC:25429]	-
ENSG00000207757	MIR93	7	100093768	100093847	-	80	miRNA	microRNA 93 [Source:HGNC Symbol;Acc:HGNC:31645]	-
ENSG00000284032	MIR29A	7	130876747	130876810	-	64	miRNA	microRNA 29a [Source:HGNC Symbol;Acc:HGNC:31616]	-
ENSG00000280149	AC004877.2	7	149851572	149852170	+	599	TEC	TEC	-
ENSG00000196741	LINC01560	X	47483571	47484823	+	1253	lincRNA	long intergenic non-protein coding RNA 1560 [Source:HGNC Symbol;Acc:HGNC:27333]	-
ENSG00000275882	IKBKGP1	X	154639978	154648275	-	1073	unprocessed_pseudogene	inhibitor of nuclear factor kappa B kinase subunit gamma pseudogene 1 [Source:HGNC Symbol;Acc:HGNC:24455]	-
ENSG00000274911	AL627230.2	9	67725890	67726544	+	655	unprocessed_pseudogene	family with sequence similarity 27-like (FAM27L) pseudogene	-
ENSG00000214654	B3GNT10	9	120792403	120799918	+	2516	protein_coding	UDP-GlcNAc:betaGal beta-1,3-N-acetylglucosaminyltransferase 10 (putative) [Source:HGNC Symbol;Acc:HGNC:53652]	-
ENSG00000261534	AL596244.1	9	121815674	121819452	-	3779	sense_overlapping	novel transcript, overlapping TTLL11	-
ENSG00000254595	AC084337.1	11	6488186	6489377	-	686	processed_pseudogene	voltage-dependent anion channel 1(VDAC1) pseudogene	-
ENSG00000251194	AL133330.1	11	35212550	35214007	+	704	sense_intronic	novel transcript	-
ENSG00000255121	AP003392.4	11	118994824	118998004	-	1506	lincRNA	novel transcript	-
ENSG00000228702	AL645998.1	10	45725694	45726038	-	345	processed_pseudogene	novel pseudogene	-
ENSG00000238405	RNA5SP311	10	46807458	46807573	-	116	rRNA_pseudogene	RNA, 5S ribosomal pseudogene 311 [Source:HGNC Symbol;Acc:HGNC:43211]	-
ENSG00000264610	MIR4685	10	98431292	98431360	-	69	miRNA	microRNA 4685 [Source:HGNC Symbol;Acc:HGNC:41802]	-
ENSG00000256843	AC023157.2	12	31748100	31748240	-	141	processed_pseudogene	dpy-30 homolog (C. elegans) (DPY30) pseudogene	-
ENSG00000256083	AC090673.2	12	65934777	65948479	-	454	antisense	novel transcript, antisense to HMGA2	-
ENSG00000239335	LLPH-DT	12	66130751	66134449	+	623	antisense	LLPH divergent transcript [Source:HGNC Symbol;Acc:HGNC:50493]	-
ENSG00000277595	AC007546.1	12	110032245	110032803	+	559	sense_intronic	novel transcript, sense intronic to ANKRD13A	-
ENSG00000232888	RPS11P5	12	132825701	132826184	+	484	processed_pseudogene	ribosomal protein S11 pseudogene 5 [Source:HGNC Symbol;Acc:HGNC:36312]	-
ENSG00000278009	AL139099.3	14	49601011	49601124	-	114	unprocessed_pseudogene	phosphatidylinositol glycan anchor biosynthesis, class F (PIGF) pseudogene	-
ENSG00000201573	RF00019	14	50468397	50468498	-	102	misc_RNA		-
ENSG00000207001	SNORD116-2	15	25054210	25054304	+	95	snoRNA	small nucleolar RNA, C/D box 116-2 [Source:HGNC Symbol;Acc:HGNC:33068]	-
ENSG00000259287	AC010809.1	15	33858602	33864825	-	562	antisense	novel transcript, antisense to RYR3	-
ENSG00000281183	NPTN-IT1	15	73567012	73569294	-	2283	sense_intronic	NPTN intronic transcript 1 [Source:HGNC Symbol;Acc:HGNC:45091]	-
ENSG00000260367	AC109460.1	16	28973962	28978824	-	1478	antisense	novel transcript, antisense to SPNS1	-
ENSG00000252026	RNU6-1262P	16	68284223	68284318	-	96	snRNA	RNA, U6 small nuclear 1262, pseudogene [Source:HGNC Symbol;Acc:HGNC:48225]	-
ENSG00000265511	AC020558.2	17	17507351	17508308	+	795	antisense	novel transcript	-
ENSG00000267648	AC060766.5	17	35406948	35407818	-	871	transcribed_processed_pseudogene	DTW domain containing 2 (DTWD2) pseudogene	-
ENSG00000277057	MIR6779	17	38914979	38915042	+	64	miRNA	microRNA 6779 [Source:HGNC Symbol;Acc:HGNC:50148]	-
ENSG00000279989	AC011815.3	18	35257040	35257512	+	473	TEC	TEC	-
ENSG00000075643	MOCOS	18	36187519	36272157	+	6281	protein_coding	molybdenum cofactor sulfurase [Source:HGNC Symbol;Acc:HGNC:18234]	-
ENSG00000176225	RTTN	18	70003031	70205945	-	19323	protein_coding	rotatin [Source:HGNC Symbol;Acc:HGNC:18654]	-
ENSG00000252367	RF00019	20	5113993	5114083	-	91	misc_RNA		-
ENSG00000282870	FRG1DP	20	29080390	29102761	+	771	unprocessed_pseudogene	FSHD region gene 1 family member D, pseudogene [Source:HGNC Symbol;Acc:HGNC:51763]	-
ENSG00000087589	CASS4	20	56412112	56460387	+	5069	protein_coding	Cas scaffold protein family member 4 [Source:HGNC Symbol;Acc:HGNC:15878]	-
ENSG00000268941	LINC01711	20	58634772	58635738	+	967	lincRNA	long intergenic non-protein coding RNA 1711 [Source:HGNC Symbol;Acc:HGNC:28663]	-
ENSG00000267201	LINC01775	19	2458935	2462185	-	371	lincRNA	long intergenic non-protein coding RNA 1775 [Source:HGNC Symbol;Acc:HGNC:52565]	-
ENSG00000280239	AC011498.7	19	4448810	4450836	+	2027	TEC	TEC	-
ENSG00000269019	HOMER3-AS1	19	18940322	18946831	+	957	antisense	HOMER3 antisense RNA 1 [Source:HGNC Symbol;Acc:HGNC:53775]	-
ENSG00000267886	AC074135.1	19	23075201	23100361	+	967	lincRNA	zinc finger protein 730 [Source:NCBI gene;Acc:100129543]	-
ENSG00000197372	ZNF675	19	23525631	23687220	-	6785	protein_coding	zinc finger protein 675 [Source:HGNC Symbol;Acc:HGNC:30768]	zf-C2H2
ENSG00000128000	ZNF780B	19	40028260	40056209	-	9217	protein_coding	zinc finger protein 780B [Source:HGNC Symbol;Acc:HGNC:33109]	zf-C2H2
ENSG00000256294	ZNF225	19	44112181	44134816	+	7226	protein_coding	zinc finger protein 225 [Source:HGNC Symbol;Acc:HGNC:13018]	zf-C2H2
ENSG00000211513	MIR320E	19	46709293	46709345	-	53	miRNA	microRNA 320e [Source:HGNC Symbol;Acc:HGNC:38230]	-
ENSG00000207073	RF00019	19	49566672	49566772	+	101	misc_RNA		-
ENSG00000142396	ERVK3-1	19	58305319	58315663	+	5023	protein_coding	endogenous retrovirus group K3 member 1 [Source:HGNC Symbol;Acc:HGNC:30466]	-
ENSG00000285531	Z83840.1	22	41676745	41677125	-	381	processed_pseudogene	LLP homolog, long-term synaptic facilitation ( LLPH) pseudogene	-
ENSG00000233903	Z83851.1	22	42276355	42277052	+	545	lincRNA	novel transcript	-
ENSG00000274276	CBSL	21	6444869	6468040	-	4004	protein_coding	cystathionine-beta-synthase like [Source:HGNC Symbol;Acc:HGNC:51829]	-
ENSG00000275895	U2AF1L5	21	6484623	6499261	-	11119	protein_coding	U2 small nuclear RNA auxiliary factor 1 like 5 [Source:HGNC Symbol;Acc:HGNC:51830]	-
ENSG00000276700	RNA5-8SN2	KI270733.1	128877	129029	+	153	rRNA	RNA, 5.8S ribosomal N2 [Source:HGNC Symbol;Acc:HGNC:53521]	-

## Sheet: Flu_treated
gene_id	gene_name	gene_chr	gene_start	gene_end	gene_strand	gene_length	gene_biotype	gene_description	tf_family
ENSG00000223263	RNU6-387P	1	67417214	67417318	+	105	snRNA	RNA, U6 small nuclear 387, pseudogene [Source:HGNC Symbol;Acc:HGNC:47350]	-
ENSG00000137959	IFI44L	1	78619922	78646145	+	10240	protein_coding	interferon induced protein 44 like [Source:HGNC Symbol;Acc:HGNC:17817]	-
ENSG00000156875	MFSD14A	1	100038097	100083377	+	2943	protein_coding	major facilitator superfamily domain containing 14A [Source:HGNC Symbol;Acc:HGNC:23363]	-
ENSG00000143126	CELSR2	1	109250019	109275750	+	12349	protein_coding	cadherin EGF LAG seven-pass G-type receptor 2 [Source:HGNC Symbol;Acc:HGNC:3231]	-
ENSG00000143556	S100A7	1	153457744	153460701	-	536	protein_coding	S100 calcium binding protein A7 [Source:HGNC Symbol;Acc:HGNC:10497]	-
ENSG00000270084	GAS5-AS1	1	173863248	173863941	+	694	antisense	GAS5 antisense RNA 1 [Source:HGNC Symbol;Acc:HGNC:44119]	-
ENSG00000174529	TMEM81	1	205083129	205084460	-	1332	protein_coding	transmembrane protein 81 [Source:HGNC Symbol;Acc:HGNC:32349]	-
ENSG00000212916	MAP10	1	232804892	232808407	+	3516	protein_coding	microtubule associated protein 10 [Source:HGNC Symbol;Acc:HGNC:29265]	-
ENSG00000119778	ATAD2B	2	23748664	23927114	-	10492	protein_coding	ATPase family, AAA domain containing 2B [Source:HGNC Symbol;Acc:HGNC:29230]	-
ENSG00000231584	FAHD2CP	2	96010551	96023380	+	2140	transcribed_unprocessed_pseudogene	fumarylacetoacetate hydrolase domain containing 2C, pseudogene [Source:HGNC Symbol;Acc:HGNC:44135]	-
ENSG00000272861	AC012360.2	2	105249404	105249794	-	391	lincRNA	novel transcript	-
ENSG00000121964	GTDC1	2	143938068	144332568	-	14162	protein_coding	glycosyltransferase like domain containing 1 [Source:HGNC Symbol;Acc:HGNC:20887]	-
ENSG00000244124	ATP1B3-AS1	3	141918252	141919021	-	376	antisense	ATP1B3 antisense RNA 1 [Source:HGNC Symbol;Acc:HGNC:40088]	-
ENSG00000163536	SERPINI1	3	167735243	167825568	+	2418	protein_coding	serpin family I member 1 [Source:HGNC Symbol;Acc:HGNC:8943]	-
ENSG00000253092	RF01241	3	183452567	183452764	+	198	snoRNA		-
ENSG00000249592	AC139887.2	4	762387	781849	-	1575	antisense	uncharacterized LOC100129917 [Source:NCBI gene;Acc:100129917]	-
ENSG00000068078	FGFR3	4	1793293	1808872	+	4848	protein_coding	fibroblast growth factor receptor 3 [Source:HGNC Symbol;Acc:HGNC:3690]	-
ENSG00000207944	MIR574	4	38868032	38868127	+	96	miRNA	microRNA 574 [Source:HGNC Symbol;Acc:HGNC:32830]	-
ENSG00000270257	AC096720.1	4	67638177	67638359	+	183	processed_pseudogene	small EDRK-rich factor 2 (SERF2) pseudogene	-
ENSG00000138646	HERC5	4	88457117	88506163	+	4766	protein_coding	HECT and RLD domain containing E3 ubiquitin protein ligase 5 [Source:HGNC Symbol;Acc:HGNC:24368]	-
ENSG00000246560	AC018797.2	4	102828055	102844075	+	883	antisense	uncharacterized LOC105377348 [Source:NCBI gene;Acc:105377348]	-
ENSG00000198237	AC131392.1	5	69875271	69920867	+	633	unprocessed_pseudogene	glucuronidase, beta (GUSB) pseudogene	-
ENSG00000247828	TMEM161B-AS1	5	88268895	88436685	+	4439	antisense	TMEM161B antisense RNA 1 [Source:HGNC Symbol;Acc:HGNC:43839]	-
ENSG00000175471	MCTP1	5	94703741	95284575	-	12089	protein_coding	multiple C2 and transmembrane domain containing 1 [Source:HGNC Symbol;Acc:HGNC:26183]	-
ENSG00000263432	RN7SL689P	5	123022487	123022783	-	297	misc_RNA	RNA, 7SL, cytoplasmic 689, pseudogene [Source:HGNC Symbol;Acc:HGNC:46705]	-
ENSG00000112981	NME5	5	138115172	138139443	-	2392	protein_coding	NME/NM23 family member 5 [Source:HGNC Symbol;Acc:HGNC:7853]	-
ENSG00000170458	CD14	5	140631728	140633701	-	1886	protein_coding	CD14 molecule [Source:HGNC Symbol;Acc:HGNC:1628]	-
ENSG00000272112	AC011374.2	5	151724831	151725356	-	526	lincRNA	novel transcript	-
ENSG00000112294	ALDH5A1	6	24494852	24537207	+	5525	protein_coding	aldehyde dehydrogenase 5 family member A1 [Source:HGNC Symbol;Acc:HGNC:408]	-
ENSG00000219891	ZSCAN12P1	6	28091154	28093664	+	1657	transcribed_unprocessed_pseudogene	zinc finger and SCAN domain containing 12 pseudogene 1 [Source:HGNC Symbol;Acc:HGNC:13850]	-
ENSG00000204428	LY6G5C	6	31676684	31684040	-	2621	protein_coding	lymphocyte antigen 6 family member G5C [Source:HGNC Symbol;Acc:HGNC:13932]	-
ENSG00000272217	AL645940.1	6	33246075	33246856	-	594	lincRNA	uncharacterized LOC105375022 [Source:NCBI gene;Acc:105375022]	-
ENSG00000276712	MIR7111	6	35470508	35470579	+	72	miRNA	microRNA 7111 [Source:HGNC Symbol;Acc:HGNC:50073]	-
ENSG00000146776	ATXN7L1	7	105605067	105876604	-	8295	protein_coding	ataxin 7 like 1 [Source:HGNC Symbol;Acc:HGNC:22210]	-
ENSG00000008311	AASS	7	122075647	122144280	-	4591	protein_coding	aminoadipate-semialdehyde synthase [Source:HGNC Symbol;Acc:HGNC:17366]	-
ENSG00000198205	ZXDA	X	57906708	57910820	-	4113	protein_coding	zinc finger X-linked duplicated A [Source:HGNC Symbol;Acc:HGNC:13198]	zf-C2H2
ENSG00000254348	AC120036.3	8	47189305	47189560	+	256	processed_pseudogene	patched homolog 1 (Drosophila) (PTCH1) pseudogene	-
ENSG00000066827	ZFAT	8	134477788	134713049	-	8900	protein_coding	zinc finger and AT-hook domain containing [Source:HGNC Symbol;Acc:HGNC:19899]	zf-C2H2
ENSG00000127081	ZNF484	9	92845031	92878038	-	4031	protein_coding	zinc finger protein 484 [Source:HGNC Symbol;Acc:HGNC:23385]	zf-C2H2
ENSG00000207563	MIR23B	9	95085208	95085304	+	97	miRNA	microRNA 23b [Source:HGNC Symbol;Acc:HGNC:31606]	-
ENSG00000207864	MIR27B	9	95085445	95085541	+	97	miRNA	microRNA 27b [Source:HGNC Symbol;Acc:HGNC:31614]	-
ENSG00000231465	AL359636.2	9	122471358	122475817	+	259	antisense	novel transcript	-
ENSG00000165209	STRBP	9	123109500	123268576	-	8097	protein_coding	spermatid perinuclear RNA binding protein [Source:HGNC Symbol;Acc:HGNC:16462]	-
ENSG00000278952	AP003068.4	11	65118310	65119111	+	802	TEC	TEC	-
ENSG00000230397	SPTLC1P1	10	31360955	31361215	+	261	transcribed_processed_pseudogene	serine palmitoyltransferase long chain base subunit 1 pseudogene 1 [Source:HGNC Symbol;Acc:HGNC:39668]	-
ENSG00000256894	AC022509.3	12	26125155	26126617	-	826	antisense	novel transcript, antisense to SSPN	-
ENSG00000151743	AMN1	12	31671137	31729174	-	3195	protein_coding	antagonist of mitotic exit network 1 homolog [Source:HGNC Symbol;Acc:HGNC:27281]	-
ENSG00000278108	MIR6757	12	53056944	53057012	+	69	miRNA	microRNA 6757 [Source:HGNC Symbol;Acc:HGNC:50160]	-
ENSG00000110944	IL23A	12	56334174	56340410	+	1187	protein_coding	interleukin 23 subunit alpha [Source:HGNC Symbol;Acc:HGNC:15488]	-
ENSG00000171310	CHST11	12	104455295	104762014	+	6492	protein_coding	carbohydrate sulfotransferase 11 [Source:HGNC Symbol;Acc:HGNC:17422]	-
ENSG00000089127	OAS1	12	112906777	112933222	+	4947	protein_coding	2'-5'-oligoadenylate synthetase 1 [Source:HGNC Symbol;Acc:HGNC:8086]	-
ENSG00000139508	SLC46A3	13	28700064	28718970	-	3776	protein_coding	solute carrier family 46 member 3 [Source:HGNC Symbol;Acc:HGNC:27501]	-
ENSG00000151773	CCDC122	13	43823909	43879727	-	5403	protein_coding	coiled-coil domain containing 122 [Source:HGNC Symbol;Acc:HGNC:26478]	-
ENSG00000100890	KIAA0391	14	35121846	35277614	+	6982	protein_coding	KIAA0391 [Source:HGNC Symbol;Acc:HGNC:19958]	-
ENSG00000168282	MGAT2	14	49620795	49623481	+	2687	protein_coding	mannosyl (alpha-1,6-)-glycoprotein beta-1,2-N-acetylglucosaminyltransferase [Source:HGNC Symbol;Acc:HGNC:7045]	-
ENSG00000278771	RN7SL3	14	49853616	49853914	-	299	misc_RNA	RNA, 7SL, cytoplasmic 3 [Source:HGNC Symbol;Acc:HGNC:23135]	-
ENSG00000248079	DPH6-DT	15	35546195	35859001	+	1531	lincRNA	DPH6 divergent transcript [Source:HGNC Symbol;Acc:HGNC:44147]	-
ENSG00000266589	MIR4512	15	66496958	66497034	-	77	miRNA	microRNA 4512 [Source:HGNC Symbol;Acc:HGNC:41701]	-
ENSG00000182253	SYNM	15	99098217	99135593	+	7819	protein_coding	synemin [Source:HGNC Symbol;Acc:HGNC:24466]	-
ENSG00000005001	PRSS22	16	2852727	2858170	-	2387	protein_coding	serine protease 22 [Source:HGNC Symbol;Acc:HGNC:14368]	-
ENSG00000258947	TUBB3	16	89921392	89938761	+	4430	protein_coding	tubulin beta 3 class III [Source:HGNC Symbol;Acc:HGNC:20772]	-
ENSG00000234327	AC012146.1	17	5111468	5115004	+	2006	processed_transcript	uncharacterized LOC101928000 [Source:NCBI gene;Acc:101928000]	-
ENSG00000132522	GPS2	17	7311324	7315564	-	3089	protein_coding	G protein pathway suppressor 2 [Source:HGNC Symbol;Acc:HGNC:4550]	-
ENSG00000248278	SUMO2P17	17	48874860	48908983	-	897	transcribed_processed_pseudogene	SUMO2 pseudogene 17 [Source:HGNC Symbol;Acc:HGNC:49358]	-
ENSG00000154240	CEP112	17	65635538	66192084	-	7849	protein_coding	centrosomal protein 112 [Source:HGNC Symbol;Acc:HGNC:28514]	-
ENSG00000262580	AC087741.1	17	80200673	80205949	-	5122	antisense	novel transcript, antisense to CARD14	-
ENSG00000166510	CCDC68	18	54901509	54959508	-	5180	protein_coding	coiled-coil domain containing 68 [Source:HGNC Symbol;Acc:HGNC:24350]	-
ENSG00000212536	RNA5SP474	20	5098387	5098476	-	90	rRNA_pseudogene	RNA, 5S ribosomal pseudogene 474 [Source:HGNC Symbol;Acc:HGNC:43374]	-
ENSG00000115266	APC2	19	1446302	1473244	+	12610	protein_coding	APC2, WNT signaling pathway regulator [Source:HGNC Symbol;Acc:HGNC:24036]	-
ENSG00000261342	AC006538.1	19	2727743	2729327	-	1585	sense_intronic	novel transcript	-
ENSG00000206775	SNORD37	19	3982507	3982572	-	66	snoRNA	small nucleolar RNA, C/D box 37 [Source:HGNC Symbol;Acc:HGNC:10166]	-
ENSG00000141854	MISP3	19	14072536	14075062	+	2354	protein_coding	MISP family member 3 [Source:HGNC Symbol;Acc:HGNC:26963]	-
ENSG00000269439	AC010618.3	19	17488990	17511889	-	2067	lincRNA	novel transcript	-
ENSG00000267565	AC011477.3	19	19892433	19895847	-	403	antisense	novel transcript, antisense to ZNF253	-
ENSG00000153896	ZNF599	19	34758076	34773229	-	6796	protein_coding	zinc finger protein 599 [Source:HGNC Symbol;Acc:HGNC:26408]	zf-C2H2
ENSG00000018869	ZNF582	19	56375846	56393545	-	3350	protein_coding	zinc finger protein 582 [Source:HGNC Symbol;Acc:HGNC:26421]	zf-C2H2
ENSG00000206739	RF00019	22	19045256	19045367	+	112	misc_RNA		-
ENSG00000240972	MIF	22	23894004	23895227	+	1109	protein_coding	macrophage migration inhibitory factor [Source:HGNC Symbol;Acc:HGNC:7097]	-
ENSG00000167065	DUSP18	22	30652051	30667890	-	4450	protein_coding	dual specificity phosphatase 18 [Source:HGNC Symbol;Acc:HGNC:18484]	-
ENSG00000281538	AC254562.3	22	42138060	42139726	+	631	lincRNA	novel transcript	-
