# Supplementary material for: Transcriptome Analysis of Human Dermal Cells Infected with Candida auris Identified Unique Pathogenesis/Defensive Mechanisms Particularly Ferroptosis
Source: Springer Nature journal article supplement (doi:10.1007/s11046-024-00868-9), 2024-07-11
Supplement: MOESM2 [file 11046_2024_868_MOESM2_ESM.xlsx]

## Sheet: cluster1_heatmap_group
gene_id	Flu_treated	Control	Casp_treated	Bio_treated	Cell_treated	gene_name	gene_chr	gene_start	gene_end	gene_strand	gene_length	gene_biotype	gene_description	tf_family
ENSG00000112096	32.1202	4.54066	39.2622	7.13706	5.92217	SOD2	6	159669057	159745186	-	16493	protein_coding	superoxide dismutase 2 [Source:HGNC Symbol;Acc:HGNC:11180]	-
ENSG00000180914	1.48643	34.6942	1.86662	32.2409	34.1852	OXTR	3	8750408	8769628	-	4514	protein_coding	oxytocin receptor [Source:HGNC Symbol;Acc:HGNC:8529]	-
ENSG00000181751	5.01595	50.5966	4.33472	51.0609	56.3727	C5orf30	5	103258702	103278660	+	3568	protein_coding	chromosome 5 open reading frame 30 [Source:HGNC Symbol;Acc:HGNC:25052]	-
ENSG00000131389	96.2692	19.2864	130.508	24.5279	25.8054	SLC6A6	3	14402576	14489349	+	8254	protein_coding	solute carrier family 6 member 6 [Source:HGNC Symbol;Acc:HGNC:11052]	-
ENSG00000149591	57.4677	382.826	87.4601	476.497	370.89	TAGLN	11	117199321	117204782	+	3917	protein_coding	transgelin [Source:HGNC Symbol;Acc:HGNC:11553]	-
ENSG00000131747	3.79533	26.9751	3.49144	14.2523	25.335	TOP2A	17	40388516	40417950	-	6437	protein_coding	DNA topoisomerase II alpha [Source:HGNC Symbol;Acc:HGNC:11989]	-
ENSG00000142871	81.0093	452.701	25.9717	448.565	482.722	CYR61	1	85580761	85583962	+	2455	protein_coding	cysteine rich angiogenic inducer 61 [Source:HGNC Symbol;Acc:HGNC:2654]	-
ENSG00000144583	3.12071	26.5736	2.03029	17.9421	24.5296	2023-03-04	2	216257865	216372027	-	4447	protein_coding	membrane associated ring-CH-type finger 4 [Source:HGNC Symbol;Acc:HGNC:29269]	-
ENSG00000169429	42.8399	1.35208	71.0014	5.86921	3.45422	CXCL8	4	73740506	73743716	+	2274	protein_coding	C-X-C motif chemokine ligand 8 [Source:HGNC Symbol;Acc:HGNC:6025]	-
ENSG00000276043	2.41163	23.6078	2.34851	16.641	20.2575	UHRF1	19	4903080	4962154	+	5145	protein_coding	ubiquitin like with PHD and ring finger domains 1 [Source:HGNC Symbol;Acc:HGNC:12556]	-
ENSG00000137807	1.0888	12.8619	1.17117	8.23375	11.8009	KIF23	15	69414246	69448427	+	6576	protein_coding	kinesin family member 23 [Source:HGNC Symbol;Acc:HGNC:6392]	-
ENSG00000107796	22.0313	168.397	35.1099	201.665	178.191	ACTA2	10	88935074	88991339	-	2976	protein_coding	actin, alpha 2, smooth muscle, aorta [Source:HGNC Symbol;Acc:HGNC:130]	-
ENSG00000138623	10.8035	57.7061	11.1388	47.1971	53.3556	SEMA7A	15	74409289	74433958	-	3800	protein_coding	semaphorin 7A (John Milton Hagen blood group) [Source:HGNC Symbol;Acc:HGNC:10741]	-
ENSG00000171848	1.07922	14.3689	0.992606	9.59808	13.0086	RRM2	2	10120698	10131419	+	5323	protein_coding	ribonucleotide reductase regulatory subunit M2 [Source:HGNC Symbol;Acc:HGNC:10452]	-
ENSG00000117525	4.17674	37.4585	6.90938	56.316	44.9671	F3	1	94529225	94541800	-	2875	protein_coding	coagulation factor III, tissue factor [Source:HGNC Symbol;Acc:HGNC:3541]	-
ENSG00000117399	2.65602	34.9564	1.83845	23.6154	28.485	CDC20	1	43358955	43363203	+	2038	protein_coding	cell division cycle 20 [Source:HGNC Symbol;Acc:HGNC:1723]	-
ENSG00000088325	4.46837	29.3041	4.20945	18.952	27.4308	TPX2	20	31739271	31801805	+	3605	protein_coding	TPX2, microtubule nucleation factor [Source:HGNC Symbol;Acc:HGNC:1249]	-
ENSG00000157601	10.0856	0.43607	6.91773	0.440109	0.487457	MX1	21	41420304	41459214	+	8616	protein_coding	MX dynamin like GTPase 1 [Source:HGNC Symbol;Acc:HGNC:7532]	-
ENSG00000148773	0.636618	7.16816	0.615802	3.89225	6.49699	MKI67	10	128096659	128126385	-	12807	protein_coding	marker of proliferation Ki-67 [Source:HGNC Symbol;Acc:HGNC:7107]	-
ENSG00000011426	2.21688	24.156	1.59892	13.3396	23.1363	ANLN	7	36389806	36453791	+	6012	protein_coding	anillin actin binding protein [Source:HGNC Symbol;Acc:HGNC:14082]	-
ENSG00000169213	5.38509	21.7404	7.16749	17.1063	21.0332	RAB3B	1	51907956	51990764	-	12844	protein_coding	RAB3B, member RAS oncogene family [Source:HGNC Symbol;Acc:HGNC:9778]	-
ENSG00000128567	2.34053	17.2508	2.67996	10.3013	15.8614	PODXL	7	131500262	131558217	-	6874	protein_coding	podocalyxin like [Source:HGNC Symbol;Acc:HGNC:9171]	-
ENSG00000137310	2.86198	22.8961	2.6403	15.5952	19.9212	TCF19	6	31158542	31167159	+	3538	protein_coding	transcription factor 19 [Source:HGNC Symbol;Acc:HGNC:11629]	Others
ENSG00000103888	3.16902	30.9342	19.7115	26.6658	35.4133	CEMIP	15	80779343	80951776	+	7621	protein_coding	cell migration inducing hyaluronidase 1 [Source:HGNC Symbol;Acc:HGNC:29213]	-
ENSG00000104081	15.3897	1.74613	32.9015	3.19263	2.13246	BMF	15	40087890	40108892	-	5447	protein_coding	Bcl2 modifying factor [Source:HGNC Symbol;Acc:HGNC:24132]	-
ENSG00000174136	4.79892	28.2014	6.57858	28.9998	33.4205	RGMB	5	98768650	98798643	+	6671	protein_coding	repulsive guidance molecule BMP co-receptor b [Source:HGNC Symbol;Acc:HGNC:26896]	-
ENSG00000175899	1.04085	9.55323	1.52228	10.1568	10.9466	A2M	12	9067664	9116229	-	6384	protein_coding	alpha-2-macroglobulin [Source:HGNC Symbol;Acc:HGNC:7]	-
ENSG00000183856	0.617378	8.25524	0.918836	3.80996	6.62651	IQGAP3	1	156525405	156572604	-	6742	protein_coding	IQ motif containing GTPase activating protein 3 [Source:HGNC Symbol;Acc:HGNC:20669]	-
ENSG00000171241	1.14942	13.2286	1.18246	8.80643	11.206	SHCBP1	16	46580554	46621626	-	4459	protein_coding	SHC binding and spindle associated 1 [Source:HGNC Symbol;Acc:HGNC:29547]	-
ENSG00000167900	5.37536	42.0991	7.47899	38.246	35.3064	TK1	17	78174075	78187233	-	1861	protein_coding	thymidine kinase 1 [Source:HGNC Symbol;Acc:HGNC:11830]	-
ENSG00000107984	44.6623	265.625	79.1715	349.812	253.596	DKK1	10	52314296	52318042	+	2206	protein_coding	dickkopf WNT signaling pathway inhibitor 1 [Source:HGNC Symbol;Acc:HGNC:2891]	-
ENSG00000185697	1.36122	10.8653	0.946045	8.36548	10.3939	MYBL1	8	66562175	66614247	-	7239	protein_coding	MYB proto-oncogene like 1 [Source:HGNC Symbol;Acc:HGNC:7547]	MYB
ENSG00000127564	0.932156	11.2028	1.12228	9.48265	9.70364	PKMYT1	16	2968024	2980539	-	5034	protein_coding	protein kinase, membrane associated tyrosine/threonine 1 [Source:HGNC Symbol;Acc:HGNC:29650]	-
ENSG00000140416	34.4806	136.912	42.5115	171	158.268	TPM1	15	63042632	63071915	+	12876	protein_coding	tropomyosin 1 [Source:HGNC Symbol;Acc:HGNC:12010]	-
ENSG00000013810	2.12617	13.6018	1.94024	11.0347	11.6754	TACC3	4	1721490	1745176	+	6528	protein_coding	transforming acidic coiled-coil containing protein 3 [Source:HGNC Symbol;Acc:HGNC:11524]	-
ENSG00000179820	31.4737	98.7558	48.6037	92.8092	96.2392	MYADM	19	53866223	53876437	+	3675	protein_coding	myeloid associated differentiation marker [Source:HGNC Symbol;Acc:HGNC:7544]	-
ENSG00000166508	8.35363	36.2067	17.0962	27.6278	28.4607	MCM7	7	100092728	100101940	-	4386	protein_coding	minichromosome maintenance complex component 7 [Source:HGNC Symbol;Acc:HGNC:6950]	-
ENSG00000235162	61.1521	238.724	58.5386	245.507	215.422	C12orf75	12	105235290	105396097	+	2693	protein_coding	chromosome 12 open reading frame 75 [Source:HGNC Symbol;Acc:HGNC:35164]	-
ENSG00000163110	2.67122	11.0373	1.38765	8.69073	10.9185	PDLIM5	4	94451857	94668227	+	11090	protein_coding	PDZ and LIM domain 5 [Source:HGNC Symbol;Acc:HGNC:17468]	-
ENSG00000113368	1.89702	16.2295	2.13727	10.5016	15.3615	LMNB1	5	126776623	126837020	+	3633	protein_coding	lamin B1 [Source:HGNC Symbol;Acc:HGNC:6637]	-
ENSG00000089685	1.69815	13.5104	1.45081	11.1076	11.8743	BIRC5	17	78214186	78225636	+	3815	protein_coding	baculoviral IAP repeat containing 5 [Source:HGNC Symbol;Acc:HGNC:593]	-
ENSG00000163739	35.9101	1.07925	43.999	5.34093	3.52117	CXCL1	4	73869393	73871242	+	1296	protein_coding	C-X-C motif chemokine ligand 1 [Source:HGNC Symbol;Acc:HGNC:4602]	-
ENSG00000165092	13.682	60.4344	17.6439	92.397	73.0096	ALDH1A1	9	72900662	73080442	-	2849	protein_coding	aldehyde dehydrogenase 1 family member A1 [Source:HGNC Symbol;Acc:HGNC:402]	-
ENSG00000107731	67.0705	22.2452	71.7864	28.0968	29.1698	UNC5B	10	71212570	71302864	+	6841	protein_coding	unc-5 netrin receptor B [Source:HGNC Symbol;Acc:HGNC:12568]	-
ENSG00000137936	4.02303	17.3242	3.22922	13.3645	14.3392	BCAR3	1	93561786	93847150	-	6866	protein_coding	BCAR3, NSP family adaptor protein [Source:HGNC Symbol;Acc:HGNC:973]	-
ENSG00000148344	42.7342	7.26614	55.9377	11.2883	9.03697	PTGES	9	129738331	129753047	-	1896	protein_coding	prostaglandin E synthase [Source:HGNC Symbol;Acc:HGNC:9599]	-
ENSG00000075702	0.488913	4.80877	0.464867	3.17895	3.74887	WDR62	19	36054881	36105106	+	9812	protein_coding	WD repeat domain 62 [Source:HGNC Symbol;Acc:HGNC:24502]	-
ENSG00000111186	26.4214	78.5486	20.8614	79.8685	70.7129	WNT5B	12	1529891	1647243	+	4305	protein_coding	Wnt family member 5B [Source:HGNC Symbol;Acc:HGNC:16265]	-
ENSG00000109685	1.92601	7.43595	1.88207	4.76245	6.78485	NSD2	4	1871424	1982207	+	19776	protein_coding	nuclear receptor binding SET domain protein 2 [Source:HGNC Symbol;Acc:HGNC:12766]	HMG
ENSG00000100297	3.15032	14.6449	3.53656	10.7478	12.8661	MCM5	22	35400063	35425430	+	7338	protein_coding	minichromosome maintenance complex component 5 [Source:HGNC Symbol;Acc:HGNC:6948]	-
ENSG00000110880	30.8633	79.3171	30.0671	67.754	78.8326	CORO1C	12	108645109	108731596	-	6532	protein_coding	coronin 1C [Source:HGNC Symbol;Acc:HGNC:2254]	-
ENSG00000094804	0.886185	9.16204	0.790579	6.39532	8.01941	CDC6	17	40287633	40304657	+	5557	protein_coding	cell division cycle 6 [Source:HGNC Symbol;Acc:HGNC:1744]	-
ENSG00000135074	8.77508	32.4298	9.7358	27.0111	32.7149	ADAM19	5	157395534	157575775	-	7704	protein_coding	ADAM metallopeptidase domain 19 [Source:HGNC Symbol;Acc:HGNC:197]	-
ENSG00000146670	1.46311	12.5149	1.56368	9.92262	9.95047	CDCA5	11	65066300	65084164	-	3925	protein_coding	cell division cycle associated 5 [Source:HGNC Symbol;Acc:HGNC:14626]	-
ENSG00000088340	4.56287	0.312848	6.1042	1.76035	0.816082	FER1L4	20	35558737	35607562	-	9067	transcribed_unitary_pseudogene	fer-1 like family member 4, pseudogene [Source:HGNC Symbol;Acc:HGNC:15801]	-
ENSG00000138675	1.58444	10.3251	1.83639	6.7004	9.32725	FGF5	4	80266599	80336680	+	5998	protein_coding	fibroblast growth factor 5 [Source:HGNC Symbol;Acc:HGNC:3683]	-
ENSG00000117724	0.991723	6.91112	1.05213	3.95187	6.74582	CENPF	1	214603195	214664588	+	11690	protein_coding	centromere protein F [Source:HGNC Symbol;Acc:HGNC:1857]	-
ENSG00000067082	9.87111	35.0539	12.0771	26.4842	40.4547	KLF6	10	3775996	3785281	-	6139	protein_coding	Kruppel like factor 6 [Source:HGNC Symbol;Acc:HGNC:2235]	zf-C2H2
ENSG00000066279	0.423969	4.44693	0.288895	2.21043	3.97057	ASPM	1	197084128	197146694	-	10887	protein_coding	abnormal spindle microtubule assembly [Source:HGNC Symbol;Acc:HGNC:19048]	-
ENSG00000104738	7.66947	25.0822	7.11717	17.4599	21.0987	MCM4	8	47960185	47978160	+	6973	protein_coding	minichromosome maintenance complex component 4 [Source:HGNC Symbol;Acc:HGNC:6947]	-
ENSG00000145386	2.66467	19.6999	1.92337	14.5161	19.8526	CCNA2	4	121816444	121823933	-	2798	protein_coding	cyclin A2 [Source:HGNC Symbol;Acc:HGNC:1578]	-
ENSG00000143476	0.789553	8.53414	0.627412	5.45941	7.67794	DTL	1	212035553	212107400	+	4916	protein_coding	denticleless E3 ubiquitin protein ligase homolog [Source:HGNC Symbol;Acc:HGNC:30288]	-
ENSG00000185745	13.2864	1.37768	9.69603	1.40675	1.14461	IFIT1	10	89392546	89406486	+	4613	protein_coding	interferon induced protein with tetratricopeptide repeats 1 [Source:HGNC Symbol;Acc:HGNC:5407]	-
ENSG00000170312	1.30503	12.0521	1.14117	8.82963	10.07	CDK1	10	60778331	60794852	+	3931	protein_coding	cyclin dependent kinase 1 [Source:HGNC Symbol;Acc:HGNC:1722]	-
ENSG00000106366	194.667	986.457	455.21	856.141	989.447	SERPINE1	7	101127089	101139266	+	3190	protein_coding	serpin family E member 1 [Source:HGNC Symbol;Acc:HGNC:8583]	-
ENSG00000134668	7.90835	28.9474	15.3393	32.9217	29.3353	SPOCD1	1	31790422	31816051	-	7085	protein_coding	SPOC domain containing 1 [Source:HGNC Symbol;Acc:HGNC:26338]	-
ENSG00000101412	2.72331	19.2666	2.32725	15.2002	15.8884	E2F1	20	33675683	33686404	-	2503	protein_coding	E2F transcription factor 1 [Source:HGNC Symbol;Acc:HGNC:3113]	E2F
ENSG00000237649	1.26218	15.0204	1.48658	9.9167	11.4129	KIFC1	6	33391536	33409924	+	3345	protein_coding	kinesin family member C1 [Source:HGNC Symbol;Acc:HGNC:6389]	-
ENSG00000223764	25.5034	6.23021	23.0061	12.6817	8.63973	LINC02593	1	916865	921016	-	4152	lincRNA	long intergenic non-protein coding RNA 2593 [Source:HGNC Symbol;Acc:HGNC:53933]	-
ENSG00000161011	211.815	84.0474	143.663	92.727	96.73	SQSTM1	5	179806398	179838078	+	7654	protein_coding	sequestosome 1 [Source:HGNC Symbol;Acc:HGNC:11280]	-
ENSG00000164761	10.7322	42.2265	15.6623	45.1498	46.1737	TNFRSF11B	8	118923557	118952200	-	2827	protein_coding	TNF receptor superfamily member 11b [Source:HGNC Symbol;Acc:HGNC:11909]	-
ENSG00000092969	0.875022	8.89747	1.00161	8.67371	11.5159	TGFB2	1	218346235	218444619	+	5151	protein_coding	transforming growth factor beta 2 [Source:HGNC Symbol;Acc:HGNC:11768]	-
ENSG00000103489	6.46806	25.5866	4.41059	20.8022	29.4995	XYLT1	16	17101769	17470881	-	11004	protein_coding	xylosyltransferase 1 [Source:HGNC Symbol;Acc:HGNC:15516]	-
ENSG00000118523	162.468	584.922	93.5343	768.315	728.536	CTGF	6	131948176	131951373	-	2339	protein_coding	connective tissue growth factor [Source:HGNC Symbol;Acc:HGNC:2500]	-
ENSG00000119917	24.3056	3.76591	16.8086	2.70637	3.45131	IFIT3	10	89327894	89340971	+	2640	protein_coding	interferon induced protein with tetratricopeptide repeats 3 [Source:HGNC Symbol;Acc:HGNC:5411]	-
ENSG00000164442	79.6195	277.27	82.4601	335.336	324.102	CITED2	6	139371807	139374620	-	2535	protein_coding	Cbp/p300 interacting transactivator with Glu/Asp rich carboxy-terminal domain 2 [Source:HGNC Symbol;Acc:HGNC:1987]	-
ENSG00000120802	2.74846	11.4337	2.55973	7.80083	10.6802	TMPO	12	98515512	98550379	+	8593	protein_coding	thymopoietin [Source:HGNC Symbol;Acc:HGNC:11875]	-
ENSG00000112118	8.29268	29.4601	6.4264	22.4342	24.4886	MCM3	6	52264009	52284881	-	3650	protein_coding	minichromosome maintenance complex component 3 [Source:HGNC Symbol;Acc:HGNC:6945]	-
ENSG00000176170	16.5786	53.1013	14.1021	64.4924	51.1045	SPHK1	17	76376584	76387860	+	4416	protein_coding	sphingosine kinase 1 [Source:HGNC Symbol;Acc:HGNC:11240]	-
ENSG00000183688	26.0585	70.271	18.1182	87.4196	81.8298	RFLNB	17	439978	445939	-	3621	protein_coding	refilin B [Source:HGNC Symbol;Acc:HGNC:28705]	-
ENSG00000123416	60.1625	167.435	43.1018	117.9	150.021	TUBA1B	12	49127782	49131397	-	3574	protein_coding	tubulin alpha 1b [Source:HGNC Symbol;Acc:HGNC:18809]	-
ENSG00000123485	0.605298	8.61818	0.563664	5.43864	6.88009	HJURP	2	233833416	233854566	-	3821	protein_coding	Holliday junction recognition protein [Source:HGNC Symbol;Acc:HGNC:25444]	-
ENSG00000109805	1.09347	9.68356	0.997967	5.80327	8.69037	NCAPG	4	17810902	17844862	+	4921	protein_coding	non-SMC condensin I complex subunit G [Source:HGNC Symbol;Acc:HGNC:24304]	-
ENSG00000167513	1.90224	14.564	2.97953	11.7386	12.5581	CDT1	16	88803213	88809258	+	3336	protein_coding	chromatin licensing and DNA replication factor 1 [Source:HGNC Symbol;Acc:HGNC:24576]	-
ENSG00000162545	14.6334	57.0501	25.7805	49.1318	55.8131	CAMK2N1	1	20482391	20486220	-	2615	protein_coding	calcium/calmodulin dependent protein kinase II inhibitor 1 [Source:HGNC Symbol;Acc:HGNC:24190]	-
ENSG00000186185	0.461103	6.66525	0.332628	3.70795	5.74914	KIF18B	17	44924709	44947711	-	4655	protein_coding	kinesin family member 18B [Source:HGNC Symbol;Acc:HGNC:27102]	-
ENSG00000139874	17.5893	51.5189	12.5284	50.8947	55.1184	SSTR1	14	38207999	38213067	+	4295	protein_coding	somatostatin receptor 1 [Source:HGNC Symbol;Acc:HGNC:11330]	-
ENSG00000161249	1.29992	9.13916	2.17951	11.1843	8.10105	DMKN	19	35497220	35513658	-	7444	protein_coding	dermokine [Source:HGNC Symbol;Acc:HGNC:25063]	-
ENSG00000134690	1.03809	13.3598	1.06296	8.99474	12.1053	CDCA8	1	37692418	37709719	+	2469	protein_coding	cell division cycle associated 8 [Source:HGNC Symbol;Acc:HGNC:14629]	-
ENSG00000109861	6.40925	18.6704	5.81476	17.899	17.561	CTSC	11	88293592	88337787	-	11421	protein_coding	cathepsin C [Source:HGNC Symbol;Acc:HGNC:2528]	-
ENSG00000050405	11.409	32.5533	7.75334	30.0683	33.6233	LIMA1	12	50175788	50283546	-	6317	protein_coding	LIM domain and actin binding 1 [Source:HGNC Symbol;Acc:HGNC:24636]	-
ENSG00000187134	34.1332	9.88747	42.9083	24.6075	16.0761	AKR1C1	10	4963253	4983283	+	8765	protein_coding	aldo-keto reductase family 1 member C1 [Source:HGNC Symbol;Acc:HGNC:384]	-
ENSG00000127586	1.96475	9.93568	2.04015	7.47922	7.50516	CHTF18	16	788046	800737	+	5916	protein_coding	chromosome transmission fidelity factor 18 [Source:HGNC Symbol;Acc:HGNC:18435]	-
ENSG00000168496	8.60922	34.5034	7.73695	31.3603	29.8568	FEN1	11	61792637	61797244	+	2478	protein_coding	flap structure-specific endonuclease 1 [Source:HGNC Symbol;Acc:HGNC:3650]	-
ENSG00000077942	45.4245	134.034	80.8881	149.697	136.74	FBLN1	22	45502238	45601135	+	7285	protein_coding	fibulin 1 [Source:HGNC Symbol;Acc:HGNC:3600]	-
ENSG00000136492	0.483319	4.3362	0.550111	2.70139	3.80528	BRIP1	17	61681266	61863521	-	7991	protein_coding	BRCA1 interacting protein C-terminal helicase 1 [Source:HGNC Symbol;Acc:HGNC:20473]	-
ENSG00000139514	5.69675	21.7794	4.30921	15.7792	21.3335	SLC7A1	13	29509410	29595688	-	7692	protein_coding	solute carrier family 7 member 1 [Source:HGNC Symbol;Acc:HGNC:11057]	-
ENSG00000161800	3.84058	16.3213	3.52908	10.8929	13.7243	RACGAP1	12	49976923	50033136	-	4487	protein_coding	Rac GTPase activating protein 1 [Source:HGNC Symbol;Acc:HGNC:9804]	-
ENSG00000165244	0.730011	8.66312	0.539918	6.11129	7.98367	ZNF367	9	96385941	96418329	-	3646	protein_coding	zinc finger protein 367 [Source:HGNC Symbol;Acc:HGNC:18320]	zf-C2H2
ENSG00000119922	8.01733	0.460906	3.80119	0.276306	0.36277	IFIT2	10	89283694	89309276	+	4101	protein_coding	interferon induced protein with tetratricopeptide repeats 2 [Source:HGNC Symbol;Acc:HGNC:5409]	-
ENSG00000221890	17.9318	3.31378	15.4253	3.39839	3.83126	NPTXR	22	38818452	38843982	-	5784	protein_coding	neuronal pentraxin receptor [Source:HGNC Symbol;Acc:HGNC:7954]	-
ENSG00000150051	6.34073	24.4833	6.87203	25.3431	27.2888	MKX	10	27672875	27746060	-	4106	protein_coding	mohawk homeobox [Source:HGNC Symbol;Acc:HGNC:23729]	Others
ENSG00000130816	8.78453	23.1111	7.04865	17.2545	20.8553	DNMT1	19	10133345	10231286	-	9796	protein_coding	DNA methyltransferase 1 [Source:HGNC Symbol;Acc:HGNC:2976]	-
ENSG00000197646	3.57424	20.8513	3.05505	18.4429	21.9855	PDCD1LG2	9	5510570	5571254	+	2365	protein_coding	programmed cell death 1 ligand 2 [Source:HGNC Symbol;Acc:HGNC:18731]	-
ENSG00000171793	3.40442	11.2743	1.65584	11.6734	11.7214	CTPS1	1	40979335	41012565	+	11517	protein_coding	CTP synthase 1 [Source:HGNC Symbol;Acc:HGNC:2519]	-
ENSG00000040275	5.92521	21.5619	4.21609	23.0176	26.0701	SPDL1	5	169583634	169604778	+	4777	protein_coding	spindle apparatus coiled-coil protein 1 [Source:HGNC Symbol;Acc:HGNC:26010]	-
ENSG00000164104	3.38085	21.3962	3.22499	18.8683	17.1944	HMGB2	4	173331695	173335125	-	2775	protein_coding	high mobility group box 2 [Source:HGNC Symbol;Acc:HGNC:5000]	HMG
ENSG00000138160	1.64595	9.19181	1.35739	5.75964	9.11024	KIF11	10	92593286	92655395	+	4860	protein_coding	kinesin family member 11 [Source:HGNC Symbol;Acc:HGNC:6388]	-
ENSG00000185215	34.0374	11.1753	63.9545	13.6703	12.5547	TNFAIP2	14	103123442	103137439	+	5029	protein_coding	TNF alpha induced protein 2 [Source:HGNC Symbol;Acc:HGNC:11895]	-
ENSG00000130513	147.901	44.2721	212.039	74.6384	53.8389	GDF15	19	18374731	18389176	+	2087	protein_coding	growth differentiation factor 15 [Source:HGNC Symbol;Acc:HGNC:30142]	-
ENSG00000075218	0.869822	8.72558	0.949126	4.7255	8.38948	GTSE1	22	46296741	46330810	+	4242	protein_coding	G2 and S-phase expressed 1 [Source:HGNC Symbol;Acc:HGNC:13698]	-
ENSG00000165304	2.77184	15.0515	1.77306	9.42516	12.6176	MELK	9	36572862	36677683	+	3087	protein_coding	maternal embryonic leucine zipper kinase [Source:HGNC Symbol;Acc:HGNC:16870]	-
ENSG00000183963	9.68055	27.9216	13.9545	28.2893	28.9067	SMTN	22	31064105	31104757	+	10242	protein_coding	smoothelin [Source:HGNC Symbol;Acc:HGNC:11126]	-
ENSG00000178999	1.4055	14.2731	1.21379	10.8481	11.0693	AURKB	17	8204733	8210600	-	2241	protein_coding	aurora kinase B [Source:HGNC Symbol;Acc:HGNC:11390]	-
ENSG00000156802	2.15412	9.21397	1.73229	6.0218	8.71696	ATAD2	8	123319850	123416350	-	7118	protein_coding	ATPase family, AAA domain containing 2 [Source:HGNC Symbol;Acc:HGNC:30123]	-
ENSG00000071539	0.935232	9.28807	1.09712	6.93504	8.2633	TRIP13	5	892643	919357	+	3560	protein_coding	thyroid hormone receptor interactor 13 [Source:HGNC Symbol;Acc:HGNC:12307]	-
ENSG00000176014	80.4523	237.503	51.8066	272.422	225.676	TUBB6	18	12307669	12344320	+	4117	protein_coding	tubulin beta 6 class V [Source:HGNC Symbol;Acc:HGNC:20776]	-
ENSG00000130589	11.4853	2.94855	8.60316	2.55438	3.45343	HELZ2	20	63558086	63574239	-	12066	protein_coding	helicase with zinc finger 2 [Source:HGNC Symbol;Acc:HGNC:30021]	-
ENSG00000108854	7.74658	21.9114	8.3202	15.809	21.1027	SMURF2	17	64542295	64662068	-	6961	protein_coding	SMAD specific E3 ubiquitin protein ligase 2 [Source:HGNC Symbol;Acc:HGNC:16809]	-
ENSG00000078081	7.78214	0.498945	8.70277	0.392351	0.519724	LAMP3	3	183122213	183163839	-	3816	protein_coding	lysosomal associated membrane protein 3 [Source:HGNC Symbol;Acc:HGNC:14582]	-
ENSG00000101057	1.32537	11.3167	2.15925	9.33273	9.56785	MYBL2	20	43667019	43716496	+	2777	protein_coding	MYB proto-oncogene like 2 [Source:HGNC Symbol;Acc:HGNC:7548]	MYB
ENSG00000177084	0.96994	3.87939	1.14747	2.56308	3.28101	POLE	12	132623753	132687365	-	16609	protein_coding	DNA polymerase epsilon, catalytic subunit [Source:HGNC Symbol;Acc:HGNC:9177]	-
ENSG00000133048	21.0202	67.0328	39.1106	75.0633	68.2953	CHI3L1	1	203178931	203186749	-	3408	protein_coding	chitinase 3 like 1 [Source:HGNC Symbol;Acc:HGNC:1932]	-
ENSG00000139734	0.378139	3.92771	0.413479	2.45711	3.98116	DIAPH3	13	59665583	60163987	-	7442	protein_coding	diaphanous related formin 3 [Source:HGNC Symbol;Acc:HGNC:15480]	-
ENSG00000163171	3.43728	10.5965	3.15549	9.04405	10.9575	CDC42EP3	2	37641882	37738468	-	10406	protein_coding	CDC42 effector protein 3 [Source:HGNC Symbol;Acc:HGNC:16943]	-
ENSG00000162607	3.45243	14.6681	3.66794	12.9195	13.8529	USP1	1	62436297	62451804	+	4263	protein_coding	ubiquitin specific peptidase 1 [Source:HGNC Symbol;Acc:HGNC:12607]	-
ENSG00000108448	19.0823	4.63745	15.9324	10.2213	10.0694	TRIM16L	17	18697998	18736118	+	4329	protein_coding	tripartite motif containing 16 like [Source:HGNC Symbol;Acc:HGNC:32670]	-
ENSG00000122952	3.16393	18.3802	3.29871	13.2703	15.3212	ZWINT	10	56357228	56361275	-	2378	protein_coding	ZW10 interacting kinetochore protein [Source:HGNC Symbol;Acc:HGNC:13195]	-
ENSG00000167460	93.6778	233.311	122.988	219.053	237.566	TPM4	19	16067021	16103005	+	8632	protein_coding	tropomyosin 4 [Source:HGNC Symbol;Acc:HGNC:12013]	-
ENSG00000092853	0.486707	5.40009	0.391491	2.55721	4.15782	CLSPN	1	35720218	35769967	-	5411	protein_coding	claspin [Source:HGNC Symbol;Acc:HGNC:19715]	-
ENSG00000121440	20.7796	6.56322	28.7188	10.0459	8.78984	PDZRN3	3	73382433	73624940	-	6136	protein_coding	PDZ domain containing ring finger 3 [Source:HGNC Symbol;Acc:HGNC:17704]	-
ENSG00000171451	8.86454	31.6787	7.46926	29.7752	31.2401	DSEL	18	67506582	67516980	-	9531	protein_coding	dermatan sulfate epimerase like [Source:HGNC Symbol;Acc:HGNC:18144]	-
ENSG00000180573	60.4531	15.7679	36.0488	15.5189	14.3676	HIST1H2AC	6	26124145	26139116	+	1668	protein_coding	histone cluster 1 H2A family member c [Source:HGNC Symbol;Acc:HGNC:4733]	-
ENSG00000138180	1.31687	10.9664	0.867396	6.21307	10.462	CEP55	10	93496632	93529092	+	3271	protein_coding	centrosomal protein 55 [Source:HGNC Symbol;Acc:HGNC:1161]	-
ENSG00000169679	1.08067	6.9573	0.975807	3.926	6.89882	BUB1	2	110637698	110678114	-	6032	protein_coding	BUB1 mitotic checkpoint serine/threonine kinase [Source:HGNC Symbol;Acc:HGNC:1148]	-
ENSG00000159840	88.5907	252.987	96.522	251.136	242.245	ZYX	7	143381080	143391111	+	3482	protein_coding	zyxin [Source:HGNC Symbol;Acc:HGNC:13200]	-
ENSG00000140961	18.8924	4.51849	6.59223	9.4646	8.17566	OSGIN1	16	83948282	83966332	+	3460	protein_coding	oxidative stress induced growth inhibitor 1 [Source:HGNC Symbol;Acc:HGNC:30093]	-
ENSG00000049540	1.73711	9.81976	5.71342	20.3885	13.6044	ELN	7	74027789	74069907	+	6542	protein_coding	elastin [Source:HGNC Symbol;Acc:HGNC:3327]	-
ENSG00000111962	19.8595	4.97729	21.9102	6.39961	5.94398	UST	6	148747328	149076990	+	4563	protein_coding	uronyl 2-sulfotransferase [Source:HGNC Symbol;Acc:HGNC:17223]	-
ENSG00000167601	40.6828	100.622	54.8055	81.6366	93.2229	AXL	19	41219203	41261766	+	5154	protein_coding	AXL receptor tyrosine kinase [Source:HGNC Symbol;Acc:HGNC:905]	-
ENSG00000160957	2.80296	11.9493	3.04533	11.6201	9.54031	RECQL4	8	144511288	144517845	-	4236	protein_coding	RecQ like helicase 4 [Source:HGNC Symbol;Acc:HGNC:9949]	-
ENSG00000166851	1.4578	9.30942	1.44566	6.57481	8.12646	PLK1	16	23677656	23690367	+	4760	protein_coding	polo like kinase 1 [Source:HGNC Symbol;Acc:HGNC:9077]	-
ENSG00000100364	27.1724	10.7161	21.5988	12.885	11.988	KIAA0930	22	45190338	45240769	-	10019	protein_coding	KIAA0930 [Source:HGNC Symbol;Acc:HGNC:1314]	-
ENSG00000176619	20.3499	51.4242	14.8307	39.0795	46.3961	LMNB2	19	2427638	2456996	-	5432	protein_coding	lamin B2 [Source:HGNC Symbol;Acc:HGNC:6638]	-
ENSG00000091651	0.978367	7.4024	0.655971	6.0633	6.07739	ORC6	16	46689643	46698394	+	4309	protein_coding	origin recognition complex subunit 6 [Source:HGNC Symbol;Acc:HGNC:17151]	-
ENSG00000101335	209.126	663.085	282.778	817.629	619.434	MYL9	20	36541484	36551447	+	2821	protein_coding	myosin light chain 9 [Source:HGNC Symbol;Acc:HGNC:15754]	-
ENSG00000076513	8.21036	22.2989	8.44441	20.5571	23.8319	ANKRD13A	12	109999186	110039763	+	7350	protein_coding	ankyrin repeat domain 13A [Source:HGNC Symbol;Acc:HGNC:21268]	-
ENSG00000159403	4.80677	18.52	10.6264	25.0631	19.6731	C1R	12	7080199	7092607	-	5885	protein_coding	complement C1r [Source:HGNC Symbol;Acc:HGNC:1246]	-
ENSG00000168078	1.60739	13.6254	1.1971	12.2853	13.4194	PBK	8	27809620	27838095	-	2165	protein_coding	PDZ binding kinase [Source:HGNC Symbol;Acc:HGNC:18282]	-
ENSG00000105011	1.38601	12.9221	1.45155	7.52143	10.5677	ASF1B	19	14119509	14136956	-	2304	protein_coding	anti-silencing function 1B histone chaperone [Source:HGNC Symbol;Acc:HGNC:20996]	-
ENSG00000101194	6.36187	21.6778	12.3407	20.979	21.8368	SLC17A9	20	62952647	62969585	+	5521	protein_coding	solute carrier family 17 member 9 [Source:HGNC Symbol;Acc:HGNC:16192]	-
ENSG00000119969	0.488644	3.30028	0.447092	2.30211	2.85387	HELLS	10	94501434	94613905	+	10148	protein_coding	helicase, lymphoid specific [Source:HGNC Symbol;Acc:HGNC:4861]	-
ENSG00000112984	1.14793	8.11893	0.924389	4.64404	7.56691	KIF20A	5	138178719	138187715	+	3958	protein_coding	kinesin family member 20A [Source:HGNC Symbol;Acc:HGNC:9787]	-
ENSG00000189057	0.262971	5.54885	0.272253	3.16839	4.30371	FAM111B	11	59107185	59127410	+	3863	protein_coding	family with sequence similarity 111 member B [Source:HGNC Symbol;Acc:HGNC:24200]	-
ENSG00000108821	820.846	2061.04	1060.84	2289	2384.47	COL1A1	17	50183289	50201632	-	9819	protein_coding	collagen type I alpha 1 chain [Source:HGNC Symbol;Acc:HGNC:2197]	-
ENSG00000072110	56.9074	152.421	66.7106	130.637	152.04	ACTN1	14	68874143	68979440	-	10626	protein_coding	actinin alpha 1 [Source:HGNC Symbol;Acc:HGNC:163]	-
ENSG00000168685	8.09022	22.6932	9.50272	20.9622	27.0885	IL7R	5	35852695	35879603	+	6060	protein_coding	interleukin 7 receptor [Source:HGNC Symbol;Acc:HGNC:6024]	-
ENSG00000125753	20.0262	62.5823	24.9591	64.8505	55.4439	VASP	19	45506579	45526983	+	3601	protein_coding	vasodilator stimulated phosphoprotein [Source:HGNC Symbol;Acc:HGNC:12652]	-
ENSG00000213626	16.0936	61.3531	30.3763	67.5951	64.5901	LBH	2	30231369	30323730	+	4697	protein_coding	limb bud and heart development [Source:HGNC Symbol;Acc:HGNC:29532]	-
ENSG00000177469	181.777	453.647	203.617	453.203	458.35	CAVIN1	17	42402452	42423517	-	3828	protein_coding	caveolae associated protein 1 [Source:HGNC Symbol;Acc:HGNC:9688]	-
ENSG00000108691	17.2614	2.16564	19.5	3.75531	3.1587	CCL2	17	34255218	34257203	+	1986	protein_coding	C-C motif chemokine ligand 2 [Source:HGNC Symbol;Acc:HGNC:10618]	-
ENSG00000196878	11.4521	2.62298	11.6128	3.23855	3.23363	LAMB3	1	209614870	209652466	-	4688	protein_coding	laminin subunit beta 3 [Source:HGNC Symbol;Acc:HGNC:6490]	-
ENSG00000093009	0.707473	8.24957	0.569251	6.25935	7.05712	CDC45	22	19479459	19520612	+	2846	protein_coding	cell division cycle 45 [Source:HGNC Symbol;Acc:HGNC:1739]	-
ENSG00000175063	2.18362	26.0313	2.51536	23.67	21.4831	UBE2C	20	45812576	45816957	+	1286	protein_coding	ubiquitin conjugating enzyme E2 C [Source:HGNC Symbol;Acc:HGNC:15937]	-
ENSG00000137812	0.2974	2.64992	0.229997	1.51402	2.49867	KNL1	15	40594020	40664342	+	10250	protein_coding	kinetochore scaffold 1 [Source:HGNC Symbol;Acc:HGNC:24054]	-
ENSG00000134057	6.92395	25.8432	5.17466	21.2704	25.9119	CCNB1	5	69167010	69178245	+	2558	protein_coding	cyclin B1 [Source:HGNC Symbol;Acc:HGNC:1579]	-
ENSG00000167670	2.89768	12.0924	3.42583	10.7186	10.7796	CHAF1A	19	4402662	4445018	+	4299	protein_coding	chromatin assembly factor 1 subunit A [Source:HGNC Symbol;Acc:HGNC:1910]	-
ENSG00000221963	4.19771	0.764712	2.80263	1.06146	0.947247	APOL6	22	35648395	35668409	+	10121	protein_coding	apolipoprotein L6 [Source:HGNC Symbol;Acc:HGNC:14870]	-
ENSG00000169607	0.478833	4.61198	0.35128	2.6097	4.60203	CKAP2L	2	112736607	112764677	-	5219	protein_coding	cytoskeleton associated protein 2 like [Source:HGNC Symbol;Acc:HGNC:26877]	-
ENSG00000175592	35.0095	98.6067	27.3977	69.5042	91.7256	FOSL1	11	65892049	65900573	-	1887	protein_coding	FOS like 1, AP-1 transcription factor subunit [Source:HGNC Symbol;Acc:HGNC:13718]	TF_bZIP
ENSG00000140682	19.4447	64.1827	31.2558	64.0289	63.534	TGFB1I1	16	31471585	31477960	+	5403	protein_coding	transforming growth factor beta 1 induced transcript 1 [Source:HGNC Symbol;Acc:HGNC:11767]	-
ENSG00000128965	2.41684	16.5292	3.17398	12.0764	13.2671	CHAC1	15	40952962	40956519	+	2058	protein_coding	ChaC glutathione specific gamma-glutamylcyclotransferase 1 [Source:HGNC Symbol;Acc:HGNC:28680]	-
ENSG00000204580	16.4004	6.12531	25.131	6.65375	6.59445	DDR1	6	30876421	30900156	+	9122	protein_coding	discoidin domain receptor tyrosine kinase 1 [Source:HGNC Symbol;Acc:HGNC:2730]	-
ENSG00000133816	3.46564	9.70351	2.37737	7.41317	10.8785	MICAL2	11	12094008	12359144	+	20191	protein_coding	microtubule associated monooxygenase, calponin and LIM domain containing 2 [Source:HGNC Symbol;Acc:HGNC:24693]	-
ENSG00000065833	58.0912	20.0801	38.0891	25.4956	26.2812	ME1	6	83210389	83431071	-	3371	protein_coding	malic enzyme 1 [Source:HGNC Symbol;Acc:HGNC:6983]	-
ENSG00000072163	2.51312	11.9155	3.78847	16.9951	12.2687	LIMS2	2	127638381	127681786	-	8487	protein_coding	LIM zinc finger domain containing 2 [Source:HGNC Symbol;Acc:HGNC:16084]	-
ENSG00000113739	20.6033	69.7713	50.2923	63.3548	58.5609	STC2	5	173314713	173329503	-	6128	protein_coding	stanniocalcin 2 [Source:HGNC Symbol;Acc:HGNC:11374]	-
ENSG00000170421	12.8697	3.02924	27.5887	4.43788	3.16153	KRT8	12	52897187	52949954	-	6881	protein_coding	keratin 8 [Source:HGNC Symbol;Acc:HGNC:6446]	-
ENSG00000064666	60.08	151.635	66.6546	152.651	149.212	CNN2	19	1026581	1039068	+	3645	protein_coding	calponin 2 [Source:HGNC Symbol;Acc:HGNC:2156]	-
ENSG00000074410	5.54527	0.80108	13.1019	1.57695	1.17692	CA12	15	63321378	63382161	-	7313	protein_coding	carbonic anhydrase 12 [Source:HGNC Symbol;Acc:HGNC:1371]	-
ENSG00000173193	6.85601	1.53412	5.84774	1.9711	2.05931	PARP14	3	122680618	122730840	+	10495	protein_coding	poly(ADP-ribose) polymerase family member 14 [Source:HGNC Symbol;Acc:HGNC:29232]	-
ENSG00000171992	8.25245	2.09448	14.7451	3.73786	3.37806	SYNPO	5	150601080	150659220	+	10258	protein_coding	synaptopodin [Source:HGNC Symbol;Acc:HGNC:30672]	-
ENSG00000075624	1284.39	3278.38	1231.43	3845.85	3412.39	ACTB	7	5527147	5563784	-	3519	protein_coding	actin beta [Source:HGNC Symbol;Acc:HGNC:132]	-
ENSG00000159176	15.4742	43.5594	19.0132	55.1759	44.8837	CSRP1	1	201483530	201509456	-	10318	protein_coding	cysteine and glycine rich protein 1 [Source:HGNC Symbol;Acc:HGNC:2469]	-
ENSG00000198826	1.25233	6.68716	1.16273	4.52559	6.70504	ARHGAP11A	15	32615144	32639949	+	6428	protein_coding	Rho GTPase activating protein 11A [Source:HGNC Symbol;Acc:HGNC:15783]	-
ENSG00000092470	1.16338	7.36549	0.903034	5.14265	5.84902	WDR76	15	43826963	43868419	+	4078	protein_coding	WD repeat domain 76 [Source:HGNC Symbol;Acc:HGNC:25773]	-
ENSG00000166833	1.46907	5.47755	3.02671	4.4991	6.04118	NAV2	11	19350724	20121598	+	14673	protein_coding	neuron navigator 2 [Source:HGNC Symbol;Acc:HGNC:15997]	-
ENSG00000121691	52.3665	21.606	47.0249	21.0891	24.5167	CAT	11	34438925	34472062	+	3590	protein_coding	catalase [Source:HGNC Symbol;Acc:HGNC:1516]	-
ENSG00000065328	0.268411	3.64415	0.225849	2.49644	3.29584	MCM10	10	13161554	13211104	+	5454	protein_coding	minichromosome maintenance 10 replication initiation factor [Source:HGNC Symbol;Acc:HGNC:18043]	-
ENSG00000114850	47.3585	102.311	43.223	109.729	100.788	SSR3	3	156540140	156555184	-	4627	protein_coding	signal sequence receptor subunit 3 [Source:HGNC Symbol;Acc:HGNC:11325]	-
ENSG00000198467	268.783	656.394	334.145	1148.58	604.028	TPM2	9	35681992	35690121	-	3248	protein_coding	tropomyosin 2 [Source:HGNC Symbol;Acc:HGNC:12011]	-
ENSG00000143819	126.8	53.8651	103.267	72.1266	57.1369	EPHX1	1	225810092	225845563	+	2508	protein_coding	epoxide hydrolase 1 [Source:HGNC Symbol;Acc:HGNC:3401]	-
ENSG00000142627	9.97202	30.9077	10.6491	22.0924	26.3284	EPHA2	1	16124337	16156087	-	4159	protein_coding	EPH receptor A2 [Source:HGNC Symbol;Acc:HGNC:3386]	-
ENSG00000124795	9.49718	30.3244	10.3014	24.0333	28.2486	DEK	6	18223868	18264823	-	4361	protein_coding	DEK proto-oncogene [Source:HGNC Symbol;Acc:HGNC:2768]	-
ENSG00000138061	4.36661	0.428239	6.00369	0.936958	0.706975	CYP1B1	2	38066973	38109902	-	6014	protein_coding	cytochrome P450 family 1 subfamily B member 1 [Source:HGNC Symbol;Acc:HGNC:2597]	-
ENSG00000170558	18.7183	44.0406	18.9132	45.5648	49.9887	CDH2	18	27950966	28177446	-	4950	protein_coding	cadherin 2 [Source:HGNC Symbol;Acc:HGNC:1759]	-
ENSG00000177425	3.91484	9.85871	3.52915	10.2629	10.5864	PAWR	12	79574979	79691097	-	11668	protein_coding	pro-apoptotic WT1 regulator [Source:HGNC Symbol;Acc:HGNC:8614]	-
ENSG00000198796	5.43192	13.4365	4.27221	14.3123	15.3955	ALPK2	18	58481247	58628957	-	9431	protein_coding	alpha kinase 2 [Source:HGNC Symbol;Acc:HGNC:20565]	-
ENSG00000146918	1.61879	6.99193	1.65797	4.81838	6.32572	NCAPG2	7	158631311	158704829	-	6988	protein_coding	non-SMC condensin II complex subunit G2 [Source:HGNC Symbol;Acc:HGNC:21904]	-
ENSG00000071127	49.8601	110.867	46.5906	114.757	107.114	WDR1	4	10074339	10116949	-	7827	protein_coding	WD repeat domain 1 [Source:HGNC Symbol;Acc:HGNC:12754]	-
ENSG00000153904	12.9162	34.4504	7.56879	29.7033	37.39	DDAH1	1	85318481	85578363	-	4568	protein_coding	dimethylarginine dimethylaminohydrolase 1 [Source:HGNC Symbol;Acc:HGNC:2715]	-
ENSG00000183580	23.0916	7.04798	22.8664	7.80527	9.24457	FBXL7	5	15500196	15939795	+	4854	protein_coding	F-box and leucine rich repeat protein 7 [Source:HGNC Symbol;Acc:HGNC:13604]	-
ENSG00000151725	0.907856	7.73118	0.744715	5.72608	6.39633	CENPU	4	184694618	184734133	-	2953	protein_coding	centromere protein U [Source:HGNC Symbol;Acc:HGNC:21348]	-
ENSG00000151632	7.17756	1.66742	15.3627	5.02974	2.69759	AKR1C2	10	4987400	5018031	-	6461	protein_coding	aldo-keto reductase family 1 member C2 [Source:HGNC Symbol;Acc:HGNC:385]	-
ENSG00000087586	3.57047	14.9552	2.86774	11.8364	13.9403	AURKA	20	56369389	56392337	-	2928	protein_coding	aurora kinase A [Source:HGNC Symbol;Acc:HGNC:11393]	-
ENSG00000157456	1.71938	10.2985	2.0002	6.84842	9.13638	CCNB2	15	59105078	59125045	+	2801	protein_coding	cyclin B2 [Source:HGNC Symbol;Acc:HGNC:1580]	-
ENSG00000099194	420.333	159.236	332.805	105.245	190.578	SCD	10	100347124	100364834	+	5362	protein_coding	stearoyl-CoA desaturase [Source:HGNC Symbol;Acc:HGNC:10571]	-
ENSG00000221852	0.438376	15.5361	0.755829	15.5359	17.609	KRTAP1-5	17	41026026	41027202	-	1177	protein_coding	keratin associated protein 1-5 [Source:HGNC Symbol;Acc:HGNC:16777]	-
ENSG00000151414	16.8114	42.0761	13.4353	39.7182	45.9468	NEK7	1	198156963	198322420	+	5485	protein_coding	NIMA related kinase 7 [Source:HGNC Symbol;Acc:HGNC:13386]	-
ENSG00000142945	1.49668	9.07606	1.39932	7.82241	8.63904	KIF2C	1	44739818	44767767	+	3646	protein_coding	kinesin family member 2C [Source:HGNC Symbol;Acc:HGNC:6393]	-
ENSG00000162614	8.52975	22.9573	4.59213	25.2646	23.9187	NEXN	1	77888513	77943895	+	4436	protein_coding	nexilin F-actin binding protein [Source:HGNC Symbol;Acc:HGNC:29557]	-
ENSG00000182481	32.0673	75.7628	18.9835	64.0866	68.6992	KPNA2	17	68035519	68046842	+	3140	protein_coding	karyopherin subunit alpha 2 [Source:HGNC Symbol;Acc:HGNC:6395]	-
ENSG00000122786	76.6434	148.491	98.0301	146.36	160.15	CALD1	7	134744252	134970728	+	9843	protein_coding	caldesmon 1 [Source:HGNC Symbol;Acc:HGNC:1441]	-
ENSG00000106624	47.1009	105.284	75.2224	111.562	110.822	AEBP1	7	44104361	44114562	+	4955	protein_coding	AE binding protein 1 [Source:HGNC Symbol;Acc:HGNC:303]	-
ENSG00000024526	0.499107	4.16922	0.352943	2.83333	4.30827	DEPDC1	1	68474152	68497221	-	5904	protein_coding	DEP domain containing 1 [Source:HGNC Symbol;Acc:HGNC:22949]	-
ENSG00000049860	72.8781	35.1104	72.1164	37.4017	35.6	HEXB	5	74640023	74722647	+	5067	protein_coding	hexosaminidase subunit beta [Source:HGNC Symbol;Acc:HGNC:4879]	-
ENSG00000165029	3.80993	0.510125	9.23121	0.610253	0.474447	ABCA1	9	104781002	104928237	-	11350	protein_coding	ATP binding cassette subfamily A member 1 [Source:HGNC Symbol;Acc:HGNC:29]	-
ENSG00000103175	1.5247	6.41396	2.36941	12.2072	7.27979	WFDC1	16	84294646	84329851	+	8785	protein_coding	WAP four-disulfide core domain 1 [Source:HGNC Symbol;Acc:HGNC:15466]	-
ENSG00000119326	4.45048	17.1933	4.42067	16.9223	16.7972	CTNNAL1	9	108942569	109013529	-	3131	protein_coding	catenin alpha like 1 [Source:HGNC Symbol;Acc:HGNC:2512]	-
ENSG00000165480	0.623092	6.59611	0.729014	3.97526	5.93638	SKA3	13	21153595	21176602	-	3048	protein_coding	spindle and kinetochore associated complex subunit 3 [Source:HGNC Symbol;Acc:HGNC:20262]	-
ENSG00000135476	0.464043	3.27944	0.583758	1.92712	2.837	ESPL1	12	53268299	53293643	+	8890	protein_coding	extra spindle pole bodies like 1, separase [Source:HGNC Symbol;Acc:HGNC:16856]	-
ENSG00000189410	1.0026	6.04551	0.619838	3.51778	4.49166	SH2D5	1	20719732	20732837	-	4423	protein_coding	SH2 domain containing 5 [Source:HGNC Symbol;Acc:HGNC:28819]	-
ENSG00000143179	3.97816	12.1369	2.69668	11.2278	10.924	UCK2	1	165827531	165911618	+	7067	protein_coding	uridine-cytidine kinase 2 [Source:HGNC Symbol;Acc:HGNC:12562]	-
ENSG00000110900	5.8944	1.34017	6.23776	2.484	1.92021	TSPAN11	12	30926428	30996599	+	7113	protein_coding	tetraspanin 11 [Source:HGNC Symbol;Acc:HGNC:30795]	-
ENSG00000155816	3.11554	9.07572	3.43372	6.75238	8.29657	FMN2	1	240014348	240475189	+	9691	protein_coding	formin 2 [Source:HGNC Symbol;Acc:HGNC:14074]	-
ENSG00000129195	0.572713	6.64032	0.387711	4.47095	5.72152	PIMREG	17	6444415	6451469	+	2823	protein_coding	PICALM interacting mitotic regulator [Source:HGNC Symbol;Acc:HGNC:25483]	-
ENSG00000145390	1.96921	6.73957	2.12141	4.9912	5.81287	USP53	4	119212587	119295517	+	11950	protein_coding	ubiquitin specific peptidase 53 [Source:HGNC Symbol;Acc:HGNC:29255]	-
ENSG00000143933	50.9555	111.273	40.0864	137.303	109.183	CALM2	2	47160082	47176601	-	6466	protein_coding	calmodulin 2 [Source:HGNC Symbol;Acc:HGNC:1445]	-
ENSG00000133818	14.6416	37.3363	13.4663	35.3421	34.6896	RRAS2	11	14277926	14364506	-	3453	protein_coding	RAS related 2 [Source:HGNC Symbol;Acc:HGNC:17271]	-
ENSG00000068489	1.66525	8.22926	1.71913	4.68842	7.98324	PRR11	17	59155499	59204705	+	4080	protein_coding	proline rich 11 [Source:HGNC Symbol;Acc:HGNC:25619]	-
ENSG00000100906	34.2477	11.7075	49.4504	19.3174	12.5221	NFKBIA	14	35401511	35404749	-	2373	protein_coding	NFKB inhibitor alpha [Source:HGNC Symbol;Acc:HGNC:7797]	-
ENSG00000126787	1.04115	7.49859	0.818008	5.22576	7.29483	DLGAP5	14	55148112	55191678	-	3667	protein_coding	DLG associated protein 5 [Source:HGNC Symbol;Acc:HGNC:16864]	-
ENSG00000126709	81.8859	23.5882	62.224	37.0671	19.7525	IFI6	1	27666061	27672218	-	865	protein_coding	interferon alpha inducible protein 6 [Source:HGNC Symbol;Acc:HGNC:4054]	-
ENSG00000183486	1.76767	0.124904	1.40048	0.19301	0.205721	MX2	21	41361943	41409390	+	13047	protein_coding	MX dynamin like GTPase 2 [Source:HGNC Symbol;Acc:HGNC:7533]	-
ENSG00000156587	39.4048	14.2615	37.7272	16.8571	15.5585	UBE2L6	11	57551656	57568284	-	2197	protein_coding	ubiquitin conjugating enzyme E2 L6 [Source:HGNC Symbol;Acc:HGNC:12490]	-
ENSG00000105612	39.7255	14.3498	36.2137	18.8288	14.9355	DNASE2	19	12875211	12881468	-	2389	protein_coding	deoxyribonuclease 2, lysosomal [Source:HGNC Symbol;Acc:HGNC:2960]	-
ENSG00000160949	3.245	9.62764	3.45354	7.42381	8.21363	TONSL	8	144428775	144444444	-	7111	protein_coding	tonsoku like, DNA repair protein [Source:HGNC Symbol;Acc:HGNC:7801]	-
ENSG00000121152	0.731726	6.48838	0.573352	3.73213	5.97423	NCAPH	2	96335787	96373845	+	3278	protein_coding	non-SMC condensin I complex subunit H [Source:HGNC Symbol;Acc:HGNC:1112]	-
ENSG00000135480	7.88334	89.3177	30.2195	144.852	94.1936	KRT7	12	52232520	52252186	+	4093	protein_coding	keratin 7 [Source:HGNC Symbol;Acc:HGNC:6445]	-
ENSG00000177606	24.7509	72.3058	55.7912	78.6546	73.7832	JUN	1	58780788	58784327	-	3540	protein_coding	Jun proto-oncogene, AP-1 transcription factor subunit [Source:HGNC Symbol;Acc:HGNC:6204]	TF_bZIP
ENSG00000174804	0.549934	3.38777	0.637058	2.64971	3.19839	FZD4	11	86945679	86955391	-	7383	protein_coding	frizzled class receptor 4 [Source:HGNC Symbol;Acc:HGNC:4042]	-
ENSG00000157168	2.31011	6.81216	5.81765	7.33505	7.45525	NRG1	8	31639386	32767959	+	11328	protein_coding	neuregulin 1 [Source:HGNC Symbol;Acc:HGNC:7997]	-
ENSG00000041982	101.591	234.626	176.723	195.412	246.913	TNC	9	115019578	115118257	-	9636	protein_coding	tenascin C [Source:HGNC Symbol;Acc:HGNC:5318]	-
ENSG00000187608	86.3228	27.4342	77.9361	53.239	29.4116	ISG15	1	1001138	1014540	+	941	protein_coding	ISG15 ubiquitin-like modifier [Source:HGNC Symbol;Acc:HGNC:4053]	-
ENSG00000085662	254.709	113.357	335.934	181.609	129.841	AKR1B1	7	134442350	134459284	-	3660	protein_coding	aldo-keto reductase family 1 member B [Source:HGNC Symbol;Acc:HGNC:381]	-
ENSG00000115267	4.7267	0.450489	3.30401	0.760146	0.538156	IFIH1	2	162267079	162318703	-	5108	protein_coding	interferon induced with helicase C domain 1 [Source:HGNC Symbol;Acc:HGNC:18873]	-
ENSG00000138685	22.2589	47.0182	30.4232	63.6271	63.0301	FGF2	4	122826708	122898236	+	6775	protein_coding	fibroblast growth factor 2 [Source:HGNC Symbol;Acc:HGNC:3676]	-
ENSG00000133119	1.94183	9.9601	1.73882	7.463	9.37326	RFC3	13	33818049	33966558	+	2874	protein_coding	replication factor C subunit 3 [Source:HGNC Symbol;Acc:HGNC:9971]	-
ENSG00000112742	0.494032	4.65939	0.570248	2.89275	4.29059	TTK	6	80003887	80042527	+	4579	protein_coding	TTK protein kinase [Source:HGNC Symbol;Acc:HGNC:12401]	-
ENSG00000125730	2.45999	0.193109	4.58121	0.310184	0.235158	C3	19	6677704	6730562	-	8328	protein_coding	complement C3 [Source:HGNC Symbol;Acc:HGNC:1318]	-
ENSG00000175137	10.4086	25.0438	11.4215	24.7058	23.8068	SH3BP5L	1	248810446	248826633	-	6442	protein_coding	SH3 binding domain protein 5 like [Source:HGNC Symbol;Acc:HGNC:29360]	-
ENSG00000145569	17.141	5.31442	9.22922	6.68674	5.22251	OTULINL	5	14581775	14615007	+	4074	protein_coding	OTU deubiquitinase with linear linkage specificity like [Source:HGNC Symbol;Acc:HGNC:25629]	-
ENSG00000184009	1155.35	2541.06	1159.76	2934.12	2842.01	ACTG1	17	81509971	81523847	-	2993	protein_coding	actin gamma 1 [Source:HGNC Symbol;Acc:HGNC:144]	-
ENSG00000123473	0.82296	4.1844	0.790784	2.42538	3.88999	STIL	1	47250139	47314147	-	7291	protein_coding	STIL, centriolar assembly protein [Source:HGNC Symbol;Acc:HGNC:10879]	-
ENSG00000114346	3.60783	10.8765	3.43524	8.0953	10.6505	ECT2	3	172750682	172821474	+	5499	protein_coding	epithelial cell transforming 2 [Source:HGNC Symbol;Acc:HGNC:3155]	-
ENSG00000174684	48.3903	18.5145	37.507	21.4024	19.8583	B4GAT1	11	66345372	66347692	-	2072	protein_coding	beta-1,4-glucuronyltransferase 1 [Source:HGNC Symbol;Acc:HGNC:15685]	-
ENSG00000163840	10.7313	3.12628	8.37582	3.21963	3.54882	DTX3L	3	122564238	122575203	+	5868	protein_coding	deltex E3 ubiquitin ligase 3L [Source:HGNC Symbol;Acc:HGNC:30323]	-
ENSG00000122641	8.04968	20.4227	10.2722	22.6117	27.2346	INHBA	7	41667168	41705834	-	8302	protein_coding	inhibin subunit beta A [Source:HGNC Symbol;Acc:HGNC:6066]	-
ENSG00000090889	0.753987	5.66409	0.673609	4.2253	5.63603	KIF4A	X	70290090	70420832	+	4533	protein_coding	kinesin family member 4A [Source:HGNC Symbol;Acc:HGNC:13339]	-
ENSG00000149948	6.12074	12.9042	7.2465	11.9558	14.6204	HMGA2	12	65824131	65966295	+	15403	protein_coding	high mobility group AT-hook 2 [Source:HGNC Symbol;Acc:HGNC:5009]	HMGI/HMGY
ENSG00000137801	429.575	1043.28	705.049	1165.84	1324.54	THBS1	15	39581079	39599466	+	9158	protein_coding	thrombospondin 1 [Source:HGNC Symbol;Acc:HGNC:11785]	-
ENSG00000130066	42.128	14.9924	105.813	28.5516	16.8232	SAT1	X	23783173	23786226	+	2498	protein_coding	spermidine/spermine N1-acetyltransferase 1 [Source:HGNC Symbol;Acc:HGNC:10540]	-
ENSG00000154839	0.446135	5.52653	0.316573	3.41579	4.83375	SKA1	18	50374995	50394173	+	2950	protein_coding	spindle and kinetochore associated complex subunit 1 [Source:HGNC Symbol;Acc:HGNC:28109]	-
ENSG00000187741	0.524641	2.93021	0.468217	1.7189	2.38828	FANCA	16	89737549	89816657	-	9736	protein_coding	FA complementation group A [Source:HGNC Symbol;Acc:HGNC:3582]	-
ENSG00000140525	1.34599	5.5132	1.16812	3.39259	4.85498	FANCI	15	89243949	89317261	+	7766	protein_coding	FA complementation group I [Source:HGNC Symbol;Acc:HGNC:25568]	-
ENSG00000142657	101.732	43.7428	59.3329	47.5091	53.7547	PGD	1	10398592	10420144	+	2966	protein_coding	phosphogluconate dehydrogenase [Source:HGNC Symbol;Acc:HGNC:8891]	-
ENSG00000197321	10.0957	2.99033	10.1089	3.25923	3.90851	SVIL	10	29457338	29736781	-	9937	protein_coding	supervillin [Source:HGNC Symbol;Acc:HGNC:11480]	-
ENSG00000188486	37.7448	98.6802	25.4581	81.9063	90.4173	H2AFX	11	119093854	119095467	-	1614	protein_coding	H2A histone family member X [Source:HGNC Symbol;Acc:HGNC:4739]	-
ENSG00000156970	0.647496	4.5527	0.638664	2.54222	4.21813	BUB1B	15	40161023	40221136	+	4476	protein_coding	BUB1 mitotic checkpoint serine/threonine kinase B [Source:HGNC Symbol;Acc:HGNC:1149]	-
ENSG00000168502	3.55754	9.14167	4.61088	7.88818	9.2676	MTCL1	18	8705661	8832778	+	12665	protein_coding	microtubule crosslinking factor 1 [Source:HGNC Symbol;Acc:HGNC:29121]	-
ENSG00000073910	3.62573	0.943332	2.31059	1.30165	1.38414	FRY	13	31846713	32299122	+	18849	protein_coding	FRY microtubule binding protein [Source:HGNC Symbol;Acc:HGNC:20367]	-
ENSG00000119403	1.56372	5.73032	1.91211	4.62959	4.86268	PHF19	9	120855652	120894896	-	6733	protein_coding	PHD finger protein 19 [Source:HGNC Symbol;Acc:HGNC:24566]	-
ENSG00000117632	8.8451	23.1633	15.2139	21.2601	20.2251	STMN1	1	25884181	25906991	-	6261	protein_coding	stathmin 1 [Source:HGNC Symbol;Acc:HGNC:6510]	-
ENSG00000111665	0.842617	4.63938	0.75937	3.48703	3.92092	CDCA3	12	6844793	6852066	-	5653	protein_coding	cell division cycle associated 3 [Source:HGNC Symbol;Acc:HGNC:14624]	-
ENSG00000123080	1.41896	8.27375	2.06062	6.35536	7.38058	CDKN2C	1	50960745	50974633	+	3318	protein_coding	cyclin dependent kinase inhibitor 2C [Source:HGNC Symbol;Acc:HGNC:1789]	-
ENSG00000187634	44.6608	20.5216	51.8963	47.8627	37.9325	SAMD11	1	923928	944581	+	4166	protein_coding	sterile alpha motif domain containing 11 [Source:HGNC Symbol;Acc:HGNC:28706]	-
ENSG00000168209	18.1854	3.48137	35.8083	3.93104	2.62779	DDIT4	10	72273920	72276036	+	2058	protein_coding	DNA damage inducible transcript 4 [Source:HGNC Symbol;Acc:HGNC:24944]	-
ENSG00000144959	5.80183	15.4152	3.92407	10.2845	14.8444	NCEH1	3	172630249	172711218	-	4808	protein_coding	neutral cholesterol ester hydrolase 1 [Source:HGNC Symbol;Acc:HGNC:29260]	-
ENSG00000138376	0.480323	3.3754	0.576676	2.16756	3.01659	BARD1	2	214725646	214809711	-	6067	protein_coding	BRCA1 associated RING domain 1 [Source:HGNC Symbol;Acc:HGNC:952]	-
ENSG00000011201	2.65938	0.112316	2.16844	0.0826527	0.203576	ANOS1	X	8528874	8732186	-	7131	protein_coding	anosmin 1 [Source:HGNC Symbol;Acc:HGNC:6211]	-
ENSG00000120129	30.0452	93.7547	39.0664	107.986	97.1518	DUSP1	5	172768090	172771195	-	2019	protein_coding	dual specificity phosphatase 1 [Source:HGNC Symbol;Acc:HGNC:3064]	-
ENSG00000103257	22.1818	8.26237	36.0347	7.74478	10.631	SLC7A5	16	87830023	87869488	-	4745	protein_coding	solute carrier family 7 member 5 [Source:HGNC Symbol;Acc:HGNC:11063]	-
ENSG00000073008	13.2772	31.9311	6.43955	24.5628	29.1194	PVR	19	44643798	44663583	+	3519	protein_coding	poliovirus receptor [Source:HGNC Symbol;Acc:HGNC:9705]	-
ENSG00000164109	1.12831	5.59071	0.989814	5.03679	5.65647	MAD2L1	4	120055608	120067074	-	5748	protein_coding	mitotic arrest deficient 2 like 1 [Source:HGNC Symbol;Acc:HGNC:6763]	-
ENSG00000164619	0.231245	2.12984	0.205685	1.37034	2.17289	BMPER	7	33904308	34156356	+	7919	protein_coding	BMP binding endothelial regulator [Source:HGNC Symbol;Acc:HGNC:24154]	-
ENSG00000109610	6.45962	23.7052	8.52719	30.0666	23.1267	SOD3	4	24789912	24800842	+	2128	protein_coding	superoxide dismutase 3 [Source:HGNC Symbol;Acc:HGNC:11181]	-
ENSG00000138496	4.09936	0.965583	3.28433	1.12826	1.19963	PARP9	3	122527924	122564577	-	8938	protein_coding	poly(ADP-ribose) polymerase family member 9 [Source:HGNC Symbol;Acc:HGNC:24118]	-
ENSG00000253368	167.726	408.736	242.378	365.275	373.603	TRNP1	1	26993707	27000898	+	1976	protein_coding	TMF1-regulated nuclear protein 1 [Source:HGNC Symbol;Acc:HGNC:34348]	-
ENSG00000073712	11.0098	22.6919	9.7428	23.5831	24.7054	FERMT2	14	52857268	52952435	-	8510	protein_coding	fermitin family member 2 [Source:HGNC Symbol;Acc:HGNC:15767]	-
ENSG00000150938	65.3591	141.722	71.3644	115.924	159.291	CRIM1	2	36355926	36551135	+	7122	protein_coding	cysteine rich transmembrane BMP regulator 1 [Source:HGNC Symbol;Acc:HGNC:2359]	-
ENSG00000112029	1.00287	6.19752	0.805594	5.16703	5.57899	FBXO5	6	152970519	152983579	-	3833	protein_coding	F-box protein 5 [Source:HGNC Symbol;Acc:HGNC:13584]	-
ENSG00000115641	11.2291	28.1596	11.2838	32.3255	28.1954	FHL2	2	105357712	105438513	-	6626	protein_coding	four and a half LIM domains 2 [Source:HGNC Symbol;Acc:HGNC:3703]	-
ENSG00000076382	1.46894	6.77638	1.14132	4.83012	6.12668	SPAG5	17	28577565	28599279	-	5472	protein_coding	sperm associated antigen 5 [Source:HGNC Symbol;Acc:HGNC:13452]	-
ENSG00000085999	0.336878	4.63171	0.313982	2.55181	3.17163	RAD54L	1	46247688	46278473	+	3212	protein_coding	RAD54 like [Source:HGNC Symbol;Acc:HGNC:9826]	-
ENSG00000197451	51.4117	112.847	38.3061	99.4017	99.3895	HNRNPAB	5	178204507	178211163	+	2144	protein_coding	heterogeneous nuclear ribonucleoprotein A/B [Source:HGNC Symbol;Acc:HGNC:5034]	-
ENSG00000092820	36.1313	74.6219	22.1289	75.4727	74.8685	EZR	6	158765741	158819412	-	3342	protein_coding	ezrin [Source:HGNC Symbol;Acc:HGNC:12691]	-
ENSG00000198431	133.628	65.8297	63.1936	92.0689	122.657	TXNRD1	12	104215779	104350305	+	6708	protein_coding	thioredoxin reductase 1 [Source:HGNC Symbol;Acc:HGNC:12437]	-
ENSG00000204054	5.25447	1.90123	5.39659	2.31626	2.35141	LINC00963	9	129483451	129513686	+	13171	processed_transcript	long intergenic non-protein coding RNA 963 [Source:HGNC Symbol;Acc:HGNC:48716]	-
ENSG00000170779	4.69252	16.1305	3.66944	13.0386	15.0783	CDCA4	14	105009573	105021148	-	2513	protein_coding	cell division cycle associated 4 [Source:HGNC Symbol;Acc:HGNC:14625]	-
ENSG00000196924	353.655	748.33	438.059	692.08	790.823	FLNA	X	154348524	154374638	-	10585	protein_coding	filamin A [Source:HGNC Symbol;Acc:HGNC:3754]	-
ENSG00000080823	0.849959	3.27076	0.655147	3.62321	3.3865	MOK	14	102224500	102305200	-	10996	protein_coding	MOK protein kinase [Source:HGNC Symbol;Acc:HGNC:9833]	-
ENSG00000177169	30.3879	14.2825	38.8326	14.7388	15.2403	ULK1	12	131894651	131923167	+	7608	protein_coding	unc-51 like autophagy activating kinase 1 [Source:HGNC Symbol;Acc:HGNC:12558]	-
ENSG00000132840	14.6869	4.56078	11.0955	6.97128	6.94727	BHMT2	5	79069717	79089466	+	3182	protein_coding	betaine--homocysteine S-methyltransferase 2 [Source:HGNC Symbol;Acc:HGNC:1048]	-
ENSG00000002834	55.8024	104.366	65.5874	97.5162	103.456	LASP1	17	38869859	38921770	+	7061	protein_coding	LIM and SH3 protein 1 [Source:HGNC Symbol;Acc:HGNC:6513]	-
ENSG00000204291	10.4693	3.47461	14.1926	3.28667	3.60077	COL15A1	9	98943179	99070792	+	6653	protein_coding	collagen type XV alpha 1 chain [Source:HGNC Symbol;Acc:HGNC:2192]	-
ENSG00000180801	4.70174	12.4184	2.72118	10.3824	11.6487	ARSJ	4	113900284	113979727	-	5146	protein_coding	arylsulfatase family member J [Source:HGNC Symbol;Acc:HGNC:26286]	-
ENSG00000180921	4.49653	0.808206	6.35269	0.931186	0.950631	FAM83H	8	143723933	143733801	-	5654	protein_coding	family with sequence similarity 83 member H [Source:HGNC Symbol;Acc:HGNC:24797]	-
ENSG00000117643	4.06173	1.08696	2.86756	1.08597	1.19213	MAN1C1	1	25617468	25786207	+	9026	protein_coding	mannosidase alpha class 1C member 1 [Source:HGNC Symbol;Acc:HGNC:19080]	-
ENSG00000148848	4.82032	12.4982	7.52846	11.3486	14.728	ADAM12	10	126012381	126388455	-	9860	protein_coding	ADAM metallopeptidase domain 12 [Source:HGNC Symbol;Acc:HGNC:190]	-
ENSG00000110031	21.706	50.5825	22.8319	31.0885	45.785	LPXN	11	58526871	58578220	-	2467	protein_coding	leupaxin [Source:HGNC Symbol;Acc:HGNC:14061]	-
ENSG00000122966	0.603031	2.59938	0.832047	1.41523	2.60076	CIT	12	119685790	119877291	-	13230	protein_coding	citron rho-interacting serine/threonine kinase [Source:HGNC Symbol;Acc:HGNC:1985]	-
ENSG00000148634	6.73862	13.5717	6.06516	10.7687	13.0238	HERC4	10	67921899	68075348	-	15847	protein_coding	HECT and RLD domain containing E3 ubiquitin protein ligase 4 [Source:HGNC Symbol;Acc:HGNC:24521]	-
ENSG00000197785	12.8051	31.7914	11.5771	38.4078	29.8808	ATAD3A	1	1512151	1534687	+	3069	protein_coding	ATPase family, AAA domain containing 3A [Source:HGNC Symbol;Acc:HGNC:25567]	-
ENSG00000174371	0.543393	4.29865	0.363548	2.43959	3.22469	EXO1	1	241847967	241895148	+	4140	protein_coding	exonuclease 1 [Source:HGNC Symbol;Acc:HGNC:3511]	-
ENSG00000091986	10.5267	22.6747	14.2364	18.4001	22.0921	CCDC80	3	112596794	112649530	-	13071	protein_coding	coiled-coil domain containing 80 [Source:HGNC Symbol;Acc:HGNC:30649]	-
ENSG00000109099	13.3669	31.2829	12.7833	27.5886	27.9726	PMP22	17	15229777	15265357	-	3222	protein_coding	peripheral myelin protein 22 [Source:HGNC Symbol;Acc:HGNC:9118]	-
ENSG00000137965	13.892	2.95334	13.3291	4.35906	3.13691	IFI44	1	78649796	78664078	+	2038	protein_coding	interferon induced protein 44 [Source:HGNC Symbol;Acc:HGNC:16938]	-
ENSG00000206538	4.69872	10.7959	5.04596	8.89596	11.9002	VGLL3	3	86876388	86991119	-	12714	protein_coding	vestigial like family member 3 [Source:HGNC Symbol;Acc:HGNC:24327]	-
ENSG00000080986	0.971589	5.89466	1.26172	5.01387	5.34078	NDC80	18	2571511	2616635	+	3600	protein_coding	NDC80, kinetochore complex component [Source:HGNC Symbol;Acc:HGNC:16909]	-
ENSG00000168575	7.82115	17.6025	5.97933	13.9684	15.9899	SLC20A2	8	42416475	42541926	-	6641	protein_coding	solute carrier family 20 member 2 [Source:HGNC Symbol;Acc:HGNC:10947]	-
ENSG00000135842	13.3489	5.00437	9.344	3.81015	5.46564	FAM129A	1	184790724	184974550	-	8372	protein_coding	family with sequence similarity 129 member A [Source:HGNC Symbol;Acc:HGNC:16784]	-
ENSG00000073111	2.94418	11.0252	4.29715	6.50571	8.9175	MCM2	3	127598223	127622436	+	4902	protein_coding	minichromosome maintenance complex component 2 [Source:HGNC Symbol;Acc:HGNC:6944]	-
ENSG00000206262	21.5038	8.58249	32.9605	8.79554	10.2074	FOXL2NB	3	138947234	138953451	+	4567	protein_coding	FOXL2 neighbor [Source:HGNC Symbol;Acc:HGNC:34428]	-
ENSG00000138182	0.872893	4.10624	0.794019	2.53052	4.40353	KIF20B	10	89701610	89774939	+	6851	protein_coding	kinesin family member 20B [Source:HGNC Symbol;Acc:HGNC:7212]	-
ENSG00000115758	13.2677	31.845	6.93583	32.1176	30.6354	ODC1	2	10439968	10448504	-	2968	protein_coding	ornithine decarboxylase 1 [Source:HGNC Symbol;Acc:HGNC:8109]	-
ENSG00000165996	5.12749	16.6187	5.65991	19.4527	15.596	HACD1	10	17589032	17617377	-	3857	protein_coding	3-hydroxyacyl-CoA dehydratase 1 [Source:HGNC Symbol;Acc:HGNC:9639]	-
ENSG00000167191	8.39568	2.43061	10.0619	2.19871	2.36553	GPRC5B	16	19856691	19886167	-	6667	protein_coding	G protein-coupled receptor class C group 5 member B [Source:HGNC Symbol;Acc:HGNC:13308]	-
ENSG00000124766	39.1376	16.0032	125.284	28.3615	22.9631	SOX4	6	21592768	21598619	+	5852	protein_coding	SRY-box 4 [Source:HGNC Symbol;Acc:HGNC:11200]	HMG
ENSG00000173207	3.39051	14.0624	3.61467	15.1937	12.2093	CKS1B	1	154974653	154979249	+	2338	protein_coding	CDC28 protein kinase regulatory subunit 1B [Source:HGNC Symbol;Acc:HGNC:19083]	-
ENSG00000130176	8.27295	92.4938	18.2953	140.168	101.461	CNN1	19	11538717	11550323	+	2887	protein_coding	calponin 1 [Source:HGNC Symbol;Acc:HGNC:2155]	-
ENSG00000111335	3.16185	0.0574878	1.98164	0.0379019	0.118896	OAS2	12	112978395	113011723	+	6264	protein_coding	2'-5'-oligoadenylate synthetase 2 [Source:HGNC Symbol;Acc:HGNC:8087]	-
ENSG00000092841	86.4972	185.971	103.338	316.347	160.62	MYL6	12	56158161	56163496	+	4609	protein_coding	myosin light chain 6 [Source:HGNC Symbol;Acc:HGNC:7587]	-
ENSG00000101447	1.36647	8.1071	1.16613	5.59273	8.37371	FAM83D	20	38926312	38953106	+	2475	protein_coding	family with sequence similarity 83 member D [Source:HGNC Symbol;Acc:HGNC:16122]	-
ENSG00000010404	20.4292	9.10219	17.4013	8.41764	10.0201	IDS	X	149476990	149521096	-	9292	protein_coding	iduronate 2-sulfatase [Source:HGNC Symbol;Acc:HGNC:5389]	-
ENSG00000111247	0.626882	7.31576	1.0433	5.38644	5.90085	RAD51AP1	12	4538798	4560048	+	2558	protein_coding	RAD51 associated protein 1 [Source:HGNC Symbol;Acc:HGNC:16956]	-
ENSG00000138413	58.5548	27.2134	38.5466	27.7496	28.3683	IDH1	2	208236227	208266074	-	4721	protein_coding	isocitrate dehydrogenase (NADP(+)) 1, cytosolic [Source:HGNC Symbol;Acc:HGNC:5382]	-
ENSG00000221829	2.35877	9.26392	3.24654	6.76807	6.59597	FANCG	9	35073835	35080016	-	3614	protein_coding	FA complementation group G [Source:HGNC Symbol;Acc:HGNC:3588]	-
ENSG00000130203	36.1795	91.8259	75.4868	174.211	88.2701	APOE	19	44905754	44909393	+	2191	protein_coding	apolipoprotein E [Source:HGNC Symbol;Acc:HGNC:613]	-
ENSG00000184445	0.723301	2.94881	0.975536	1.93297	2.80032	KNTC1	12	122527246	122626396	+	11325	protein_coding	kinetochore associated 1 [Source:HGNC Symbol;Acc:HGNC:17255]	-
ENSG00000164032	37.4344	84.5388	37.833	88.4578	75.7111	H2AFZ	4	99948086	99950388	-	2303	protein_coding	H2A histone family member Z [Source:HGNC Symbol;Acc:HGNC:4741]	-
ENSG00000112715	4.91814	1.6993	9.97213	2.52765	2.01857	VEGFA	6	43770184	43786487	+	14431	protein_coding	vascular endothelial growth factor A [Source:HGNC Symbol;Acc:HGNC:12680]	-
ENSG00000182492	121.067	278.875	214.774	281.28	281.443	BGN	X	153494939	153509554	+	2453	protein_coding	biglycan [Source:HGNC Symbol;Acc:HGNC:1044]	-
ENSG00000196923	77.6984	177.386	84.0572	219.233	182.467	PDLIM7	5	177483394	177497606	-	4407	protein_coding	PDZ and LIM domain 7 [Source:HGNC Symbol;Acc:HGNC:22958]	-
ENSG00000167553	55.7195	110.236	30.1452	98.5165	106.136	TUBA1C	12	49188736	49274603	+	4631	protein_coding	tubulin alpha 1c [Source:HGNC Symbol;Acc:HGNC:20768]	-
ENSG00000215012	4.65842	11.6404	3.22857	10.8889	11.3792	RTL10	22	19846138	19854896	-	6803	protein_coding	retrotransposon Gag like 10 [Source:HGNC Symbol;Acc:HGNC:26112]	-
ENSG00000164938	18.3198	7.17026	22.3497	6.06607	6.90968	TP53INP1	8	94925972	94949411	-	5676	protein_coding	tumor protein p53 inducible nuclear protein 1 [Source:HGNC Symbol;Acc:HGNC:18022]	-
ENSG00000099822	12.8545	4.12543	12.986	4.61346	4.63659	HCN2	19	589893	617159	+	3408	protein_coding	hyperpolarization activated cyclic nucleotide gated potassium and sodium channel 2 [Source:HGNC Symbol;Acc:HGNC:4846]	-
ENSG00000078804	23.8619	9.08871	22.0518	8.46198	10.5601	TP53INP2	20	34704290	34713439	+	4228	protein_coding	tumor protein p53 inducible nuclear protein 2 [Source:HGNC Symbol;Acc:HGNC:16104]	-
ENSG00000145147	0.257104	1.76153	0.165044	0.866719	1.45799	SLIT2	4	20253260	20620561	+	9712	protein_coding	slit guidance ligand 2 [Source:HGNC Symbol;Acc:HGNC:11086]	-
ENSG00000172716	0.899743	4.20877	1.07195	3.21445	4.32624	SLFN11	17	35350305	35373701	-	5982	protein_coding	schlafen family member 11 [Source:HGNC Symbol;Acc:HGNC:26633]	-
ENSG00000135451	0.563182	4.84098	0.655407	3.10191	3.71337	TROAP	12	49323236	49331731	+	3954	protein_coding	trophinin associated protein [Source:HGNC Symbol;Acc:HGNC:12327]	-
ENSG00000094916	4.55503	9.98139	5.81309	7.79686	9.29176	CBX5	12	54230940	54280133	-	15040	protein_coding	chromobox 5 [Source:HGNC Symbol;Acc:HGNC:1555]	-
ENSG00000138778	0.674295	3.1758	0.400442	1.92865	3.44303	CENPE	4	103105806	103198409	-	9444	protein_coding	centromere protein E [Source:HGNC Symbol;Acc:HGNC:1856]	-
ENSG00000137962	3.61748	9.29492	3.62484	8.88416	10.7205	ARHGAP29	1	94148988	94275068	-	15524	protein_coding	Rho GTPase activating protein 29 [Source:HGNC Symbol;Acc:HGNC:30207]	-
ENSG00000115363	9.28968	28.0908	8.29368	32.7141	31.3779	EVA1A	2	75469302	75569722	-	2744	protein_coding	eva-1 homolog A, regulator of programmed cell death [Source:HGNC Symbol;Acc:HGNC:25816]	-
ENSG00000246763	0.610058	7.03995	2.17587	5.03551	7.88551	RGMB-AS1	5	98769618	98773469	-	2344	antisense	RGMB antisense RNA 1 [Source:HGNC Symbol;Acc:HGNC:48666]	-
ENSG00000108829	26.6948	51.856	21.772	49.2877	51.7191	LRRC59	17	50375059	50397553	-	4570	protein_coding	leucine rich repeat containing 59 [Source:HGNC Symbol;Acc:HGNC:28817]	-
ENSG00000140937	6.56745	13.0702	6.44875	11.715	12.9544	CDH11	16	64943753	65126112	-	13381	protein_coding	cadherin 11 [Source:HGNC Symbol;Acc:HGNC:1750]	-
ENSG00000080573	1.3609	5.67567	2.58883	5.47542	4.58576	COL5A3	19	9959561	10010471	-	6750	protein_coding	collagen type V alpha 3 chain [Source:HGNC Symbol;Acc:HGNC:14864]	-
ENSG00000244242	4.35272	0.604077	2.62667	1.83058	1.22335	IFITM10	11	1732410	1750591	-	4784	protein_coding	interferon induced transmembrane protein 10 [Source:HGNC Symbol;Acc:HGNC:40022]	-
ENSG00000119638	15.1249	6.29875	14.2853	7.01926	7.98129	NEK9	14	75079353	75127344	-	10787	protein_coding	NIMA related kinase 9 [Source:HGNC Symbol;Acc:HGNC:18591]	-
ENSG00000078401	0.286962	6.49032	0.608787	7.29483	7.65379	EDN1	6	12290363	12297194	+	2033	protein_coding	endothelin 1 [Source:HGNC Symbol;Acc:HGNC:3176]	-
ENSG00000146411	3.57695	0.314314	3.91056	0.493336	0.568271	SLC2A12	6	133988697	134052636	-	4468	protein_coding	solute carrier family 2 member 12 [Source:HGNC Symbol;Acc:HGNC:18067]	-
ENSG00000105486	2.20529	6.73758	3.543	5.79712	5.84121	LIG1	19	48115445	48170603	-	6576	protein_coding	DNA ligase 1 [Source:HGNC Symbol;Acc:HGNC:6598]	-
ENSG00000165490	0.299212	2.7048	0.206488	1.68351	2.35502	DDIAS	11	82899975	82958277	+	5339	protein_coding	DNA damage induced apoptosis suppressor [Source:HGNC Symbol;Acc:HGNC:26351]	-
ENSG00000161888	0.868967	5.97598	1.05667	5.5184	4.56344	SPC24	19	11131520	11155808	-	2839	protein_coding	SPC24, NDC80 kinetochore complex component [Source:HGNC Symbol;Acc:HGNC:26913]	-
ENSG00000131737	0.524377	8.27931	0.506461	8.28649	8.69949	KRT34	17	41377650	41382403	-	1751	protein_coding	keratin 34 [Source:HGNC Symbol;Acc:HGNC:6452]	-
ENSG00000131153	0.656957	5.52272	0.845404	5.14505	4.05263	GINS2	16	85676198	85690073	-	3264	protein_coding	GINS complex subunit 2 [Source:HGNC Symbol;Acc:HGNC:24575]	-
ENSG00000173457	80.7398	177.368	105.546	244.638	156.854	PPP1R14B	11	64244480	64246941	-	1655	protein_coding	protein phosphatase 1 regulatory inhibitor subunit 14B [Source:HGNC Symbol;Acc:HGNC:9057]	-
ENSG00000116260	80.1308	40.1266	88.1474	50.9526	44.0063	QSOX1	1	180154834	180204030	+	9311	protein_coding	quiescin sulfhydryl oxidase 1 [Source:HGNC Symbol;Acc:HGNC:9756]	-
ENSG00000146250	10.9804	2.40349	8.52001	2.00896	1.73029	PRSS35	6	83512538	83525704	+	2440	protein_coding	serine protease 35 [Source:HGNC Symbol;Acc:HGNC:21387]	-
ENSG00000092068	21.4768	8.99575	21.2857	7.18425	9.36519	SLC7A8	14	23125295	23183674	-	5991	protein_coding	solute carrier family 7 member 8 [Source:HGNC Symbol;Acc:HGNC:11066]	-
ENSG00000149596	2.13002	6.83903	1.8769	8.81353	8.51197	JPH2	20	44111695	44187578	-	5943	protein_coding	junctophilin 2 [Source:HGNC Symbol;Acc:HGNC:14202]	-
ENSG00000128917	0.0592504	2.80942	0.158392	1.03865	1.42787	DLL4	15	40929333	40939073	+	4761	protein_coding	delta like canonical Notch ligand 4 [Source:HGNC Symbol;Acc:HGNC:2910]	-
ENSG00000143228	0.460388	4.1741	0.442055	2.58804	3.79678	NUF2	1	163266576	163355764	+	3362	protein_coding	NUF2, NDC80 kinetochore complex component [Source:HGNC Symbol;Acc:HGNC:14621]	-
ENSG00000122707	15.1879	29.4796	19.8043	32.5902	34.4492	RECK	9	36036433	36124451	+	6045	protein_coding	reversion inducing cysteine rich protein with kazal motifs [Source:HGNC Symbol;Acc:HGNC:11345]	-
ENSG00000163507	1.13561	5.18128	1.01584	3.27133	4.79243	CIP2A	3	108549869	108589644	-	4579	protein_coding	cell proliferation regulating inhibitor of protein phosphatase 2A [Source:HGNC Symbol;Acc:HGNC:29302]	-
ENSG00000112312	3.34227	12.508	3.83835	10.2253	10.0176	GMNN	6	24774931	24786099	+	2476	protein_coding	geminin, DNA replication inhibitor [Source:HGNC Symbol;Acc:HGNC:17493]	-
ENSG00000162591	6.11869	19.5851	16.5813	24.3589	22.694	MEGF6	1	3489920	3611495	-	7039	protein_coding	multiple EGF like domains 6 [Source:HGNC Symbol;Acc:HGNC:3232]	-
ENSG00000115963	125.19	264.501	241.615	274.022	289.643	RND3	2	150468195	150539011	-	3594	protein_coding	Rho family GTPase 3 [Source:HGNC Symbol;Acc:HGNC:671]	-
ENSG00000118971	3.13828	0.460483	3.87222	0.481584	0.41574	CCND2	12	4273772	4305350	+	7157	protein_coding	cyclin D2 [Source:HGNC Symbol;Acc:HGNC:1583]	-
ENSG00000102384	0.481771	3.61647	0.423069	2.00825	3.54938	CENPI	X	101098218	101163681	+	4321	protein_coding	centromere protein I [Source:HGNC Symbol;Acc:HGNC:3968]	-
ENSG00000154734	45.2902	98.0041	87.3854	144.061	135.449	ADAMTS1	21	26835747	26845409	-	7063	protein_coding	ADAM metallopeptidase with thrombospondin type 1 motif 1 [Source:HGNC Symbol;Acc:HGNC:217]	-
ENSG00000134247	9.88357	3.66271	9.58038	4.36951	4.48815	PTGFRN	1	116910057	116990358	+	6352	protein_coding	prostaglandin F2 receptor inhibitor [Source:HGNC Symbol;Acc:HGNC:9601]	-
ENSG00000164649	2.25305	7.91042	1.96204	5.21315	7.29519	CDCA7L	7	21900900	21946084	-	4074	protein_coding	cell division cycle associated 7 like [Source:HGNC Symbol;Acc:HGNC:30777]	-
ENSG00000165410	14.7035	27.9838	12.9489	28.4646	27.1518	CFL2	14	34706769	34714823	-	7179	protein_coding	cofilin 2 [Source:HGNC Symbol;Acc:HGNC:1875]	-
ENSG00000137628	4.59243	0.948515	4.00785	1.24406	1.20812	DDX60	4	168216293	168318807	-	6750	protein_coding	DExD/H-box helicase 60 [Source:HGNC Symbol;Acc:HGNC:25942]	-
ENSG00000197879	40.7096	76.6226	41.6276	67.5202	78.1138	MYO1C	17	1464186	1492812	-	8106	protein_coding	myosin IC [Source:HGNC Symbol;Acc:HGNC:7597]	-
ENSG00000076003	7.39916	18.8215	4.78248	13.1012	16.5074	MCM6	2	135839626	135876426	-	4118	protein_coding	minichromosome maintenance complex component 6 [Source:HGNC Symbol;Acc:HGNC:6949]	-
ENSG00000188112	0.537043	2.83431	1.26132	2.45293	2.57317	C6orf132	6	42101118	42142619	-	6852	protein_coding	chromosome 6 open reading frame 132 [Source:HGNC Symbol;Acc:HGNC:21288]	-
ENSG00000134531	21.1731	39.0332	20.4743	34.2646	38.3762	EMP1	12	13196716	13219939	+	7838	protein_coding	epithelial membrane protein 1 [Source:HGNC Symbol;Acc:HGNC:3333]	-
ENSG00000196139	4.02908	0.537558	6.05796	2.03621	1.23788	AKR1C3	10	5035354	5107686	+	4532	protein_coding	aldo-keto reductase family 1 member C3 [Source:HGNC Symbol;Acc:HGNC:386]	-
ENSG00000012048	0.695886	2.82371	0.54196	1.72291	2.67272	BRCA1	17	43044295	43170245	-	9187	protein_coding	BRCA1, DNA repair associated [Source:HGNC Symbol;Acc:HGNC:1100]	-
ENSG00000166887	20.9	10.5244	17.8809	11.1003	11.3299	VPS39	15	42158701	42208316	-	8354	protein_coding	VPS39, HOPS complex subunit [Source:HGNC Symbol;Acc:HGNC:20593]	-
ENSG00000159674	318.935	147.2	410.692	199.705	152.344	SPON2	4	1166932	1208962	-	6013	protein_coding	spondin 2 [Source:HGNC Symbol;Acc:HGNC:11253]	-
ENSG00000203668	0.46134	2.51158	0.919647	2.0989	2.53641	CHML	1	241628853	241640254	-	7661	protein_coding	CHM like, Rab escort protein 2 [Source:HGNC Symbol;Acc:HGNC:1941]	-
ENSG00000163874	10.9467	3.16537	13.4864	3.96604	3.38519	ZC3H12A	1	37474552	37484379	+	3121	protein_coding	zinc finger CCCH-type containing 12A [Source:HGNC Symbol;Acc:HGNC:26259]	-
ENSG00000256663	1.59023	11.6703	1.13159	6.93454	10.018	AC112777.1	12	20551590	20553012	+	1423	processed_pseudogene	ubiquitin-like with PHD and ring finger domains 1 (UHRF1) pseudogene	-
ENSG00000167747	5.74662	16.2644	5.38105	16.516	12.54	C19orf48	19	50797704	50804929	-	3256	protein_coding	chromosome 19 open reading frame 48 [Source:HGNC Symbol;Acc:HGNC:29667]	-
ENSG00000134107	20.3926	8.76244	13.5009	7.97392	11.4716	BHLHE40	3	4979116	4985323	+	3837	protein_coding	basic helix-loop-helix family member e40 [Source:HGNC Symbol;Acc:HGNC:1046]	bHLH
ENSG00000143162	32.7098	14.8335	25.6126	16.9515	15.707	CREG1	1	167529117	167553805	-	3286	protein_coding	cellular repressor of E1A stimulated genes 1 [Source:HGNC Symbol;Acc:HGNC:2351]	-
ENSG00000130402	108.679	206.574	108.554	172.287	205.464	ACTN4	19	38647649	38731583	+	6098	protein_coding	actinin alpha 4 [Source:HGNC Symbol;Acc:HGNC:166]	-
ENSG00000087086	13409.7	7033.3	10525.2	9754.72	7822.12	FTL	19	48965301	48966878	+	878	protein_coding	ferritin light chain [Source:HGNC Symbol;Acc:HGNC:3999]	-
ENSG00000114019	13.3387	30.2698	5.97284	25.4023	31.2246	AMOTL2	3	134355874	134375479	-	5984	protein_coding	angiomotin like 2 [Source:HGNC Symbol;Acc:HGNC:17812]	-
ENSG00000075618	91.035	185.927	137.287	184.14	196.198	FSCN1	7	5592823	5606655	+	3692	protein_coding	fascin actin-bundling protein 1 [Source:HGNC Symbol;Acc:HGNC:11148]	-
ENSG00000165891	4.63278	11.7637	9.40147	6.40194	11.0225	E2F7	12	77021247	77065580	-	6303	protein_coding	E2F transcription factor 7 [Source:HGNC Symbol;Acc:HGNC:23820]	E2F
ENSG00000064687	3.47086	0.856935	3.61393	1.05801	0.755024	ABCA7	19	1040101	1065572	+	8367	protein_coding	ATP binding cassette subfamily A member 7 [Source:HGNC Symbol;Acc:HGNC:37]	-
ENSG00000112414	0.635233	2.68124	0.546605	1.56014	2.39248	ADGRG6	6	142301854	142446266	+	8473	protein_coding	adhesion G protein-coupled receptor G6 [Source:HGNC Symbol;Acc:HGNC:13841]	-
ENSG00000136842	9.37813	2.51082	15.9588	5.01288	3.56414	TMOD1	9	97501180	97601748	+	3708	protein_coding	tropomodulin 1 [Source:HGNC Symbol;Acc:HGNC:11871]	-
ENSG00000100196	20.2353	47.392	29.0031	50.4633	53.3874	KDELR3	22	38468062	38483447	+	1929	protein_coding	KDEL endoplasmic reticulum protein retention receptor 3 [Source:HGNC Symbol;Acc:HGNC:6306]	-
ENSG00000079616	3.00606	9.9532	3.38006	8.69782	8.7798	KIF22	16	29790719	29805385	+	4312	protein_coding	kinesin family member 22 [Source:HGNC Symbol;Acc:HGNC:6391]	-
ENSG00000168461	24.1944	10.8983	24.0066	12.0798	11.9886	RAB31	18	9708165	9862551	+	5586	protein_coding	RAB31, member RAS oncogene family [Source:HGNC Symbol;Acc:HGNC:9771]	-
ENSG00000178860	14.6529	4.07895	14.4736	7.7918	6.11426	MSC	8	71841549	71844468	-	2113	protein_coding	musculin [Source:HGNC Symbol;Acc:HGNC:7321]	bHLH
ENSG00000171320	0.192363	1.71804	0.15075	1.1339	1.69798	ESCO2	8	27771949	27812640	+	7973	protein_coding	establishment of sister chromatid cohesion N-acetyltransferase 2 [Source:HGNC Symbol;Acc:HGNC:27230]	-
ENSG00000131669	43.7487	17.1508	50.1306	24.3986	18.274	NINJ1	9	93121489	93134288	-	2648	protein_coding	ninjurin 1 [Source:HGNC Symbol;Acc:HGNC:7824]	-
ENSG00000228630	18.4306	6.146	19.6752	8.33114	6.12318	HOTAIR	12	53962308	53974956	-	2602	antisense	HOX transcript antisense RNA [Source:HGNC Symbol;Acc:HGNC:33510]	-
ENSG00000171867	168.958	93.1485	137.398	105.459	97.0757	PRNP	20	4686236	4701590	+	2851	protein_coding	prion protein [Source:HGNC Symbol;Acc:HGNC:9449]	-
ENSG00000154096	40.6893	78.478	49.3191	86.9967	77.8696	THY1	11	119417378	119424985	-	5925	protein_coding	Thy-1 cell surface antigen [Source:HGNC Symbol;Acc:HGNC:11801]	-
ENSG00000006007	40.263	20.8179	31.354	19.7648	22.0714	GDE1	16	19501689	19522145	-	4416	protein_coding	glycerophosphodiester phosphodiesterase 1 [Source:HGNC Symbol;Acc:HGNC:29644]	-
ENSG00000128283	22.4503	55.6676	28.5162	68.5754	62.7848	CDC42EP1	22	37560447	37569405	+	2573	protein_coding	CDC42 effector protein 1 [Source:HGNC Symbol;Acc:HGNC:17014]	-
ENSG00000146263	0.281114	1.20142	0.264867	0.783244	1.10157	MMS22L	6	97142161	97283217	-	21793	protein_coding	MMS22 like, DNA repair protein [Source:HGNC Symbol;Acc:HGNC:21475]	-
ENSG00000186871	0.289828	2.90632	0.203931	1.68137	2.53565	ERCC6L	X	72204657	72239047	-	4364	protein_coding	ERCC excision repair 6 like, spindle assembly checkpoint helicase [Source:HGNC Symbol;Acc:HGNC:20794]	-
ENSG00000175938	19.3443	6.41344	18.5767	6.82949	6.45998	ORAI3	16	30949066	30956461	+	2643	protein_coding	ORAI calcium release-activated calcium modulator 3 [Source:HGNC Symbol;Acc:HGNC:28185]	-
ENSG00000133872	105.367	53.5	91.7689	61.6514	53.6575	SARAF	8	30063012	30083208	-	2990	protein_coding	store-operated calcium entry associated regulatory factor [Source:HGNC Symbol;Acc:HGNC:28789]	-
ENSG00000132780	5.01277	10.6193	5.01637	10.3964	9.44634	NASP	1	45583846	45618904	+	8304	protein_coding	nuclear autoantigenic sperm protein [Source:HGNC Symbol;Acc:HGNC:7644]	-
ENSG00000123562	81.597	150.468	88.8619	148.631	153.946	MORF4L2	X	103675496	103688158	-	2648	protein_coding	mortality factor 4 like 2 [Source:HGNC Symbol;Acc:HGNC:16849]	-
ENSG00000104687	37.472	17.3765	25.6738	24.0336	22.5219	GSR	8	30678061	30727999	-	3760	protein_coding	glutathione-disulfide reductase [Source:HGNC Symbol;Acc:HGNC:4623]	-
ENSG00000070950	1.11802	4.22887	1.37125	3.10849	3.69901	RAD18	3	8775402	8963773	-	6983	protein_coding	RAD18, E3 ubiquitin protein ligase [Source:HGNC Symbol;Acc:HGNC:18278]	-
ENSG00000185885	37.5138	9.54973	40.2652	13.3642	9.97929	IFITM1	11	313506	315272	+	1080	protein_coding	interferon induced transmembrane protein 1 [Source:HGNC Symbol;Acc:HGNC:5412]	-
ENSG00000095383	13.8684	31.4505	12.7584	27.5338	30.7831	TBC1D2	9	98198999	98255721	-	3681	protein_coding	TBC1 domain family member 2 [Source:HGNC Symbol;Acc:HGNC:18026]	-
ENSG00000075651	1.89484	0.400581	1.99594	0.443561	0.389898	PLD1	3	171600405	171810950	-	12859	protein_coding	phospholipase D1 [Source:HGNC Symbol;Acc:HGNC:9067]	-
ENSG00000166483	2.30297	7.38457	5.10194	6.18514	6.9734	WEE1	11	9573681	9593457	+	9239	protein_coding	WEE1 G2 checkpoint kinase [Source:HGNC Symbol;Acc:HGNC:12761]	-
ENSG00000143344	13.9952	5.64021	16.2904	5.94101	6.08429	RGL1	1	183636085	183928531	+	5305	protein_coding	ral guanine nucleotide dissociation stimulator like 1 [Source:HGNC Symbol;Acc:HGNC:30281]	-
ENSG00000188643	76.382	157.132	79.0554	185.508	152.624	S100A16	1	153606886	153613145	-	1701	protein_coding	S100 calcium binding protein A16 [Source:HGNC Symbol;Acc:HGNC:20441]	-
ENSG00000144354	0.325318	3.21305	0.250143	2.78018	3.39906	CDCA7	2	173354820	173368997	+	3934	protein_coding	cell division cycle associated 7 [Source:HGNC Symbol;Acc:HGNC:14628]	-
ENSG00000149636	3.24239	10.8435	3.7016	8.99131	9.243	DSN1	20	36751791	36773818	-	2739	protein_coding	DSN1 homolog, MIS12 kinetochore complex component [Source:HGNC Symbol;Acc:HGNC:16165]	-
ENSG00000174442	2.00491	6.93184	1.4628	5.21469	6.29831	ZWILCH	15	66504959	66550128	+	4849	protein_coding	zwilch kinetochore protein [Source:HGNC Symbol;Acc:HGNC:25468]	-
ENSG00000068028	5.84842	16.6287	6.20951	17.2854	14.3094	RASSF1	3	50329782	50340980	-	3683	protein_coding	Ras association domain family member 1 [Source:HGNC Symbol;Acc:HGNC:9882]	-
ENSG00000106462	1.14559	5.57531	1.12224	4.39052	4.8287	EZH2	7	148807383	148884321	-	4522	protein_coding	enhancer of zeste 2 polycomb repressive complex 2 subunit [Source:HGNC Symbol;Acc:HGNC:3527]	-
ENSG00000139618	0.154541	1.1485	0.187608	0.762917	1.20294	BRCA2	13	32315474	32400266	+	12273	protein_coding	BRCA2, DNA repair associated [Source:HGNC Symbol;Acc:HGNC:1101]	-
ENSG00000103187	62.1309	117.339	75.3259	131.008	119.84	COTL1	16	84565594	84618077	-	6762	protein_coding	coactosin like F-actin binding protein 1 [Source:HGNC Symbol;Acc:HGNC:18304]	-
ENSG00000089280	16.0514	29.229	11.5858	28.2257	24.5849	FUS	16	31180110	31194871	+	10283	protein_coding	FUS RNA binding protein [Source:HGNC Symbol;Acc:HGNC:4010]	-
ENSG00000164045	0.780739	4.17597	0.434005	2.91369	3.1335	CDC25A	3	48157146	48188402	-	4117	protein_coding	cell division cycle 25A [Source:HGNC Symbol;Acc:HGNC:1725]	-
ENSG00000186815	9.87848	4.4016	9.75495	4.71967	4.92585	TPCN1	12	113221050	113298585	+	8728	protein_coding	two pore segment channel 1 [Source:HGNC Symbol;Acc:HGNC:18182]	-
ENSG00000147065	95.8982	170.598	107.327	123.802	170.354	MSN	X	65588377	65741931	+	5971	protein_coding	moesin [Source:HGNC Symbol;Acc:HGNC:7373]	-
ENSG00000159251	1.49026	7.217	4.80461	31.4495	19.5247	ACTC1	15	34788095	34795726	-	4602	protein_coding	actin, alpha, cardiac muscle 1 [Source:HGNC Symbol;Acc:HGNC:143]	-
ENSG00000130821	37.5609	19.4384	39.7507	20.0098	18.6605	SLC6A8	X	153688099	153696593	+	5498	protein_coding	solute carrier family 6 member 8 [Source:HGNC Symbol;Acc:HGNC:11055]	-
ENSG00000117143	10.7176	26.6735	11.0105	27.1674	27.8127	UAP1	1	162561506	162599842	+	3437	protein_coding	UDP-N-acetylglucosamine pyrophosphorylase 1 [Source:HGNC Symbol;Acc:HGNC:12457]	-
ENSG00000142731	0.454086	3.6407	0.423824	2.54132	3.248	PLK4	4	127880861	127899195	+	4482	protein_coding	polo like kinase 4 [Source:HGNC Symbol;Acc:HGNC:11397]	-
ENSG00000123374	4.77581	13.5104	4.84676	10.9122	12.7071	CDK2	12	55966769	55972784	+	3894	protein_coding	cyclin dependent kinase 2 [Source:HGNC Symbol;Acc:HGNC:1771]	-
ENSG00000100162	1.21961	8.62055	1.68106	7.64638	6.86993	CENPM	22	41938721	41947164	-	1778	protein_coding	centromere protein M [Source:HGNC Symbol;Acc:HGNC:18352]	-
ENSG00000048392	25.3121	12.5868	23.3533	11.8969	13.7368	RRM2B	8	102204502	102239118	-	5548	protein_coding	ribonucleotide reductase regulatory TP53 inducible subunit M2B [Source:HGNC Symbol;Acc:HGNC:17296]	-
ENSG00000006016	5.51628	15.4997	8.82733	24.929	16.1612	CRLF1	19	18572220	18607741	-	3018	protein_coding	cytokine receptor like factor 1 [Source:HGNC Symbol;Acc:HGNC:2364]	-
ENSG00000102996	9.64991	3.49583	7.32523	3.16923	3.48593	MMP15	16	58025566	58046901	+	4419	protein_coding	matrix metallopeptidase 15 [Source:HGNC Symbol;Acc:HGNC:7161]	-
ENSG00000184661	0.776034	4.64115	0.77462	3.01023	4.34932	CDCA2	8	25458997	25507920	+	3908	protein_coding	cell division cycle associated 2 [Source:HGNC Symbol;Acc:HGNC:14623]	-
ENSG00000137103	3.76282	1.48041	3.43491	1.84759	1.83313	TMEM8B	9	35814451	35865518	+	16165	protein_coding	transmembrane protein 8B [Source:HGNC Symbol;Acc:HGNC:21427]	-
ENSG00000147224	15.3541	34.5419	11.7674	33.0809	32.462	PRPS1	X	107628424	107651026	+	2623	protein_coding	phosphoribosyl pyrophosphate synthetase 1 [Source:HGNC Symbol;Acc:HGNC:9462]	-
ENSG00000163918	2.26056	9.03784	2.16908	8.7997	8.43491	RFC4	3	186789880	186807058	-	2997	protein_coding	replication factor C subunit 4 [Source:HGNC Symbol;Acc:HGNC:9972]	-
ENSG00000116649	72.5495	150.493	68.8199	161.42	145.609	SRM	1	11054584	11060024	-	1898	protein_coding	spermidine synthase [Source:HGNC Symbol;Acc:HGNC:11296]	-
ENSG00000074416	12.8344	26.5923	12.9398	18.051	24.6934	MGLL	3	127689062	128052190	-	11849	protein_coding	monoglyceride lipase [Source:HGNC Symbol;Acc:HGNC:17038]	-
ENSG00000091490	5.2569	1.80017	5.65826	1.73124	2.26635	SEL1L3	4	25747427	25863760	-	7489	protein_coding	SEL1L family member 3 [Source:HGNC Symbol;Acc:HGNC:29108]	-
ENSG00000182963	3.84156	9.58814	4.15807	8.45124	9.36672	GJC1	17	44798448	44830816	-	8660	protein_coding	gap junction protein gamma 1 [Source:HGNC Symbol;Acc:HGNC:4280]	-
ENSG00000136153	11.8319	21.3831	6.37224	18.9189	23.0366	LMO7	13	75620434	75859870	+	14367	protein_coding	LIM domain 7 [Source:HGNC Symbol;Acc:HGNC:6646]	-
ENSG00000072571	0.723925	4.22356	0.531953	2.26831	4.56907	HMMR	5	163460203	163491945	+	3936	protein_coding	hyaluronan mediated motility receptor [Source:HGNC Symbol;Acc:HGNC:5012]	-
ENSG00000012822	16.8524	8.73332	28.1614	7.82051	8.7939	CALCOCO1	12	53708517	53727745	-	8898	protein_coding	calcium binding and coiled-coil domain 1 [Source:HGNC Symbol;Acc:HGNC:29306]	-
ENSG00000065911	4.87902	11.9686	4.92199	11.3168	12.6377	MTHFD2	2	74198562	74217565	+	4870	protein_coding	methylenetetrahydrofolate dehydrogenase (NADP+ dependent) 2, methenyltetrahydrofolate cyclohydrolase [Source:HGNC Symbol;Acc:HGNC:7434]	-
ENSG00000008405	1.47412	5.31062	1.00459	4.28808	5.27286	CRY1	12	106991364	107093829	-	5062	protein_coding	cryptochrome circadian regulator 1 [Source:HGNC Symbol;Acc:HGNC:2384]	-
ENSG00000070404	13.0853	35.3378	18.5579	54.8204	38.1503	FSTL3	19	676365	683399	+	3067	protein_coding	follistatin like 3 [Source:HGNC Symbol;Acc:HGNC:3973]	-
ENSG00000011304	36.5594	63.8852	34.7675	51.9134	60.3584	PTBP1	19	797075	812327	+	6883	protein_coding	polypyrimidine tract binding protein 1 [Source:HGNC Symbol;Acc:HGNC:9583]	-
ENSG00000121060	17.0472	6.65927	10.7894	5.40717	6.89029	TRIM25	17	56836387	56914080	-	9501	protein_coding	tripartite motif containing 25 [Source:HGNC Symbol;Acc:HGNC:12932]	-
ENSG00000166801	2.36515	6.17227	2.22728	3.76745	5.3079	FAM111A	11	59142748	59155039	+	7221	protein_coding	family with sequence similarity 111 member A [Source:HGNC Symbol;Acc:HGNC:24725]	-
ENSG00000143549	37.3837	65.9712	34.2681	64.1069	64.0265	TPM3	1	154155304	154194648	-	8389	protein_coding	tropomyosin 3 [Source:HGNC Symbol;Acc:HGNC:12012]	-
ENSG00000198959	21.0881	44.1129	22.6924	50.993	54.3291	TGM2	20	38127387	38166578	-	8036	protein_coding	transglutaminase 2 [Source:HGNC Symbol;Acc:HGNC:11778]	-
ENSG00000101367	40.8926	74.4873	28.3709	71.7185	74.7259	MAPRE1	20	32819893	32850405	+	2623	protein_coding	microtubule associated protein RP/EB family member 1 [Source:HGNC Symbol;Acc:HGNC:6890]	-
ENSG00000142173	596.859	1193.86	948.903	1532.53	1219.66	COL6A2	21	46098097	46132849	+	5386	protein_coding	collagen type VI alpha 2 chain [Source:HGNC Symbol;Acc:HGNC:2212]	-
ENSG00000159167	15.8082	6.21329	41.4717	9.64972	9.61339	STC1	8	23841915	23854807	-	4149	protein_coding	stanniocalcin 1 [Source:HGNC Symbol;Acc:HGNC:11373]	-
ENSG00000013573	1.52162	4.59588	1.73392	3.28305	4.21162	DDX11	12	31073845	31104791	+	8374	protein_coding	DEAD/H-box helicase 11 [Source:HGNC Symbol;Acc:HGNC:2736]	-
ENSG00000108950	2.43252	0.375168	3.44073	0.4589	0.370099	FAM20A	17	68535113	68601389	-	6203	protein_coding	FAM20A, golgi associated secretory pathway pseudokinase [Source:HGNC Symbol;Acc:HGNC:23015]	-
ENSG00000182179	6.00073	1.55916	6.56154	2.82876	2.12693	UBA7	3	49805207	49813946	-	4545	protein_coding	ubiquitin like modifier activating enzyme 7 [Source:HGNC Symbol;Acc:HGNC:12471]	-
ENSG00000148677	0.19314	4.94566	0.0607392	2.6013	4.14941	ANKRD1	10	90912096	90921276	-	1979	protein_coding	ankyrin repeat domain 1 [Source:HGNC Symbol;Acc:HGNC:15819]	-
ENSG00000163584	6.40459	17.9809	5.92909	22.036	17.1041	RPL22L1	3	170864875	170870483	-	2326	protein_coding	ribosomal protein L22 like 1 [Source:HGNC Symbol;Acc:HGNC:27610]	-
ENSG00000138760	25.9955	14.8596	23.458	14.0579	16.2435	SCARB2	4	76158733	76234536	-	19341	protein_coding	scavenger receptor class B member 2 [Source:HGNC Symbol;Acc:HGNC:1665]	-
ENSG00000175455	4.4914	9.36751	6.64395	8.0917	9.06369	CCDC14	3	123897305	123961408	-	11423	protein_coding	coiled-coil domain containing 14 [Source:HGNC Symbol;Acc:HGNC:25766]	-
ENSG00000006327	82.7863	172.808	42.9916	190.642	161.608	TNFRSF12A	16	3018445	3022383	+	1848	protein_coding	TNF receptor superfamily member 12A [Source:HGNC Symbol;Acc:HGNC:18152]	-
ENSG00000198408	34.4063	17.0561	24.3632	17.288	19.6806	OGA	10	101784443	101818465	-	7247	protein_coding	O-GlcNAcase [Source:HGNC Symbol;Acc:HGNC:7056]	-
ENSG00000119681	98.5938	186.16	140.543	151.872	205.879	LTBP2	14	74498170	74612378	-	9091	protein_coding	latent transforming growth factor beta binding protein 2 [Source:HGNC Symbol;Acc:HGNC:6715]	-
ENSG00000035403	44.0542	79.9341	36.1825	63.5069	84.6093	VCL	10	73995193	74121363	+	9992	protein_coding	vinculin [Source:HGNC Symbol;Acc:HGNC:12665]	-
ENSG00000146859	12.0955	3.23504	9.22645	3.34494	3.87651	TMEM140	7	135148072	135166215	+	2313	protein_coding	transmembrane protein 140 [Source:HGNC Symbol;Acc:HGNC:21870]	-
ENSG00000163565	22.8381	11.4567	28.1523	10.2114	11.4903	IFI16	1	158999968	159055155	+	5294	protein_coding	interferon gamma inducible protein 16 [Source:HGNC Symbol;Acc:HGNC:5395]	-
ENSG00000099860	9.36654	24.7534	6.08582	34.3302	17.1749	GADD45B	19	2476122	2478259	+	2138	protein_coding	growth arrest and DNA damage inducible beta [Source:HGNC Symbol;Acc:HGNC:4096]	-
ENSG00000122378	11.7062	4.87992	13.6862	5.78104	5.36975	PRXL2A	10	80407829	80437115	+	6520	protein_coding	peroxiredoxin like 2A [Source:HGNC Symbol;Acc:HGNC:28651]	-
ENSG00000214706	12.5985	27.1937	9.73146	26.666	23.7141	IFRD2	3	50287732	50292918	-	3712	protein_coding	interferon related developmental regulator 2 [Source:HGNC Symbol;Acc:HGNC:5457]	-
ENSG00000138347	0.269538	2.04732	0.309796	1.95421	2.44026	MYPN	10	68106117	68212017	+	7060	protein_coding	myopalladin [Source:HGNC Symbol;Acc:HGNC:23246]	-
ENSG00000167779	79.935	208.152	165.644	385.289	194.224	IGFBP6	12	53097436	53102345	+	1346	protein_coding	insulin like growth factor binding protein 6 [Source:HGNC Symbol;Acc:HGNC:5475]	-
ENSG00000205208	2.31637	7.57037	2.09665	4.57577	6.6798	C4orf46	4	158666679	158672255	-	3730	protein_coding	chromosome 4 open reading frame 46 [Source:HGNC Symbol;Acc:HGNC:27320]	-
ENSG00000112378	49.5611	26.9947	46.7221	27.4995	27.5489	PERP	6	138088505	138107511	-	4290	protein_coding	PERP, TP53 apoptosis effector [Source:HGNC Symbol;Acc:HGNC:17637]	-
ENSG00000105329	146.395	72.2383	214.856	89.7887	74.6655	TGFB1	19	41301587	41353911	-	3238	protein_coding	transforming growth factor beta 1 [Source:HGNC Symbol;Acc:HGNC:11766]	-
ENSG00000136108	5.0178	13.6257	3.35692	9.89454	13.4117	CKAP2	13	52455429	52476628	+	4547	protein_coding	cytoskeleton associated protein 2 [Source:HGNC Symbol;Acc:HGNC:1990]	-
ENSG00000141376	2.55273	0.838565	2.41584	0.860179	1.02499	BCAS3	17	60677453	61392838	+	14101	protein_coding	BCAS3, microtubule associated cell migration factor [Source:HGNC Symbol;Acc:HGNC:14347]	-
ENSG00000185112	65.0169	26.9176	154.729	43.451	35.2193	FAM43A	3	194686544	194689037	+	2494	protein_coding	family with sequence similarity 43 member A [Source:HGNC Symbol;Acc:HGNC:26888]	-
ENSG00000101608	47.4653	100.655	50.3208	131.394	95.833	MYL12A	18	3247481	3256236	+	3245	protein_coding	myosin light chain 12A [Source:HGNC Symbol;Acc:HGNC:16701]	-
ENSG00000196230	354.002	602.723	358.759	527.976	559.38	TUBB	6	30720201	30725426	+	3359	protein_coding	tubulin beta class I [Source:HGNC Symbol;Acc:HGNC:20778]	-
ENSG00000062822	4.27233	11.4286	4.26605	9.14908	9.97401	POLD1	19	50384204	50418016	+	4932	protein_coding	DNA polymerase delta 1, catalytic subunit [Source:HGNC Symbol;Acc:HGNC:9175]	-
ENSG00000103249	30.9061	16.0179	24.1693	13.4817	15.6491	CLCN7	16	1444934	1475580	-	8119	protein_coding	chloride voltage-gated channel 7 [Source:HGNC Symbol;Acc:HGNC:2025]	-
ENSG00000187720	1.02031	2.84466	1.21999	1.94252	2.71856	THSD4	15	71096952	71783383	+	15837	protein_coding	thrombospondin type 1 domain containing 4 [Source:HGNC Symbol;Acc:HGNC:25835]	-
ENSG00000166803	0.548194	3.55166	0.800048	3.57449	3.74958	PCLAF	15	64364311	64387687	-	3734	protein_coding	PCNA clamp associated factor [Source:HGNC Symbol;Acc:HGNC:28961]	-
ENSG00000204386	41.1261	21.7352	30.4083	20.5498	20.4381	NEU1	6	31857659	31862906	-	4822	protein_coding	neuraminidase 1 [Source:HGNC Symbol;Acc:HGNC:7758]	-
ENSG00000051341	0.210969	1.4321	0.133653	1.04933	1.33576	POLQ	3	121431427	121546641	-	9400	protein_coding	DNA polymerase theta [Source:HGNC Symbol;Acc:HGNC:9186]	-
ENSG00000188554	26.1498	14.2648	24.6448	13.9467	15.7776	NBR1	17	43170481	43211689	+	8405	protein_coding	NBR1, autophagy cargo receptor [Source:HGNC Symbol;Acc:HGNC:6746]	-
ENSG00000164611	4.25099	14.3395	3.8562	17.4838	13.3877	PTTG1	5	160421822	160428744	+	2013	protein_coding	pituitary tumor-transforming 1 [Source:HGNC Symbol;Acc:HGNC:9690]	-
ENSG00000176641	0.390649	1.79934	0.711227	1.02513	1.39121	RNF152	18	61808063	61894247	-	10632	protein_coding	ring finger protein 152 [Source:HGNC Symbol;Acc:HGNC:26811]	-
ENSG00000168679	12.1263	4.32748	13.3023	7.32104	6.36982	SLC16A4	1	110362848	110391082	-	3167	protein_coding	solute carrier family 16 member 4 [Source:HGNC Symbol;Acc:HGNC:10925]	-
ENSG00000108518	245.512	505.38	279.658	656.02	453.778	PFN1	17	4945652	4949061	-	1987	protein_coding	profilin 1 [Source:HGNC Symbol;Acc:HGNC:8881]	-
ENSG00000176697	5.10943	10.6627	4.07021	13.905	11.5672	BDNF	11	27654893	27722058	-	7740	protein_coding	brain derived neurotrophic factor [Source:HGNC Symbol;Acc:HGNC:1033]	-
ENSG00000163346	49.296	23.1172	73.1478	32.1251	24.1424	PBXIP1	1	154944076	154956123	-	3851	protein_coding	PBX homeobox interacting protein 1 [Source:HGNC Symbol;Acc:HGNC:21199]	-
ENSG00000108106	19.4802	46.2151	12.4513	63.9673	43.1839	UBE2S	19	55399745	55407777	-	2788	protein_coding	ubiquitin conjugating enzyme E2 S [Source:HGNC Symbol;Acc:HGNC:17895]	-
ENSG00000166340	56.058	31.1909	65.8835	26.9253	32.0336	TPP1	11	6612763	6619485	-	6544	protein_coding	tripeptidyl peptidase 1 [Source:HGNC Symbol;Acc:HGNC:2073]	-
ENSG00000134222	2.28349	8.33548	3.37803	7.47569	6.9527	PSRC1	1	109279556	109283186	-	2855	protein_coding	proline and serine rich coiled-coil 1 [Source:HGNC Symbol;Acc:HGNC:24472]	-
ENSG00000116005	54.171	28.9837	50.1409	24.6699	30.713	PCYOX1	2	70257386	70281191	+	5870	protein_coding	prenylcysteine oxidase 1 [Source:HGNC Symbol;Acc:HGNC:20588]	-
ENSG00000170144	28.9944	51.9977	23.7008	47.4478	45.7207	HNRNPA3	2	177212563	177223958	+	6033	protein_coding	heterogeneous nuclear ribonucleoprotein A3 [Source:HGNC Symbol;Acc:HGNC:24941]	-
ENSG00000033627	11.5917	5.85894	7.7392	5.03339	5.45726	ATP6V0A1	17	42458844	42522611	+	10955	protein_coding	ATPase H+ transporting V0 subunit a1 [Source:HGNC Symbol;Acc:HGNC:865]	-
ENSG00000118785	25.748	9.92696	26.1359	13.0409	10.6616	SPP1	4	87975650	87983426	+	2321	protein_coding	secreted phosphoprotein 1 [Source:HGNC Symbol;Acc:HGNC:11255]	-
ENSG00000149503	4.40067	10.9462	3.7736	6.35757	10.1102	INCENP	11	62123973	62153163	+	4473	protein_coding	inner centromere protein [Source:HGNC Symbol;Acc:HGNC:6058]	-
ENSG00000148798	4.77464	0.843541	3.78237	0.412088	0.791841	INA	10	103277163	103290351	+	3231	protein_coding	internexin neuronal intermediate filament protein alpha [Source:HGNC Symbol;Acc:HGNC:6057]	-
ENSG00000151012	21.2892	9.46473	8.2442	19.0138	22.9136	SLC7A11	4	138164097	138242349	-	9645	protein_coding	solute carrier family 7 member 11 [Source:HGNC Symbol;Acc:HGNC:11059]	-
ENSG00000136859	90.1175	44.4769	168.546	48.2216	43.6491	ANGPTL2	9	127087332	127122883	-	3889	protein_coding	angiopoietin like 2 [Source:HGNC Symbol;Acc:HGNC:490]	-
ENSG00000185989	14.2365	26.4094	17.0611	20.4593	25.3201	RASA3	13	113977783	114132611	-	4763	protein_coding	RAS p21 protein activator 3 [Source:HGNC Symbol;Acc:HGNC:20331]	-
ENSG00000105655	19.6203	7.05052	28.9382	9.51607	7.77392	ISYNA1	19	18434388	18438301	-	3284	protein_coding	inositol-3-phosphate synthase 1 [Source:HGNC Symbol;Acc:HGNC:29821]	-
ENSG00000166825	114.262	199.163	146.328	146.233	188.222	ANPEP	15	89784889	89815401	-	4871	protein_coding	alanyl aminopeptidase, membrane [Source:HGNC Symbol;Acc:HGNC:500]	-
ENSG00000101003	1.21495	5.39572	1.01188	4.5872	4.263	GINS1	20	25407727	25452628	+	4068	protein_coding	GINS complex subunit 1 [Source:HGNC Symbol;Acc:HGNC:28980]	-
ENSG00000082512	1.66234	4.32558	1.39166	3.9559	4.58905	TRAF5	1	211326615	211374946	+	9022	protein_coding	TNF receptor associated factor 5 [Source:HGNC Symbol;Acc:HGNC:12035]	-
ENSG00000135679	16.6922	8.05494	21.8511	7.29636	6.98755	MDM2	12	68808176	68850686	+	13284	protein_coding	MDM2 proto-oncogene [Source:HGNC Symbol;Acc:HGNC:6973]	-
ENSG00000116685	80.6624	40.0633	77.3208	46.428	44.7541	KIAA2013	1	11919591	11926428	-	3281	protein_coding	KIAA2013 [Source:HGNC Symbol;Acc:HGNC:28513]	-
ENSG00000133805	6.605	2.33329	11.5723	2.6466	2.71889	AMPD3	11	10308313	10507579	+	6793	protein_coding	adenosine monophosphate deaminase 3 [Source:HGNC Symbol;Acc:HGNC:470]	-
ENSG00000214357	0.28265	2.00489	0.583838	1.11626	1.78156	NEURL1B	5	172641266	172691540	+	6424	protein_coding	neuralized E3 ubiquitin protein ligase 1B [Source:HGNC Symbol;Acc:HGNC:35422]	-
ENSG00000011465	17.4577	35.3715	43.139	45.266	37.8825	DCN	12	91140484	91183123	-	12847	protein_coding	decorin [Source:HGNC Symbol;Acc:HGNC:2705]	-
ENSG00000070214	12.8433	5.84495	8.6313	5.80173	6.55737	SLC44A1	9	105244622	105439171	+	12172	protein_coding	solute carrier family 44 member 1 [Source:HGNC Symbol;Acc:HGNC:18798]	-
ENSG00000135929	17.6471	6.79558	21.0493	10.7496	8.18111	CYP27A1	2	218781749	218815293	+	2983	protein_coding	cytochrome P450 family 27 subfamily A member 1 [Source:HGNC Symbol;Acc:HGNC:2605]	-
ENSG00000176890	3.1679	12.5092	4.51828	8.80395	10.489	TYMS	18	657604	673578	+	2470	protein_coding	thymidylate synthetase [Source:HGNC Symbol;Acc:HGNC:12441]	-
ENSG00000065150	22.4525	37.1155	21.4891	31.8358	38.2444	IPO5	13	97953658	98024297	+	9671	protein_coding	importin 5 [Source:HGNC Symbol;Acc:HGNC:6402]	-
ENSG00000072210	7.27455	2.84232	5.71626	2.83391	3.06589	ALDH3A2	17	19648136	19677598	+	6457	protein_coding	aldehyde dehydrogenase 3 family member A2 [Source:HGNC Symbol;Acc:HGNC:403]	-
ENSG00000160072	4.47577	10.0573	3.66594	12.7653	9.74527	ATAD3B	1	1471769	1497848	+	7682	protein_coding	ATPase family, AAA domain containing 3B [Source:HGNC Symbol;Acc:HGNC:24007]	-
ENSG00000171488	0.642905	2.23508	1.16825	1.5993	2.5749	LRRC8C	1	89633072	89769903	+	11724	protein_coding	leucine rich repeat containing 8 VRAC subunit C [Source:HGNC Symbol;Acc:HGNC:25075]	-
ENSG00000173848	4.62199	12.1244	6.27124	11.6455	13.1268	NET1	10	5412551	5458463	+	4175	protein_coding	neuroepithelial cell transforming 1 [Source:HGNC Symbol;Acc:HGNC:14592]	-
ENSG00000152253	0.289342	4.85162	0.339642	3.71175	4.0395	SPC25	2	168834132	168913371	-	1841	protein_coding	SPC25, NDC80 kinetochore complex component [Source:HGNC Symbol;Acc:HGNC:24031]	-
ENSG00000154127	4.09854	9.0591	5.84695	7.35185	9.20342	UBASH3B	11	122655675	122814473	+	9011	protein_coding	ubiquitin associated and SH3 domain containing B [Source:HGNC Symbol;Acc:HGNC:29884]	-
ENSG00000162302	15.513	32.3787	11.9716	30.9578	30.5796	RPS6KA4	11	64359148	64372215	+	3807	protein_coding	ribosomal protein S6 kinase A4 [Source:HGNC Symbol;Acc:HGNC:10433]	-
ENSG00000116679	4.08735	9.24495	5.41442	8.33081	9.2179	IVNS1ABP	1	185296388	185317329	-	7929	protein_coding	influenza virus NS1A binding protein [Source:HGNC Symbol;Acc:HGNC:16951]	-
ENSG00000085117	16.5022	7.24321	23.0247	9.5984	7.85104	CD82	11	44564427	44620363	+	4054	protein_coding	CD82 molecule [Source:HGNC Symbol;Acc:HGNC:6210]	-
ENSG00000171862	16.4298	8.39086	24.5037	10.8685	10.6697	PTEN	10	87863113	87971930	+	11581	protein_coding	phosphatase and tensin homolog [Source:HGNC Symbol;Acc:HGNC:9588]	-
ENSG00000123136	11.2638	24.7158	10.0751	23.3471	20.3239	DDX39A	19	14408819	14419383	-	3840	protein_coding	DExD-box helicase 39A [Source:HGNC Symbol;Acc:HGNC:17821]	-
ENSG00000119280	24.0361	43.4022	21.5317	47.3447	50.3535	C1orf198	1	230837119	230869589	-	5161	protein_coding	chromosome 1 open reading frame 198 [Source:HGNC Symbol;Acc:HGNC:25900]	-
ENSG00000142687	10.3078	4.72676	9.88383	4.72671	4.90255	KIAA0319L	1	35433490	35557950	-	9629	protein_coding	KIAA0319 like [Source:HGNC Symbol;Acc:HGNC:30071]	-
ENSG00000196743	32.7151	17.5592	31.951	17.3338	18.0404	GM2A	5	151212150	151270440	+	4479	protein_coding	GM2 ganglioside activator [Source:HGNC Symbol;Acc:HGNC:4367]	-
ENSG00000138735	8.76195	4.08246	7.25151	5.46791	6.10819	PDE5A	4	119494395	119628991	-	9775	protein_coding	phosphodiesterase 5A [Source:HGNC Symbol;Acc:HGNC:8784]	-
ENSG00000102007	61.7846	123.775	73.9401	109.116	114.987	PLP2	X	49171926	49175239	+	1279	protein_coding	proteolipid protein 2 [Source:HGNC Symbol;Acc:HGNC:9087]	-
ENSG00000123219	0.489992	3.0084	0.456568	2.50518	2.71882	CENPK	5	65517766	65563171	-	4312	protein_coding	centromere protein K [Source:HGNC Symbol;Acc:HGNC:29479]	-
ENSG00000159259	0.943849	3.9598	0.896663	3.46785	3.68132	CHAF1B	21	36385378	36419015	+	5118	protein_coding	chromatin assembly factor 1 subunit B [Source:HGNC Symbol;Acc:HGNC:1911]	-
ENSG00000025770	7.3977	17.4663	8.40325	20.2326	16.5688	NCAPH2	22	50508216	50523472	+	3159	protein_coding	non-SMC condensin II complex subunit H2 [Source:HGNC Symbol;Acc:HGNC:25071]	-
ENSG00000182326	15.8324	29.1668	23.2414	37.1721	30.6602	C1S	12	6988259	7071032	+	6462	protein_coding	complement C1s [Source:HGNC Symbol;Acc:HGNC:1247]	-
ENSG00000146278	27.8578	12.5198	52.4779	15.6525	12.8771	PNRC1	6	89080751	89085160	+	2992	protein_coding	proline rich nuclear receptor coactivator 1 [Source:HGNC Symbol;Acc:HGNC:17278]	-
ENSG00000128245	44.2921	84.0306	35.8759	88.8248	77.7016	YWHAH	22	31944461	31957603	+	2453	protein_coding	tyrosine 3-monooxygenase/tryptophan 5-monooxygenase activation protein eta [Source:HGNC Symbol;Acc:HGNC:12853]	-
ENSG00000115919	0.734807	0.0117082	1.08422	0.0656099	0.0506747	KYNU	2	142877498	143055832	+	17600	protein_coding	kynureninase [Source:HGNC Symbol;Acc:HGNC:6469]	-
ENSG00000111602	4.52538	10.2302	3.46926	6.6719	8.74645	TIMELESS	12	56416373	56449403	-	5818	protein_coding	timeless circadian regulator [Source:HGNC Symbol;Acc:HGNC:11813]	-
ENSG00000187098	4.89788	1.67079	3.46729	1.99491	2.10989	MITF	3	69739435	69968337	+	7181	protein_coding	melanogenesis associated transcription factor [Source:HGNC Symbol;Acc:HGNC:7105]	bHLH
ENSG00000049541	5.43173	15.4143	5.54007	14.6552	13.1871	RFC2	7	74231499	74254458	-	2211	protein_coding	replication factor C subunit 2 [Source:HGNC Symbol;Acc:HGNC:9970]	-
ENSG00000166548	8.93552	3.9921	6.89712	3.84791	4.50525	TK2	16	66508003	66552544	-	7169	protein_coding	thymidine kinase 2, mitochondrial [Source:HGNC Symbol;Acc:HGNC:11831]	-
ENSG00000163931	85.7668	50.4505	89.1832	63.9436	62.6045	TKT	3	53224707	53256052	-	9507	protein_coding	transketolase [Source:HGNC Symbol;Acc:HGNC:11834]	-
ENSG00000096746	8.85006	19.0654	9.7636	20.2245	18.723	HNRNPH3	10	68331174	68343191	+	5373	protein_coding	heterogeneous nuclear ribonucleoprotein H3 [Source:HGNC Symbol;Acc:HGNC:5043]	-
ENSG00000214826	0.475488	3.68608	0.525068	1.84583	2.90978	DDX12P	12	9418673	9448229	-	2947	unprocessed_pseudogene	DEAD/H-box helicase 12, pseudogene [Source:HGNC Symbol;Acc:HGNC:2737]	-
ENSG00000118655	1.41493	5.36331	1.44876	3.91995	4.76608	DCLRE1B	1	113905141	113914086	+	3940	protein_coding	DNA cross-link repair 1B [Source:HGNC Symbol;Acc:HGNC:17641]	-
ENSG00000077514	1.57507	4.85464	1.61052	3.97031	4.44153	POLD3	11	74493851	74669117	+	5508	protein_coding	DNA polymerase delta 3, accessory subunit [Source:HGNC Symbol;Acc:HGNC:20932]	-
ENSG00000206053	8.49943	17.9687	7.27895	16.0128	16.1675	JPT2	16	1678256	1702280	+	4768	protein_coding	Jupiter microtubule associated homolog 2 [Source:HGNC Symbol;Acc:HGNC:14137]	-
ENSG00000151849	0.616378	2.92849	0.621499	2.01325	2.54701	CENPJ	13	24882284	24922889	-	5812	protein_coding	centromere protein J [Source:HGNC Symbol;Acc:HGNC:17272]	-
ENSG00000124201	20.2196	10.2978	16.0553	8.31103	10.2805	ZNFX1	20	49237946	49278426	-	9340	protein_coding	zinc finger NFX1-type containing 1 [Source:HGNC Symbol;Acc:HGNC:29271]	-
ENSG00000204256	40.7026	23.0726	30.4317	21.025	24.9869	BRD2	6	32968660	32981505	+	7337	protein_coding	bromodomain containing 2 [Source:HGNC Symbol;Acc:HGNC:1103]	-
ENSG00000091436	5.01705	10.2969	5.35579	7.91339	11.6156	MAP3K20	2	173075435	173268010	+	13799	protein_coding	mitogen-activated protein kinase kinase kinase 20 [Source:HGNC Symbol;Acc:HGNC:17797]	-
ENSG00000158710	107.676	192.021	124.563	189.897	170.124	TAGLN2	1	159918107	159925732	-	2487	protein_coding	transgelin 2 [Source:HGNC Symbol;Acc:HGNC:11554]	-
ENSG00000113460	4.26206	10.2644	2.98378	13.1787	12.1675	BRIX1	5	34915376	34925996	+	5011	protein_coding	BRX1, biogenesis of ribosomes [Source:HGNC Symbol;Acc:HGNC:24170]	-
ENSG00000168542	89.1346	173.081	173.318	211.099	198.484	COL3A1	2	188974320	189012746	+	6811	protein_coding	collagen type III alpha 1 chain [Source:HGNC Symbol;Acc:HGNC:2201]	-
ENSG00000144554	0.50095	2.09626	0.491256	1.21873	1.86565	FANCD2	3	10026414	10101930	+	8378	protein_coding	FA complementation group D2 [Source:HGNC Symbol;Acc:HGNC:3585]	-
ENSG00000163808	0.346646	2.32863	0.3331	1.37339	2.19074	KIF15	3	44761717	44873376	+	5285	protein_coding	kinesin family member 15 [Source:HGNC Symbol;Acc:HGNC:17273]	-
ENSG00000142156	455.683	795.916	732.978	771.571	801.351	COL6A1	21	45981737	46005050	+	5343	protein_coding	collagen type VI alpha 1 chain [Source:HGNC Symbol;Acc:HGNC:2211]	-
ENSG00000164683	6.93327	1.72551	13.7083	4.30697	2.77356	HEY1	8	79764010	79767863	-	3232	protein_coding	hes related family bHLH transcription factor with YRPW motif 1 [Source:HGNC Symbol;Acc:HGNC:4880]	bHLH
ENSG00000102781	3.64592	8.14778	3.90441	6.35428	8.64709	KATNAL1	13	30202630	30307484	-	8105	protein_coding	katanin catalytic subunit A1 like 1 [Source:HGNC Symbol;Acc:HGNC:28361]	-
ENSG00000099875	25.5224	12.8823	21.5511	10.9754	12.1442	MKNK2	19	2037465	2051244	-	5221	protein_coding	MAP kinase interacting serine/threonine kinase 2 [Source:HGNC Symbol;Acc:HGNC:7111]	-
ENSG00000141682	3.77529	12.1044	3.29805	10.0296	12.1933	PMAIP1	18	59899948	59904306	+	2235	protein_coding	phorbol-12-myristate-13-acetate-induced protein 1 [Source:HGNC Symbol;Acc:HGNC:9108]	-
ENSG00000197930	23.4844	12.5495	37.042	11.8031	12.7231	ERO1A	14	52639916	52695900	-	7548	protein_coding	endoplasmic reticulum oxidoreductase 1 alpha [Source:HGNC Symbol;Acc:HGNC:13280]	-
ENSG00000181649	94.6523	184.67	52.7161	222.539	181.331	PHLDA2	11	2928273	2929455	-	955	protein_coding	pleckstrin homology like domain family A member 2 [Source:HGNC Symbol;Acc:HGNC:12385]	-
ENSG00000138642	2.57277	0.431903	1.91493	0.358538	0.329252	HERC6	4	88378739	88443111	+	5793	protein_coding	HECT and RLD domain containing E3 ubiquitin protein ligase family member 6 [Source:HGNC Symbol;Acc:HGNC:26072]	-
ENSG00000068079	17.639	5.21933	12.456	7.23005	5.50067	IFI35	17	43006725	43014456	+	1973	protein_coding	interferon induced protein 35 [Source:HGNC Symbol;Acc:HGNC:5399]	-
ENSG00000114796	6.51855	2.70007	10.6093	2.75654	2.61217	KLHL24	3	183635568	183684477	+	8650	protein_coding	kelch like family member 24 [Source:HGNC Symbol;Acc:HGNC:25947]	-
ENSG00000167325	14.9483	29.857	16.0604	25.8949	29.6014	RRM1	11	4094707	4138876	+	4177	protein_coding	ribonucleotide reductase catalytic subunit M1 [Source:HGNC Symbol;Acc:HGNC:10451]	-
ENSG00000138092	1.52215	4.77427	1.53855	3.58038	3.98168	CENPO	2	24793136	24822376	+	5518	protein_coding	centromere protein O [Source:HGNC Symbol;Acc:HGNC:28152]	-
ENSG00000120539	2.02084	7.23066	2.81258	5.20005	6.96612	MASTL	10	27154824	27186924	+	3631	protein_coding	microtubule associated serine/threonine kinase like [Source:HGNC Symbol;Acc:HGNC:19042]	-
ENSG00000162645	2.37218	0.418522	3.99877	0.997927	0.700704	GBP2	1	89106132	89150456	-	6276	protein_coding	guanylate binding protein 2 [Source:HGNC Symbol;Acc:HGNC:4183]	-
ENSG00000125450	4.19171	9.51981	4.24508	9.06169	8.50862	NUP85	17	75205659	75235758	+	5193	protein_coding	nucleoporin 85 [Source:HGNC Symbol;Acc:HGNC:8734]	-
ENSG00000162736	64.7302	37.1556	68.4841	30.4398	40.095	NCSTN	1	160343272	160358952	+	4175	protein_coding	nicastrin [Source:HGNC Symbol;Acc:HGNC:17091]	-
ENSG00000168411	3.61901	8.66238	3.04022	6.13777	8.28247	RFWD3	16	74621394	74666881	-	6465	protein_coding	ring finger and WD repeat domain 3 [Source:HGNC Symbol;Acc:HGNC:25539]	-
ENSG00000105974	115.933	207.847	210.34	189.72	200.772	CAV1	7	116524785	116561184	+	4082	protein_coding	caveolin 1 [Source:HGNC Symbol;Acc:HGNC:1527]	-
ENSG00000120254	10.6312	21.1188	12.9444	23.2973	21.8667	MTHFD1L	6	150865549	151101887	+	5021	protein_coding	methylenetetrahydrofolate dehydrogenase (NADP+ dependent) 1 like [Source:HGNC Symbol;Acc:HGNC:21055]	-
ENSG00000165655	13.7	5.07801	18.4786	6.82134	6.80689	ZNF503	10	75397830	75401906	-	3347	protein_coding	zinc finger protein 503 [Source:HGNC Symbol;Acc:HGNC:23589]	-
ENSG00000161638	79.7822	138.814	112.467	122.345	135.986	ITGA5	12	54395261	54419460	-	7577	protein_coding	integrin subunit alpha 5 [Source:HGNC Symbol;Acc:HGNC:6141]	-
ENSG00000132646	54.8873	105.183	53.4507	103.909	89.142	PCNA	20	5114953	5126626	-	1471	protein_coding	proliferating cell nuclear antigen [Source:HGNC Symbol;Acc:HGNC:8729]	-
ENSG00000072195	4.21157	8.40391	6.90652	8.70662	8.16361	SPEG	2	219434846	219498287	+	17910	protein_coding	SPEG complex locus [Source:HGNC Symbol;Acc:HGNC:16901]	-
ENSG00000134775	0.386647	2.13045	0.38154	1.08001	1.86397	FHOD3	18	36297714	36780055	+	7965	protein_coding	formin homology 2 domain containing 3 [Source:HGNC Symbol;Acc:HGNC:26178]	-
ENSG00000101868	0.978565	3.48105	1.11544	2.15054	3.33149	POLA1	X	24693919	24996986	+	6336	protein_coding	DNA polymerase alpha 1, catalytic subunit [Source:HGNC Symbol;Acc:HGNC:9173]	-
ENSG00000172379	3.13441	7.40899	4.5736	6.25916	7.81606	ARNT2	15	80404350	80597937	+	7741	protein_coding	aryl hydrocarbon receptor nuclear translocator 2 [Source:HGNC Symbol;Acc:HGNC:16876]	bHLH
ENSG00000168300	9.05844	4.19232	12.6362	4.77663	4.4707	PCMTD1	8	51817575	51899186	-	7323	protein_coding	protein-L-isoaspartate (D-aspartate) O-methyltransferase domain containing 1 [Source:HGNC Symbol;Acc:HGNC:30483]	-
ENSG00000198743	17.5779	38.1943	42.1689	37.5129	42.1055	SLC5A3	21	34073570	34106262	+	11576	protein_coding	solute carrier family 5 member 3 [Source:HGNC Symbol;Acc:HGNC:11038]	-
ENSG00000120708	373.498	643.63	643.372	765.796	723.635	TGFBI	5	136028895	136063818	+	7810	protein_coding	transforming growth factor beta induced [Source:HGNC Symbol;Acc:HGNC:11771]	-
ENSG00000235531	3.8953	1.0583	2.94678	1.61366	1.70803	MSC-AS1	8	71828167	72118393	+	6284	antisense	MSC antisense RNA 1 [Source:HGNC Symbol;Acc:HGNC:48724]	-
ENSG00000038427	0.95803	2.59963	2.07345	1.87711	2.57193	VCAN	5	83471465	83582303	+	14831	protein_coding	versican [Source:HGNC Symbol;Acc:HGNC:2464]	-
ENSG00000070882	4.44877	9.54718	5.66988	7.44867	9.0838	OSBPL3	7	24796539	24981634	-	8100	protein_coding	oxysterol binding protein like 3 [Source:HGNC Symbol;Acc:HGNC:16370]	-
ENSG00000137959	1.05168	0.0444253	0.700095	0.0639075	0.0719538	IFI44L	1	78619922	78646145	+	10240	protein_coding	interferon induced protein 44 like [Source:HGNC Symbol;Acc:HGNC:17817]	-
ENSG00000196586	12.7106	6.44853	11.4416	6.01859	6.65834	MYO6	6	75749192	75919537	+	8785	protein_coding	myosin VI [Source:HGNC Symbol;Acc:HGNC:7605]	-
ENSG00000163431	6.09103	14.9068	10.9502	21.1243	17.8946	LMOD1	1	201896452	201946588	-	3971	protein_coding	leiomodin 1 [Source:HGNC Symbol;Acc:HGNC:6647]	-
ENSG00000148841	4.37892	9.60403	5.83447	7.00316	9.25053	ITPRIP	10	104309698	104338448	-	7279	protein_coding	inositol 1,4,5-trisphosphate receptor interacting protein [Source:HGNC Symbol;Acc:HGNC:29370]	-
ENSG00000118193	0.401046	2.40628	0.336777	1.37563	2.47081	KIF14	1	200551497	200620734	-	7277	protein_coding	kinesin family member 14 [Source:HGNC Symbol;Acc:HGNC:19181]	-
ENSG00000137331	137.259	65.7656	254.116	120.737	89.9127	IER3	6	30743199	30744554	-	1356	protein_coding	immediate early response 3 [Source:HGNC Symbol;Acc:HGNC:5392]	-
ENSG00000167291	14.8781	7.30174	12.6105	7.10565	8.13124	TBC1D16	17	79932343	80035848	-	11555	protein_coding	TBC1 domain family member 16 [Source:HGNC Symbol;Acc:HGNC:28356]	-
ENSG00000132386	9.77669	20.4864	16.9219	24.7158	21.3171	SERPINF1	17	1761959	1777574	+	3069	protein_coding	serpin family F member 1 [Source:HGNC Symbol;Acc:HGNC:8824]	-
ENSG00000111799	53.9088	102.905	72.1385	104.351	123.924	COL12A1	6	75084326	75206051	-	12481	protein_coding	collagen type XII alpha 1 chain [Source:HGNC Symbol;Acc:HGNC:2188]	-
ENSG00000206190	2.35329	6.0412	2.14756	5.77377	7.03282	ATP10A	15	25677273	25865172	-	8409	protein_coding	ATPase phospholipid transporting 10A (putative) [Source:HGNC Symbol;Acc:HGNC:13542]	-
ENSG00000198554	1.43206	4.44669	1.34804	3.0322	4.19514	WDHD1	14	54938950	55027105	-	6385	protein_coding	WD repeat and HMG-box DNA binding protein 1 [Source:HGNC Symbol;Acc:HGNC:23170]	HMG
ENSG00000116661	5.5602	1.20272	7.98629	2.5297	1.22633	FBXO2	1	11637018	11655785	-	3416	protein_coding	F-box protein 2 [Source:HGNC Symbol;Acc:HGNC:13581]	-
ENSG00000070413	46.8625	27.0364	33.7861	24.4951	26.9616	DGCR2	22	19036282	19122454	-	5605	protein_coding	DiGeorge syndrome critical region gene 2 [Source:HGNC Symbol;Acc:HGNC:2845]	-
ENSG00000152795	29.8099	51.2076	35.7863	49.9337	42.1025	HNRNPDL	4	82422564	82430408	-	5476	protein_coding	heterogeneous nuclear ribonucleoprotein D like [Source:HGNC Symbol;Acc:HGNC:5037]	-
ENSG00000138668	15.1225	28.5958	15.0908	27.935	23.844	HNRNPD	4	82352498	82374503	-	6981	protein_coding	heterogeneous nuclear ribonucleoprotein D [Source:HGNC Symbol;Acc:HGNC:5036]	-
ENSG00000115844	11.8599	4.16892	8.9881	5.73931	4.79859	DLX2	2	172099439	172102900	-	2970	protein_coding	distal-less homeobox 2 [Source:HGNC Symbol;Acc:HGNC:2915]	Homeobox
ENSG00000161544	38.0609	16.4427	69.9745	19.6879	17.7746	CYGB	17	76527356	76551175	-	2949	protein_coding	cytoglobin [Source:HGNC Symbol;Acc:HGNC:16505]	-
ENSG00000130517	14.3343	7.48738	20.4236	7.35352	6.81729	PGPEP1	19	18340587	18369950	+	7520	protein_coding	pyroglutamyl-peptidase I [Source:HGNC Symbol;Acc:HGNC:13568]	-
ENSG00000173599	5.01813	1.76585	5.86873	1.9587	1.75286	PC	11	66848233	66958376	-	5927	protein_coding	pyruvate carboxylase [Source:HGNC Symbol;Acc:HGNC:8636]	-
ENSG00000167972	1.18305	0.078418	1.14693	0.16599	0.147746	ABCA3	16	2275881	2340746	-	7804	protein_coding	ATP binding cassette subfamily A member 3 [Source:HGNC Symbol;Acc:HGNC:33]	-
ENSG00000137193	7.30209	2.02649	10.3593	2.51919	2.15277	PIM1	6	37170203	37175426	+	2977	protein_coding	Pim-1 proto-oncogene, serine/threonine kinase [Source:HGNC Symbol;Acc:HGNC:8986]	-
ENSG00000128591	86.9515	170.07	107.712	162.715	187.004	FLNC	7	128830377	128859274	+	9280	protein_coding	filamin C [Source:HGNC Symbol;Acc:HGNC:3756]	-
ENSG00000085840	0.632844	3.73603	0.519088	2.28381	3.24847	ORC1	1	52372829	52404459	-	3157	protein_coding	origin recognition complex subunit 1 [Source:HGNC Symbol;Acc:HGNC:8487]	-
ENSG00000242125	4.45607	11.0113	2.35542	12.3087	10.6948	SNHG3	1	28505980	28510892	+	4088	processed_transcript	small nucleolar RNA host gene 3 [Source:HGNC Symbol;Acc:HGNC:10118]	-
ENSG00000118473	2.98828	6.35093	3.67048	4.65203	6.07886	SGIP1	1	66533383	66748299	+	10477	protein_coding	SH3 domain GRB2 like endophilin interacting protein 1 [Source:HGNC Symbol;Acc:HGNC:25412]	-
ENSG00000187498	45.2894	75.7341	47.3052	72.884	85.5384	COL4A1	13	110148963	110307233	-	14738	protein_coding	collagen type IV alpha 1 chain [Source:HGNC Symbol;Acc:HGNC:2202]	-
ENSG00000186417	1.61565	0.181259	1.73822	0.481812	0.348459	GLDN	15	51341629	51408013	+	7144	protein_coding	gliomedin [Source:HGNC Symbol;Acc:HGNC:29514]	-
ENSG00000147883	6.66292	2.25469	7.08439	3.08351	2.95799	CDKN2B	9	22002903	22009363	-	4058	protein_coding	cyclin dependent kinase inhibitor 2B [Source:HGNC Symbol;Acc:HGNC:1788]	-
ENSG00000222041	0.981634	2.64422	0.865062	3.50982	2.08924	CYTOR	2	87454781	87636740	+	17693	lincRNA	cytoskeleton regulator RNA [Source:HGNC Symbol;Acc:HGNC:28717]	-
ENSG00000136044	15.9729	28.4005	14.9125	24.8655	27.7174	APPL2	12	105173296	105236238	-	5124	protein_coding	adaptor protein, phosphotyrosine interacting with PH domain and leucine zipper 2 [Source:HGNC Symbol;Acc:HGNC:18242]	-
ENSG00000082641	77.1618	44.944	80.4472	37.3158	44.5945	NFE2L1	17	48048329	48061487	+	5825	protein_coding	nuclear factor, erythroid 2 like 1 [Source:HGNC Symbol;Acc:HGNC:7781]	TF_bZIP
ENSG00000033100	95.4665	55.9746	74.6541	63.9	64.8966	CHPF2	7	151232489	151238827	+	4205	protein_coding	chondroitin polymerizing factor 2 [Source:HGNC Symbol;Acc:HGNC:29270]	-
ENSG00000125266	5.21037	11.4175	4.39202	13.204	14.8304	EFNB2	13	106489731	106535662	-	5019	protein_coding	ephrin B2 [Source:HGNC Symbol;Acc:HGNC:3227]	-
ENSG00000143815	4.18317	9.71524	2.89314	8.74123	11.2738	LBR	1	225401502	225428925	-	5257	protein_coding	lamin B receptor [Source:HGNC Symbol;Acc:HGNC:6518]	-
ENSG00000129514	2.40057	0.0993393	2.79804	0.124138	0.10385	FOXA1	14	37589984	37596059	-	3982	protein_coding	forkhead box A1 [Source:HGNC Symbol;Acc:HGNC:5021]	Fork
ENSG00000120889	32.3764	18.5267	37.8629	16.3418	18.067	TNFRSF10B	8	23020133	23069179	-	5158	protein_coding	TNF receptor superfamily member 10b [Source:HGNC Symbol;Acc:HGNC:11905]	-
ENSG00000131351	0.330642	2.17463	0.42029	2.00385	1.9043	HAUS8	19	17049729	17075625	-	5533	protein_coding	HAUS augmin like complex subunit 8 [Source:HGNC Symbol;Acc:HGNC:30532]	-
ENSG00000183160	112.581	61.0532	144.384	66.6362	61.0268	TMEM119	12	108589846	108598320	-	3189	protein_coding	transmembrane protein 119 [Source:HGNC Symbol;Acc:HGNC:27884]	-
ENSG00000162493	5.48644	1.43933	6.42797	1.98048	1.57079	PDPN	1	13583465	13617957	+	3707	protein_coding	podoplanin [Source:HGNC Symbol;Acc:HGNC:29602]	-
ENSG00000067798	2.03285	5.1386	1.24439	4.29149	6.23693	NAV3	12	77324641	78213008	+	13265	protein_coding	neuron navigator 3 [Source:HGNC Symbol;Acc:HGNC:15998]	-
ENSG00000151348	57.8301	34.9297	53.317	33.5148	35.8386	EXT2	11	44095549	44245429	+	5286	protein_coding	exostosin glycosyltransferase 2 [Source:HGNC Symbol;Acc:HGNC:3513]	-
ENSG00000225648	13.3739	31.432	10.7835	31.1597	28.1582	SBDSP1	7	72829425	72836701	+	1239	transcribed_unprocessed_pseudogene	SBDS, ribosome maturation factor pseudogene 1 [Source:HGNC Symbol;Acc:HGNC:21646]	-
ENSG00000053372	11.4833	23.6767	10.2853	29.1071	21.9624	MRTO4	1	19251539	19260128	+	2822	protein_coding	MRT4 homolog, ribosome maturation factor [Source:HGNC Symbol;Acc:HGNC:18477]	-
ENSG00000150593	13.0663	5.87927	15.596	6.40886	5.63507	PDCD4	10	110871795	110900006	+	4547	protein_coding	programmed cell death 4 [Source:HGNC Symbol;Acc:HGNC:8763]	-
ENSG00000154767	12.7251	5.76121	17.5117	5.13655	5.80872	XPC	3	14145147	14178783	-	4798	protein_coding	XPC complex subunit, DNA damage recognition and repair factor [Source:HGNC Symbol;Acc:HGNC:12816]	-
ENSG00000168306	6.02021	1.81215	5.52039	2.74701	2.1306	ACOX2	3	58505136	58537319	-	3859	protein_coding	acyl-CoA oxidase 2 [Source:HGNC Symbol;Acc:HGNC:120]	-
ENSG00000196562	9.91848	4.51895	13.446	4.03462	4.7431	SULF2	20	47656348	47786616	-	6657	protein_coding	sulfatase 2 [Source:HGNC Symbol;Acc:HGNC:20392]	-
ENSG00000100401	36.5009	67.4972	26.3882	76.8132	62.5712	RANGAP1	22	41245611	41286251	-	5348	protein_coding	Ran GTPase activating protein 1 [Source:HGNC Symbol;Acc:HGNC:9854]	-
ENSG00000142197	3.36472	7.81915	2.4729	5.9656	8.28403	DOP1B	21	36156782	36294274	+	9030	protein_coding	DOP1 leucine zipper like protein B [Source:HGNC Symbol;Acc:HGNC:1291]	-
ENSG00000129636	18.0635	9.90005	17.0761	10.909	11.1367	ITFG1	16	47154387	47464149	-	7770	protein_coding	integrin alpha FG-GAP repeat containing 1 [Source:HGNC Symbol;Acc:HGNC:30697]	-
ENSG00000213694	18.7693	10.9328	17.8569	15.5468	17.0936	S1PR3	9	88990863	89005010	+	13578	protein_coding	sphingosine-1-phosphate receptor 3 [Source:HGNC Symbol;Acc:HGNC:3167]	-
ENSG00000140945	6.88014	3.44642	7.88015	3.06531	3.87299	CDH13	16	82626803	83800640	+	11187	protein_coding	cadherin 13 [Source:HGNC Symbol;Acc:HGNC:1753]	-
ENSG00000100345	242.806	415.956	335.561	400.1	456.701	MYH9	22	36281277	36388067	-	9012	protein_coding	myosin heavy chain 9 [Source:HGNC Symbol;Acc:HGNC:7579]	-
ENSG00000171345	10.1588	26.0675	32.4858	26.9788	23.0741	KRT19	17	41523617	41528308	-	2336	protein_coding	keratin 19 [Source:HGNC Symbol;Acc:HGNC:6436]	-
ENSG00000106333	71.7598	143.378	106.113	196.188	144.742	PCOLCE	7	100602177	100608175	+	3532	protein_coding	procollagen C-endopeptidase enhancer [Source:HGNC Symbol;Acc:HGNC:8738]	-
ENSG00000244694	2.73814	0.573011	4.55896	0.695589	0.684038	PTCHD4	6	47878028	48068689	-	5177	protein_coding	patched domain containing 4 [Source:HGNC Symbol;Acc:HGNC:21345]	-
ENSG00000109501	36.4976	19.2118	36.9303	22.3161	22.3932	WFS1	4	6269849	6303265	+	4513	protein_coding	wolframin ER transmembrane glycoprotein [Source:HGNC Symbol;Acc:HGNC:12762]	-
ENSG00000158373	24.2484	6.86029	25.7977	7.24989	6.90893	HIST1H2BD	6	26158146	26171349	+	871	protein_coding	histone cluster 1 H2B family member d [Source:HGNC Symbol;Acc:HGNC:4747]	-
ENSG00000091622	0.9519	2.59393	1.59017	2.97806	3.40091	PITPNM3	17	6451264	6556494	-	10609	protein_coding	PITPNM family member 3 [Source:HGNC Symbol;Acc:HGNC:21043]	-
ENSG00000117650	0.532173	3.41747	0.195169	2.23922	3.49258	NEK2	1	211658657	211675630	-	3095	protein_coding	NIMA related kinase 2 [Source:HGNC Symbol;Acc:HGNC:7745]	-
ENSG00000109107	12.6676	3.41726	26.6756	8.83703	5.18655	ALDOC	17	28573115	28577264	-	2928	protein_coding	aldolase, fructose-bisphosphate C [Source:HGNC Symbol;Acc:HGNC:418]	-
ENSG00000133687	2.24706	4.58035	1.91307	2.65575	3.89958	TMTC1	12	29500840	29784759	-	14636	protein_coding	transmembrane and tetratricopeptide repeat containing 1 [Source:HGNC Symbol;Acc:HGNC:24099]	-
ENSG00000162063	1.00257	3.28153	0.810158	2.45743	3.18317	CCNF	16	2429394	2458854	+	6309	protein_coding	cyclin F [Source:HGNC Symbol;Acc:HGNC:1591]	-
ENSG00000147536	0.444469	2.40486	0.466306	1.57125	2.39269	GINS4	8	41529206	41545046	+	5475	protein_coding	GINS complex subunit 4 [Source:HGNC Symbol;Acc:HGNC:28226]	-
ENSG00000128805	3.67511	8.62743	4.96798	8.96952	8.14761	ARHGAP22	10	48446034	48656265	-	6783	protein_coding	Rho GTPase activating protein 22 [Source:HGNC Symbol;Acc:HGNC:30320]	-
ENSG00000189241	46.797	26.7121	34.8977	30.5265	26.9362	TSPYL1	6	116276578	116279903	-	3326	protein_coding	TSPY like 1 [Source:HGNC Symbol;Acc:HGNC:12382]	-
ENSG00000087116	21.0634	35.8581	28.185	44.9057	45.2594	ADAMTS2	5	179110851	179345430	-	8726	protein_coding	ADAM metallopeptidase with thrombospondin type 1 motif 2 [Source:HGNC Symbol;Acc:HGNC:218]	-
ENSG00000105516	4.53504	1.43831	9.01116	2.10829	1.27939	DBP	19	48630030	48637438	-	6544	protein_coding	D-box binding PAR bZIP transcription factor [Source:HGNC Symbol;Acc:HGNC:2697]	TF_bZIP
ENSG00000228716	2.24901	6.26565	2.5042	4.42335	6.02114	DHFR	5	80626228	80654983	-	4409	protein_coding	dihydrofolate reductase [Source:HGNC Symbol;Acc:HGNC:2861]	-
ENSG00000140859	9.20023	16.5575	7.38322	19.1253	16.4503	KIFC3	16	57758217	57863053	-	9600	protein_coding	kinesin family member C3 [Source:HGNC Symbol;Acc:HGNC:6326]	-
ENSG00000197467	3.08627	7.06377	5.01625	6.90437	6.94281	COL13A1	10	69801867	69964275	+	5888	protein_coding	collagen type XIII alpha 1 chain [Source:HGNC Symbol;Acc:HGNC:2190]	-
ENSG00000185432	7.03869	2.54234	9.1534	2.28696	2.4454	METTL7A	12	50923472	50932517	+	4083	protein_coding	methyltransferase like 7A [Source:HGNC Symbol;Acc:HGNC:24550]	-
ENSG00000138658	0.247335	1.32186	0.444933	0.799692	1.30971	ZGRF1	4	112539333	112636995	-	9103	protein_coding	zinc finger GRF-type containing 1 [Source:HGNC Symbol;Acc:HGNC:25654]	-
ENSG00000163820	12.5656	5.92721	12.5545	4.97446	6.36916	FYCO1	3	45917899	45995824	-	8895	protein_coding	FYVE and coiled-coil domain containing 1 [Source:HGNC Symbol;Acc:HGNC:14673]	-
ENSG00000005469	11.8705	5.46347	11.0593	5.98004	5.58588	CROT	7	87345681	87399795	+	4979	protein_coding	carnitine O-octanoyltransferase [Source:HGNC Symbol;Acc:HGNC:2366]	-
ENSG00000157600	5.27051	2.07511	3.9213	2.34581	2.36484	TMEM164	X	110002631	110182734	+	6583	protein_coding	transmembrane protein 164 [Source:HGNC Symbol;Acc:HGNC:26217]	-
ENSG00000164087	2.34202	8.16347	2.14082	6.6345	6.9727	POC1A	3	52075253	52154690	-	2247	protein_coding	POC1 centriolar protein A [Source:HGNC Symbol;Acc:HGNC:24488]	-
ENSG00000178919	6.68284	15.1932	5.14163	10.3166	13.3979	FOXE1	9	97853254	97856715	+	3462	protein_coding	forkhead box E1 [Source:HGNC Symbol;Acc:HGNC:3806]	Fork
ENSG00000174099	17.4028	29.0689	14.6377	31.0028	33.2573	MSRB3	12	65278643	65491430	+	7405	protein_coding	methionine sulfoxide reductase B3 [Source:HGNC Symbol;Acc:HGNC:27375]	-
ENSG00000085719	33.4741	18.101	25.2663	14.9323	19.4107	CPNE3	8	86514427	86561498	+	6745	protein_coding	copine 3 [Source:HGNC Symbol;Acc:HGNC:2316]	-
ENSG00000147274	14.357	24.9455	21.1811	24.5644	23.3351	RBMX	X	136848004	136880764	-	5882	protein_coding	RNA binding motif protein X-linked [Source:HGNC Symbol;Acc:HGNC:9910]	-
ENSG00000157227	585.851	345.317	587.117	346.375	343.746	MMP14	14	22836557	22849027	+	4464	protein_coding	matrix metallopeptidase 14 [Source:HGNC Symbol;Acc:HGNC:7160]	-
ENSG00000126522	4.08291	10.5977	6.45677	12.6188	9.9446	ASL	7	66075798	66093558	+	3195	protein_coding	argininosuccinate lyase [Source:HGNC Symbol;Acc:HGNC:746]	-
ENSG00000127528	16.3205	32.7341	8.32743	41.6718	33.6463	KLF2	19	16324817	16327874	+	2018	protein_coding	Kruppel like factor 2 [Source:HGNC Symbol;Acc:HGNC:6347]	zf-C2H2
ENSG00000157216	18.2729	9.35836	24.3591	11.0555	10.1813	SSBP3	1	54225432	54413479	-	5227	protein_coding	single stranded DNA binding protein 3 [Source:HGNC Symbol;Acc:HGNC:15674]	-
ENSG00000105738	5.32968	10.7739	5.28651	7.05709	10.87	SIPA1L3	19	37907228	38208372	+	10335	protein_coding	signal induced proliferation associated 1 like 3 [Source:HGNC Symbol;Acc:HGNC:23801]	-
ENSG00000132436	1.04868	3.78035	0.982745	3.21735	3.74916	FIGNL1	7	50444128	50542535	-	5034	protein_coding	fidgetin like 1 [Source:HGNC Symbol;Acc:HGNC:13286]	-
ENSG00000276107	9.00281	29.0932	18.9828	36.429	23.1214	AC037198.1	15	39586561	39587293	+	733	sense_intronic	novel transcript, sense intronic to THBS1	-
ENSG00000065308	36.7495	63.345	36.9939	49.9595	65.7852	TRAM2	6	52497402	52576915	-	6908	protein_coding	translocation associated membrane protein 2 [Source:HGNC Symbol;Acc:HGNC:16855]	-
ENSG00000149090	78.9335	44.0981	102.175	52.4236	45.2173	PAMR1	11	35431823	35530300	-	3863	protein_coding	peptidase domain containing associated with muscle regeneration 1 [Source:HGNC Symbol;Acc:HGNC:24554]	-
ENSG00000197299	0.14438	1.34378	0.08288	0.878484	1.26414	BLM	15	90717327	90816165	+	6674	protein_coding	Bloom syndrome RecQ like helicase [Source:HGNC Symbol;Acc:HGNC:1058]	-
ENSG00000156136	5.13977	12.1478	4.4681	10.908	12.0044	DCK	4	70992538	71030914	+	3227	protein_coding	deoxycytidine kinase [Source:HGNC Symbol;Acc:HGNC:2704]	-
ENSG00000132670	31.2625	17.1844	23.5212	16.6413	17.2186	PTPRA	20	2864184	3039076	+	4469	protein_coding	protein tyrosine phosphatase, receptor type A [Source:HGNC Symbol;Acc:HGNC:9664]	-
ENSG00000153132	4.24038	0.805837	5.48895	0.829952	0.858286	CLGN	4	140388455	140427968	-	3127	protein_coding	calmegin [Source:HGNC Symbol;Acc:HGNC:2060]	-
ENSG00000102172	31.4595	60.7978	36.2468	69.5297	57.7563	SMS	X	21940573	21994835	+	2160	protein_coding	spermine synthase [Source:HGNC Symbol;Acc:HGNC:11123]	-
ENSG00000135046	84.9139	151.703	101.064	160.295	141.819	ANXA1	9	73151757	73170393	+	4561	protein_coding	annexin A1 [Source:HGNC Symbol;Acc:HGNC:533]	-
ENSG00000100644	38.1732	63.1506	31.0301	65.3119	72.8642	HIF1A	14	61695513	61748259	+	5151	protein_coding	hypoxia inducible factor 1 subunit alpha [Source:HGNC Symbol;Acc:HGNC:4910]	Others
ENSG00000136048	27.1787	45.3039	33.841	37.8506	40.8894	DRAM1	12	101877351	102012130	+	4180	protein_coding	DNA damage regulated autophagy modulator 1 [Source:HGNC Symbol;Acc:HGNC:25645]	-
ENSG00000135045	4.2816	12.4465	4.10624	11.5451	11.5945	C9orf40	9	74946581	74952886	-	2327	protein_coding	chromosome 9 open reading frame 40 [Source:HGNC Symbol;Acc:HGNC:23433]	-
ENSG00000115415	79.152	47.011	52.2445	45.9912	52.0742	STAT1	2	190964358	191020960	-	6053	protein_coding	signal transducer and activator of transcription 1 [Source:HGNC Symbol;Acc:HGNC:11362]	STAT
ENSG00000177409	8.78956	3.43328	7.77254	3.01119	4.40829	SAMD9L	7	93130055	93148369	-	7135	protein_coding	sterile alpha motif domain containing 9 like [Source:HGNC Symbol;Acc:HGNC:1349]	-
ENSG00000103966	3.1365	6.61387	1.81349	5.1799	5.95617	EHD4	15	41895939	41972578	-	7879	protein_coding	EH domain containing 4 [Source:HGNC Symbol;Acc:HGNC:3245]	-
ENSG00000160445	35.8634	18.8926	36.2535	19.9065	21.824	ZER1	9	128729786	128772414	-	4370	protein_coding	zyg-11 related cell cycle regulator [Source:HGNC Symbol;Acc:HGNC:30960]	-
ENSG00000163535	1.19698	4.08796	1.0773	3.11936	4.28227	SGO2	2	200510008	200583782	+	6022	protein_coding	shugoshin 2 [Source:HGNC Symbol;Acc:HGNC:30812]	-
ENSG00000165732	15.8838	28.0867	8.65872	24.0109	30.6565	DDX21	10	68956128	68985073	+	5020	protein_coding	DExD-box helicase 21 [Source:HGNC Symbol;Acc:HGNC:2744]	-
ENSG00000160710	39.4483	22.2314	33.3895	20.0469	24.1802	ADAR	1	154582057	154628013	-	9691	protein_coding	adenosine deaminase, RNA specific [Source:HGNC Symbol;Acc:HGNC:225]	-
ENSG00000066027	18.3657	8.35904	22.0349	8.60114	10.3237	PPP2R5A	1	212285537	212361863	+	3825	protein_coding	protein phosphatase 2 regulatory subunit B'alpha [Source:HGNC Symbol;Acc:HGNC:9309]	-
ENSG00000139364	1.97064	0.704847	2.35644	0.718745	0.90627	TMEM132B	12	125186836	125662377	+	15703	protein_coding	transmembrane protein 132B [Source:HGNC Symbol;Acc:HGNC:29397]	-
ENSG00000183770	75.2507	37.0122	95.4288	52.4379	42.6185	FOXL2	3	138944224	138947140	-	2917	protein_coding	forkhead box L2 [Source:HGNC Symbol;Acc:HGNC:1092]	Fork
ENSG00000170390	4.54528	10.7159	5.39078	13.8058	13.2611	DCLK2	4	150078274	150257457	+	4606	protein_coding	doublecortin like kinase 2 [Source:HGNC Symbol;Acc:HGNC:19002]	-
ENSG00000104763	14.7689	8.81311	13.4632	8.02598	8.78379	ASAH1	8	18055992	18084998	-	15378	protein_coding	N-acylsphingosine amidohydrolase 1 [Source:HGNC Symbol;Acc:HGNC:735]	-
ENSG00000169902	31.9311	16.9703	31.9441	20.9002	19.7421	TPST1	7	66205199	66420543	+	2923	protein_coding	tyrosylprotein sulfotransferase 1 [Source:HGNC Symbol;Acc:HGNC:12020]	-
ENSG00000156804	6.18959	2.71443	13.1624	4.48246	3.80177	FBXO32	8	123497889	123541206	-	7395	protein_coding	F-box protein 32 [Source:HGNC Symbol;Acc:HGNC:16731]	-
ENSG00000114573	38.2001	21.9689	23.8782	23.7521	25.5937	ATP6V1A	3	113747019	113812056	+	5130	protein_coding	ATPase H+ transporting V1 subunit A [Source:HGNC Symbol;Acc:HGNC:851]	-
ENSG00000186638	0.225316	1.59381	0.291168	0.959555	1.474	KIF24	9	34252381	34311371	-	6131	protein_coding	kinesin family member 24 [Source:HGNC Symbol;Acc:HGNC:19916]	-
ENSG00000120549	2.70169	0.816664	2.3936	0.52938	0.779007	KIAA1217	10	23694746	24547848	+	10807	protein_coding	KIAA1217 [Source:HGNC Symbol;Acc:HGNC:25428]	-
ENSG00000165724	7.86619	17.308	6.17611	17.5304	14.1537	ZMYND19	9	137582079	137590490	-	2372	protein_coding	zinc finger MYND-type containing 19 [Source:HGNC Symbol;Acc:HGNC:21146]	-
ENSG00000084774	10.6013	18.2753	8.40689	14.2739	17.0915	CAD	2	27217390	27243943	+	8422	protein_coding	carbamoyl-phosphate synthetase 2, aspartate transcarbamylase, and dihydroorotase [Source:HGNC Symbol;Acc:HGNC:1424]	-
ENSG00000278259	1.78558	3.78522	1.62905	3.01792	3.44028	MYO19	17	36495633	36543435	-	13075	protein_coding	myosin XIX [Source:HGNC Symbol;Acc:HGNC:26234]	-
ENSG00000197043	67.8693	108.968	89.3157	113.929	104.783	ANXA6	5	151100712	151157882	-	5427	protein_coding	annexin A6 [Source:HGNC Symbol;Acc:HGNC:544]	-
ENSG00000170545	2.9817	7.85804	2.85613	7.15833	6.49108	SMAGP	12	51244558	51270890	-	3558	protein_coding	small cell adhesion glycoprotein [Source:HGNC Symbol;Acc:HGNC:26918]	-
ENSG00000204592	93.1087	52.805	103.361	65.8433	53.2416	HLA-E	6	30489467	30494205	+	2975	protein_coding	major histocompatibility complex, class I, E [Source:HGNC Symbol;Acc:HGNC:4962]	-
ENSG00000196141	12.2202	21.0385	12.1159	18.6035	20.1644	SPATS2L	2	200305881	200482263	+	10437	protein_coding	spermatogenesis associated serine rich 2 like [Source:HGNC Symbol;Acc:HGNC:24574]	-
ENSG00000011422	10.7982	20.8564	12.3618	18.7144	17.7325	PLAUR	19	43646095	43670547	-	4457	protein_coding	plasminogen activator, urokinase receptor [Source:HGNC Symbol;Acc:HGNC:9053]	-
ENSG00000162664	1.57104	3.66733	1.8531	3.11667	3.25406	ZNF326	1	89995112	90035531	+	10984	protein_coding	zinc finger protein 326 [Source:HGNC Symbol;Acc:HGNC:14104]	-
ENSG00000119333	16.195	32.8954	16.654	36.3334	29.5695	WDR34	9	128633661	128656787	-	2604	protein_coding	WD repeat domain 34 [Source:HGNC Symbol;Acc:HGNC:28296]	-
ENSG00000080839	1.15998	3.6709	0.869219	2.37501	3.28809	RBL1	20	36996349	37095995	-	5954	protein_coding	RB transcriptional corepressor like 1 [Source:HGNC Symbol;Acc:HGNC:9893]	-
ENSG00000167964	3.26121	0.250246	3.10499	0.373899	0.36793	RAB26	16	2140803	2154165	+	2488	protein_coding	RAB26, member RAS oncogene family [Source:HGNC Symbol;Acc:HGNC:14259]	-
ENSG00000204131	0.409022	1.33355	0.902599	1.07633	1.45226	NHSL2	X	71910818	72161750	+	17706	protein_coding	NHS like 2 [Source:HGNC Symbol;Acc:HGNC:33737]	-
ENSG00000196584	0.50517	2.75673	0.310272	1.77959	2.65829	XRCC2	7	152644779	152676165	-	4853	protein_coding	X-ray repair cross complementing 2 [Source:HGNC Symbol;Acc:HGNC:12829]	-
ENSG00000105281	27.7341	48.1394	18.4845	50.4778	51.8384	SLC1A5	19	46774883	46788594	-	3332	protein_coding	solute carrier family 1 member 5 [Source:HGNC Symbol;Acc:HGNC:10943]	-
ENSG00000239779	10.4145	3.31657	11.5891	3.38574	2.92977	WBP1	2	74458329	74460891	+	2438	protein_coding	WW domain binding protein 1 [Source:HGNC Symbol;Acc:HGNC:12737]	-
ENSG00000029153	1.67625	4.71353	1.30533	4.57013	5.04828	ARNTL2	12	27332854	27425289	+	6983	protein_coding	aryl hydrocarbon receptor nuclear translocator like 2 [Source:HGNC Symbol;Acc:HGNC:18984]	bHLH
ENSG00000170266	45.7469	26.5464	43.9533	24.1778	28.0931	GLB1	3	32996608	33097230	-	4364	protein_coding	galactosidase beta 1 [Source:HGNC Symbol;Acc:HGNC:4298]	-
ENSG00000118985	28.2594	46.0524	33.3432	51.4646	53.984	ELL2	5	95885098	95962071	-	7328	protein_coding	elongation factor for RNA polymerase II 2 [Source:HGNC Symbol;Acc:HGNC:17064]	-
ENSG00000105810	4.00194	8.5198	4.1571	7.24903	9.38416	CDK6	7	92604921	92836594	-	12260	protein_coding	cyclin dependent kinase 6 [Source:HGNC Symbol;Acc:HGNC:1777]	-
ENSG00000261786	1.79371	5.64017	1.23078	4.01243	4.38923	AC006058.1	3	44117299	44122365	+	5067	lincRNA	novel transcript	-
ENSG00000110092	224.787	355.904	196.243	280.427	346.874	CCND1	11	69641087	69654474	+	4830	protein_coding	cyclin D1 [Source:HGNC Symbol;Acc:HGNC:1582]	-
ENSG00000205413	5.46385	2.03987	5.09177	2.20372	2.61067	SAMD9	7	93099513	93118023	-	6855	protein_coding	sterile alpha motif domain containing 9 [Source:HGNC Symbol;Acc:HGNC:1348]	-
ENSG00000185347	0.51722	2.22877	0.466624	2.69484	1.82329	TEDC1	14	105489855	105499575	+	6698	protein_coding	tubulin epsilon and delta complex 1 [Source:HGNC Symbol;Acc:HGNC:20127]	-
ENSG00000124762	469.478	274.957	548.717	226.668	217.75	CDKN1A	6	36676460	36687339	+	3050	protein_coding	cyclin dependent kinase inhibitor 1A [Source:HGNC Symbol;Acc:HGNC:1784]	-
ENSG00000121390	5.54244	11.4865	5.74372	10.7879	10.7903	PSPC1	13	19674752	19783019	-	4817	protein_coding	paraspeckle component 1 [Source:HGNC Symbol;Acc:HGNC:20320]	-
ENSG00000112039	2.32106	7.36996	3.46285	5.20607	5.07983	FANCE	6	35452356	35467103	+	2692	protein_coding	FA complementation group E [Source:HGNC Symbol;Acc:HGNC:3586]	-
ENSG00000169813	43.5913	69.6616	39.5764	62.3924	63.8126	HNRNPF	10	43385617	43409166	-	3253	protein_coding	heterogeneous nuclear ribonucleoprotein F [Source:HGNC Symbol;Acc:HGNC:5039]	-
ENSG00000166881	3.91834	8.4298	3.72805	4.76552	7.62047	NEMP1	12	57055643	57088063	-	5708	protein_coding	nuclear envelope integral membrane protein 1 [Source:HGNC Symbol;Acc:HGNC:29001]	-
ENSG00000134824	72.1301	37.3618	53.5531	31.1891	43.1854	FADS2	11	61792980	61867354	+	11026	protein_coding	fatty acid desaturase 2 [Source:HGNC Symbol;Acc:HGNC:3575]	-
ENSG00000164237	18.3293	8.95899	21.6563	8.60839	9.73333	CMBL	5	10275875	10308026	-	3324	protein_coding	carboxymethylenebutenolidase homolog [Source:HGNC Symbol;Acc:HGNC:25090]	-
ENSG00000173918	12.3444	5.8186	17.716	6.70553	5.47968	C1QTNF1	17	79022814	79049788	+	4854	protein_coding	C1q and TNF related 1 [Source:HGNC Symbol;Acc:HGNC:14324]	-
ENSG00000154319	0.704919	3.03051	0.757244	1.99255	2.39536	FAM167A	8	11421463	11475908	-	5076	protein_coding	family with sequence similarity 167 member A [Source:HGNC Symbol;Acc:HGNC:15549]	-
ENSG00000214944	1.20367	2.70625	0.884327	1.65667	2.27255	ARHGEF28	5	73626158	73941993	+	15617	protein_coding	Rho guanine nucleotide exchange factor 28 [Source:HGNC Symbol;Acc:HGNC:30322]	-
ENSG00000116209	31.7153	17.7263	32.7336	24.5806	19.8519	TMEM59	1	54026681	54053504	-	9149	protein_coding	transmembrane protein 59 [Source:HGNC Symbol;Acc:HGNC:1239]	-
ENSG00000239306	8.12159	15.7463	8.13725	13.4392	14.0233	RBM14	11	66616582	66627347	+	3937	protein_coding	RNA binding motif protein 14 [Source:HGNC Symbol;Acc:HGNC:14219]	-
ENSG00000266412	92.1897	57.0159	88.7298	62.178	65.2704	NCOA4	10	46005088	46030714	-	4079	protein_coding	nuclear receptor coactivator 4 [Source:HGNC Symbol;Acc:HGNC:7671]	-
ENSG00000097046	0.487329	2.94048	0.419631	2.34738	2.4563	CDC7	1	91500893	91525764	+	3557	protein_coding	cell division cycle 7 [Source:HGNC Symbol;Acc:HGNC:1745]	-
ENSG00000104881	3.38341	8.24984	7.91844	7.31864	8.28314	PPP1R13L	19	45379634	45406349	-	5032	protein_coding	protein phosphatase 1 regulatory subunit 13 like [Source:HGNC Symbol;Acc:HGNC:18838]	-
ENSG00000163950	27.9589	48.5542	19.2648	50.8599	40.4806	SLBP	4	1692800	1712555	-	2026	protein_coding	stem-loop binding protein [Source:HGNC Symbol;Acc:HGNC:10904]	-
ENSG00000013619	0.220879	1.54805	0.221278	1.06998	1.2341	MAMLD1	X	150361422	150514178	+	5958	protein_coding	mastermind like domain containing 1 [Source:HGNC Symbol;Acc:HGNC:2568]	-
ENSG00000132507	83.9483	161.815	89.7987	144.072	138.155	EIF5A	17	7306999	7312463	+	2815	protein_coding	eukaryotic translation initiation factor 5A [Source:HGNC Symbol;Acc:HGNC:3300]	-
ENSG00000125347	4.47279	1.64878	5.51163	2.10543	1.60064	IRF1	5	132481609	132490798	-	7799	protein_coding	interferon regulatory factor 1 [Source:HGNC Symbol;Acc:HGNC:6116]	IRF
ENSG00000124788	5.19263	2.44977	5.83468	3.08957	3.62617	ATXN1	6	16299112	16761491	-	17812	protein_coding	ataxin 1 [Source:HGNC Symbol;Acc:HGNC:10548]	-
ENSG00000134986	4.85126	10.1232	10.7857	16.1429	12.9818	NREP	5	111662621	111997464	-	9337	protein_coding	neuronal regeneration related protein [Source:HGNC Symbol;Acc:HGNC:16834]	-
ENSG00000213024	9.32294	16.6796	9.9303	14.2161	15.1273	NUP62	19	49906825	49929763	-	6020	protein_coding	nucleoporin 62 [Source:HGNC Symbol;Acc:HGNC:8066]	-
ENSG00000151503	2.63835	5.46569	1.66195	4.07606	5.15464	NCAPD3	11	134150119	134225454	-	9114	protein_coding	non-SMC condensin II complex subunit D3 [Source:HGNC Symbol;Acc:HGNC:28952]	-
ENSG00000186340	75.6094	131.071	163.72	117.493	133.902	THBS2	6	169215780	169254044	-	6412	protein_coding	thrombospondin 2 [Source:HGNC Symbol;Acc:HGNC:11786]	-
ENSG00000038382	11.19	21.4202	13.5523	17.0169	23.1058	TRIO	5	14143702	14532128	+	17500	protein_coding	trio Rho guanine nucleotide exchange factor [Source:HGNC Symbol;Acc:HGNC:12303]	-
ENSG00000146376	5.1743	10.7581	4.58714	9.1886	10.4614	ARHGAP18	6	129576132	129710225	-	4640	protein_coding	Rho GTPase activating protein 18 [Source:HGNC Symbol;Acc:HGNC:21035]	-
ENSG00000183684	29.2333	54.434	23.2408	65.7261	50.7327	ALYREF	17	81887844	81891586	-	1574	protein_coding	Aly/REF export factor [Source:HGNC Symbol;Acc:HGNC:19071]	-
ENSG00000197771	8.76808	16.1847	7.38467	14.667	16.5155	MCMBP	10	119829404	119892556	-	6000	protein_coding	minichromosome maintenance complex binding protein [Source:HGNC Symbol;Acc:HGNC:25782]	-
ENSG00000073464	2.09187	0.460655	1.66478	0.605692	0.582111	CLCN4	X	10156945	10237660	+	6789	protein_coding	chloride voltage-gated channel 4 [Source:HGNC Symbol;Acc:HGNC:2022]	-
ENSG00000174348	4.86279	10.8904	10.4887	13.126	12.4316	PODN	1	53062052	53085502	+	4900	protein_coding	podocan [Source:HGNC Symbol;Acc:HGNC:23174]	-
ENSG00000167470	36.7246	19.4479	37.5015	19.7874	20.5086	MIDN	19	1248553	1259140	+	4492	protein_coding	midnolin [Source:HGNC Symbol;Acc:HGNC:16298]	-
ENSG00000115163	0.387683	4.05467	0.344909	3.30953	4.05737	CENPA	2	26764289	26801067	+	1983	protein_coding	centromere protein A [Source:HGNC Symbol;Acc:HGNC:1851]	-
ENSG00000125864	2.78648	0.38014	2.95741	0.55055	0.526066	BFSP1	20	17493905	17569220	-	3361	protein_coding	beaded filament structural protein 1 [Source:HGNC Symbol;Acc:HGNC:1040]	-
ENSG00000136999	5.66663	13.0729	10.2064	6.76441	9.493	NOV	8	119416306	119424353	+	2673	protein_coding	nephroblastoma overexpressed [Source:HGNC Symbol;Acc:HGNC:7885]	-
ENSG00000182378	1.57427	4.45427	2.47457	3.53858	4.09522	PLCXD1	X	276322	303356	+	6191	protein_coding	phosphatidylinositol specific phospholipase C X domain containing 1 [Source:HGNC Symbol;Acc:HGNC:23148]	-
ENSG00000074370	1.14739	0.0886243	1.58766	0.180262	0.147853	ATP2A3	17	3923870	3964464	-	6893	protein_coding	ATPase sarcoplasmic/endoplasmic reticulum Ca2+ transporting 3 [Source:HGNC Symbol;Acc:HGNC:813]	-
ENSG00000101361	10.9413	19.8222	8.54509	18.5374	18.5486	NOP56	20	2652145	2658393	+	5398	protein_coding	NOP56 ribonucleoprotein [Source:HGNC Symbol;Acc:HGNC:15911]	-
ENSG00000152104	3.58149	7.42107	3.10839	6.503	8.03432	PTPN14	1	214348696	214552449	-	18756	protein_coding	protein tyrosine phosphatase, non-receptor type 14 [Source:HGNC Symbol;Acc:HGNC:9647]	-
ENSG00000044574	268.912	169.162	277.575	227.408	212.105	HSPA5	9	125234853	125241330	-	3908	protein_coding	heat shock protein family A (Hsp70) member 5 [Source:HGNC Symbol;Acc:HGNC:5238]	-
ENSG00000034152	24.0447	42.7349	15.6248	41.9339	42.8349	MAP2K3	17	21284672	21315240	+	3783	protein_coding	mitogen-activated protein kinase kinase 3 [Source:HGNC Symbol;Acc:HGNC:6843]	-
ENSG00000137124	7.28754	16.9615	5.43539	17.8082	16.6927	ALDH1B1	9	38392664	38398661	+	3155	protein_coding	aldehyde dehydrogenase 1 family member B1 [Source:HGNC Symbol;Acc:HGNC:407]	-
ENSG00000131504	13.0592	21.6285	10.2839	16.3954	20.8106	DIAPH1	5	141515016	141619055	-	7375	protein_coding	diaphanous related formin 1 [Source:HGNC Symbol;Acc:HGNC:2876]	-
ENSG00000131470	0.524615	3.63581	0.699105	2.50463	2.7029	PSMC3IP	17	42572315	42577831	-	2573	protein_coding	PSMC3 interacting protein [Source:HGNC Symbol;Acc:HGNC:17928]	-
ENSG00000168386	6.48828	13.6011	7.39238	13.0903	16.1602	FILIP1L	3	99830141	100114513	-	5903	protein_coding	filamin A interacting protein 1 like [Source:HGNC Symbol;Acc:HGNC:24589]	-
ENSG00000162704	17.5792	28.3907	13.7538	34.9382	30.2515	ARPC5	1	183620846	183635757	-	10624	protein_coding	actin related protein 2/3 complex subunit 5 [Source:HGNC Symbol;Acc:HGNC:708]	-
ENSG00000137809	8.59316	4.23526	11.1412	4.58617	4.71336	ITGA11	15	68296533	68432162	-	10864	protein_coding	integrin subunit alpha 11 [Source:HGNC Symbol;Acc:HGNC:6136]	-
ENSG00000135486	80.3883	125.352	78.1711	124.056	117.231	HNRNPA1	12	54280193	54287088	+	5093	protein_coding	heterogeneous nuclear ribonucleoprotein A1 [Source:HGNC Symbol;Acc:HGNC:5031]	-
ENSG00000171617	8.48722	15.3049	10.5663	17.5724	22.6233	ENC1	5	74627406	74641424	-	5858	protein_coding	ectodermal-neural cortex 1 [Source:HGNC Symbol;Acc:HGNC:3345]	-
ENSG00000145685	6.35017	2.78243	5.54999	2.61672	3.2625	LHFPL2	5	78485215	78770021	-	7977	protein_coding	LHFPL tetraspan subfamily member 2 [Source:HGNC Symbol;Acc:HGNC:6588]	-
ENSG00000146143	2.51243	6.11027	2.51512	4.80602	5.80611	PRIM2	6	57314805	57646849	+	4667	protein_coding	DNA primase subunit 2 [Source:HGNC Symbol;Acc:HGNC:9370]	-
ENSG00000069424	2.71199	0.846365	2.7103	1.13529	1.0523	KCNAB2	1	5991466	6101193	+	9534	protein_coding	potassium voltage-gated channel subfamily A regulatory beta subunit 2 [Source:HGNC Symbol;Acc:HGNC:6229]	-
ENSG00000170502	20.0512	9.28386	12.1376	10.9969	9.68378	NUDT9	4	87422582	87459454	+	3184	protein_coding	nudix hydrolase 9 [Source:HGNC Symbol;Acc:HGNC:8056]	-
ENSG00000022267	11.7515	24.137	16.6702	31.8314	29.9267	FHL1	X	136146702	136211359	+	5997	protein_coding	four and a half LIM domains 1 [Source:HGNC Symbol;Acc:HGNC:3702]	-
ENSG00000130204	13.7229	26.5654	11.1427	26.8378	25.6779	TOMM40	19	44890569	44903689	+	3610	protein_coding	translocase of outer mitochondrial membrane 40 [Source:HGNC Symbol;Acc:HGNC:18001]	-
ENSG00000132341	54.6622	88.9298	44.5112	98.0019	81.9156	RAN	12	130871879	130877678	+	4825	protein_coding	RAN, member RAS oncogene family [Source:HGNC Symbol;Acc:HGNC:9846]	-
ENSG00000136982	1.15694	5.02889	0.764876	4.58165	4.69966	DSCC1	8	119833976	119856010	-	2603	protein_coding	DNA replication and sister chromatid cohesion 1 [Source:HGNC Symbol;Acc:HGNC:24453]	-
ENSG00000121621	0.913024	3.38676	0.520041	2.35858	3.19288	KIF18A	11	28020620	28108308	-	4668	protein_coding	kinesin family member 18A [Source:HGNC Symbol;Acc:HGNC:29441]	-
ENSG00000179630	4.87255	1.58265	3.36041	2.27408	2.52992	LACC1	13	43879284	43893932	+	4550	protein_coding	laccase domain containing 1 [Source:HGNC Symbol;Acc:HGNC:26789]	-
ENSG00000115539	6.66824	15.9688	5.65811	17.2099	12.6642	PDCL3	2	100562690	100576735	+	1831	protein_coding	phosducin like 3 [Source:HGNC Symbol;Acc:HGNC:28860]	-
ENSG00000136156	28.3989	16.9651	28.2293	19.8246	17.2395	ITM2B	13	48232612	48270357	+	10706	protein_coding	integral membrane protein 2B [Source:HGNC Symbol;Acc:HGNC:6174]	-
ENSG00000173598	14.5263	8.30643	22.1947	7.83323	9.24215	NUDT4	12	93377883	93408146	+	10078	protein_coding	nudix hydrolase 4 [Source:HGNC Symbol;Acc:HGNC:8051]	-
ENSG00000148840	7.06232	13.6389	6.04268	10.9714	14.5077	PPRC1	10	102132994	102150331	+	6095	protein_coding	peroxisome proliferator-activated receptor gamma, coactivator-related 1 [Source:HGNC Symbol;Acc:HGNC:30025]	-
ENSG00000111206	6.75928	12.7806	5.66041	6.81283	10.9999	FOXM1	12	2857681	2877155	-	4899	protein_coding	forkhead box M1 [Source:HGNC Symbol;Acc:HGNC:3818]	Fork
ENSG00000173442	11.6112	21.6744	13.6004	31.496	20.898	EHBP1L1	11	65576038	65592650	+	6741	protein_coding	EH domain binding protein 1 like 1 [Source:HGNC Symbol;Acc:HGNC:30682]	-
ENSG00000172757	127.798	220.244	136.769	262.169	191.746	CFL1	11	65823022	65862026	-	5863	protein_coding	cofilin 1 [Source:HGNC Symbol;Acc:HGNC:1874]	-
ENSG00000136261	7.05087	14.5435	7.75623	13.84	14.6196	BZW2	7	16646131	16706523	+	3662	protein_coding	basic leucine zipper and W2 domains 2 [Source:HGNC Symbol;Acc:HGNC:18808]	-
ENSG00000099901	9.73696	19.2219	8.77142	23.9642	16.8358	RANBP1	22	20115938	20127357	+	4622	protein_coding	RAN binding protein 1 [Source:HGNC Symbol;Acc:HGNC:9847]	-
ENSG00000179051	17.3912	29.2753	22.367	28.9659	29.5726	RCC2	1	17406760	17439724	-	4126	protein_coding	regulator of chromosome condensation 2 [Source:HGNC Symbol;Acc:HGNC:30297]	-
ENSG00000106031	15.6738	8.31665	13.1315	10.3942	9.92696	HOXA13	7	27193503	27200106	-	5086	protein_coding	homeobox A13 [Source:HGNC Symbol;Acc:HGNC:5102]	Homeobox
ENSG00000100139	10.3313	18.9705	7.81126	15.8901	18.6252	MICALL1	22	37905657	37942822	+	5968	protein_coding	MICAL like 1 [Source:HGNC Symbol;Acc:HGNC:29804]	-
ENSG00000183087	110.858	180.268	119.846	188.025	165.184	GAS6	13	113820549	113864067	-	6006	protein_coding	growth arrest specific 6 [Source:HGNC Symbol;Acc:HGNC:4168]	-
ENSG00000102780	0.335004	1.09966	0.478592	0.840952	1.0984	DGKH	13	42040036	42256578	+	19637	protein_coding	diacylglycerol kinase eta [Source:HGNC Symbol;Acc:HGNC:2854]	-
ENSG00000152223	5.66849	11.0976	5.19563	7.48797	11.1991	EPG5	18	45847609	45967339	-	13740	protein_coding	ectopic P-granules autophagy protein 5 homolog [Source:HGNC Symbol;Acc:HGNC:29331]	-
ENSG00000123737	4.58538	9.49073	2.97	9.9677	8.49908	EXOSC9	4	121801317	121817021	+	4711	protein_coding	exosome component 9 [Source:HGNC Symbol;Acc:HGNC:9137]	-
ENSG00000161692	0.594974	2.21311	0.749414	1.58179	2.27899	DBF4B	17	44708608	44752264	+	7146	protein_coding	DBF4 zinc finger B [Source:HGNC Symbol;Acc:HGNC:17883]	-
ENSG00000125885	0.634621	2.28085	0.521766	1.61841	2.31519	MCM8	20	5950652	5998977	+	7691	protein_coding	minichromosome maintenance 8 homologous recombination repair factor [Source:HGNC Symbol;Acc:HGNC:16147]	-
ENSG00000113504	4.61206	1.66447	5.57792	1.93996	1.59774	SLC12A7	5	1050376	1112035	-	5984	protein_coding	solute carrier family 12 member 7 [Source:HGNC Symbol;Acc:HGNC:10915]	-
ENSG00000197208	5.33269	12.4555	11.2206	8.91488	9.93286	SLC22A4	5	132294443	132344206	+	2688	protein_coding	solute carrier family 22 member 4 [Source:HGNC Symbol;Acc:HGNC:10968]	-
ENSG00000090339	9.6269	4.00874	19.7182	4.232	4.3425	ICAM1	19	10270835	10286615	+	3706	protein_coding	intercellular adhesion molecule 1 [Source:HGNC Symbol;Acc:HGNC:5344]	-
ENSG00000154920	0.161763	1.95194	0.407358	1.32953	1.55487	EME1	17	50373220	50381483	+	3294	protein_coding	essential meiotic structure-specific endonuclease 1 [Source:HGNC Symbol;Acc:HGNC:24965]	-
ENSG00000175550	95.177	179.913	95.8301	288.067	144.798	DRAP1	11	65919257	65921561	+	1737	protein_coding	DR1 associated protein 1 [Source:HGNC Symbol;Acc:HGNC:3019]	-
ENSG00000155189	3.08733	7.25422	3.45727	5.75054	6.07519	AGPAT5	8	6708357	6759666	+	4684	protein_coding	1-acylglycerol-3-phosphate O-acyltransferase 5 [Source:HGNC Symbol;Acc:HGNC:20886]	-
ENSG00000113369	10.7751	4.66897	25.257	8.13857	6.17145	ARRDC3	5	91368724	91383359	-	4934	protein_coding	arrestin domain containing 3 [Source:HGNC Symbol;Acc:HGNC:29263]	-
ENSG00000260578	0.760614	3.53263	0.888944	3.21556	3.26832	AC110597.1	18	67481791	67484966	-	3176	lincRNA	novel transcript	-
ENSG00000132471	29.8649	17.173	27.3664	14.9256	15.9974	WBP2	17	75845699	75856507	-	5399	protein_coding	WW domain binding protein 2 [Source:HGNC Symbol;Acc:HGNC:12738]	-
ENSG00000205336	3.83118	1.58359	5.95601	1.65841	1.9697	ADGRG1	16	57610652	57665580	+	8659	protein_coding	adhesion G protein-coupled receptor G1 [Source:HGNC Symbol;Acc:HGNC:4512]	-
ENSG00000171658	6.02024	1.09047	2.97207	2.54115	2.51374	NMRAL2P	3	185959943	185980872	+	2628	transcribed_unprocessed_pseudogene	NmrA like redox sensor 2, pseudogene [Source:HGNC Symbol;Acc:HGNC:52332]	-
ENSG00000172890	7.38875	4.193	7.8097	4.45442	4.56753	NADSYN1	11	71453109	71524107	+	16263	protein_coding	NAD synthetase 1 [Source:HGNC Symbol;Acc:HGNC:29832]	-
ENSG00000072274	22.0195	40.7889	6.63187	24.2644	32.2559	TFRC	3	196027183	196082189	-	7887	protein_coding	transferrin receptor [Source:HGNC Symbol;Acc:HGNC:11763]	-
ENSG00000243244	4.73921	1.92932	5.74806	1.78508	1.91539	STON1	2	48529383	48598513	+	7709	protein_coding	stonin 1 [Source:HGNC Symbol;Acc:HGNC:17003]	-
ENSG00000138135	4.57267	0.426993	5.62243	2.52588	1.05153	CH25H	10	89205629	89207314	-	1686	protein_coding	cholesterol 25-hydroxylase [Source:HGNC Symbol;Acc:HGNC:1907]	-
ENSG00000159899	31.9001	17.6516	38.2304	20.6722	21.494	NPR2	9	35792154	35809732	+	3865	protein_coding	natriuretic peptide receptor 2 [Source:HGNC Symbol;Acc:HGNC:7944]	-
ENSG00000231925	59.813	34.3519	68.7815	32.9443	33.8943	TAPBP	6	33299694	33314387	-	5056	protein_coding	TAP binding protein [Source:HGNC Symbol;Acc:HGNC:11566]	-
ENSG00000166750	18.1139	9.38007	13.8186	8.65904	11.0219	SLFN5	17	35243036	35273655	+	10709	protein_coding	schlafen family member 5 [Source:HGNC Symbol;Acc:HGNC:28286]	-
ENSG00000179981	16.6521	9.57895	20.6717	11.0731	12.8225	TSHZ1	18	75210755	75289950	+	8281	protein_coding	teashirt zinc finger homeobox 1 [Source:HGNC Symbol;Acc:HGNC:10669]	zf-C2H2
ENSG00000126215	1.06265	3.20995	1.51142	2.82731	2.74755	XRCC3	14	103697609	103715504	-	7507	protein_coding	X-ray repair cross complementing 3 [Source:HGNC Symbol;Acc:HGNC:12830]	-
ENSG00000164086	5.84894	11.1801	6.21906	8.80945	10.9376	DUSP7	3	52048919	52056550	-	5648	protein_coding	dual specificity phosphatase 7 [Source:HGNC Symbol;Acc:HGNC:3073]	-
ENSG00000154065	5.57095	2.30076	6.62093	2.85631	2.50446	ANKRD29	18	23598926	23662885	-	6391	protein_coding	ankyrin repeat domain 29 [Source:HGNC Symbol;Acc:HGNC:27110]	-
ENSG00000204103	2.67855	0.362728	3.63159	0.524059	0.453201	MAFB	20	40685848	40689240	-	3393	protein_coding	MAF bZIP transcription factor B [Source:HGNC Symbol;Acc:HGNC:6408]	TF_bZIP
ENSG00000141429	33.0823	20.0226	25.8615	18.9613	21.8719	GALNT1	18	35581117	35711834	+	5126	protein_coding	polypeptide N-acetylgalactosaminyltransferase 1 [Source:HGNC Symbol;Acc:HGNC:4123]	-
ENSG00000005893	70.8969	45.3968	65.5247	42.135	47.7498	LAMP2	X	120427827	120469365	-	5526	protein_coding	lysosomal associated membrane protein 2 [Source:HGNC Symbol;Acc:HGNC:6501]	-
ENSG00000221955	1.91847	0.359951	1.29395	0.580832	0.540663	SLC12A8	3	125082636	125212864	-	5586	protein_coding	solute carrier family 12 member 8 [Source:HGNC Symbol;Acc:HGNC:15595]	-
ENSG00000104885	3.09799	5.87115	4.35108	5.41959	6.00275	DOT1L	19	2164149	2232578	+	11272	protein_coding	DOT1 like histone lysine methyltransferase [Source:HGNC Symbol;Acc:HGNC:24948]	-
ENSG00000159348	22.7584	12.0628	19.8997	13.8865	11.242	CYB5R1	1	202961869	202967280	-	4504	protein_coding	cytochrome b5 reductase 1 [Source:HGNC Symbol;Acc:HGNC:13397]	-
ENSG00000185507	5.47434	1.27909	5.12408	1.99626	1.5268	IRF7	11	612553	615999	-	2628	protein_coding	interferon regulatory factor 7 [Source:HGNC Symbol;Acc:HGNC:6122]	IRF
ENSG00000014138	0.438877	1.99753	0.470258	2.13415	1.61491	POLA2	11	65261762	65305589	+	5726	protein_coding	DNA polymerase alpha 2, accessory subunit [Source:HGNC Symbol;Acc:HGNC:30073]	-
ENSG00000163430	78.6629	118.999	83.5197	137.131	135.798	FSTL1	3	120392293	120451253	-	8727	protein_coding	follistatin like 1 [Source:HGNC Symbol;Acc:HGNC:3972]	-
ENSG00000101350	25.8163	14.7338	18.612	12.6478	15.4134	KIF3B	20	32277664	32335011	+	6103	protein_coding	kinesin family member 3B [Source:HGNC Symbol;Acc:HGNC:6320]	-
ENSG00000071282	1.86962	4.45092	4.15117	5.01054	4.44495	LMCD1	3	8501707	8574673	+	9130	protein_coding	LIM and cysteine rich domains 1 [Source:HGNC Symbol;Acc:HGNC:6633]	-
ENSG00000183023	1.13225	2.55247	2.31161	2.95338	3.17801	SLC8A1	2	40097270	40611053	-	21922	protein_coding	solute carrier family 8 member A1 [Source:HGNC Symbol;Acc:HGNC:11068]	-
ENSG00000086289	49.9003	28.9717	38.9382	33.3448	32.6532	EPDR1	7	37683843	37951941	+	2864	protein_coding	ependymin related 1 [Source:HGNC Symbol;Acc:HGNC:17572]	-
ENSG00000151914	3.99515	8.31672	5.26456	6.62218	8.2968	DST	6	56457987	56954628	-	42341	protein_coding	dystonin [Source:HGNC Symbol;Acc:HGNC:1090]	-
ENSG00000183763	0.581316	3.28209	0.65054	3.25695	3.06815	TRAIP	3	49828599	49856574	-	3263	protein_coding	TRAF interacting protein [Source:HGNC Symbol;Acc:HGNC:30764]	-
ENSG00000255717	4.75402	10.8296	4.52245	12.3649	10.1384	SNHG1	11	62851988	62855914	-	3756	processed_transcript	small nucleolar RNA host gene 1 [Source:HGNC Symbol;Acc:HGNC:32688]	-
ENSG00000162073	1.50789	5.35938	1.45909	3.60466	4.69854	PAQR4	16	2969245	2973489	+	2972	protein_coding	progestin and adipoQ receptor family member 4 [Source:HGNC Symbol;Acc:HGNC:26386]	-
ENSG00000164692	604.253	985.778	822.023	1177.75	1148.73	COL1A2	7	94394561	94431232	+	11156	protein_coding	collagen type I alpha 2 chain [Source:HGNC Symbol;Acc:HGNC:2198]	-
ENSG00000104361	9.62569	4.67654	10.4577	5.19575	5.75596	NIPAL2	8	98189833	98294393	-	5599	protein_coding	NIPA like domain containing 2 [Source:HGNC Symbol;Acc:HGNC:25854]	-
ENSG00000104611	4.86151	10.4172	4.80857	9.66706	10.8479	SH2D4A	8	19313617	19396218	+	4148	protein_coding	SH2 domain containing 4A [Source:HGNC Symbol;Acc:HGNC:26102]	-
ENSG00000137076	83.5314	137.828	91.2458	117.924	151.784	TLN1	9	35696948	35732395	-	10076	protein_coding	talin 1 [Source:HGNC Symbol;Acc:HGNC:11845]	-
ENSG00000107937	7.11983	12.9128	5.28412	13.8591	11.6313	GTPBP4	10	988019	1019936	+	6540	protein_coding	GTP binding protein 4 [Source:HGNC Symbol;Acc:HGNC:21535]	-
ENSG00000198176	31.2692	49.6469	23.7178	41.8428	47.1333	TFDP1	13	113584721	113641470	+	3741	protein_coding	transcription factor Dp-1 [Source:HGNC Symbol;Acc:HGNC:11749]	E2F
ENSG00000077585	26.0632	12.2125	24.8255	11.9316	11.9945	GPR137B	1	236142505	236221865	+	2309	protein_coding	G protein-coupled receptor 137B [Source:HGNC Symbol;Acc:HGNC:11862]	-
ENSG00000081923	3.31496	7.31408	2.10189	5.50947	7.3648	ATP8B1	18	57646426	57803315	-	7028	protein_coding	ATPase phospholipid transporting 8B1 [Source:HGNC Symbol;Acc:HGNC:3706]	-
ENSG00000120820	22.0149	11.457	20.6611	12.0509	11.8372	GLT8D2	12	103988984	104064183	-	3271	protein_coding	glycosyltransferase 8 domain containing 2 [Source:HGNC Symbol;Acc:HGNC:24890]	-
ENSG00000119801	42.6977	24.414	45.5619	28.1021	26.038	YPEL5	2	30146941	30160533	+	3421	protein_coding	yippee like 5 [Source:HGNC Symbol;Acc:HGNC:18329]	-
ENSG00000113140	397.716	635.015	378.682	709.994	684.39	SPARC	5	151661096	151687165	-	4831	protein_coding	secreted protein acidic and cysteine rich [Source:HGNC Symbol;Acc:HGNC:11219]	-
ENSG00000140534	0.428474	1.81224	0.591108	1.08309	1.66889	TICRR	15	89575482	89631056	+	8402	protein_coding	TOPBP1 interacting checkpoint and replication regulator [Source:HGNC Symbol;Acc:HGNC:28704]	-
ENSG00000129048	0.116687	2.75505	0.400947	1.57147	1.987	ACKR4	3	132597237	132618967	+	2273	protein_coding	atypical chemokine receptor 4 [Source:HGNC Symbol;Acc:HGNC:1611]	-
ENSG00000122877	5.28117	1.30399	13.5709	3.54464	3.04833	EGR2	10	62811996	62919900	-	3689	protein_coding	early growth response 2 [Source:HGNC Symbol;Acc:HGNC:3239]	zf-C2H2
ENSG00000085276	0.883962	2.4464	1.62655	2.10621	2.15963	MECOM	3	169083499	169663618	-	9103	protein_coding	MDS1 and EVI1 complex locus [Source:HGNC Symbol;Acc:HGNC:3498]	zf-C2H2
ENSG00000143891	9.43349	3.47909	9.8931	4.10426	3.73269	GALM	2	38665910	38741237	+	2790	protein_coding	galactose mutarotase [Source:HGNC Symbol;Acc:HGNC:24063]	-
ENSG00000129474	12.5464	20.4842	9.57563	19.9473	21.087	AJUBA	14	22971174	22982642	-	5979	protein_coding	ajuba LIM protein [Source:HGNC Symbol;Acc:HGNC:20250]	-
ENSG00000132205	9.41866	4.58007	11.3554	5.74271	5.14184	EMILIN2	18	2847030	2915993	+	6435	protein_coding	elastin microfibril interfacer 2 [Source:HGNC Symbol;Acc:HGNC:19881]	-
ENSG00000134954	8.06316	13.6624	12.5378	12.0167	14.6652	ETS1	11	128458761	128587558	-	7149	protein_coding	ETS proto-oncogene 1, transcription factor [Source:HGNC Symbol;Acc:HGNC:3488]	ETS
ENSG00000152952	27.5718	15.269	46.1118	20.3847	19.7772	PLOD2	3	146069440	146163653	-	7646	protein_coding	procollagen-lysine,2-oxoglutarate 5-dioxygenase 2 [Source:HGNC Symbol;Acc:HGNC:9082]	-
ENSG00000126562	1.1802	3.71049	1.71261	3.66146	4.30692	WNK4	17	42780678	42796936	+	5089	protein_coding	WNK lysine deficient protein kinase 4 [Source:HGNC Symbol;Acc:HGNC:14544]	-
ENSG00000111885	8.97174	3.59057	9.9732	3.49198	4.593	MAN1A1	6	119177209	119349761	-	5014	protein_coding	mannosidase alpha class 1A member 1 [Source:HGNC Symbol;Acc:HGNC:6821]	-
ENSG00000114315	7.93836	2.01729	8.11138	3.2541	1.82689	HES1	3	194136145	194138732	+	2062	protein_coding	hes family bHLH transcription factor 1 [Source:HGNC Symbol;Acc:HGNC:5192]	bHLH
ENSG00000168393	11.6617	23.2402	10.2921	31.3355	19.979	DTYMK	2	241675742	241686991	-	2451	protein_coding	deoxythymidylate kinase [Source:HGNC Symbol;Acc:HGNC:3061]	-
ENSG00000203760	2.38979	13.2433	4.0489	16.8165	11.8831	CENPW	6	126340174	126348875	+	795	protein_coding	centromere protein W [Source:HGNC Symbol;Acc:HGNC:21488]	-
ENSG00000118503	2.89717	0.739747	5.75847	1.48252	0.999389	TNFAIP3	6	137867188	137883312	+	5051	protein_coding	TNF alpha induced protein 3 [Source:HGNC Symbol;Acc:HGNC:11896]	-
ENSG00000158246	0.267133	2.7154	0.408438	1.91587	2.17009	TENT5B	1	27005020	27012836	-	2368	protein_coding	terminal nucleotidyltransferase 5B [Source:HGNC Symbol;Acc:HGNC:28273]	-
ENSG00000070814	3.85287	6.97785	3.99398	5.68486	6.5997	TCOF1	5	150357629	150400308	+	11439	protein_coding	treacle ribosome biogenesis factor 1 [Source:HGNC Symbol;Acc:HGNC:11654]	-
ENSG00000170271	3.51465	1.30634	9.57132	1.1782	1.1478	FAXDC2	5	154818491	154859252	-	7222	protein_coding	fatty acid hydroxylase domain containing 2 [Source:HGNC Symbol;Acc:HGNC:1334]	-
ENSG00000112658	15.6363	28.2455	10.4121	27.5437	28.7205	SRF	6	43171299	43181507	+	4202	protein_coding	serum response factor [Source:HGNC Symbol;Acc:HGNC:11291]	SRF
ENSG00000138758	56.0821	85.5793	56.1395	68.9356	88.4729	2023-09-11	4	76949703	77040384	+	9787	protein_coding	septin 11 [Source:HGNC Symbol;Acc:HGNC:25589]	-
ENSG00000187123	0.526179	2.24138	0.368749	1.45634	2.00813	LYPD6	2	149329985	149474148	+	5033	protein_coding	LY6/PLAUR domain containing 6 [Source:HGNC Symbol;Acc:HGNC:28751]	-
ENSG00000112081	19.7199	32.3506	11.226	33.6093	31.1576	SRSF3	6	36594353	36605600	+	7118	protein_coding	serine and arginine rich splicing factor 3 [Source:HGNC Symbol;Acc:HGNC:10785]	-
ENSG00000130826	7.9932	15.0108	5.12728	15.7003	14.5771	DKC1	X	154762742	154777689	+	4203	protein_coding	dyskerin pseudouridine synthase 1 [Source:HGNC Symbol;Acc:HGNC:2890]	-
ENSG00000137573	0.52323	1.76562	1.3425	1.88907	2.16068	SULF1	8	69466624	69660915	+	9404	protein_coding	sulfatase 1 [Source:HGNC Symbol;Acc:HGNC:20391]	-
ENSG00000163947	3.53522	1.30726	3.18551	1.10491	1.45972	ARHGEF3	3	56727418	57079329	-	6594	protein_coding	Rho guanine nucleotide exchange factor 3 [Source:HGNC Symbol;Acc:HGNC:683]	-
ENSG00000162062	1.13703	4.41162	1.22079	5.07233	3.86116	TEDC2	16	2460080	2464963	+	2854	protein_coding	tubulin epsilon and delta complex 2 [Source:HGNC Symbol;Acc:HGNC:25849]	-
ENSG00000109171	10.9473	18.1495	9.93723	15.129	19.4712	SLAIN2	4	48341322	48426212	+	6524	protein_coding	SLAIN motif family member 2 [Source:HGNC Symbol;Acc:HGNC:29282]	-
ENSG00000109674	0.399932	2.7463	0.116451	1.90274	2.15824	NEIL3	4	177309836	177362943	+	2959	protein_coding	nei like DNA glycosylase 3 [Source:HGNC Symbol;Acc:HGNC:24573]	-
ENSG00000176208	0.235764	1.41931	0.271148	0.845833	1.40933	ATAD5	17	30831970	30895869	+	7075	protein_coding	ATPase family, AAA domain containing 5 [Source:HGNC Symbol;Acc:HGNC:25752]	-
ENSG00000173641	16.6027	7.65048	16.3498	17.8145	12.462	HSPB7	1	16014028	16019594	-	3910	protein_coding	heat shock protein family B (small) member 7 [Source:HGNC Symbol;Acc:HGNC:5249]	-
ENSG00000181381	4.61378	2.05251	3.60603	1.87436	2.36667	DDX60L	4	168356735	168537786	-	12156	protein_coding	DExD/H-box 60 like [Source:HGNC Symbol;Acc:HGNC:26429]	-
ENSG00000117152	2.74851	6.39457	3.98967	7.52174	9.7318	RGS4	1	163068775	163076802	+	4836	protein_coding	regulator of G protein signaling 4 [Source:HGNC Symbol;Acc:HGNC:10000]	-
ENSG00000168268	26.0999	45.4442	33.7544	45.5606	44.2501	NT5DC2	3	52524385	52535054	-	4719	protein_coding	5'-nucleotidase domain containing 2 [Source:HGNC Symbol;Acc:HGNC:25717]	-
ENSG00000135677	89.025	56.8929	90.6997	47.6108	62.0818	GNS	12	64713445	64759447	-	6284	protein_coding	glucosamine (N-acetyl)-6-sulfatase [Source:HGNC Symbol;Acc:HGNC:4422]	-
ENSG00000177374	5.51911	10.276	9.24527	10.534	11.1906	HIC1	17	2054154	2063241	+	8108	protein_coding	HIC ZBTB transcriptional repressor 1 [Source:HGNC Symbol;Acc:HGNC:4909]	ZBTB
ENSG00000188921	2.65716	1.03751	2.78802	1.37335	1.32466	HACD4	9	20999515	21031636	-	9152	protein_coding	3-hydroxyacyl-CoA dehydratase 4 [Source:HGNC Symbol;Acc:HGNC:20920]	-
ENSG00000168394	21.9774	12.7815	18.2856	12.1282	12.9446	TAP1	6	32845209	32853978	-	4805	protein_coding	transporter 1, ATP binding cassette subfamily B member [Source:HGNC Symbol;Acc:HGNC:43]	-
ENSG00000081041	4.27555	0.205741	4.84359	0.337356	0.210943	CXCL2	4	74097035	74099293	-	1500	protein_coding	C-X-C motif chemokine ligand 2 [Source:HGNC Symbol;Acc:HGNC:4603]	-
ENSG00000125675	5.65315	10.4705	9.27837	11.2706	10.9294	GRIA3	X	123184153	123490915	+	6484	protein_coding	glutamate ionotropic receptor AMPA type subunit 3 [Source:HGNC Symbol;Acc:HGNC:4573]	-
ENSG00000177628	48.3557	29.3967	56.7419	23.1721	30.1551	GBA	1	155234452	155244699	-	3648	protein_coding	glucosylceramidase beta [Source:HGNC Symbol;Acc:HGNC:4177]	-
ENSG00000239672	4.77152	11.7498	5.21843	16.4433	9.28347	NME1	17	51153536	51162428	+	3438	protein_coding	NME/NM23 nucleoside diphosphate kinase 1 [Source:HGNC Symbol;Acc:HGNC:7849]	-
ENSG00000188807	2.22287	5.14812	1.42307	4.42214	4.46868	TMEM201	1	9588922	9614873	+	6966	protein_coding	transmembrane protein 201 [Source:HGNC Symbol;Acc:HGNC:33719]	-
ENSG00000196220	0.455914	0.0641753	0.80738	0.0805083	0.0945527	SRGAP3	3	8980591	9363053	-	18924	protein_coding	SLIT-ROBO Rho GTPase activating protein 3 [Source:HGNC Symbol;Acc:HGNC:19744]	-
ENSG00000171223	60.6725	24.5364	85.3352	39.8174	26.8875	JUNB	19	12791496	12793315	+	1820	protein_coding	JunB proto-oncogene, AP-1 transcription factor subunit [Source:HGNC Symbol;Acc:HGNC:6205]	TF_bZIP
ENSG00000131724	40.3638	25.0452	39.3495	23.757	26.9125	IL13RA1	X	118727572	118794539	+	4372	protein_coding	interleukin 13 receptor subunit alpha 1 [Source:HGNC Symbol;Acc:HGNC:5974]	-
ENSG00000111057	13.2827	24.8983	23.2194	41.5469	26.5193	KRT18	12	52948871	52952901	+	3218	protein_coding	keratin 18 [Source:HGNC Symbol;Acc:HGNC:6430]	-
ENSG00000187840	27.2897	54.5699	38.9315	84.129	49.4209	EIF4EBP1	8	38030341	38060365	+	1073	protein_coding	eukaryotic translation initiation factor 4E binding protein 1 [Source:HGNC Symbol;Acc:HGNC:3288]	-
ENSG00000131374	11.6348	6.39022	9.9266	6.10033	8.20817	TBC1D5	3	17157162	18444817	-	11269	protein_coding	TBC1 domain family member 5 [Source:HGNC Symbol;Acc:HGNC:19166]	-
ENSG00000150995	0.529811	0.15359	0.675934	0.121108	0.178071	ITPR1	3	4493345	4847840	+	32454	protein_coding	inositol 1,4,5-trisphosphate receptor type 1 [Source:HGNC Symbol;Acc:HGNC:6180]	-
ENSG00000020577	4.02695	7.29649	4.58511	6.81984	7.48219	SAMD4A	14	54567097	54793315	+	12170	protein_coding	sterile alpha motif domain containing 4A [Source:HGNC Symbol;Acc:HGNC:23023]	-
ENSG00000144476	4.8176	0.873166	5.42588	1.82403	1.44958	ACKR3	2	236567787	236582358	+	2258	protein_coding	atypical chemokine receptor 3 [Source:HGNC Symbol;Acc:HGNC:23692]	-
ENSG00000151835	2.55697	6.04147	2.0004	5.0675	6.50903	SACS	13	23328826	23433740	-	15918	protein_coding	sacsin molecular chaperone [Source:HGNC Symbol;Acc:HGNC:10519]	-
ENSG00000176974	1.19219	3.03992	1.08477	1.97653	2.25277	SHMT1	17	18327860	18363563	-	7281	protein_coding	serine hydroxymethyltransferase 1 [Source:HGNC Symbol;Acc:HGNC:10850]	-
ENSG00000128342	1.84977	0.189171	4.43374	0.62548	0.435479	LIF	22	30240447	30246851	-	3969	protein_coding	LIF, interleukin 6 family cytokine [Source:HGNC Symbol;Acc:HGNC:6596]	-
ENSG00000148926	41.895	80.005	60.3621	121.455	82.2568	ADM	11	10304680	10307397	+	2718	protein_coding	adrenomedullin [Source:HGNC Symbol;Acc:HGNC:259]	-
ENSG00000111450	9.91134	18.5103	8.2835	14.3161	16.7167	STX2	12	130789600	130839266	-	3723	protein_coding	syntaxin 2 [Source:HGNC Symbol;Acc:HGNC:3403]	-
ENSG00000178719	191.235	123.41	185.617	133.857	126.166	GRINA	8	143990058	143993415	+	2527	protein_coding	glutamate ionotropic receptor NMDA type subunit associated protein 1 [Source:HGNC Symbol;Acc:HGNC:4589]	-
ENSG00000213347	1.06934	3.20998	1.3332	3.5	2.3219	MXD3	5	177301461	177312757	-	5154	protein_coding	MAX dimerization protein 3 [Source:HGNC Symbol;Acc:HGNC:14008]	bHLH
ENSG00000154473	8.73446	15.002	8.46861	14.3673	14.0736	BUB3	10	123154277	123170467	+	8300	protein_coding	BUB3, mitotic checkpoint protein [Source:HGNC Symbol;Acc:HGNC:1151]	-
ENSG00000148484	30.4881	49.9218	29.6787	42.5666	48.417	RSU1	10	16590611	16817528	-	4191	protein_coding	Ras suppressor protein 1 [Source:HGNC Symbol;Acc:HGNC:10464]	-
ENSG00000100749	1.95324	6.12329	1.43087	4.68617	5.20877	VRK1	14	96797304	96931722	+	2744	protein_coding	vaccinia related kinase 1 [Source:HGNC Symbol;Acc:HGNC:12718]	-
ENSG00000136938	39.4793	64.7816	41.7897	78.5771	58.2508	ANP32B	9	97983361	98015943	+	1850	protein_coding	acidic nuclear phosphoprotein 32 family member B [Source:HGNC Symbol;Acc:HGNC:16677]	-
ENSG00000067064	75.3372	37.8015	26.5126	28.2849	44.7516	IDI1	10	1039152	1049170	-	4345	protein_coding	isopentenyl-diphosphate delta isomerase 1 [Source:HGNC Symbol;Acc:HGNC:5387]	-
ENSG00000138646	1.43386	0.115115	0.877687	0.0726727	0.0697799	HERC5	4	88457117	88506163	+	4766	protein_coding	HECT and RLD domain containing E3 ubiquitin protein ligase 5 [Source:HGNC Symbol;Acc:HGNC:24368]	-
ENSG00000159231	3.81574	12.8258	6.9015	20.4739	10.5539	CBR3	21	36134912	36146566	+	1169	protein_coding	carbonyl reductase 3 [Source:HGNC Symbol;Acc:HGNC:1549]	-
ENSG00000147459	3.22716	6.32757	3.39735	4.72716	6.13	DOCK5	8	25184723	25418082	+	15960	protein_coding	dedicator of cytokinesis 5 [Source:HGNC Symbol;Acc:HGNC:23476]	-
ENSG00000052126	3.77268	1.86534	5.32445	1.73456	1.96756	PLEKHA5	12	19129752	19376400	+	12558	protein_coding	pleckstrin homology domain containing A5 [Source:HGNC Symbol;Acc:HGNC:30036]	-
ENSG00000129534	1.94884	4.68322	2.25289	3.29379	4.77618	MIS18BP1	14	45203190	45253540	-	6250	protein_coding	MIS18 binding protein 1 [Source:HGNC Symbol;Acc:HGNC:20190]	-
ENSG00000173482	13.6235	8.22587	14.4797	8.13162	9.77577	PTPRM	18	7566782	8406861	+	9900	protein_coding	protein tyrosine phosphatase, receptor type M [Source:HGNC Symbol;Acc:HGNC:9675]	-
ENSG00000135622	6.22927	2.91077	4.9541	3.39233	3.05254	SEMA4F	2	74654228	74683853	+	6227	protein_coding	ssemaphorin 4F [Source:HGNC Symbol;Acc:HGNC:10734]	-
ENSG00000111331	2.32187	0.607216	1.81681	0.384472	0.556034	OAS3	12	112938352	112973249	+	8251	protein_coding	2'-5'-oligoadenylate synthetase 3 [Source:HGNC Symbol;Acc:HGNC:8088]	-
ENSG00000006756	5.03075	2.27335	5.49494	2.50418	2.45833	ARSD	X	2903970	2929351	-	7030	protein_coding	arylsulfatase D [Source:HGNC Symbol;Acc:HGNC:717]	-
ENSG00000178295	0.746337	1.96243	0.687651	1.5037	1.89533	GEN1	2	17753858	17788941	+	11827	protein_coding	GEN1, Holliday junction 5' flap endonuclease [Source:HGNC Symbol;Acc:HGNC:26881]	-
ENSG00000130635	73.9715	129.713	131.955	137.883	148.007	COL5A1	9	134641774	134844843	+	11189	protein_coding	collagen type V alpha 1 chain [Source:HGNC Symbol;Acc:HGNC:2209]	-
ENSG00000120526	3.71626	8.26047	3.10586	7.55074	7.95523	NUDCD1	8	109240919	109334385	-	4439	protein_coding	NudC domain containing 1 [Source:HGNC Symbol;Acc:HGNC:24306]	-
ENSG00000167996	2029.36	1309.38	2005.39	1606.13	1424.44	FTH1	11	61959718	61967660	-	2030	protein_coding	ferritin heavy chain 1 [Source:HGNC Symbol;Acc:HGNC:3976]	-
ENSG00000080608	9.3988	18.1612	6.62893	19.082	19.1844	PUM3	9	2720469	2844241	-	2707	protein_coding	pumilio RNA binding family member 3 [Source:HGNC Symbol;Acc:HGNC:29676]	-
ENSG00000149257	88.6329	138.525	105.847	163.137	151.323	SERPINH1	11	75562056	75572783	+	6281	protein_coding	serpin family H member 1 [Source:HGNC Symbol;Acc:HGNC:1546]	-
ENSG00000114126	5.40589	2.81064	6.64304	2.66919	2.74456	TFDP2	3	141944428	142149544	-	11897	protein_coding	transcription factor Dp-2 [Source:HGNC Symbol;Acc:HGNC:11751]	E2F
ENSG00000076706	17.7332	29.5306	23.7463	30.4377	31.3717	MCAM	11	119308529	119321521	-	7422	protein_coding	melanoma cell adhesion molecule [Source:HGNC Symbol;Acc:HGNC:6934]	-
ENSG00000001084	5.88421	2.83499	4.52015	3.6361	3.72945	GCLC	6	53497341	53616970	-	8646	protein_coding	glutamate-cysteine ligase catalytic subunit [Source:HGNC Symbol;Acc:HGNC:4311]	-
ENSG00000239887	2.44246	0.477075	3.4219	0.509733	0.716501	C1orf226	1	162366908	162386818	+	4495	protein_coding	chromosome 1 open reading frame 226 [Source:HGNC Symbol;Acc:HGNC:34351]	-
ENSG00000132824	68.7565	43.1003	64.1618	38.0691	43.916	SERINC3	20	44496221	44522109	-	4683	protein_coding	serine incorporator 3 [Source:HGNC Symbol;Acc:HGNC:11699]	-
ENSG00000185070	5.60189	3.17223	5.92764	2.86146	3.47083	FLRT2	14	85530144	85654426	+	34899	protein_coding	fibronectin leucine rich transmembrane protein 2 [Source:HGNC Symbol;Acc:HGNC:3761]	-
ENSG00000160298	1.26079	3.50654	1.40723	2.4245	2.79948	C21orf58	21	46300181	46323875	-	5315	protein_coding	chromosome 21 open reading frame 58 [Source:HGNC Symbol;Acc:HGNC:1300]	-
ENSG00000159147	3.88656	8.61237	2.93422	8.37689	8.06572	DONSON	21	33559542	33588708	-	3513	protein_coding	downstream neighbor of SON [Source:HGNC Symbol;Acc:HGNC:2993]	-
ENSG00000182704	13.0105	6.77238	17.5191	6.18694	6.81391	TSKU	11	76782251	76798154	+	4131	protein_coding	tsukushi, small leucine rich proteoglycan [Source:HGNC Symbol;Acc:HGNC:28850]	-
ENSG00000163781	3.50091	6.91991	3.10079	4.75558	6.69281	TOPBP1	3	133598175	133662380	-	7304	protein_coding	DNA topoisomerase II binding protein 1 [Source:HGNC Symbol;Acc:HGNC:17008]	-
ENSG00000155755	3.49303	6.7372	3.19046	7.15965	6.89375	TMEM237	2	201620184	201643570	-	7647	protein_coding	transmembrane protein 237 [Source:HGNC Symbol;Acc:HGNC:14432]	-
ENSG00000175745	10.8186	20.0874	27.0619	23.7302	24.7004	NR2F1	5	93583224	93594615	+	4314	protein_coding	nuclear receptor subfamily 2 group F member 1 [Source:HGNC Symbol;Acc:HGNC:7975]	RXR-like
ENSG00000144369	6.48548	2.92198	3.59873	1.92987	2.56363	FAM171B	2	186693971	186765965	+	5826	protein_coding	family with sequence similarity 171 member B [Source:HGNC Symbol;Acc:HGNC:29412]	-
ENSG00000177096	6.21377	15.41	10.7684	18.9159	14.0407	PHETA2	22	42074251	42079441	+	2451	protein_coding	PH domain containing endocytic trafficking adaptor 2 [Source:HGNC Symbol;Acc:HGNC:27161]	-
ENSG00000180304	22.8676	14.2047	23.9176	15.279	14.035	OAZ2	15	64687573	64703281	-	7671	protein_coding	ornithine decarboxylase antizyme 2 [Source:HGNC Symbol;Acc:HGNC:8096]	-
ENSG00000167695	15.1638	27.7075	13.7191	29.6344	27.3675	FAM57A	17	732412	742972	+	2740	protein_coding	family with sequence similarity 57 member A [Source:HGNC Symbol;Acc:HGNC:29646]	-
ENSG00000109572	15.0304	7.97881	11.314	6.37123	8.89119	CLCN3	4	169612633	169723673	+	8123	protein_coding	chloride voltage-gated channel 3 [Source:HGNC Symbol;Acc:HGNC:2021]	-
ENSG00000129810	0.147832	1.50759	0.155456	1.10525	1.24013	SGO1	3	20160593	20186292	-	3828	protein_coding	shugoshin 1 [Source:HGNC Symbol;Acc:HGNC:25088]	-
ENSG00000105676	7.08549	14.216	6.82073	13.7801	13.2419	ARMC6	19	19033575	19060311	+	4052	protein_coding	armadillo repeat containing 6 [Source:HGNC Symbol;Acc:HGNC:25049]	-
ENSG00000067141	14.0278	7.577	16.2836	6.12465	8.23195	NEO1	15	73051710	73305206	+	8117	protein_coding	neogenin 1 [Source:HGNC Symbol;Acc:HGNC:7754]	-
ENSG00000023902	9.70928	17.5891	13.5486	20.5835	16.9207	PLEKHO1	1	150149183	150164720	+	6565	protein_coding	pleckstrin homology domain containing O1 [Source:HGNC Symbol;Acc:HGNC:24310]	-
ENSG00000165124	2.38527	4.49336	5.26804	4.8348	5.49827	SVEP1	9	110365251	110579880	-	14190	protein_coding	sushi, von Willebrand factor type A, EGF and pentraxin domain containing 1 [Source:HGNC Symbol;Acc:HGNC:15985]	-
ENSG00000197746	664.882	438.825	720.133	550.421	457.951	PSAP	10	71816298	71851375	-	3239	protein_coding	prosaposin [Source:HGNC Symbol;Acc:HGNC:9498]	-
ENSG00000184292	3.04432	0.257131	3.79606	0.557162	0.400743	TACSTD2	1	58575423	58577773	-	2351	protein_coding	tumor associated calcium signal transducer 2 [Source:HGNC Symbol;Acc:HGNC:11530]	-
ENSG00000049323	8.95399	4.47457	10.4689	4.63173	5.37365	LTBP1	2	32946972	33399509	+	7329	protein_coding	latent transforming growth factor beta binding protein 1 [Source:HGNC Symbol;Acc:HGNC:6714]	-
ENSG00000172175	3.78271	6.64543	2.66874	6.21905	7.74974	MALT1	18	58671386	58754477	+	11527	protein_coding	MALT1 paracaspase [Source:HGNC Symbol;Acc:HGNC:6819]	-
ENSG00000038210	4.3905	9.6229	3.18269	9.07563	9.46636	PI4K2B	4	25233975	25279092	+	3540	protein_coding	phosphatidylinositol 4-kinase type 2 beta [Source:HGNC Symbol;Acc:HGNC:18215]	-
ENSG00000010322	24.9908	15.7238	32.6914	19.0218	17.9384	NISCH	3	52455118	52493071	+	9161	protein_coding	nischarin [Source:HGNC Symbol;Acc:HGNC:18006]	-
ENSG00000119138	6.83589	2.80237	9.12411	3.04243	3.46524	KLF9	9	70384597	70414624	-	5175	protein_coding	Kruppel like factor 9 [Source:HGNC Symbol;Acc:HGNC:1123]	zf-C2H2
ENSG00000279117	5.75257	1.54621	4.99202	1.76	1.9874	AP001972.5	11	75260129	75262466	-	2338	TEC	TEC	-
ENSG00000118263	2.82049	5.69754	4.05393	5.13172	6.17855	KLF7	2	207074137	207167267	-	9262	protein_coding	Kruppel like factor 7 [Source:HGNC Symbol;Acc:HGNC:6350]	zf-C2H2
ENSG00000117411	23.5889	40.3514	27.6776	40.1094	40.3637	B4GALT2	1	43978943	43991170	+	3772	protein_coding	beta-1,4-galactosyltransferase 2 [Source:HGNC Symbol;Acc:HGNC:925]	-
ENSG00000152818	2.56592	5.43057	3.15886	4.207	5.77726	UTRN	6	144285701	144853034	+	14604	protein_coding	utrophin [Source:HGNC Symbol;Acc:HGNC:12635]	-
ENSG00000099219	6.78652	3.06055	5.18793	2.83112	3.51166	ERMP1	9	5765076	5833117	-	6528	protein_coding	endoplasmic reticulum metallopeptidase 1 [Source:HGNC Symbol;Acc:HGNC:23703]	-
ENSG00000143149	29.9506	17.4306	20.7317	17.194	16.6932	ALDH9A1	1	165662216	165698863	-	3308	protein_coding	aldehyde dehydrogenase 9 family member A1 [Source:HGNC Symbol;Acc:HGNC:412]	-
ENSG00000196155	8.72014	4.58615	10.3623	6.61557	6.13412	PLEKHG4	16	67277510	67289499	+	7328	protein_coding	pleckstrin homology and RhoGEF domain containing G4 [Source:HGNC Symbol;Acc:HGNC:24501]	-
ENSG00000144136	32.2286	47.7499	24.2281	42.9068	52.965	SLC20A1	2	112645857	112663827	+	5577	protein_coding	solute carrier family 20 member 1 [Source:HGNC Symbol;Acc:HGNC:10946]	-
ENSG00000214530	10.7612	4.99528	16.2845	9.0353	4.95109	STARD10	11	72754729	72793681	-	3710	protein_coding	StAR related lipid transfer domain containing 10 [Source:HGNC Symbol;Acc:HGNC:10666]	-
ENSG00000162496	5.37494	1.3648	10.9645	3.9705	2.30624	DHRS3	1	12567910	12617731	-	3036	protein_coding	dehydrogenase/reductase 3 [Source:HGNC Symbol;Acc:HGNC:17693]	-
ENSG00000106460	8.5549	4.61425	5.90019	5.05673	5.49214	TMEM106B	7	12211241	12243367	+	13867	protein_coding	transmembrane protein 106B [Source:HGNC Symbol;Acc:HGNC:22407]	-
ENSG00000113328	66.3242	40.2049	86.9718	44.6162	46.6093	CCNG1	5	163437569	163446151	+	3096	protein_coding	cyclin G1 [Source:HGNC Symbol;Acc:HGNC:1592]	-
ENSG00000119888	2.48459	0.168379	2.58127	0.389432	0.196929	EPCAM	2	47345158	47387601	+	2519	protein_coding	epithelial cell adhesion molecule [Source:HGNC Symbol;Acc:HGNC:11529]	-
ENSG00000092964	30.8613	19.1066	46.9828	19.3321	19.8017	DPYSL2	8	26514022	26658178	+	7305	protein_coding	dihydropyrimidinase like 2 [Source:HGNC Symbol;Acc:HGNC:3014]	-
ENSG00000196159	1.89011	4.1852	2.51046	3.91197	4.39332	FAT4	4	125316399	125492932	+	16439	protein_coding	FAT atypical cadherin 4 [Source:HGNC Symbol;Acc:HGNC:23109]	-
ENSG00000123933	37.234	23.9393	43.1725	29.8117	23.5877	MXD4	4	2247432	2262294	-	7058	protein_coding	MAX dimerization protein 4 [Source:HGNC Symbol;Acc:HGNC:13906]	bHLH
ENSG00000167393	1.8955	4.00764	2.63307	4.31726	3.56853	PPP2R3B	X	333963	386955	-	9015	protein_coding	protein phosphatase 2 regulatory subunit B''beta [Source:HGNC Symbol;Acc:HGNC:13417]	-
ENSG00000109452	2.41968	4.4911	2.40744	3.58628	4.53828	INPP4B	4	142023160	142847432	-	14153	protein_coding	inositol polyphosphate-4-phosphatase type II B [Source:HGNC Symbol;Acc:HGNC:6075]	-
ENSG00000159200	3.71377	7.22993	2.87646	7.24371	7.70724	RCAN1	21	34513142	34615142	-	6990	protein_coding	regulator of calcineurin 1 [Source:HGNC Symbol;Acc:HGNC:3040]	-
ENSG00000124391	10.6661	0.0468423	13.818	0.045249	0.0257093	IL17C	16	88638591	88640473	+	1379	protein_coding	interleukin 17C [Source:HGNC Symbol;Acc:HGNC:5983]	-
ENSG00000116062	5.23996	8.71873	4.54958	7.48558	7.95112	MSH6	2	47695530	47810101	+	10993	protein_coding	mutS homolog 6 [Source:HGNC Symbol;Acc:HGNC:7329]	-
ENSG00000116044	23.9524	14.3898	25.3915	16.8894	16.2805	NFE2L2	2	177227595	177392697	-	5979	protein_coding	nuclear factor, erythroid 2 like 2 [Source:HGNC Symbol;Acc:HGNC:7782]	TF_bZIP
ENSG00000071553	64.3168	39.5568	62.5178	40.8235	38.2263	ATP6AP1	X	154428632	154436516	+	4884	protein_coding	ATPase H+ transporting accessory protein 1 [Source:HGNC Symbol;Acc:HGNC:868]	-
ENSG00000141458	31.1105	20.0101	27.3743	14.0348	20.1428	NPC1	18	23506184	23586898	-	10102	protein_coding	NPC intracellular cholesterol transporter 1 [Source:HGNC Symbol;Acc:HGNC:7897]	-
ENSG00000171067	16.734	30.7618	13.6846	29.5413	31.1082	C11orf24	11	68261335	68272001	-	3406	protein_coding	chromosome 11 open reading frame 24 [Source:HGNC Symbol;Acc:HGNC:1174]	-
ENSG00000180596	11.5384	1.62032	3.11982	0.776106	0.917181	HIST1H2BC	6	26114873	26123926	-	834	protein_coding	histone cluster 1 H2B family member c [Source:HGNC Symbol;Acc:HGNC:4757]	-
ENSG00000240990	8.65173	3.22273	9.74745	6.19126	4.43708	HOXA11-AS	7	27184507	27189298	+	3128	antisense	HOXA11 antisense RNA [Source:HGNC Symbol;Acc:HGNC:24957]	-
ENSG00000206503	56.4501	95.6018	75.8302	148.973	90.1545	HLA-A	6	29941260	29945884	+	2710	protein_coding	major histocompatibility complex, class I, A [Source:HGNC Symbol;Acc:HGNC:4931]	-
ENSG00000138166	3.77878	9.83455	4.33194	9.05523	11.1433	DUSP5	10	110497838	110511544	+	2615	protein_coding	dual specificity phosphatase 5 [Source:HGNC Symbol;Acc:HGNC:3071]	-
ENSG00000129625	45.9573	29.4435	33.8478	36.6832	29.4605	REEP5	5	112876379	112922539	-	4230	protein_coding	receptor accessory protein 5 [Source:HGNC Symbol;Acc:HGNC:30077]	-
ENSG00000161010	7.59624	3.63007	6.79655	3.50891	3.36053	MRNIP	5	179835133	179862173	-	8496	protein_coding	MRN complex interacting protein [Source:HGNC Symbol;Acc:HGNC:30817]	-
ENSG00000090863	29.2536	19.0439	32.48	16.493	19.8139	GLG1	16	74447427	74607144	-	14111	protein_coding	golgi glycoprotein 1 [Source:HGNC Symbol;Acc:HGNC:4316]	-
ENSG00000173209	6.31513	3.38423	7.52056	4.72277	3.63856	AHSA2P	2	61177418	61191203	+	9083	transcribed_unitary_pseudogene	activator of HSP90 ATPase homolog 2, pseudogene [Source:HGNC Symbol;Acc:HGNC:20437]	-
ENSG00000164932	27.698	54.32	64.8578	78.9264	59.0356	CTHRC1	8	103371515	103382997	+	1776	protein_coding	collagen triple helix repeat containing 1 [Source:HGNC Symbol;Acc:HGNC:18831]	-
ENSG00000115091	33.583	49.3228	22.7202	49.6377	49.451	ACTR3	2	113889960	113962596	+	12049	protein_coding	ARP3 actin related protein 3 homolog [Source:HGNC Symbol;Acc:HGNC:170]	-
ENSG00000160058	21.0478	12.5718	19.5049	11.7115	12.8621	BSDC1	1	32365103	32394731	-	6271	protein_coding	BSD domain containing 1 [Source:HGNC Symbol;Acc:HGNC:25501]	-
ENSG00000162755	5.52105	1.16916	3.75331	2.09886	1.46766	KLHDC9	1	161098361	161100346	+	1720	protein_coding	kelch domain containing 9 [Source:HGNC Symbol;Acc:HGNC:28489]	-
ENSG00000117461	6.12956	2.56093	3.71766	2.61092	2.96139	PIK3R3	1	46040140	46133036	-	7410	protein_coding	phosphoinositide-3-kinase regulatory subunit 3 [Source:HGNC Symbol;Acc:HGNC:8981]	-
ENSG00000138764	11.8361	5.62815	19.4338	5.90529	5.39597	CCNG2	4	77157151	77433388	+	7471	protein_coding	cyclin G2 [Source:HGNC Symbol;Acc:HGNC:1593]	-
ENSG00000188352	9.3126	5.44972	8.23175	5.35422	6.52215	FOCAD	9	20658309	20995955	+	10036	protein_coding	focadhesin [Source:HGNC Symbol;Acc:HGNC:23377]	-
ENSG00000211445	4.38715	1.17821	3.47252	1.72217	1.37995	GPX3	5	151020438	151028993	+	3163	protein_coding	glutathione peroxidase 3 [Source:HGNC Symbol;Acc:HGNC:4555]	-
ENSG00000115183	5.20574	2.77083	6.0993	2.45519	2.96828	TANC1	2	158968671	159232659	+	14884	protein_coding	tetratricopeptide repeat, ankyrin repeat and coiled-coil containing 1 [Source:HGNC Symbol;Acc:HGNC:29364]	-
ENSG00000005249	6.43613	2.73921	4.14851	2.3606	2.73764	PRKAR2B	7	107044649	107161811	+	4318	protein_coding	protein kinase cAMP-dependent type II regulatory subunit beta [Source:HGNC Symbol;Acc:HGNC:9392]	-
ENSG00000102901	8.13117	15.2834	8.61731	17.7456	14.4856	CENPT	16	67828157	67847811	-	5539	protein_coding	centromere protein T [Source:HGNC Symbol;Acc:HGNC:25787]	-
ENSG00000005073	31.2061	16.4362	34.6539	28.4659	19.0315	HOXA11	7	27181510	27185223	-	2307	protein_coding	homeobox A11 [Source:HGNC Symbol;Acc:HGNC:5101]	Homeobox
ENSG00000137501	1.27531	0.385988	1.58079	0.59574	0.513732	SYTL2	11	85694224	85811159	-	11258	protein_coding	synaptotagmin like 2 [Source:HGNC Symbol;Acc:HGNC:15585]	-
ENSG00000100612	30.0895	17.136	24.24	20.7639	17.4004	DHRS7	14	60144120	60169856	-	3248	protein_coding	dehydrogenase/reductase 7 [Source:HGNC Symbol;Acc:HGNC:21524]	-
ENSG00000133639	19.2086	9.71388	38.5435	11.6625	11.2416	BTG1	12	92140278	92145897	-	4854	protein_coding	BTG anti-proliferation factor 1 [Source:HGNC Symbol;Acc:HGNC:1130]	-
ENSG00000168066	23.1218	36.542	24.5555	33.3103	36.9125	SF1	11	64764606	64778786	-	5972	protein_coding	splicing factor 1 [Source:HGNC Symbol;Acc:HGNC:12950]	-
ENSG00000148362	9.78373	21.7961	10.8915	30.3181	18.2695	PAXX	9	136992418	136993984	+	1367	protein_coding	PAXX, non-homologous end joining factor [Source:HGNC Symbol;Acc:HGNC:27849]	-
ENSG00000166396	14.7033	25.3647	18.678	28.7605	31.4297	SERPINB7	18	63752935	63805376	+	2637	protein_coding	serpin family B member 7 [Source:HGNC Symbol;Acc:HGNC:13902]	-
ENSG00000198074	3.92195	0.404565	4.69966	1.43291	1.11263	AKR1B10	7	134527592	134541408	+	1744	protein_coding	aldo-keto reductase family 1 member B10 [Source:HGNC Symbol;Acc:HGNC:382]	-
ENSG00000198728	59.53	37.3997	87.6146	35.0515	35.6771	LDB1	10	102107560	102120453	-	2790	protein_coding	LIM domain binding 1 [Source:HGNC Symbol;Acc:HGNC:6532]	-
ENSG00000167693	23.1263	35.7883	26.168	35.6782	34.7371	NXN	17	799313	979770	-	5880	protein_coding	nucleoredoxin [Source:HGNC Symbol;Acc:HGNC:18008]	-
ENSG00000177706	41.8873	24.0536	50.4589	38.8162	28.1088	FAM20C	7	192969	260745	+	4629	protein_coding	FAM20C, golgi associated secretory pathway kinase [Source:HGNC Symbol;Acc:HGNC:22140]	-
ENSG00000149451	36.8044	58.5606	62.435	60.9021	56.7857	ADAM33	20	3667965	3682246	-	5834	protein_coding	ADAM metallopeptidase domain 33 [Source:HGNC Symbol;Acc:HGNC:15478]	-
ENSG00000101347	4.63158	2.41121	3.17454	2.30087	2.54533	SAMHD1	20	36889773	36951901	-	11261	protein_coding	SAM and HD domain containing deoxynucleoside triphosphate triphosphohydrolase 1 [Source:HGNC Symbol;Acc:HGNC:15925]	-
ENSG00000169504	112.865	166.29	114.295	143.718	179.086	CLIC4	1	24745357	24844324	+	4495	protein_coding	chloride intracellular channel 4 [Source:HGNC Symbol;Acc:HGNC:13518]	-
ENSG00000110852	2.80978	7.23963	4.95467	5.93267	4.96066	CLEC2B	12	9852984	9870136	-	2638	protein_coding	C-type lectin domain family 2 member B [Source:HGNC Symbol;Acc:HGNC:2053]	-
ENSG00000058262	223.435	154.03	215.984	156.762	165.433	SEC61A1	3	128051641	128071683	+	4697	protein_coding	Sec61 translocon alpha 1 subunit [Source:HGNC Symbol;Acc:HGNC:18276]	-
ENSG00000115875	14.3998	24.2281	8.86502	25.7802	22.1716	SRSF7	2	38743599	38751494	-	4045	protein_coding	serine and arginine rich splicing factor 7 [Source:HGNC Symbol;Acc:HGNC:10789]	-
ENSG00000153044	1.53446	5.53826	1.7861	5.12913	4.53953	CENPH	5	69189548	69210357	+	2244	protein_coding	centromere protein H [Source:HGNC Symbol;Acc:HGNC:17268]	-
ENSG00000121904	0.983457	2.04613	1.25012	1.41044	2.02403	CSMD2	1	33513999	34165842	-	18157	protein_coding	CUB and Sushi multiple domains 2 [Source:HGNC Symbol;Acc:HGNC:19290]	-
ENSG00000166845	0.661545	2.28736	0.590514	1.48716	1.94155	C18orf54	18	54357917	54385218	+	6165	protein_coding	chromosome 18 open reading frame 54 [Source:HGNC Symbol;Acc:HGNC:13796]	-
ENSG00000132274	19.4123	11.801	24.0154	11.7289	12.6604	TRIM22	11	5689689	5737089	+	6020	protein_coding	tripartite motif containing 22 [Source:HGNC Symbol;Acc:HGNC:16379]	-
ENSG00000163466	39.5992	64.0491	42.6046	60.0258	62.3622	ARPC2	2	218217094	218254356	+	6562	protein_coding	actin related protein 2/3 complex subunit 2 [Source:HGNC Symbol;Acc:HGNC:705]	-
ENSG00000177917	5.03934	10.4901	5.34118	10.3966	9.86457	ARL6IP6	2	152717893	152761253	+	3349	protein_coding	ADP ribosylation factor like GTPase 6 interacting protein 6 [Source:HGNC Symbol;Acc:HGNC:24048]	-
ENSG00000185652	1.07328	4.06191	1.38054	3.93546	3.63926	NTF3	12	5432112	5521536	+	2919	protein_coding	neurotrophin 3 [Source:HGNC Symbol;Acc:HGNC:8023]	-
ENSG00000212724	0.151798	6.08597	0.0456606	7.21863	8.53411	KRTAP2-3	17	41059240	41060114	-	875	protein_coding	keratin associated protein 2-3 [Source:HGNC Symbol;Acc:HGNC:18906]	-
ENSG00000168003	48.9497	30.6841	37.2218	52.7341	44.3056	SLC3A2	11	62856102	62888875	+	5178	protein_coding	solute carrier family 3 member 2 [Source:HGNC Symbol;Acc:HGNC:11026]	-
ENSG00000103642	15.012	25.0838	11.8924	28.4535	25.7936	LACTB	15	63121800	63142061	+	3972	protein_coding	lactamase beta [Source:HGNC Symbol;Acc:HGNC:16468]	-
ENSG00000171608	3.5929	7.03975	5.57432	5.3909	5.86679	PIK3CD	1	9651732	9729114	+	6332	protein_coding	phosphatidylinositol-4,5-bisphosphate 3-kinase catalytic subunit delta [Source:HGNC Symbol;Acc:HGNC:8977]	-
ENSG00000164930	14.3001	23.5644	10.8841	23.4881	26.3698	FZD6	8	103298433	103332866	+	4065	protein_coding	frizzled class receptor 6 [Source:HGNC Symbol;Acc:HGNC:4044]	-
ENSG00000105835	15.3643	9.58697	19.4565	10.5129	10.7403	NAMPT	7	106248285	106286326	-	9049	protein_coding	nicotinamide phosphoribosyltransferase [Source:HGNC Symbol;Acc:HGNC:30092]	-
ENSG00000183287	0.927432	2.49166	0.986183	2.57557	2.98613	CCBE1	18	59430939	59697662	-	6753	protein_coding	collagen and calcium binding EGF domains 1 [Source:HGNC Symbol;Acc:HGNC:29426]	-
ENSG00000135111	115.352	76.0437	190.96	82.5753	88.7336	TBX3	12	114670254	114684164	-	5950	protein_coding	T-box 3 [Source:HGNC Symbol;Acc:HGNC:11602]	T-box
ENSG00000159055	2.96515	8.90513	2.77838	7.15604	7.63555	MIS18A	21	32268219	32279069	-	1723	protein_coding	MIS18 kinetochore protein A [Source:HGNC Symbol;Acc:HGNC:1286]	-
ENSG00000179041	13.1017	27.4307	9.85238	26.5663	25.087	RRS1	8	66429028	66430733	+	1706	protein_coding	ribosome biogenesis regulator homolog [Source:HGNC Symbol;Acc:HGNC:17083]	-
ENSG00000148218	15.2291	8.43237	13.668	7.92197	8.56464	ALAD	9	113386317	113401333	-	4983	protein_coding	aminolevulinate dehydratase [Source:HGNC Symbol;Acc:HGNC:395]	-
ENSG00000134569	4.22443	2.02444	7.24297	2.27768	2.3142	LRP4	11	46856868	46918642	-	8597	protein_coding	LDL receptor related protein 4 [Source:HGNC Symbol;Acc:HGNC:6696]	-
ENSG00000204899	6.58181	14.0451	4.39412	12.9749	12.7949	MZT1	13	72708357	72727687	-	2299	protein_coding	mitotic spindle organizing protein 1 [Source:HGNC Symbol;Acc:HGNC:33830]	-
ENSG00000172009	8.57837	14.5508	7.20539	15.6749	12.9967	THOP1	19	2785460	2815807	+	7464	protein_coding	thimet oligopeptidase 1 [Source:HGNC Symbol;Acc:HGNC:11793]	-
ENSG00000196460	2.42336	6.64968	3.57497	5.20909	5.53573	RFX8	2	101397361	101474703	-	2854	protein_coding	RFX family member 8, lacking RFX DNA binding domain [Source:HGNC Symbol;Acc:HGNC:37253]	RFX
ENSG00000148842	2.2494	1.07373	2.33683	0.840014	1.01713	CNNM2	10	102918293	103090221	+	16324	protein_coding	cyclin and CBS domain divalent metal cation transport mediator 2 [Source:HGNC Symbol;Acc:HGNC:103]	-
ENSG00000122566	41.7661	60.085	35.5078	56.8375	55.9031	HNRNPA2B1	7	26173057	26201529	-	9267	protein_coding	heterogeneous nuclear ribonucleoprotein A2/B1 [Source:HGNC Symbol;Acc:HGNC:5033]	-
ENSG00000145604	5.23244	10.5834	3.47947	9.18306	9.30742	SKP2	5	36151989	36184319	+	3837	protein_coding	S-phase kinase associated protein 2 [Source:HGNC Symbol;Acc:HGNC:10901]	-
ENSG00000088756	0.92999	0.193207	1.07591	0.23544	0.258621	ARHGAP28	18	6729718	6915716	+	11910	protein_coding	Rho GTPase activating protein 28 [Source:HGNC Symbol;Acc:HGNC:25509]	-
ENSG00000197081	49.3817	26.1803	45.3048	20.3653	28.5469	IGF2R	6	159969099	160113507	+	17843	protein_coding	insulin like growth factor 2 receptor [Source:HGNC Symbol;Acc:HGNC:5467]	-
ENSG00000125037	20.4283	11.831	16.422	12.6124	11.2332	EMC3	3	9962537	10011116	-	4270	protein_coding	ER membrane protein complex subunit 3 [Source:HGNC Symbol;Acc:HGNC:23999]	-
ENSG00000166145	1.55096	0.0696724	1.7812	0.164004	0.0661121	SPINT1	15	40844018	40858207	+	3542	protein_coding	serine peptidase inhibitor, Kunitz type 1 [Source:HGNC Symbol;Acc:HGNC:11246]	-
ENSG00000101986	15.3438	8.15506	11.9743	9.1924	9.0866	ABCD1	X	153724868	153744762	+	4233	protein_coding	ATP binding cassette subfamily D member 1 [Source:HGNC Symbol;Acc:HGNC:61]	-
ENSG00000117308	3.50355	7.67364	4.49243	8.0745	7.21755	GALE	1	23795599	23800804	-	3978	protein_coding	UDP-galactose-4-epimerase [Source:HGNC Symbol;Acc:HGNC:4116]	-
ENSG00000158467	5.37428	2.53687	4.08944	2.15931	2.77463	AHCYL2	7	129225023	129430211	+	6858	protein_coding	adenosylhomocysteinase like 2 [Source:HGNC Symbol;Acc:HGNC:22204]	-
ENSG00000106868	7.70523	3.57759	7.90671	3.59198	4.46649	SUSD1	9	112040785	112175408	-	4183	protein_coding	sushi domain containing 1 [Source:HGNC Symbol;Acc:HGNC:25413]	-
ENSG00000189403	20.0016	31.1785	21.0855	31.2038	29.5373	HMGB1	13	30456704	30617597	-	7723	protein_coding	high mobility group box 1 [Source:HGNC Symbol;Acc:HGNC:4983]	HMG
ENSG00000101773	2.37594	5.39481	1.53203	4.08026	5.27875	RBBP8	18	22798261	23026488	+	5091	protein_coding	RB binding protein 8, endonuclease [Source:HGNC Symbol;Acc:HGNC:9891]	-
ENSG00000071626	11.4697	17.5461	11.4138	16.5838	16.7087	DAZAP1	19	1407569	1435687	+	9201	protein_coding	DAZ associated protein 1 [Source:HGNC Symbol;Acc:HGNC:2683]	-
ENSG00000126803	8.90274	16.558	14.098	18.646	17.7985	HSPA2	14	64535905	64546173	+	5777	protein_coding	heat shock protein family A (Hsp70) member 2 [Source:HGNC Symbol;Acc:HGNC:5235]	-
ENSG00000165072	8.3962	3.82829	14.8795	4.45888	4.87621	MAMDC2	9	70043581	70226970	+	3854	protein_coding	MAM domain containing 2 [Source:HGNC Symbol;Acc:HGNC:23673]	-
ENSG00000204767	2.33799	6.15258	4.18762	4.7648	7.62567	INSYN2B	5	169864264	169980740	-	2999	protein_coding	inhibitory synaptic factor family member 2B [Source:HGNC Symbol;Acc:HGNC:37271]	-
ENSG00000141279	15.3749	9.72695	18.1405	8.7434	10.2009	NPEPPS	17	47522942	47623276	+	11514	protein_coding	aminopeptidase puromycin sensitive [Source:HGNC Symbol;Acc:HGNC:7900]	-
ENSG00000113578	0.366412	1.66896	0.368724	2.2756	2.0679	FGF1	5	142592178	142698070	-	5275	protein_coding	fibroblast growth factor 1 [Source:HGNC Symbol;Acc:HGNC:3665]	-
ENSG00000162433	1.00729	0.0129126	4.21981	0.48305	0.164439	AK4	1	65147549	65232145	+	7578	protein_coding	adenylate kinase 4 [Source:HGNC Symbol;Acc:HGNC:363]	-
ENSG00000133789	8.99576	14.8067	9.25973	11.4163	13.8766	SWAP70	11	9664077	9752991	+	7190	protein_coding	switching B cell complex subunit SWAP70 [Source:HGNC Symbol;Acc:HGNC:17070]	-
ENSG00000122591	4.0705	7.19485	2.53291	6.13827	7.70768	FAM126A	7	22889371	23014130	-	14499	protein_coding	family with sequence similarity 126 member A [Source:HGNC Symbol;Acc:HGNC:24587]	-
ENSG00000198648	5.02348	9.51552	3.1527	8.47552	9.14744	STK39	2	167954020	168248141	-	4247	protein_coding	serine/threonine kinase 39 [Source:HGNC Symbol;Acc:HGNC:17717]	-
ENSG00000166734	29.5651	18.0326	24.7142	18.6385	20.5836	CASC4	15	44288729	44415758	+	7095	protein_coding	cancer susceptibility 4 [Source:HGNC Symbol;Acc:HGNC:24892]	-
ENSG00000139644	155.727	107.654	147.412	117.751	112.809	TMBIM6	12	49707725	49764934	+	6186	protein_coding	transmembrane BAX inhibitor motif containing 6 [Source:HGNC Symbol;Acc:HGNC:11723]	-
ENSG00000134697	6.96567	11.9688	5.59988	10.6803	11.556	GNL2	1	37566816	37595935	-	5745	protein_coding	G protein nucleolar 2 [Source:HGNC Symbol;Acc:HGNC:29925]	-
ENSG00000136235	204.263	139.41	234.74	133.101	146.478	GPNMB	7	23235967	23275108	+	6040	protein_coding	glycoprotein nmb [Source:HGNC Symbol;Acc:HGNC:4462]	-
ENSG00000117748	10.1142	19.8236	8.66534	17.0736	15.2217	RPA2	1	27891524	27914746	-	2019	protein_coding	replication protein A2 [Source:HGNC Symbol;Acc:HGNC:10290]	-
ENSG00000270069	1.76266	5.53214	2.19652	6.97856	5.45427	MIR222HG	X	45745211	45770274	-	2785	lincRNA	MIR222 host gene [Source:HGNC Symbol;Acc:HGNC:49555]	-
ENSG00000058085	1.17725	0.187868	1.10362	0.223554	0.177677	LAMC2	1	183186238	183244900	+	6543	protein_coding	laminin subunit gamma 2 [Source:HGNC Symbol;Acc:HGNC:6493]	-
ENSG00000143321	49.1344	76.8274	66.7053	77.8368	68.5164	HDGF	1	156742107	156766925	-	3745	protein_coding	heparin binding growth factor [Source:HGNC Symbol;Acc:HGNC:4856]	-
ENSG00000108406	11.7978	6.63731	12.8434	5.79006	6.73694	DHX40	17	59565525	59608345	+	5939	protein_coding	DEAH-box helicase 40 [Source:HGNC Symbol;Acc:HGNC:18018]	-
ENSG00000183691	5.20622	13.3571	10.0332	11.3014	10.7426	NOG	17	56593699	56595590	+	1892	protein_coding	noggin [Source:HGNC Symbol;Acc:HGNC:7866]	-
ENSG00000177602	0.560505	2.91619	0.30814	1.59317	2.80617	HASPIN	17	3723903	3726699	+	2797	protein_coding	histone H3 associated protein kinase [Source:HGNC Symbol;Acc:HGNC:19682]	-
ENSG00000186469	3.18918	1.09976	4.95275	1.47146	1.3006	GNG2	14	51826195	51979342	+	6379	protein_coding	G protein subunit gamma 2 [Source:HGNC Symbol;Acc:HGNC:4404]	-
ENSG00000149577	13.3581	8.13894	12.7771	8.69201	8.51482	SIDT2	11	117178733	117197445	+	9061	protein_coding	SID1 transmembrane family member 2 [Source:HGNC Symbol;Acc:HGNC:24272]	-
ENSG00000178685	10.8785	5.93676	14.4176	10.302	6.37805	PARP10	8	143977153	144012772	-	6033	protein_coding	poly(ADP-ribose) polymerase family member 10 [Source:HGNC Symbol;Acc:HGNC:25895]	-
ENSG00000167088	5.14064	9.62462	3.75711	12.3272	8.38332	SNRPD1	18	21612267	21633524	+	4909	protein_coding	small nuclear ribonucleoprotein D1 polypeptide [Source:HGNC Symbol;Acc:HGNC:11158]	-
ENSG00000171914	2.30958	4.49369	2.43159	3.71587	4.55252	TLN2	15	62390526	62844631	+	16209	protein_coding	talin 2 [Source:HGNC Symbol;Acc:HGNC:15447]	-
ENSG00000204394	26.7586	41.4965	26.4097	44.2072	41.8579	VARS	6	31777518	31795953	-	6081	protein_coding	valyl-tRNA synthetase [Source:HGNC Symbol;Acc:HGNC:12651]	-
ENSG00000111145	20.5484	31.1836	18.8482	27.0055	33.9775	ELK3	12	96194382	96269835	+	4648	protein_coding	ELK3, ETS transcription factor [Source:HGNC Symbol;Acc:HGNC:3325]	ETS
ENSG00000130720	17.429	30.0963	23.5978	32.1395	29.8849	FIBCD1	9	130902438	130939286	-	3831	protein_coding	fibrinogen C domain containing 1 [Source:HGNC Symbol;Acc:HGNC:25922]	-
ENSG00000189320	0.884044	3.67245	1.36574	2.19166	2.84566	FAM180A	7	135728348	135748846	-	2526	protein_coding	family with sequence similarity 180 member A [Source:HGNC Symbol;Acc:HGNC:33773]	-
ENSG00000109323	5.99024	3.4475	6.90568	3.36921	3.3636	MANBA	4	102630770	102760994	-	11743	protein_coding	mannosidase beta [Source:HGNC Symbol;Acc:HGNC:6831]	-
ENSG00000136928	0.21391	1.01557	0.208589	0.661013	0.857472	GABBR2	9	98288082	98709197	-	7632	protein_coding	gamma-aminobutyric acid type B receptor subunit 2 [Source:HGNC Symbol;Acc:HGNC:4507]	-
ENSG00000171724	7.12293	2.8449	12.5996	3.28075	3.60203	VAT1L	16	77788530	77980107	+	4137	protein_coding	vesicle amine transport 1 like [Source:HGNC Symbol;Acc:HGNC:29315]	-
ENSG00000140939	18.1274	7.95577	29.5393	14.8772	8.68191	NOL3	16	67170154	67175735	+	2992	protein_coding	nucleolar protein 3 [Source:HGNC Symbol;Acc:HGNC:7869]	-
ENSG00000224596	2.60057	0.705873	3.39716	1.05302	0.956923	ZMIZ1-AS1	10	78943328	79067895	-	4427	antisense	ZMIZ1 antisense RNA 1 [Source:HGNC Symbol;Acc:HGNC:27433]	-
ENSG00000002746	3.81049	1.87115	3.84446	1.81152	2.26456	HECW1	7	43112599	43566001	+	13965	protein_coding	HECT, C2 and WW domain containing E3 ubiquitin protein ligase 1 [Source:HGNC Symbol;Acc:HGNC:22195]	-
ENSG00000107643	2.52686	4.81568	2.54555	3.95122	4.5815	MAPK8	10	48306639	48439360	+	9674	protein_coding	mitogen-activated protein kinase 8 [Source:HGNC Symbol;Acc:HGNC:6881]	-
ENSG00000181544	0.157626	1.57103	0.214873	1.35904	1.87653	FANCB	X	14835961	14873069	-	3593	protein_coding	FA complementation group B [Source:HGNC Symbol;Acc:HGNC:3583]	-
ENSG00000133943	6.87849	3.36175	8.94728	3.40292	3.51209	DGLUCY	14	91060333	91225632	+	7212	protein_coding	D-glutamate cyclase [Source:HGNC Symbol;Acc:HGNC:20498]	-
ENSG00000128309	5.74044	9.98137	6.91258	11.8439	9.60675	MPST	22	37019635	37029822	+	6760	protein_coding	mercaptopyruvate sulfurtransferase [Source:HGNC Symbol;Acc:HGNC:7223]	-
ENSG00000134324	13.4445	6.91954	7.40358	4.37597	7.36281	LPIN1	2	11677595	11827409	+	11861	protein_coding	lipin 1 [Source:HGNC Symbol;Acc:HGNC:13345]	-
ENSG00000164543	8.54851	14.0796	6.45609	16.6338	14.7229	STK17A	7	43582758	43650713	+	5099	protein_coding	serine/threonine kinase 17a [Source:HGNC Symbol;Acc:HGNC:11395]	-
ENSG00000256043	11.4319	5.33467	12.9672	5.07072	6.20462	CTSO	4	155924118	155953917	-	2954	protein_coding	cathepsin O [Source:HGNC Symbol;Acc:HGNC:2542]	-
ENSG00000087253	12.9614	7.84476	12.6131	8.08125	8.30278	LPCAT2	16	55508998	55586670	+	7439	protein_coding	lysophosphatidylcholine acyltransferase 2 [Source:HGNC Symbol;Acc:HGNC:26032]	-
ENSG00000154040	3.69446	1.09918	3.89423	1.41464	1.54332	CABYR	18	24138956	24161603	+	3518	protein_coding	calcium binding tyrosine phosphorylation regulated [Source:HGNC Symbol;Acc:HGNC:15569]	-
ENSG00000155016	6.6992	3.24414	3.76037	3.13517	3.6592	CYP2U1	4	107931369	107953457	+	6096	protein_coding	cytochrome P450 family 2 subfamily U member 1 [Source:HGNC Symbol;Acc:HGNC:20582]	-
ENSG00000260916	4.14283	2.05211	3.93311	2.47629	2.1805	CCPG1	15	55340032	55408510	-	8790	protein_coding	cell cycle progression 1 [Source:HGNC Symbol;Acc:HGNC:24227]	-
ENSG00000171791	0.115935	0.629288	0.0858612	0.339905	0.543563	BCL2	18	63123346	63320128	-	11765	protein_coding	BCL2, apoptosis regulator [Source:HGNC Symbol;Acc:HGNC:990]	-
ENSG00000171603	67.2233	44.5051	70.7708	41.4388	46.8616	CLSTN1	1	9729026	9824526	-	5683	protein_coding	calsyntenin 1 [Source:HGNC Symbol;Acc:HGNC:17447]	-
ENSG00000105137	27.8084	45.376	30.0444	41.4134	43.4837	SYDE1	19	15107403	15114988	+	3965	protein_coding	synapse defective Rho GTPase homolog 1 [Source:HGNC Symbol;Acc:HGNC:25824]	-
ENSG00000136161	5.92198	2.40253	3.39598	2.91282	2.2258	RCBTB2	13	48488959	48533256	-	3545	protein_coding	RCC1 and BTB domain containing protein 2 [Source:HGNC Symbol;Acc:HGNC:1914]	-
ENSG00000179431	17.1171	33.9984	13.9186	32.9886	32.1707	FJX1	11	35618419	35620868	+	2450	protein_coding	four jointed box 1 [Source:HGNC Symbol;Acc:HGNC:17166]	-
ENSG00000161642	9.80133	4.31733	21.5126	3.95708	4.19362	ZNF385A	12	54369133	54391298	-	3179	protein_coding	zinc finger protein 385A [Source:HGNC Symbol;Acc:HGNC:17521]	-
ENSG00000108639	15.4609	8.45355	13.0661	13.6596	9.5408	SYNGR2	17	78168558	78173527	+	4074	protein_coding	synaptogyrin 2 [Source:HGNC Symbol;Acc:HGNC:11499]	-
ENSG00000100100	11.2768	5.68555	18.7806	5.05315	4.79451	PIK3IP1	22	31281593	31292534	-	3805	protein_coding	phosphoinositide-3-kinase interacting protein 1 [Source:HGNC Symbol;Acc:HGNC:24942]	-
ENSG00000136997	11.7957	24.2129	17.2754	26.2445	28.2919	MYC	8	127735434	127741434	+	3001	protein_coding	MYC proto-oncogene, bHLH transcription factor [Source:HGNC Symbol;Acc:HGNC:7553]	bHLH
ENSG00000198695	3052.22	1928.06	2713.37	2389.86	2062.4	MT-ND6	MT	14149	14673	-	525	protein_coding	mitochondrially encoded NADH:ubiquinone oxidoreductase core subunit 6 [Source:HGNC Symbol;Acc:HGNC:7462]	-
ENSG00000157637	40.3707	25.7702	36.4267	32.2316	28.256	SLC38A10	17	81245000	81295547	-	7716	protein_coding	solute carrier family 38 member 10 [Source:HGNC Symbol;Acc:HGNC:28237]	-
ENSG00000111371	7.66348	11.9867	6.85983	9.19889	10.9877	SLC38A1	12	46183063	46270017	-	10015	protein_coding	solute carrier family 38 member 1 [Source:HGNC Symbol;Acc:HGNC:13447]	-
ENSG00000156265	1.59033	4.39915	3.19628	3.65225	3.62616	MAP3K7CL	21	29077471	29175889	+	4497	protein_coding	MAP3K7 C-terminal like [Source:HGNC Symbol;Acc:HGNC:16457]	-
ENSG00000093167	5.92641	9.91635	5.12403	9.15135	9.34871	LRRFIP2	3	37052656	37183689	-	10644	protein_coding	LRR binding FLII interacting protein 2 [Source:HGNC Symbol;Acc:HGNC:6703]	-
ENSG00000153976	8.42419	17.4639	8.68451	14.0892	19.6408	HS3ST3A1	17	13495689	13601927	-	2628	protein_coding	heparan sulfate-glucosamine 3-sulfotransferase 3A1 [Source:HGNC Symbol;Acc:HGNC:5196]	-
ENSG00000120217	0.430041	1.95008	0.29121	1.92302	2.1488	CD274	9	5450503	5470566	+	4108	protein_coding	CD274 molecule [Source:HGNC Symbol;Acc:HGNC:17635]	-
ENSG00000213366	4.17479	2.07569	5.06789	2.28489	2.29857	GSTM2	1	109668022	109709551	+	9116	protein_coding	glutathione S-transferase mu 2 [Source:HGNC Symbol;Acc:HGNC:4634]	-
ENSG00000184635	0.379953	1.65607	0.295494	1.15023	1.40107	ZNF93	19	19900913	19963464	+	5579	protein_coding	zinc finger protein 93 [Source:HGNC Symbol;Acc:HGNC:13169]	zf-C2H2
ENSG00000163702	18.1659	10.2319	19.2038	16.405	12.349	IL17RC	3	9917074	9933630	+	4540	protein_coding	interleukin 17 receptor C [Source:HGNC Symbol;Acc:HGNC:18358]	-
ENSG00000105426	18.636	10.9052	25.9166	9.52122	10.8732	PTPRS	19	5158495	5340803	-	8565	protein_coding	protein tyrosine phosphatase, receptor type S [Source:HGNC Symbol;Acc:HGNC:9681]	-
ENSG00000148297	3.65343	6.60758	4.32202	6.08636	5.44675	MED22	9	133338323	133348131	-	7224	protein_coding	mediator complex subunit 22 [Source:HGNC Symbol;Acc:HGNC:11477]	-
ENSG00000221926	7.53183	3.43534	6.45334	7.07449	5.29097	TRIM16	17	15627960	15684311	-	5640	protein_coding	tripartite motif containing 16 [Source:HGNC Symbol;Acc:HGNC:17241]	-
ENSG00000104419	31.0004	4.14411	135.766	8.19914	4.7416	NDRG1	8	133237171	133302022	-	9823	protein_coding	N-myc downstream regulated 1 [Source:HGNC Symbol;Acc:HGNC:7679]	-
ENSG00000102699	30.4751	19.4595	24.4375	15.3729	21.4609	PARP4	13	24420926	24512810	-	6080	protein_coding	poly(ADP-ribose) polymerase family member 4 [Source:HGNC Symbol;Acc:HGNC:271]	-
ENSG00000205476	0.768326	1.70463	0.994316	1.11728	1.41546	CCDC85C	14	99500180	99604026	-	17449	protein_coding	coiled-coil domain containing 85C [Source:HGNC Symbol;Acc:HGNC:35459]	-
ENSG00000163735	2.04663	0.153627	2.12549	0.159237	0.124577	CXCL5	4	73995642	73998779	-	2538	protein_coding	C-X-C motif chemokine ligand 5 [Source:HGNC Symbol;Acc:HGNC:10642]	-
ENSG00000133835	10.1325	6.18458	8.82513	6.09301	5.96343	HSD17B4	5	119452443	119637199	+	10664	protein_coding	hydroxysteroid 17-beta dehydrogenase 4 [Source:HGNC Symbol;Acc:HGNC:5213]	-
ENSG00000144746	68.5686	43.3185	74.2018	50.0906	45.0917	ARL6IP5	3	69084944	69106066	+	2522	protein_coding	ADP ribosylation factor like GTPase 6 interacting protein 5 [Source:HGNC Symbol;Acc:HGNC:16937]	-
ENSG00000064042	2.07245	3.92477	1.74139	3.85052	4.65572	LIMCH1	4	41359607	41700044	+	10862	protein_coding	LIM and calponin homology domains 1 [Source:HGNC Symbol;Acc:HGNC:29191]	-
ENSG00000075391	1.31308	2.6611	1.25674	1.69375	2.60472	RASAL2	1	178094141	178484147	+	16044	protein_coding	RAS protein activator like 2 [Source:HGNC Symbol;Acc:HGNC:9874]	-
ENSG00000103067	1.00065	0.0262993	1.15702	0.0115129	0.0580266	ESRP2	16	68229111	68238102	-	5563	protein_coding	epithelial splicing regulatory protein 2 [Source:HGNC Symbol;Acc:HGNC:26152]	-
ENSG00000006125	47.2956	31.6131	46.6401	29.2581	34.4033	AP2B1	17	35578046	35726409	+	7587	protein_coding	adaptor related protein complex 2 subunit beta 1 [Source:HGNC Symbol;Acc:HGNC:563]	-
ENSG00000136875	7.9313	14.3818	5.94984	11.2303	12.8748	PRPF4	9	113275343	113292905	+	3613	protein_coding	pre-mRNA processing factor 4 [Source:HGNC Symbol;Acc:HGNC:17349]	-
ENSG00000168010	2.04521	4.06597	4.0782	3.77193	3.48038	ATG16L2	11	72814308	72843674	+	8617	protein_coding	autophagy related 16 like 2 [Source:HGNC Symbol;Acc:HGNC:25464]	-
ENSG00000182372	6.18607	3.2392	3.94846	3.12167	3.32851	CLN8	8	1755778	1801711	+	9459	protein_coding	CLN8, transmembrane ER and ERGIC protein [Source:HGNC Symbol;Acc:HGNC:2079]	-
ENSG00000142552	84.9268	150.463	125.543	234.976	141.145	RCN3	19	49527618	49546962	+	2093	protein_coding	reticulocalbin 3 [Source:HGNC Symbol;Acc:HGNC:21145]	-
ENSG00000157680	1.24066	2.45406	2.89039	3.77192	3.96437	DGKI	7	137381037	137847092	-	15549	protein_coding	diacylglycerol kinase iota [Source:HGNC Symbol;Acc:HGNC:2855]	-
ENSG00000102760	1.86783	10.1758	8.00437	10.3048	7.73398	RGCC	13	41457559	41470882	+	1032	protein_coding	regulator of cell cycle [Source:HGNC Symbol;Acc:HGNC:20369]	-
ENSG00000137831	24.6875	37.1976	26.1694	30.7208	35.4576	UACA	15	70654554	70763593	-	11031	protein_coding	uveal autoantigen with coiled-coil domains and ankyrin repeats [Source:HGNC Symbol;Acc:HGNC:15947]	-
ENSG00000102287	2.85679	1.26856	3.59901	1.95839	1.87165	GABRE	X	151953124	151974680	-	9612	protein_coding	gamma-aminobutyric acid type A receptor epsilon subunit [Source:HGNC Symbol;Acc:HGNC:4085]	-
ENSG00000176915	5.98219	9.07951	5.61012	9.39527	9.58471	ANKLE2	12	132725503	132761888	-	17517	protein_coding	ankyrin repeat and LEM domain containing 2 [Source:HGNC Symbol;Acc:HGNC:29101]	-
ENSG00000131236	51.8837	78.4212	49.9895	52.9929	75.015	CAP1	1	40040233	40072649	+	3814	protein_coding	cyclase associated actin cytoskeleton regulatory protein 1 [Source:HGNC Symbol;Acc:HGNC:20040]	-
ENSG00000136240	74.1203	104.63	76.1626	119.37	115.517	KDELR2	7	6445953	6484242	-	3990	protein_coding	KDEL endoplasmic reticulum protein retention receptor 2 [Source:HGNC Symbol;Acc:HGNC:6305]	-
ENSG00000148229	10.6254	18.8159	9.81308	18.665	19.5946	POLE3	9	113407235	113410672	-	2604	protein_coding	DNA polymerase epsilon 3, accessory subunit [Source:HGNC Symbol;Acc:HGNC:13546]	-
ENSG00000168765	6.05323	2.98497	6.25734	3.65696	3.02582	GSTM4	1	109656081	109674836	+	5745	protein_coding	glutathione S-transferase mu 4 [Source:HGNC Symbol;Acc:HGNC:4636]	-
ENSG00000064195	1.89628	0.0747278	1.26863	0.35796	0.232719	DLX3	17	49990005	49995224	-	2715	protein_coding	distal-less homeobox 3 [Source:HGNC Symbol;Acc:HGNC:2916]	Homeobox
ENSG00000134202	19.307	11.3333	17.4764	20.3364	12.7038	GSTM3	1	109733932	109741038	-	4750	protein_coding	glutathione S-transferase mu 3 [Source:HGNC Symbol;Acc:HGNC:4635]	-
ENSG00000143126	1.09795	0.29235	0.993025	0.303457	0.35956	CELSR2	1	109250019	109275750	+	12349	protein_coding	cadherin EGF LAG seven-pass G-type receptor 2 [Source:HGNC Symbol;Acc:HGNC:3231]	-
ENSG00000173540	3.18823	6.63575	3.37563	7.60213	6.19912	GMPPB	3	49716844	49723951	-	6742	protein_coding	GDP-mannose pyrophosphorylase B [Source:HGNC Symbol;Acc:HGNC:22932]	-
ENSG00000100479	0.440197	2.42718	0.36033	2.10968	2.2391	POLE2	14	49643555	49688422	-	2955	protein_coding	DNA polymerase epsilon 2, accessory subunit [Source:HGNC Symbol;Acc:HGNC:9178]	-
ENSG00000172638	40.6729	67.9428	62.0059	78.1226	65.0173	EFEMP2	11	65866441	65873592	-	5397	protein_coding	EGF containing fibulin extracellular matrix protein 2 [Source:HGNC Symbol;Acc:HGNC:3219]	-
ENSG00000131016	12.2482	20.264	12.8378	14.4904	19.813	AKAP12	6	151239999	151358557	+	8741	protein_coding	A-kinase anchoring protein 12 [Source:HGNC Symbol;Acc:HGNC:370]	-
ENSG00000127603	4.6173	8.20495	4.97292	6.433	8.47731	MACF1	1	39081316	39487177	+	40739	protein_coding	microtubule-actin crosslinking factor 1 [Source:HGNC Symbol;Acc:HGNC:13664]	-
ENSG00000110446	3.37811	1.17457	4.91503	1.6273	1.46119	SLC15A3	11	60937084	60952530	-	6118	protein_coding	solute carrier family 15 member 3 [Source:HGNC Symbol;Acc:HGNC:18068]	-
ENSG00000170921	2.03838	3.46558	3.11576	2.83462	3.73438	TANC2	17	63009556	63427699	+	22866	protein_coding	tetratricopeptide repeat, ankyrin repeat and coiled-coil containing 2 [Source:HGNC Symbol;Acc:HGNC:30212]	-
ENSG00000103326	7.76662	13.3203	7.14222	11.695	13.207	CAPN15	16	527717	554636	+	7987	protein_coding	calpain 15 [Source:HGNC Symbol;Acc:HGNC:11182]	Others
ENSG00000100526	1.15257	4.67021	0.777076	4.39616	4.78143	CDKN3	14	54396849	54420218	+	1836	protein_coding	cyclin dependent kinase inhibitor 3 [Source:HGNC Symbol;Acc:HGNC:1791]	-
ENSG00000139211	24.6772	41.9795	20.0732	59.0552	52.4339	AMIGO2	12	47075707	47079951	-	3956	protein_coding	adhesion molecule with Ig like domain 2 [Source:HGNC Symbol;Acc:HGNC:24073]	-
ENSG00000138346	1.01244	2.94775	0.888953	2.22467	2.30052	DNA2	10	68414064	68472121	-	4867	protein_coding	DNA replication helicase/nuclease 2 [Source:HGNC Symbol;Acc:HGNC:2939]	-
ENSG00000128602	4.6753	1.80754	3.91038	2.05944	1.93004	SMO	7	129188872	129213545	+	4311	protein_coding	smoothened, frizzled class receptor [Source:HGNC Symbol;Acc:HGNC:11119]	-
ENSG00000259207	11.7372	6.07962	9.76668	7.35905	8.42254	ITGB3	17	47253846	47311816	+	4394	protein_coding	integrin subunit beta 3 [Source:HGNC Symbol;Acc:HGNC:6156]	-
ENSG00000187210	0.356839	1.2453	0.264108	1.12617	1.26776	GCNT1	9	76419850	76651203	+	9251	protein_coding	glucosaminyl (N-acetyl) transferase 1, core 2 [Source:HGNC Symbol;Acc:HGNC:4203]	-
ENSG00000125384	2.25675	0.233289	1.29501	0.46858	0.439821	PTGER2	14	52314305	52328606	+	2473	protein_coding	prostaglandin E receptor 2 [Source:HGNC Symbol;Acc:HGNC:9594]	-
ENSG00000152556	21.2853	13.578	19.8865	11.8724	12.6864	PFKM	12	48105139	48146404	+	7318	protein_coding	phosphofructokinase, muscle [Source:HGNC Symbol;Acc:HGNC:8877]	-
ENSG00000115414	530.639	796.935	716.374	763.202	948.006	FN1	2	215360440	215436172	-	17315	protein_coding	fibronectin 1 [Source:HGNC Symbol;Acc:HGNC:3778]	-
ENSG00000214517	7.98534	13.6467	9.42015	11.7407	13.2146	PPME1	11	74171099	74254703	+	7917	protein_coding	protein phosphatase methylesterase 1 [Source:HGNC Symbol;Acc:HGNC:30178]	-
ENSG00000198355	23.8499	13.3688	26.6899	12.4209	12.4776	PIM3	22	49960513	49964080	+	2461	protein_coding	Pim-3 proto-oncogene, serine/threonine kinase [Source:HGNC Symbol;Acc:HGNC:19310]	-
ENSG00000132793	10.084	5.31531	15.5881	5.54045	5.63883	LPIN3	20	41340920	41360582	+	4568	protein_coding	lipin 3 [Source:HGNC Symbol;Acc:HGNC:14451]	-
ENSG00000139370	6.29797	11.2382	9.51009	9.47409	10.2544	SLC15A4	12	128793191	128823983	-	5496	protein_coding	solute carrier family 15 member 4 [Source:HGNC Symbol;Acc:HGNC:23090]	-
ENSG00000130363	5.20185	2.42723	3.92328	2.41248	3.07531	RSPH3	6	158972871	159000187	-	6561	protein_coding	radial spoke head 3 homolog [Source:HGNC Symbol;Acc:HGNC:21054]	-
ENSG00000124098	28.7203	17.4081	29.6217	16.3068	17.8413	FAM210B	20	56358915	56368663	+	3577	protein_coding	family with sequence similarity 210 member B [Source:HGNC Symbol;Acc:HGNC:16102]	-
ENSG00000054983	6.62182	3.46007	5.68548	3.32175	3.7699	GALC	14	87837820	87993665	-	6825	protein_coding	galactosylceramidase [Source:HGNC Symbol;Acc:HGNC:4115]	-
ENSG00000055332	12.4632	6.82974	8.88693	5.39147	7.20865	EIF2AK2	2	37099210	37157065	-	10753	protein_coding	eukaryotic translation initiation factor 2 alpha kinase 2 [Source:HGNC Symbol;Acc:HGNC:9437]	-
ENSG00000181019	249.276	161.545	191.59	234.867	187.997	NQO1	16	69706996	69726951	-	3254	protein_coding	NAD(P)H quinone dehydrogenase 1 [Source:HGNC Symbol;Acc:HGNC:2874]	-
ENSG00000123689	15.0157	4.71023	22.2819	6.57836	4.93219	G0S2	1	209675420	209676388	+	866	protein_coding	G0/G1 switch 2 [Source:HGNC Symbol;Acc:HGNC:30229]	-
ENSG00000055163	2.73074	1.27292	3.09372	0.962124	1.33498	CYFIP2	5	157266079	157395595	+	10498	protein_coding	cytoplasmic FMR1 interacting protein 2 [Source:HGNC Symbol;Acc:HGNC:13760]	-
ENSG00000071537	29.0634	16.4144	24.4504	15.9551	19.9095	SEL1L	14	81471549	81533861	-	9559	protein_coding	SEL1L, ERAD E3 ligase adaptor subunit [Source:HGNC Symbol;Acc:HGNC:10717]	-
ENSG00000090020	34.0899	21.433	32.6008	18.9216	23.2635	SLC9A1	1	27098815	27166981	-	5974	protein_coding	solute carrier family 9 member A1 [Source:HGNC Symbol;Acc:HGNC:11071]	-
ENSG00000117395	17.0943	28.4606	11.8358	32.3762	25.6523	EBNA1BP2	1	43164175	43270936	-	3561	protein_coding	EBNA1 binding protein 2 [Source:HGNC Symbol;Acc:HGNC:15531]	-
ENSG00000145901	22.5508	13.5586	35.2523	18.504	15.2653	TNIP1	5	151029945	151093577	-	5793	protein_coding	TNFAIP3 interacting protein 1 [Source:HGNC Symbol;Acc:HGNC:16903]	-
ENSG00000166311	116.293	74.7212	120.381	91.4802	77.2809	SMPD1	11	6390431	6394998	+	2750	protein_coding	sphingomyelin phosphodiesterase 1 [Source:HGNC Symbol;Acc:HGNC:11120]	-
ENSG00000158292	10.4352	5.34903	10.8683	5.20264	5.97466	GPR153	1	6247346	6260975	-	4082	protein_coding	G protein-coupled receptor 153 [Source:HGNC Symbol;Acc:HGNC:23618]	-
ENSG00000115241	21.519	33.3118	19.1218	35.3856	31.5986	PPM1G	2	27381194	27409687	-	4092	protein_coding	protein phosphatase, Mg2+/Mn2+ dependent 1G [Source:HGNC Symbol;Acc:HGNC:9278]	-
ENSG00000135709	7.30982	4.05288	6.38065	4.54022	4.19628	KIAA0513	16	85027751	85094230	+	8837	protein_coding	KIAA0513 [Source:HGNC Symbol;Acc:HGNC:29058]	-
ENSG00000127948	20.7917	12.9399	20.5815	15.0527	13.9048	POR	7	75899200	75986855	+	6112	protein_coding	cytochrome p450 oxidoreductase [Source:HGNC Symbol;Acc:HGNC:9208]	-
ENSG00000149554	2.7222	5.1956	3.95435	4.47734	4.99536	CHEK1	11	125625136	125676255	+	6558	protein_coding	checkpoint kinase 1 [Source:HGNC Symbol;Acc:HGNC:1925]	-
ENSG00000105499	2.42769	0.883157	2.3395	1.19066	1.0087	PLA2G4C	19	48047843	48110817	-	6613	protein_coding	phospholipase A2 group IVC [Source:HGNC Symbol;Acc:HGNC:9037]	-
ENSG00000196781	10.7837	5.31608	13.4782	6.56424	6.74722	TLE1	9	81583683	81689305	-	4906	protein_coding	transducin like enhancer of split 1 [Source:HGNC Symbol;Acc:HGNC:11837]	-
ENSG00000136824	3.87998	7.1587	5.40258	4.94073	6.94104	SMC2	9	104094260	104141417	+	6468	protein_coding	structural maintenance of chromosomes 2 [Source:HGNC Symbol;Acc:HGNC:14011]	-
ENSG00000097021	13.8239	22.7551	13.77	22.5794	21.1478	ACOT7	1	6264269	6394391	-	4124	protein_coding	acyl-CoA thioesterase 7 [Source:HGNC Symbol;Acc:HGNC:24157]	-
ENSG00000115252	0.809505	0.0655609	1.06056	0.173988	0.171338	PDE1A	2	182140036	182523192	-	6322	protein_coding	phosphodiesterase 1A [Source:HGNC Symbol;Acc:HGNC:8774]	-
ENSG00000183010	10.583	21.0584	14.9893	21.9133	21.5029	PYCR1	17	81932384	81942412	-	2886	protein_coding	pyrroline-5-carboxylate reductase 1 [Source:HGNC Symbol;Acc:HGNC:9721]	-
ENSG00000167106	18.2999	10.7579	17.0122	8.23838	10.1743	FAM102A	9	127940579	127980513	-	6100	protein_coding	family with sequence similarity 102 member A [Source:HGNC Symbol;Acc:HGNC:31419]	-
ENSG00000170412	1.11169	0.244214	1.71946	0.318034	0.279061	GPRC5C	17	74424851	74451653	+	8005	protein_coding	G protein-coupled receptor class C group 5 member C [Source:HGNC Symbol;Acc:HGNC:13309]	-
ENSG00000033867	2.14483	4.58749	2.78816	3.9573	5.2257	SLC4A7	3	27372721	27484420	-	9616	protein_coding	solute carrier family 4 member 7 [Source:HGNC Symbol;Acc:HGNC:11033]	-
ENSG00000137814	5.11386	9.45992	4.40413	8.06414	9.42157	HAUS2	15	42548810	42569994	+	4323	protein_coding	HAUS augmin like complex subunit 2 [Source:HGNC Symbol;Acc:HGNC:25530]	-
ENSG00000104626	2.76566	5.68123	2.26034	4.61631	5.64749	ERI1	8	9002147	9116746	+	6385	protein_coding	exoribonuclease 1 [Source:HGNC Symbol;Acc:HGNC:23994]	-
ENSG00000161996	2.40853	4.51704	3.49486	3.98336	4.52862	WDR90	16	649311	667833	+	10534	protein_coding	WD repeat domain 90 [Source:HGNC Symbol;Acc:HGNC:26960]	-
ENSG00000059378	2.82836	1.06652	2.26798	1.49016	1.21291	PARP12	7	140023744	140063721	-	6285	protein_coding	poly(ADP-ribose) polymerase family member 12 [Source:HGNC Symbol;Acc:HGNC:21919]	-
ENSG00000166250	40.2442	58.1689	48.1455	48.9956	58.0196	CLMP	11	123069865	123195281	-	5097	protein_coding	CXADR like membrane protein [Source:HGNC Symbol;Acc:HGNC:24039]	-
ENSG00000072310	20.7158	12.4128	24.477	12.2699	11.276	SREBF1	17	17810399	17837002	-	8030	protein_coding	sterol regulatory element binding transcription factor 1 [Source:HGNC Symbol;Acc:HGNC:11289]	bHLH
ENSG00000143850	5.98107	2.80105	17.525	3.82511	3.95231	PLEKHA6	1	204218851	204377665	-	8251	protein_coding	pleckstrin homology domain containing A6 [Source:HGNC Symbol;Acc:HGNC:17053]	-
ENSG00000112294	1.66783	0.393052	0.743442	0.511389	0.494971	ALDH5A1	6	24494852	24537207	+	5525	protein_coding	aldehyde dehydrogenase 5 family member A1 [Source:HGNC Symbol;Acc:HGNC:408]	-
ENSG00000135414	8.15242	4.71274	7.04925	4.34831	4.33515	GDF11	12	55743280	55757278	+	8657	protein_coding	growth differentiation factor 11 [Source:HGNC Symbol;Acc:HGNC:4216]	-
ENSG00000186591	41.5091	27.931	45.9834	29.3722	28.8048	UBE2H	7	129830732	129952949	-	6503	protein_coding	ubiquitin conjugating enzyme E2 H [Source:HGNC Symbol;Acc:HGNC:12484]	-
ENSG00000132661	6.55635	16.6122	5.99847	19.1984	14.5629	NXT1	20	23350736	23354777	+	1123	protein_coding	nuclear transport factor 2 like export factor 1 [Source:HGNC Symbol;Acc:HGNC:15913]	-
ENSG00000108468	19.7883	32.8597	24.4688	27.2333	29.1531	CBX1	17	48070052	48101521	-	3087	protein_coding	chromobox 1 [Source:HGNC Symbol;Acc:HGNC:1551]	-
ENSG00000179958	8.7452	18.0776	7.30306	23.4097	16.7544	DCTPP1	16	30423619	30430075	-	1581	protein_coding	dCTP pyrophosphatase 1 [Source:HGNC Symbol;Acc:HGNC:28777]	-
ENSG00000182667	9.46458	5.34792	11.4205	4.11831	5.13151	NTM	11	131370478	132336822	+	6956	protein_coding	neurotrimin [Source:HGNC Symbol;Acc:HGNC:17941]	-
ENSG00000142279	2.63092	4.77302	1.64352	5.83503	4.73786	WTIP	19	34481638	34512304	+	13733	protein_coding	WT1 interacting protein [Source:HGNC Symbol;Acc:HGNC:20964]	-
ENSG00000215190	1.62736	4.51423	1.97993	4.65112	4.47477	LINC00680	6	57946074	57961501	-	2969	transcribed_unprocessed_pseudogene	long intergenic non-protein coding RNA 680 [Source:HGNC Symbol;Acc:HGNC:44417]	-
ENSG00000100219	21.492	34.7307	31.9434	41.0551	36.8635	XBP1	22	28794555	28800597	-	3028	protein_coding	X-box binding protein 1 [Source:HGNC Symbol;Acc:HGNC:12801]	TF_bZIP
ENSG00000123908	2.05389	4.19574	2.38171	3.3223	4.36807	AGO2	8	140520156	140635619	-	15833	protein_coding	argonaute 2, RISC catalytic component [Source:HGNC Symbol;Acc:HGNC:3263]	-
ENSG00000123989	216.554	136.368	207.279	148.212	143.989	CHPF	2	219538947	219543787	-	3354	protein_coding	chondroitin polymerizing factor [Source:HGNC Symbol;Acc:HGNC:24291]	-
ENSG00000139350	4.55269	9.2525	3.68128	8.99511	10.1595	NEDD1	12	96907223	96953777	+	4463	protein_coding	neural precursor cell expressed, developmentally down-regulated 1 [Source:HGNC Symbol;Acc:HGNC:7723]	-
ENSG00000102181	39.8915	26.0959	39.7713	27.3402	26.6519	CD99L2	X	150766337	150898816	-	5762	protein_coding	CD99 molecule like 2 [Source:HGNC Symbol;Acc:HGNC:18237]	-
ENSG00000129911	10.2288	18.0727	13.9097	17.3963	18.6016	KLF16	19	1852399	1863568	-	2955	protein_coding	Kruppel like factor 16 [Source:HGNC Symbol;Acc:HGNC:16857]	zf-C2H2
ENSG00000158106	1.22223	0.0952455	1.87263	0.0736061	0.0368482	RHPN1	8	143368887	143384220	+	4172	protein_coding	rhophilin Rho GTPase binding protein 1 [Source:HGNC Symbol;Acc:HGNC:19973]	-
ENSG00000197555	2.89464	4.96141	3.33045	4.72386	5.51478	SIPA1L1	14	71320449	71741229	+	12412	protein_coding	signal induced proliferation associated 1 like 1 [Source:HGNC Symbol;Acc:HGNC:20284]	-
ENSG00000206560	5.18242	8.46136	7.11619	7.21878	8.86807	ANKRD28	3	15667236	15859771	-	11276	protein_coding	ankyrin repeat domain 28 [Source:HGNC Symbol;Acc:HGNC:29024]	-
ENSG00000173391	1.60005	4.9305	2.56447	6.96504	7.35644	OLR1	12	10158301	10172138	-	3057	protein_coding	oxidized low density lipoprotein receptor 1 [Source:HGNC Symbol;Acc:HGNC:8133]	-
ENSG00000113657	15.785	24.084	24.6883	23.9423	24.635	DPYSL3	5	147390811	147510056	-	7164	protein_coding	dihydropyrimidinase like 3 [Source:HGNC Symbol;Acc:HGNC:3015]	-
ENSG00000142149	0.337361	1.1897	0.520494	1.66027	1.55781	HUNK	21	31873315	32044633	+	8294	protein_coding	hormonally up-regulated Neu-associated kinase [Source:HGNC Symbol;Acc:HGNC:13326]	-
ENSG00000141076	6.9547	11.8593	6.58714	8.8221	11.4494	UTP4	16	69131291	69231130	+	5681	protein_coding	UTP4, small subunit processome component [Source:HGNC Symbol;Acc:HGNC:1983]	-
ENSG00000112208	5.7756	9.6799	3.31652	9.81223	9.69667	BAG2	6	57172326	57189833	+	6651	protein_coding	BCL2 associated athanogene 2 [Source:HGNC Symbol;Acc:HGNC:938]	-
ENSG00000105443	8.90443	5.5172	9.2685	6.83384	5.72045	CYTH2	19	48469032	48482314	+	9509	protein_coding	cytohesin 2 [Source:HGNC Symbol;Acc:HGNC:9502]	-
ENSG00000089159	24.4136	37.1761	27.2437	28.3851	36.5244	PXN	12	120210439	120265771	-	7460	protein_coding	paxillin [Source:HGNC Symbol;Acc:HGNC:9718]	-
ENSG00000006715	12.9977	8.03073	11.745	7.43335	7.98025	VPS41	7	38722963	38932394	-	7801	protein_coding	VPS41, HOPS complex subunit [Source:HGNC Symbol;Acc:HGNC:12713]	-
ENSG00000148180	43.9714	28.2846	56.0284	39.4744	30.6605	GSN	9	121207794	121332843	+	11018	protein_coding	gelsolin [Source:HGNC Symbol;Acc:HGNC:4620]	-
ENSG00000181072	3.59398	6.72657	8.02307	10.188	10.3459	CHRM2	7	136868669	137020255	+	8322	protein_coding	cholinergic receptor muscarinic 2 [Source:HGNC Symbol;Acc:HGNC:1951]	-
ENSG00000100504	14.4578	8.24297	19.3075	12.15	9.9594	PYGL	14	50857891	50944736	-	4798	protein_coding	glycogen phosphorylase L [Source:HGNC Symbol;Acc:HGNC:9725]	-
ENSG00000135776	5.51499	10.5073	3.21445	8.96103	10.0169	ABCB10	1	229516582	229558695	-	4256	protein_coding	ATP binding cassette subfamily B member 10 [Source:HGNC Symbol;Acc:HGNC:41]	-
ENSG00000007968	0.0487134	0.770222	0.0627578	0.500201	0.755809	E2F2	1	23506430	23531220	-	5457	protein_coding	E2F transcription factor 2 [Source:HGNC Symbol;Acc:HGNC:3114]	E2F
ENSG00000115355	1.13886	2.04359	1.23921	1.81116	2.29	CCDC88A	2	55287842	55419895	-	33942	protein_coding	coiled-coil domain containing 88A [Source:HGNC Symbol;Acc:HGNC:25523]	-
ENSG00000164330	1.63874	0.419091	1.93999	0.592322	0.711029	EBF1	5	158695916	159099761	-	6178	protein_coding	early B cell factor 1 [Source:HGNC Symbol;Acc:HGNC:3126]	COE
ENSG00000115594	23.7258	15.2768	33.3683	14.0386	17.6498	IL1R1	2	102064544	102179874	+	7083	protein_coding	interleukin 1 receptor type 1 [Source:HGNC Symbol;Acc:HGNC:5993]	-
ENSG00000106853	21.3922	12.5073	20.0131	17.173	12.8192	PTGR1	9	111549722	111599893	-	3760	protein_coding	prostaglandin reductase 1 [Source:HGNC Symbol;Acc:HGNC:18429]	-
ENSG00000138640	2.74246	1.12753	7.87953	1.21282	1.34299	FAM13A	4	88725955	89111398	-	13215	protein_coding	family with sequence similarity 13 member A [Source:HGNC Symbol;Acc:HGNC:19367]	-
ENSG00000006634	1.23754	3.5457	0.779297	2.80177	3.47896	DBF4	7	87876216	87909541	+	4583	protein_coding	DBF4 zinc finger [Source:HGNC Symbol;Acc:HGNC:17364]	-
ENSG00000119812	11.8414	19.5301	7.33489	17.8663	20.3679	FAM98A	2	33583658	33599382	-	4921	protein_coding	family with sequence similarity 98 member A [Source:HGNC Symbol;Acc:HGNC:24520]	-
ENSG00000187068	0.369756	1.44148	0.208163	0.94939	1.39357	C3orf70	3	185078050	185153014	-	5901	protein_coding	chromosome 3 open reading frame 70 [Source:HGNC Symbol;Acc:HGNC:33731]	-
ENSG00000162413	35.6473	21.6161	26.8941	19.3466	22.4818	KLHL21	1	6590724	6614607	-	6901	protein_coding	kelch like family member 21 [Source:HGNC Symbol;Acc:HGNC:29041]	-
ENSG00000180875	4.27521	8.53978	12.8448	7.98409	8.92853	GREM2	1	240489573	240612149	-	4170	protein_coding	gremlin 2, DAN family BMP antagonist [Source:HGNC Symbol;Acc:HGNC:17655]	-
ENSG00000166130	18.9982	30.2516	21.5318	32.1665	29.9198	IKBIP	12	98613405	98645113	-	4163	protein_coding	IKBKB interacting protein [Source:HGNC Symbol;Acc:HGNC:26430]	-
ENSG00000132854	3.7435	1.53595	8.01153	4.03519	4.20452	KANK4	1	62236979	62319414	-	5980	protein_coding	KN motif and ankyrin repeat domains 4 [Source:HGNC Symbol;Acc:HGNC:27263]	-
ENSG00000101945	1.16237	3.87067	1.16286	3.43475	2.77946	SUV39H1	X	48695554	48709012	+	3368	protein_coding	suppressor of variegation 3-9 homolog 1 [Source:HGNC Symbol;Acc:HGNC:11479]	-
ENSG00000156931	6.25704	3.6727	4.99724	3.35656	4.08161	VPS8	3	184812143	185052614	+	10366	protein_coding	VPS8, CORVET complex subunit [Source:HGNC Symbol;Acc:HGNC:29122]	-
ENSG00000105204	15.7776	8.08913	23.3589	8.55539	8.31698	DYRK1B	19	39825350	39834201	-	3192	protein_coding	dual specificity tyrosine phosphorylation regulated kinase 1B [Source:HGNC Symbol;Acc:HGNC:3092]	-
ENSG00000142494	0.993027	0.119848	0.771468	0.158951	0.124628	SLC47A1	17	19495385	19579034	+	5719	protein_coding	solute carrier family 47 member 1 [Source:HGNC Symbol;Acc:HGNC:25588]	-
ENSG00000186522	20.9333	31.4284	25.7638	30.5829	33.5209	2023-09-10	2	109542982	109614206	-	4131	protein_coding	septin 10 [Source:HGNC Symbol;Acc:HGNC:14349]	-
ENSG00000180628	2.29214	4.3643	2.02387	3.31735	4.06707	PCGF5	10	91163012	91284331	+	8306	protein_coding	polycomb group ring finger 5 [Source:HGNC Symbol;Acc:HGNC:28264]	-
ENSG00000162337	13.8969	8.24201	14.0811	9.16255	9.3311	LRP5	11	68312609	68449275	+	6164	protein_coding	LDL receptor related protein 5 [Source:HGNC Symbol;Acc:HGNC:6697]	-
ENSG00000160447	0.872314	3.03427	0.813138	3.12565	3.10159	PKN3	9	128702523	128720918	+	3375	protein_coding	protein kinase N3 [Source:HGNC Symbol;Acc:HGNC:17999]	-
ENSG00000151287	3.27375	8.07405	2.33294	8.01816	7.39469	TEX30	13	102765990	102773811	-	2154	protein_coding	testis expressed 30 [Source:HGNC Symbol;Acc:HGNC:25188]	-
ENSG00000079308	8.86598	14.6708	18.4271	16.0478	17.8393	TNS1	2	217799588	218033982	-	16281	protein_coding	tensin 1 [Source:HGNC Symbol;Acc:HGNC:11973]	-
ENSG00000255248	3.06767	5.11377	4.85537	6.38202	5.9316	MIR100HG	11	122028327	122556721	-	19385	processed_transcript	mir-100-let-7a-2-mir-125b-1 cluster host gene [Source:HGNC Symbol;Acc:HGNC:39522]	-
ENSG00000163083	0.285275	1.84195	1.42315	2.50113	2.6778	INHBB	2	120346143	120351808	+	3204	protein_coding	inhibin subunit beta B [Source:HGNC Symbol;Acc:HGNC:6067]	-
ENSG00000131773	1.40489	2.90325	1.19817	2.66902	2.89514	KHDRBS3	8	135457457	135656722	+	8645	protein_coding	KH RNA binding domain containing, signal transduction associated 3 [Source:HGNC Symbol;Acc:HGNC:18117]	-
ENSG00000113845	39.5666	24.4026	33.0752	31.2219	25.4567	TIMMDC1	3	119498532	119525090	+	2730	protein_coding	translocase of inner mitochondrial membrane domain containing 1 [Source:HGNC Symbol;Acc:HGNC:1321]	-
ENSG00000106571	5.58504	2.8332	4.4066	2.52279	3.34621	GLI3	7	41960950	42237870	-	10950	protein_coding	GLI family zinc finger 3 [Source:HGNC Symbol;Acc:HGNC:4319]	zf-C2H2
ENSG00000085415	2.00183	3.68196	1.41469	3.33711	3.61391	SEH1L	18	12947133	12987536	+	10481	protein_coding	SEH1 like nucleoporin [Source:HGNC Symbol;Acc:HGNC:30379]	-
ENSG00000198055	6.29203	11.0899	4.65068	11.618	10.3922	GRK6	5	177403204	177442901	+	4355	protein_coding	G protein-coupled receptor kinase 6 [Source:HGNC Symbol;Acc:HGNC:4545]	-
ENSG00000108424	28.0029	40.4023	27.8521	29.0895	41.071	KPNB1	17	47649476	47685505	+	7678	protein_coding	karyopherin subunit beta 1 [Source:HGNC Symbol;Acc:HGNC:6400]	-
ENSG00000164484	13.1892	20.2276	13.9952	16.6362	22.5074	TMEM200A	6	130365734	130443063	+	6137	protein_coding	transmembrane protein 200A [Source:HGNC Symbol;Acc:HGNC:21075]	-
ENSG00000108179	17.3621	28.4849	15.6778	31.9996	31.0819	PPIF	10	79347469	79355337	+	2674	protein_coding	peptidylprolyl isomerase F [Source:HGNC Symbol;Acc:HGNC:9259]	-
ENSG00000146083	6.43739	3.31588	10.3549	3.81796	3.40709	RNF44	5	176526697	176538025	-	5660	protein_coding	ring finger protein 44 [Source:HGNC Symbol;Acc:HGNC:19180]	-
ENSG00000183762	1.38929	0.416312	1.66283	0.576631	0.609231	KREMEN1	22	29073078	29168333	+	7977	protein_coding	kringle containing transmembrane protein 1 [Source:HGNC Symbol;Acc:HGNC:17550]	-
ENSG00000104341	32.151	19.6915	30.8805	23.2171	21.0052	LAPTM4B	8	97775057	97853013	+	3197	protein_coding	lysosomal protein transmembrane 4 beta [Source:HGNC Symbol;Acc:HGNC:13646]	-
ENSG00000152049	2.27115	0.5894	2.35751	0.795977	0.749796	KCNE4	2	223051814	223198399	+	4124	protein_coding	potassium voltage-gated channel subfamily E regulatory subunit 4 [Source:HGNC Symbol;Acc:HGNC:6244]	-
ENSG00000119508	1.19482	0.243293	2.40265	0.315992	0.276318	NR4A3	9	99821855	99866891	+	6314	protein_coding	nuclear receptor subfamily 4 group A member 3 [Source:HGNC Symbol;Acc:HGNC:7982]	NGFIB-like
ENSG00000068912	54.1783	34.4319	42.3158	40.3514	38.9779	ERLEC1	2	53787044	53818819	+	2592	protein_coding	endoplasmic reticulum lectin 1 [Source:HGNC Symbol;Acc:HGNC:25222]	-
ENSG00000150753	27.0591	40.8648	17.2669	41.4653	39.1061	CCT5	5	10249921	10266412	+	5839	protein_coding	chaperonin containing TCP1 subunit 5 [Source:HGNC Symbol;Acc:HGNC:1618]	-
ENSG00000071205	1.05094	2.35466	0.95905	2.21052	2.39787	ARHGAP10	4	147732063	148072780	+	10759	protein_coding	Rho GTPase activating protein 10 [Source:HGNC Symbol;Acc:HGNC:26099]	-
ENSG00000203499	0.997264	0.0293108	1.60858	0.0699886	0.0183741	IQANK1	8	143734140	143790644	+	4982	protein_coding	IQ motif and ankyrin repeat containing 1 [Source:HGNC Symbol;Acc:HGNC:49576]	-
ENSG00000105327	9.80974	4.62895	14.5271	4.86207	3.55426	BBC3	19	47220822	47232766	-	3180	protein_coding	BCL2 binding component 3 [Source:HGNC Symbol;Acc:HGNC:17868]	-
ENSG00000170961	0.0754679	1.0257	0.499042	1.16484	1.39532	HAS2	8	121612116	121641390	-	4190	protein_coding	hyaluronan synthase 2 [Source:HGNC Symbol;Acc:HGNC:4819]	-
ENSG00000170581	37.1234	23.9505	44.9385	19.6431	21.9238	STAT2	12	56341597	56360155	-	6109	protein_coding	signal transducer and activator of transcription 2 [Source:HGNC Symbol;Acc:HGNC:11363]	STAT
ENSG00000172965	1.63431	3.16901	1.07666	3.01354	3.51749	MIR4435-2HG	2	111036776	111523376	-	13094	lincRNA	MIR4435-2 host gene [Source:HGNC Symbol;Acc:HGNC:35163]	-
ENSG00000214548	8.61432	12.716	15.4118	13.097	13.1742	MEG3	14	100779410	100861031	+	23224	lincRNA	maternally expressed 3 [Source:HGNC Symbol;Acc:HGNC:14575]	-
ENSG00000148019	1.30587	2.51629	0.705964	2.11441	2.47933	CEP78	9	78236062	78279690	+	14355	protein_coding	centrosomal protein 78 [Source:HGNC Symbol;Acc:HGNC:25740]	-
ENSG00000130787	9.79245	5.5578	12.903	6.33607	5.51008	HIP1R	12	122834453	122862960	+	7102	protein_coding	huntingtin interacting protein 1 related [Source:HGNC Symbol;Acc:HGNC:18415]	-
ENSG00000135317	12.9296	7.91054	9.03	8.92882	8.68571	SNX14	6	85505496	85594156	-	7105	protein_coding	sorting nexin 14 [Source:HGNC Symbol;Acc:HGNC:14977]	-
ENSG00000091127	2.60493	5.54794	1.71586	4.46362	5.21724	PUS7	7	105439661	105522267	-	4421	protein_coding	pseudouridylate synthase 7 [Source:HGNC Symbol;Acc:HGNC:26033]	-
ENSG00000163704	7.10172	3.32439	6.74514	4.424	3.61433	PRRT3	3	9945542	9952394	-	3939	protein_coding	proline rich transmembrane protein 3 [Source:HGNC Symbol;Acc:HGNC:26591]	-
ENSG00000060718	4.73597	8.71785	9.30737	9.54242	11.2361	COL11A1	1	102876467	103108872	-	9091	protein_coding	collagen type XI alpha 1 chain [Source:HGNC Symbol;Acc:HGNC:2186]	-
ENSG00000067177	3.52122	1.35392	2.2287	1.30988	1.46197	PHKA1	X	72578814	72714319	-	6350	protein_coding	phosphorylase kinase regulatory subunit alpha 1 [Source:HGNC Symbol;Acc:HGNC:8925]	-
ENSG00000005884	42.8872	60.4253	39.6318	49.243	58.7828	ITGA3	17	50055968	50090481	+	9802	protein_coding	integrin subunit alpha 3 [Source:HGNC Symbol;Acc:HGNC:6139]	-
ENSG00000157514	8.64986	4.36364	8.91541	6.86966	4.55439	TSC22D3	X	107713221	107777342	-	4766	protein_coding	TSC22 domain family member 3 [Source:HGNC Symbol;Acc:HGNC:3051]	TSC22
ENSG00000072501	6.53421	10.1099	5.04159	6.91463	10.0207	SMC1A	X	53374149	53422728	-	10484	protein_coding	structural maintenance of chromosomes 1A [Source:HGNC Symbol;Acc:HGNC:11111]	-
ENSG00000111802	21.8771	12.5079	15.4988	14.8637	14.4515	TDP2	6	24649977	24667033	-	3082	protein_coding	tyrosyl-DNA phosphodiesterase 2 [Source:HGNC Symbol;Acc:HGNC:17768]	-
ENSG00000034713	32.6152	20.0408	29.4789	24.3206	19.4855	GABARAPL2	16	75566351	75577881	+	3034	protein_coding	GABA type A receptor associated protein like 2 [Source:HGNC Symbol;Acc:HGNC:13291]	-
ENSG00000112576	12.5996	19.035	6.838	19.6503	18.9436	CCND3	6	41934933	42050357	-	5802	protein_coding	cyclin D3 [Source:HGNC Symbol;Acc:HGNC:1585]	-
ENSG00000067066	6.75468	4.12709	6.97295	4.05147	4.0573	SP100	2	230415942	230544090	+	12618	protein_coding	SP100 nuclear antigen [Source:HGNC Symbol;Acc:HGNC:11206]	SAND
ENSG00000162144	8.07086	4.83988	6.30936	4.66493	5.02386	CYB561A3	11	61348745	61362299	-	10597	protein_coding	cytochrome b561 family member A3 [Source:HGNC Symbol;Acc:HGNC:23014]	-
ENSG00000127418	16.2541	9.65291	17.3259	9.61431	10.4689	FGFRL1	4	1009936	1026897	+	4145	protein_coding	fibroblast growth factor receptor like 1 [Source:HGNC Symbol;Acc:HGNC:3693]	-
ENSG00000167323	13.1835	8.0932	9.64381	7.35617	9.27696	STIM1	11	3854527	4093210	+	7130	protein_coding	stromal interaction molecule 1 [Source:HGNC Symbol;Acc:HGNC:11386]	-
ENSG00000197635	67.6837	47.0972	69.6668	41.4399	49.3532	DPP4	2	161992241	162074542	-	5009	protein_coding	dipeptidyl peptidase 4 [Source:HGNC Symbol;Acc:HGNC:3009]	-
ENSG00000115884	29.2221	47.3889	39.2647	41.3367	44.0839	SDC1	2	20200797	20225433	-	3595	protein_coding	syndecan 1 [Source:HGNC Symbol;Acc:HGNC:10658]	-
ENSG00000118564	18.6071	11.5597	13.5119	13.677	15.2626	FBXL5	4	15604539	15681679	-	4573	protein_coding	F-box and leucine rich repeat protein 5 [Source:HGNC Symbol;Acc:HGNC:13602]	-
ENSG00000155962	2.59661	0.518257	3.35195	0.745152	0.963643	CLIC2	X	155276211	155334657	-	2840	protein_coding	chloride intracellular channel 2 [Source:HGNC Symbol;Acc:HGNC:2063]	-
ENSG00000170899	9.03968	3.79084	11.5397	6.7456	5.02293	GSTA4	6	52977948	52995378	-	2175	protein_coding	glutathione S-transferase alpha 4 [Source:HGNC Symbol;Acc:HGNC:4629]	-
ENSG00000185972	0.267063	2.53657	0.683665	2.79027	2.41971	CCIN	9	36169394	36171334	+	1941	protein_coding	calicin [Source:HGNC Symbol;Acc:HGNC:1568]	-
ENSG00000093000	5.71317	9.23819	4.8577	6.8312	9.24263	NUP50	22	45163841	45188015	+	8318	protein_coding	nucleoporin 50 [Source:HGNC Symbol;Acc:HGNC:8065]	-
ENSG00000104886	8.00707	13.545	6.2903	16.9562	11.1293	PLEKHJ1	19	2230084	2237704	-	4655	protein_coding	pleckstrin homology domain containing J1 [Source:HGNC Symbol;Acc:HGNC:18211]	-
ENSG00000168495	3.80898	7.201	4.31875	7.34309	7.08226	POLR3D	8	22245104	22254600	+	5611	protein_coding	RNA polymerase III subunit D [Source:HGNC Symbol;Acc:HGNC:1080]	-
ENSG00000128039	6.1885	2.92412	5.97543	3.30517	3.04575	SRD5A3	4	55346109	55373096	+	4420	protein_coding	steroid 5 alpha-reductase 3 [Source:HGNC Symbol;Acc:HGNC:25812]	-
ENSG00000135316	18.9939	27.9846	16.3625	24.313	27.7262	SYNCRIP	6	85607785	85643792	-	8205	protein_coding	synaptotagmin binding cytoplasmic RNA interacting protein [Source:HGNC Symbol;Acc:HGNC:16918]	-
ENSG00000168936	33.6944	21.1832	28.172	24.5701	22.7963	TMEM129	4	1715952	1721358	-	3442	protein_coding	transmembrane protein 129 [Source:HGNC Symbol;Acc:HGNC:25137]	-
ENSG00000198805	2.36477	5.40417	1.74686	3.82375	4.77274	PNP	14	20468954	20477094	+	4139	protein_coding	purine nucleoside phosphorylase [Source:HGNC Symbol;Acc:HGNC:7892]	-
ENSG00000134769	0.793368	0.224116	0.883376	0.211437	0.256034	DTNA	18	34493290	34891844	+	12634	protein_coding	dystrobrevin alpha [Source:HGNC Symbol;Acc:HGNC:3057]	-
ENSG00000249669	0.220834	0.712268	0.317095	0.776016	0.592586	CARMN	5	149406689	149432835	+	17988	lincRNA	cardiac mesoderm enhancer-associated non-coding RNA [Source:HGNC Symbol;Acc:HGNC:42872]	-
ENSG00000205426	0.198486	2.25498	1.10211	4.76806	2.7011	KRT81	12	52285913	52291534	-	1929	protein_coding	keratin 81 [Source:HGNC Symbol;Acc:HGNC:6458]	-
ENSG00000090487	41.3869	26.0251	39.7899	25.3903	26.2662	SPG21	15	64963021	64990310	-	3984	protein_coding	SPG21, maspardin [Source:HGNC Symbol;Acc:HGNC:20373]	-
ENSG00000104219	4.50246	7.92329	4.08269	6.63241	8.35294	ZDHHC2	8	17156029	17224799	+	6735	protein_coding	zinc finger DHHC-type containing 2 [Source:HGNC Symbol;Acc:HGNC:18469]	-
ENSG00000158169	0.444947	1.13635	0.683065	0.939163	1.23859	FANCC	9	95099054	95426796	-	12809	protein_coding	FA complementation group C [Source:HGNC Symbol;Acc:HGNC:3584]	-
ENSG00000125827	15.8689	9.79358	11.1021	8.78539	9.87181	TMX4	20	7977348	8019829	-	6579	protein_coding	thioredoxin related transmembrane protein 4 [Source:HGNC Symbol;Acc:HGNC:25237]	-
ENSG00000169857	10.1376	19.7686	9.93036	23.6676	18.6942	AVEN	15	33866227	34039176	-	1808	protein_coding	apoptosis and caspase activation inhibitor [Source:HGNC Symbol;Acc:HGNC:13509]	-
ENSG00000140950	5.2333	8.52122	5.37265	8.42846	7.70895	TLDC1	16	84476421	84554033	-	8159	protein_coding	TBC/LysM-associated domain containing 1 [Source:HGNC Symbol;Acc:HGNC:29325]	-
ENSG00000101104	4.33923	8.03517	4.80453	7.13899	7.27	PABPC1L	20	44910062	44959035	+	4984	protein_coding	poly(A) binding protein cytoplasmic 1 like [Source:HGNC Symbol;Acc:HGNC:15797]	-
ENSG00000187079	13.6863	21.2214	15.0173	18.5409	24.6594	TEAD1	11	12674591	12944483	+	10279	protein_coding	TEA domain transcription factor 1 [Source:HGNC Symbol;Acc:HGNC:11714]	TEA
ENSG00000137575	65.9001	43.9427	70.9814	39.9631	41.481	SDCBP	8	58552924	58582860	+	4778	protein_coding	syndecan binding protein [Source:HGNC Symbol;Acc:HGNC:10662]	-
ENSG00000187951	0.198017	1.12316	0.215411	0.696236	1.12217	AC091057.1	15	30658717	30772993	+	5637	processed_transcript	OTU deubiquitinase 7A pseudogene [Source:NCBI gene;Acc:100288637]	-
ENSG00000102158	35.5861	22.9582	31.9957	22.5271	25.8842	MAGT1	X	77826364	77895593	-	4862	protein_coding	magnesium transporter 1 [Source:HGNC Symbol;Acc:HGNC:28880]	-
ENSG00000182197	24.7262	37.3504	22.3321	32.2499	39.1651	EXT1	8	117794490	118111853	-	8325	protein_coding	exostosin glycosyltransferase 1 [Source:HGNC Symbol;Acc:HGNC:3512]	-
ENSG00000102804	12.2585	7.64643	14.9398	8.12457	8.65135	TSC22D1	13	44432143	44577147	-	8586	protein_coding	TSC22 domain family member 1 [Source:HGNC Symbol;Acc:HGNC:16826]	TSC22
ENSG00000178385	2.19722	0.902782	2.03724	0.872466	1.11136	PLEKHM3	2	207821288	208025560	-	11671	protein_coding	pleckstrin homology domain containing M3 [Source:HGNC Symbol;Acc:HGNC:34006]	-
ENSG00000063046	66.6697	43.9967	80.3192	44.1011	42.9594	EIF4B	12	53006158	53042209	+	6146	protein_coding	eukaryotic translation initiation factor 4B [Source:HGNC Symbol;Acc:HGNC:3285]	-
ENSG00000148700	9.87161	5.62783	13.0441	6.50963	6.52485	ADD3	10	109996368	110135565	+	6541	protein_coding	adducin 3 [Source:HGNC Symbol;Acc:HGNC:245]	-
ENSG00000132182	0.735484	0.0102394	1.04024	0.00508419	0.00491557	NUP210	3	13316235	13420309	-	8182	protein_coding	nucleoporin 210 [Source:HGNC Symbol;Acc:HGNC:30052]	-
ENSG00000213676	32.3611	20.8648	36.5968	18.1595	20.9797	ATF6B	6	32115264	32128253	-	3629	protein_coding	activating transcription factor 6 beta [Source:HGNC Symbol;Acc:HGNC:2349]	TF_bZIP
ENSG00000160293	5.60394	9.41094	5.6286	8.6889	9.54895	VAV2	9	133761894	133992604	-	5682	protein_coding	vav guanine nucleotide exchange factor 2 [Source:HGNC Symbol;Acc:HGNC:12658]	-
ENSG00000137309	234.123	366.558	281.97	307.445	343.147	HMGA1	6	34236873	34246231	+	2327	protein_coding	high mobility group AT-hook 1 [Source:HGNC Symbol;Acc:HGNC:5010]	HMGI/HMGY
ENSG00000119655	96.7627	62.3096	92.9654	77.6694	61.7205	NPC2	14	74476192	74494177	-	2749	protein_coding	NPC intracellular cholesterol transporter 2 [Source:HGNC Symbol;Acc:HGNC:14537]	-
ENSG00000049192	0.338974	1.27673	0.288384	1.05061	1.24875	ADAMTS6	5	65148736	65481920	-	8567	protein_coding	ADAM metallopeptidase with thrombospondin type 1 motif 6 [Source:HGNC Symbol;Acc:HGNC:222]	-
ENSG00000211448	0.196034	0.977142	0.450049	4.43998	3.29488	DIO2	14	80197527	80387757	-	7494	protein_coding	iodothyronine deiodinase 2 [Source:HGNC Symbol;Acc:HGNC:2884]	-
ENSG00000083290	4.01312	2.12754	3.02584	2.17107	2.45285	ULK2	17	19770829	19867936	-	9843	protein_coding	unc-51 like autophagy activating kinase 2 [Source:HGNC Symbol;Acc:HGNC:13480]	-
ENSG00000198795	9.08389	5.24087	13.0882	5.17606	5.85877	ZNF521	18	25061926	25352190	-	6223	protein_coding	zinc finger protein 521 [Source:HGNC Symbol;Acc:HGNC:24605]	zf-C2H2
ENSG00000149782	16.4643	25.5629	13.4717	23.7959	25.704	PLCB3	11	64251523	64269150	+	4964	protein_coding	phospholipase C beta 3 [Source:HGNC Symbol;Acc:HGNC:9056]	-
ENSG00000105202	22.3317	36.306	24.2447	46.4553	31.6001	FBL	19	39834458	39846414	-	2173	protein_coding	fibrillarin [Source:HGNC Symbol;Acc:HGNC:3599]	-
ENSG00000183955	8.7414	14.07	6.76591	14.2437	14.1772	KMT5A	12	123383773	123409358	+	4579	protein_coding	lysine methyltransferase 5A [Source:HGNC Symbol;Acc:HGNC:29489]	-
ENSG00000117450	292.282	200.73	226.457	253.742	203.605	PRDX1	1	45511036	45523047	-	1522	protein_coding	peroxiredoxin 1 [Source:HGNC Symbol;Acc:HGNC:9352]	-
ENSG00000173068	0.769336	1.68563	0.744721	1.36438	1.78578	BNC2	9	16409503	16870843	-	15323	protein_coding	basonuclin 2 [Source:HGNC Symbol;Acc:HGNC:30988]	zf-C2H2
ENSG00000157693	5.17666	2.36491	5.12572	2.60062	2.58015	TMEM268	9	114611206	114646422	+	4792	protein_coding	transmembrane protein 268 [Source:HGNC Symbol;Acc:HGNC:24513]	-
ENSG00000197905	2.39458	6.38866	1.18222	6.49474	5.40259	TEAD4	12	2959330	3040673	+	2272	protein_coding	TEA domain transcription factor 4 [Source:HGNC Symbol;Acc:HGNC:11717]	TEA
ENSG00000047346	5.48039	3.07132	6.41826	2.78825	2.90321	FAM214A	15	52581317	52709817	-	9832	protein_coding	family with sequence similarity 214 member A [Source:HGNC Symbol;Acc:HGNC:25609]	-
ENSG00000139508	2.29255	0.521374	0.707926	0.772101	0.662699	SLC46A3	13	28700064	28718970	-	3776	protein_coding	solute carrier family 46 member 3 [Source:HGNC Symbol;Acc:HGNC:27501]	-
ENSG00000170515	18.8039	29.4716	15.9273	26.5804	28.4657	PA2G4	12	56104319	56113907	+	3795	protein_coding	proliferation-associated 2G4 [Source:HGNC Symbol;Acc:HGNC:8550]	-
ENSG00000162654	0.729254	0.0503466	0.784851	0.0585379	0.0877842	GBP4	1	89181148	89198932	-	6127	protein_coding	guanylate binding protein 4 [Source:HGNC Symbol;Acc:HGNC:20480]	-
ENSG00000127191	3.40847	7.09044	4.15529	8.71377	5.78234	TRAF2	9	136881912	136926607	+	3663	protein_coding	TNF receptor associated factor 2 [Source:HGNC Symbol;Acc:HGNC:12032]	-
ENSG00000070495	2.73522	5.26874	2.16693	5.07217	4.80021	JMJD6	17	76712832	76726799	-	5969	protein_coding	jumonji domain containing 6, arginine demethylase and lysine hydroxylase [Source:HGNC Symbol;Acc:HGNC:19355]	-
ENSG00000137404	7.05329	15.6785	12.4097	13.5907	15.3079	NRM	6	30688047	30691420	-	2045	protein_coding	nurim [Source:HGNC Symbol;Acc:HGNC:8003]	-
ENSG00000111912	3.14224	1.4712	4.40236	1.46075	1.48917	NCOA7	6	125781161	125932030	+	7820	protein_coding	nuclear receptor coactivator 7 [Source:HGNC Symbol;Acc:HGNC:21081]	-
ENSG00000110047	18.494	28.5542	15.2683	29.3696	27.5721	EHD1	11	64851642	64888296	-	7101	protein_coding	EH domain containing 1 [Source:HGNC Symbol;Acc:HGNC:3242]	-
ENSG00000186767	1.26941	3.57611	1.1394	2.31012	3.28657	SPIN4	X	63347228	63351344	-	4117	protein_coding	spindlin family member 4 [Source:HGNC Symbol;Acc:HGNC:27040]	-
ENSG00000102977	4.74847	9.44283	5.53208	8.14303	7.46375	ACD	16	67657512	67660815	-	3223	protein_coding	ACD, shelterin complex subunit and telomerase recruitment factor [Source:HGNC Symbol;Acc:HGNC:25070]	-
ENSG00000126524	51.3348	81.0109	32.7626	88.2508	76.0766	SBDS	7	66987677	66995601	-	1732	protein_coding	SBDS, ribosome maturation factor [Source:HGNC Symbol;Acc:HGNC:19440]	-
ENSG00000167552	175.21	260.746	162.784	261.753	235.166	TUBA1A	12	49184796	49189324	-	3421	protein_coding	tubulin alpha 1a [Source:HGNC Symbol;Acc:HGNC:20766]	-
ENSG00000132470	0.791119	0.108053	1.16371	0.227062	0.12875	ITGB4	17	75721328	75757818	+	6761	protein_coding	integrin subunit beta 4 [Source:HGNC Symbol;Acc:HGNC:6158]	-
ENSG00000006747	0.448276	1.2757	0.791262	1.0302	1.13432	SCIN	7	12570577	12660179	+	11623	protein_coding	scinderin [Source:HGNC Symbol;Acc:HGNC:21695]	-
ENSG00000276547	8.96223	4.11536	9.67602	3.31648	4.98002	PCDHGB5	5	141397987	141512979	+	4851	protein_coding	protocadherin gamma subfamily B, 5 [Source:HGNC Symbol;Acc:HGNC:8712]	-
ENSG00000120699	3.54536	7.25758	3.1348	7.75294	6.45266	EXOSC8	13	36998816	37009613	+	3630	protein_coding	exosome component 8 [Source:HGNC Symbol;Acc:HGNC:17035]	-
ENSG00000172732	5.08715	8.98651	5.81067	9.64085	8.40174	MUS81	11	65857126	65867653	+	5476	protein_coding	MUS81 structure-specific endonuclease subunit [Source:HGNC Symbol;Acc:HGNC:29814]	-
ENSG00000198912	3.85636	7.35926	3.79986	6.25908	6.20669	C1orf174	1	3889125	3900293	-	4388	protein_coding	chromosome 1 open reading frame 174 [Source:HGNC Symbol;Acc:HGNC:27915]	-
ENSG00000106348	23.9719	37.6066	22.8129	40.3649	39.1114	IMPDH1	7	128392277	128410252	-	3662	protein_coding	inosine monophosphate dehydrogenase 1 [Source:HGNC Symbol;Acc:HGNC:6052]	-
ENSG00000113070	1.39013	4.0802	0.524952	5.64918	5.76218	HBEGF	5	140332843	140346631	-	3018	protein_coding	heparin binding EGF like growth factor [Source:HGNC Symbol;Acc:HGNC:3059]	-
ENSG00000111817	7.33993	4.63078	6.3764	5.35372	5.19735	DSE	6	116254173	116444860	+	19193	protein_coding	dermatan sulfate epimerase [Source:HGNC Symbol;Acc:HGNC:21144]	-
ENSG00000225511	2.49542	0.581419	6.26746	1.78506	0.962372	LINC00475	9	92141298	92160114	+	3858	transcribed_unprocessed_pseudogene	long intergenic non-protein coding RNA 475 [Source:HGNC Symbol;Acc:HGNC:23569]	-
ENSG00000181938	0.391502	1.56511	0.349319	1.59092	1.57103	GINS3	16	58295080	58406144	+	5105	protein_coding	GINS complex subunit 3 [Source:HGNC Symbol;Acc:HGNC:25851]	-
ENSG00000152465	6.16509	10.8123	4.84453	9.97785	10.8353	NMT2	10	15102584	15168693	-	4700	protein_coding	N-myristoyltransferase 2 [Source:HGNC Symbol;Acc:HGNC:7858]	-
ENSG00000166317	0.0710583	0.783232	0.0383143	0.847908	0.802979	SYNPO2L	10	73644881	73663803	-	5147	protein_coding	synaptopodin 2 like [Source:HGNC Symbol;Acc:HGNC:23532]	-
ENSG00000164283	0.0247073	1.87874	0.147069	1.29954	1.47199	ESM1	5	54977864	55022671	-	2695	protein_coding	endothelial cell specific molecule 1 [Source:HGNC Symbol;Acc:HGNC:3466]	-
ENSG00000178966	1.76679	5.2517	2.03181	3.92654	4.76552	RMI1	9	83980711	84004074	+	3507	protein_coding	RecQ mediated genome instability 1 [Source:HGNC Symbol;Acc:HGNC:25764]	-
ENSG00000198682	35.2951	50.9464	35.5953	41.6016	51.3136	PAPSS2	10	87659613	87747705	+	4083	protein_coding	3'-phosphoadenosine 5'-phosphosulfate synthase 2 [Source:HGNC Symbol;Acc:HGNC:8604]	-
ENSG00000149150	3.15484	6.69914	5.09637	6.57352	6.52637	SLC43A1	11	57484534	57515786	-	3532	protein_coding	solute carrier family 43 member 1 [Source:HGNC Symbol;Acc:HGNC:9225]	-
ENSG00000182087	78.8062	53.5282	68.8239	58.7583	55.5256	TMEM259	19	1009648	1021179	-	4031	protein_coding	transmembrane protein 259 [Source:HGNC Symbol;Acc:HGNC:17039]	-
ENSG00000151320	0.525874	0.147426	0.193748	0.242521	0.366036	AKAP6	14	32329273	32837681	+	19748	protein_coding	A-kinase anchoring protein 6 [Source:HGNC Symbol;Acc:HGNC:376]	-
ENSG00000282057	0.208138	1.47053	0.193862	1.45082	1.31297	AC092807.3	1	85482281	85578250	-	3607	lincRNA	novel transcript	-
ENSG00000166016	10.3472	5.55445	11.4295	5.50884	6.26195	ABTB2	11	34150988	34358008	-	4973	protein_coding	ankyrin repeat and BTB domain containing 2 [Source:HGNC Symbol;Acc:HGNC:23842]	-
ENSG00000139625	9.15565	5.419	16.1118	4.937	4.92434	MAP3K12	12	53479669	53500063	-	7971	protein_coding	mitogen-activated protein kinase kinase kinase 12 [Source:HGNC Symbol;Acc:HGNC:6851]	-
ENSG00000146909	3.01568	5.42211	2.68804	4.78249	5.61632	NOM1	7	156949723	156973182	+	7788	protein_coding	nucleolar protein with MIF4G domain 1 [Source:HGNC Symbol;Acc:HGNC:13244]	-
ENSG00000102900	5.14153	7.89035	3.84117	7.33118	7.56141	NUP93	16	56730105	56850286	+	11136	protein_coding	nucleoporin 93 [Source:HGNC Symbol;Acc:HGNC:28958]	-
ENSG00000125826	39.8319	25.8478	36.98	27.0132	25.6901	RBCK1	20	407498	430966	+	4024	protein_coding	RANBP2-type and C3HC4-type zinc finger containing 1 [Source:HGNC Symbol;Acc:HGNC:15864]	-
ENSG00000063322	21.6006	13.0238	17.2429	13.676	13.1676	MED29	19	39391303	39400637	+	3835	protein_coding	mediator complex subunit 29 [Source:HGNC Symbol;Acc:HGNC:23074]	-
ENSG00000198715	31.3519	19.5637	35.3181	14.5894	16.8088	GLMP	1	156290089	156295689	-	3471	protein_coding	glycosylated lysosomal membrane protein [Source:HGNC Symbol;Acc:HGNC:29436]	NCU-G1
ENSG00000100129	34.4767	22.7426	33.6032	18.9478	23.3774	EIF3L	22	37848868	37889407	+	4296	protein_coding	eukaryotic translation initiation factor 3 subunit L [Source:HGNC Symbol;Acc:HGNC:18138]	-
ENSG00000106483	0.110859	1.11491	0.156133	1.24588	1.13393	SFRP4	7	37905932	38025695	-	3606	protein_coding	secreted frizzled related protein 4 [Source:HGNC Symbol;Acc:HGNC:10778]	-
ENSG00000144230	0.218141	1.81156	0.335736	1.47692	1.73939	GPR17	2	127645864	127652639	+	2671	protein_coding	G protein-coupled receptor 17 [Source:HGNC Symbol;Acc:HGNC:4471]	-
ENSG00000258947	1.14642	0.137461	0.777634	0.354978	0.3246	TUBB3	16	89921392	89938761	+	4430	protein_coding	tubulin beta 3 class III [Source:HGNC Symbol;Acc:HGNC:20772]	-
ENSG00000115226	13.969	6.77092	12.4708	6.46575	6.56254	FNDC4	2	27491883	27495245	-	1982	protein_coding	fibronectin type III domain containing 4 [Source:HGNC Symbol;Acc:HGNC:20239]	-
ENSG00000136869	1.94519	0.820376	1.52294	0.913379	1.09045	TLR4	9	117704175	117724730	+	13272	protein_coding	toll like receptor 4 [Source:HGNC Symbol;Acc:HGNC:11850]	-
ENSG00000122565	22.1963	34.8549	26.8305	38.4172	33.0571	CBX3	7	26201162	26213356	+	4641	protein_coding	chromobox 3 [Source:HGNC Symbol;Acc:HGNC:1553]	-
ENSG00000076356	0.344582	0.973927	0.396752	0.7008	0.976647	PLXNA2	1	208022242	208244320	-	13781	protein_coding	plexin A2 [Source:HGNC Symbol;Acc:HGNC:9100]	-
ENSG00000148516	3.97042	6.66576	5.07026	5.41024	7.17401	ZEB1	10	31318495	31529814	+	8650	protein_coding	zinc finger E-box binding homeobox 1 [Source:HGNC Symbol;Acc:HGNC:11642]	zf-C2H2
ENSG00000101337	28.5993	18.6035	28.759	16.572	19.4283	TM9SF4	20	32109506	32167258	+	5415	protein_coding	transmembrane 9 superfamily member 4 [Source:HGNC Symbol;Acc:HGNC:30797]	-
ENSG00000165246	3.18519	1.4973	3.05259	1.80836	1.93491	NLGN4Y	Y	14522573	14845650	+	8589	protein_coding	neuroligin 4 Y-linked [Source:HGNC Symbol;Acc:HGNC:15529]	-
ENSG00000055044	10.5103	17.5797	7.69571	18.363	17.4017	NOP58	2	202265716	202303666	+	3299	protein_coding	NOP58 ribonucleoprotein [Source:HGNC Symbol;Acc:HGNC:29926]	-
ENSG00000164305	7.63289	14.0503	5.88234	13.4555	13.9229	CASP3	4	184627696	184649509	-	2899	protein_coding	caspase 3 [Source:HGNC Symbol;Acc:HGNC:1504]	-
ENSG00000184678	9.78839	4.28125	6.89176	2.99262	4.26613	HIST2H2BE	1	149884459	149886652	-	2194	protein_coding	histone cluster 2 H2B family member e [Source:HGNC Symbol;Acc:HGNC:4760]	-
ENSG00000172260	1.49901	2.79706	1.46021	2.20197	2.98691	NEGR1	1	71395940	72282734	-	13406	protein_coding	neuronal growth regulator 1 [Source:HGNC Symbol;Acc:HGNC:17302]	-
ENSG00000074047	4.68186	8.42354	5.16285	7.41554	9.73158	GLI2	2	120735623	120992653	+	7341	protein_coding	GLI family zinc finger 2 [Source:HGNC Symbol;Acc:HGNC:4318]	zf-C2H2
ENSG00000187446	43.914	28.2955	35.6874	26.6024	29.6218	CHP1	15	41230839	41281890	+	3950	protein_coding	calcineurin like EF-hand protein 1 [Source:HGNC Symbol;Acc:HGNC:17433]	-
ENSG00000139926	77.4103	106.406	81.3976	112.755	131.16	FRMD6	14	51489100	51730727	+	9416	protein_coding	FERM domain containing 6 [Source:HGNC Symbol;Acc:HGNC:19839]	-
ENSG00000080709	0.473242	1.71416	0.401386	0.976575	1.46316	KCNN2	5	114055545	114496500	+	6489	protein_coding	potassium calcium-activated channel subfamily N member 2 [Source:HGNC Symbol;Acc:HGNC:6291]	-
ENSG00000189339	10.6506	6.37717	13.12	5.6901	6.95707	SLC35E2B	1	1659529	1692728	-	8395	protein_coding	solute carrier family 35 member E2B [Source:HGNC Symbol;Acc:HGNC:33941]	-
ENSG00000178573	3.23225	1.50165	3.68304	1.91282	1.83036	MAF	16	79585843	79600714	-	6976	protein_coding	MAF bZIP transcription factor [Source:HGNC Symbol;Acc:HGNC:6776]	TF_bZIP
ENSG00000129675	5.24341	2.66568	4.21663	2.57972	3.33493	ARHGEF6	X	136665547	136782088	-	6434	protein_coding	Rac/Cdc42 guanine nucleotide exchange factor 6 [Source:HGNC Symbol;Acc:HGNC:685]	-
ENSG00000112759	2.42546	5.08099	3.05138	4.16053	4.30183	SLC29A1	6	44219505	44234151	+	4408	protein_coding	solute carrier family 29 member 1 (Augustine blood group) [Source:HGNC Symbol;Acc:HGNC:11003]	-
ENSG00000128944	3.88154	7.70133	2.81086	5.61721	6.84273	KNSTRN	15	40382721	40394246	+	3654	protein_coding	kinetochore localized astrin (SPAG5) binding protein [Source:HGNC Symbol;Acc:HGNC:30767]	-
ENSG00000141401	2.48944	5.57816	2.92627	7.51278	5.18132	IMPA2	18	11981025	12030883	+	3825	protein_coding	inositol monophosphatase 2 [Source:HGNC Symbol;Acc:HGNC:6051]	-
ENSG00000189306	7.29761	13.1487	6.64272	16.4546	12.027	RRP7A	22	42509968	42519802	-	4082	protein_coding	ribosomal RNA processing 7 homolog A [Source:HGNC Symbol;Acc:HGNC:24286]	-
ENSG00000042088	1.42454	3.29321	1.78356	2.60557	2.92964	TDP1	14	89954939	90044768	+	6227	protein_coding	tyrosyl-DNA phosphodiesterase 1 [Source:HGNC Symbol;Acc:HGNC:18884]	-
ENSG00000073060	19.1225	11.356	37.6135	16.2663	13.1814	SCARB1	12	124776856	124882668	-	7741	protein_coding	scavenger receptor class B member 1 [Source:HGNC Symbol;Acc:HGNC:1664]	-
ENSG00000160633	10.7216	16.7783	13.33	19.9164	14.9453	SAFB	19	5623035	5668478	+	7036	protein_coding	scaffold attachment factor B [Source:HGNC Symbol;Acc:HGNC:10520]	-
ENSG00000095739	5.0358	1.57119	7.26883	2.41781	1.5487	BAMBI	10	28677342	28682939	+	2314	protein_coding	BMP and activin membrane bound inhibitor [Source:HGNC Symbol;Acc:HGNC:30251]	-
ENSG00000268592	15.319	5.83472	9.12953	4.0704	7.23323	RAET1E-AS1	6	149863494	149919507	+	1210	antisense	RAET1E antisense RNA 1 [Source:NCBI gene;Acc:100652739]	-
ENSG00000169710	169.161	96.3632	117.111	56.246	102.08	FASN	17	82078333	82098332	-	9364	protein_coding	fatty acid synthase [Source:HGNC Symbol;Acc:HGNC:3594]	-
ENSG00000160888	5.92369	11.2827	8.13073	12.5926	10.3337	IER2	19	13150415	13154908	+	3072	protein_coding	immediate early response 2 [Source:HGNC Symbol;Acc:HGNC:28871]	-
ENSG00000138449	1.16223	0.153736	1.80357	0.379046	0.266592	SLC40A1	2	189560579	189583758	-	4330	protein_coding	solute carrier family 40 member 1 [Source:HGNC Symbol;Acc:HGNC:10909]	-
ENSG00000163655	7.0194	10.5687	5.97481	9.95911	9.75142	GMPS	3	155870536	155944026	+	8885	protein_coding	guanine monophosphate synthase [Source:HGNC Symbol;Acc:HGNC:4378]	-
ENSG00000145348	3.52001	1.87156	2.99415	1.64627	2.17754	TBCK	4	106041599	106321495	-	11112	protein_coding	TBC1 domain containing kinase [Source:HGNC Symbol;Acc:HGNC:28261]	-
ENSG00000226137	6.35372	3.11158	8.17601	3.15489	3.37406	BAIAP2-DT	17	81029130	81034881	-	4773	lincRNA	BAIAP2 divergent transcript [Source:HGNC Symbol;Acc:HGNC:44342]	-
ENSG00000140848	3.62495	6.48944	4.67798	5.70399	6.03231	CPNE2	16	57092537	57148367	+	7781	protein_coding	copine 2 [Source:HGNC Symbol;Acc:HGNC:2315]	-
ENSG00000106012	7.48932	4.40731	5.57569	4.30076	4.74807	IQCE	7	2558972	2614734	+	9240	protein_coding	IQ motif containing E [Source:HGNC Symbol;Acc:HGNC:29171]	-
ENSG00000165617	2.53848	0.830978	3.22809	1.27357	1.32004	DACT1	14	58633967	58648321	+	4490	protein_coding	dishevelled binding antagonist of beta catenin 1 [Source:HGNC Symbol;Acc:HGNC:17748]	-
ENSG00000106538	25.9862	49.0998	55.3084	99.4855	42.3981	RARRES2	7	150338317	150341674	-	1921	protein_coding	retinoic acid receptor responder 2 [Source:HGNC Symbol;Acc:HGNC:9868]	-
ENSG00000080845	14.6797	21.3942	19.3985	19.9028	23.3605	DLGAP4	20	36306336	36528637	+	8789	protein_coding	DLG associated protein 4 [Source:HGNC Symbol;Acc:HGNC:24476]	-
ENSG00000095752	3.984	9.39478	8.30116	13.2887	11.6885	IL11	19	55364389	55370463	-	2671	protein_coding	interleukin 11 [Source:HGNC Symbol;Acc:HGNC:5966]	-
ENSG00000080345	2.04396	3.77768	2.102	2.97606	3.92967	RIF1	2	151409883	151508013	+	18166	protein_coding	replication timing regulatory factor 1 [Source:HGNC Symbol;Acc:HGNC:23207]	-
ENSG00000163683	12.3084	6.55999	11.2492	8.18077	8.3519	SMIM14	4	39546330	39639090	-	6721	protein_coding	small integral membrane protein 14 [Source:HGNC Symbol;Acc:HGNC:27321]	-
ENSG00000099204	3.12809	1.56772	3.39279	1.9047	2.2318	ABLIM1	10	114431113	114685003	-	10039	protein_coding	actin binding LIM protein 1 [Source:HGNC Symbol;Acc:HGNC:78]	-
ENSG00000196262	133.487	190.987	139.036	238.256	167.928	PPIA	7	44796680	44824564	+	4432	protein_coding	peptidylprolyl isomerase A [Source:HGNC Symbol;Acc:HGNC:9253]	-
ENSG00000110721	10.3432	5.48295	6.0823	5.62287	5.93414	CHKA	11	68052859	68121444	-	3877	protein_coding	choline kinase alpha [Source:HGNC Symbol;Acc:HGNC:1937]	-
ENSG00000105289	1.02401	0.0409461	1.02576	0.0686698	0.0200127	TJP3	19	3708109	3750813	+	4217	protein_coding	tight junction protein 3 [Source:HGNC Symbol;Acc:HGNC:11829]	-
ENSG00000178773	26.6438	41.5794	40.4339	41.8939	38.3403	CPNE7	16	89575768	89597246	+	3048	protein_coding	copine 7 [Source:HGNC Symbol;Acc:HGNC:2320]	-
ENSG00000257167	0.064275	1.06847	0.21384	0.918647	0.898079	TMPO-AS1	12	98512973	98516422	-	3357	antisense	TMPO antisense RNA 1 [Source:HGNC Symbol;Acc:HGNC:44158]	-
ENSG00000189184	15.7631	23.2383	28.1075	22.0066	23.8031	PCDH18	4	137518918	137532494	-	6686	protein_coding	protocadherin 18 [Source:HGNC Symbol;Acc:HGNC:14268]	-
ENSG00000107372	37.7526	26.2392	46.4049	28.9214	33.1667	ZFAND5	9	72351425	72365235	-	7053	protein_coding	zinc finger AN1-type containing 5 [Source:HGNC Symbol;Acc:HGNC:13008]	-
ENSG00000068001	24.0282	14.4469	22.6723	19.1301	15.1637	HYAL2	3	50317790	50322906	-	4545	protein_coding	hyaluronoglucosaminidase 2 [Source:HGNC Symbol;Acc:HGNC:5321]	-
ENSG00000140511	3.43535	1.17831	1.7893	2.41352	1.86589	HAPLN3	15	88877288	88895626	-	3524	protein_coding	hyaluronan and proteoglycan link protein 3 [Source:HGNC Symbol;Acc:HGNC:21446]	-
ENSG00000116017	4.59633	7.55823	6.27986	6.76552	6.59799	ARID3A	19	925781	975934	+	7210	protein_coding	AT-rich interaction domain 3A [Source:HGNC Symbol;Acc:HGNC:3031]	ARID
ENSG00000277117	2.67481	0.494887	2.63996	0.380346	0.352363	FP565260.3	21	5022493	5040666	+	3357	protein_coding	Homo sapiens ICOS ligand (LOC102723996), mRNA. [Source:RefSeq mRNA;Acc:NM_001363770]	-
ENSG00000175832	2.21766	5.12271	3.19503	4.30696	4.75537	ETV4	17	43527844	43579620	-	3607	protein_coding	ETS variant 4 [Source:HGNC Symbol;Acc:HGNC:3493]	ETS
ENSG00000240065	4.87951	1.78956	5.1588	4.17423	2.24315	PSMB9	6	32844136	32859585	+	3072	protein_coding	proteasome subunit beta 9 [Source:HGNC Symbol;Acc:HGNC:9546]	-
ENSG00000146676	5.82149	9.09069	5.37111	8.45342	10.1855	PURB	7	44876293	44885361	-	9069	protein_coding	purine rich element binding protein B [Source:HGNC Symbol;Acc:HGNC:9702]	Others
ENSG00000103512	47.9197	33.0429	51.9325	28.5852	33.7148	NOMO1	16	14833681	14896160	+	5819	protein_coding	NODAL modulator 1 [Source:HGNC Symbol;Acc:HGNC:30060]	-
ENSG00000178921	4.23197	7.68594	3.2863	5.98156	7.59073	PFAS	17	8247618	8270491	+	6471	protein_coding	phosphoribosylformylglycinamidine synthase [Source:HGNC Symbol;Acc:HGNC:8863]	-
ENSG00000127241	6.37976	10.4744	13.9835	17.6782	15.2215	MASP1	3	187217285	187292022	-	13161	protein_coding	mannan binding lectin serine peptidase 1 [Source:HGNC Symbol;Acc:HGNC:6901]	-
ENSG00000136802	23.7489	36.2797	25.2304	30.4285	37.5405	LRRC8A	9	128882112	128918039	+	5230	protein_coding	leucine rich repeat containing 8 VRAC subunit A [Source:HGNC Symbol;Acc:HGNC:19027]	-
ENSG00000147874	2.64073	4.96858	2.70945	3.76579	5.19587	HAUS6	9	19053143	19103119	-	7932	protein_coding	HAUS augmin like complex subunit 6 [Source:HGNC Symbol;Acc:HGNC:25948]	-
ENSG00000137135	0.141296	0.824938	0.126766	0.511052	0.647794	ARHGEF39	9	35658875	35675866	-	6496	protein_coding	Rho guanine nucleotide exchange factor 39 [Source:HGNC Symbol;Acc:HGNC:25909]	-
ENSG00000173156	29.427	15.3196	27.4347	22.1778	13.7192	RHOD	11	67056818	67072013	+	1265	protein_coding	ras homolog family member D [Source:HGNC Symbol;Acc:HGNC:670]	-
ENSG00000164463	2.59966	1.36474	3.86257	1.03282	1.21263	CREBRF	5	173056352	173139284	+	12333	protein_coding	CREB3 regulatory factor [Source:HGNC Symbol;Acc:HGNC:24050]	-
ENSG00000125304	50.201	35.2362	49.5638	35.3078	37.495	TM9SF2	13	99446311	99564006	+	5524	protein_coding	transmembrane 9 superfamily member 2 [Source:HGNC Symbol;Acc:HGNC:11865]	-
ENSG00000198380	14.8622	22.9509	16.4198	22.6326	24.5069	GFPT1	2	69319769	69387254	-	8866	protein_coding	glutamine--fructose-6-phosphate transaminase 1 [Source:HGNC Symbol;Acc:HGNC:4241]	-
ENSG00000109103	9.44303	5.19026	8.56711	5.50964	5.02029	UNC119	17	28546707	28552668	-	5128	protein_coding	unc-119 lipid binding chaperone [Source:HGNC Symbol;Acc:HGNC:12565]	-
ENSG00000184988	1.47774	3.84976	1.5511	3.84777	4.2124	TMEM106A	17	43211835	43220041	+	3577	protein_coding	transmembrane protein 106A [Source:HGNC Symbol;Acc:HGNC:28288]	-
ENSG00000026025	406.702	611.877	609.25	717.532	597.502	VIM	10	17228259	17237593	+	5158	protein_coding	vimentin [Source:HGNC Symbol;Acc:HGNC:12692]	-
ENSG00000106415	3.52568	1.51814	2.74204	1.23737	1.49992	GLCCI1	7	7968794	8094272	+	6885	protein_coding	glucocorticoid induced 1 [Source:HGNC Symbol;Acc:HGNC:18713]	-
ENSG00000185298	9.63716	16.5134	7.67049	19.4314	14.4769	CCDC137	17	81666364	81673904	+	2762	protein_coding	coiled-coil domain containing 137 [Source:HGNC Symbol;Acc:HGNC:33451]	-
ENSG00000168264	28.5707	18.0248	34.4728	18.8063	20.8212	IRF2BP2	1	234604269	234609525	-	4724	protein_coding	interferon regulatory factor 2 binding protein 2 [Source:HGNC Symbol;Acc:HGNC:21729]	-
ENSG00000163344	8.96705	18.1252	10.5852	24.2353	14.4767	PMVK	1	154924734	154936991	-	1280	protein_coding	phosphomevalonate kinase [Source:HGNC Symbol;Acc:HGNC:9141]	-
ENSG00000157873	7.70503	4.30325	13.7144	4.90636	3.83204	TNFRSF14	1	2555639	2565382	+	6219	protein_coding	TNF receptor superfamily member 14 [Source:HGNC Symbol;Acc:HGNC:11912]	-
ENSG00000070540	22.2528	14.0652	19.8864	11.8695	15.6403	WIPI1	17	68420948	68457513	-	3402	protein_coding	WD repeat domain, phosphoinositide interacting 1 [Source:HGNC Symbol;Acc:HGNC:25471]	-
ENSG00000205937	12.1901	17.7517	11.6195	16.9774	17.9076	RNPS1	16	2253116	2268412	-	8582	protein_coding	RNA binding protein with serine rich domain 1 [Source:HGNC Symbol;Acc:HGNC:10080]	-
ENSG00000183814	0.596165	2.33632	0.686936	1.88158	2.15805	LIN9	1	226231149	226309869	-	4442	protein_coding	lin-9 DREAM MuvB core complex component [Source:HGNC Symbol;Acc:HGNC:30830]	-
ENSG00000112159	1.22491	2.50674	1.26745	2.03143	2.59773	MDN1	6	89642499	89819723	-	18602	protein_coding	midasin AAA ATPase 1 [Source:HGNC Symbol;Acc:HGNC:18302]	-
ENSG00000105825	10.4743	4.99445	10.8163	5.50673	5.18981	TFPI2	7	93885396	93890991	-	2682	protein_coding	tissue factor pathway inhibitor 2 [Source:HGNC Symbol;Acc:HGNC:11761]	-
ENSG00000039068	2.00498	0.00308327	3.11819	0	0.0109241	CDH1	16	68737225	68835548	+	6177	protein_coding	cadherin 1 [Source:HGNC Symbol;Acc:HGNC:1748]	-
ENSG00000102871	30.3508	17.2271	34.1678	33.7804	20.0654	TRADD	16	67154180	67160298	-	2567	protein_coding	TNFRSF1A associated via death domain [Source:HGNC Symbol;Acc:HGNC:12030]	-
ENSG00000254245	3.38028	1.35657	3.64726	1.14355	1.72423	PCDHGA3	5	141343829	141512979	+	4876	protein_coding	protocadherin gamma subfamily A, 3 [Source:HGNC Symbol;Acc:HGNC:8701]	-
ENSG00000142864	34.0445	46.9223	29.1931	46.5131	45.8045	SERBP1	1	67407810	67430415	-	7676	protein_coding	SERPINE1 mRNA binding protein 1 [Source:HGNC Symbol;Acc:HGNC:17860]	-
ENSG00000114450	4.59848	8.35851	4.53436	7.03774	8.45731	GNB4	3	179396089	179451590	-	7035	protein_coding	G protein subunit beta 4 [Source:HGNC Symbol;Acc:HGNC:20731]	-
ENSG00000184162	1.96617	6.01018	2.02383	5.62855	4.45637	NR2C2AP	19	19201416	19203424	-	1794	protein_coding	nuclear receptor 2C2 associated protein [Source:HGNC Symbol;Acc:HGNC:30763]	-
ENSG00000153179	2.1995	4.71756	2.71394	4.07197	5.02188	RASSF3	12	64507001	64697567	+	4226	protein_coding	Ras association domain family member 3 [Source:HGNC Symbol;Acc:HGNC:14271]	-
ENSG00000147676	1.99804	0	2.1681	0	0	MAL2	8	119165034	119245673	+	3430	protein_coding	mal, T cell differentiation protein 2 (gene/pseudogene) [Source:HGNC Symbol;Acc:HGNC:13634]	-
ENSG00000144283	1.80965	3.38044	1.24691	2.95982	3.66397	PKP4	2	158456964	158682879	+	9525	protein_coding	plakophilin 4 [Source:HGNC Symbol;Acc:HGNC:9026]	-
ENSG00000163513	65.281	44.5433	49.4575	36.4892	47.1046	TGFBR2	3	30606502	30694142	+	4704	protein_coding	transforming growth factor beta receptor 2 [Source:HGNC Symbol;Acc:HGNC:11773]	-
ENSG00000213719	183.89	285.71	196.225	364.581	258.975	CLIC1	6	31730581	31739763	-	1942	protein_coding	chloride intracellular channel 1 [Source:HGNC Symbol;Acc:HGNC:2062]	-
ENSG00000259426	0.595499	2.71818	0.476501	2.81799	2.52625	AC027237.3	15	69396904	69415029	-	2265	antisense	uncharacterized LOC145694 [Source:NCBI gene;Acc:145694]	-
ENSG00000128408	0.109652	1.98043	0.219852	1.2456	1.69576	RIBC2	22	45413691	45432496	+	1815	protein_coding	RIB43A domain with coiled-coils 2 [Source:HGNC Symbol;Acc:HGNC:13241]	-
ENSG00000166451	2.87771	6.44803	1.51646	5.10815	5.90643	CENPN	16	81006498	81033114	+	3568	protein_coding	centromere protein N [Source:HGNC Symbol;Acc:HGNC:30873]	-
ENSG00000010704	6.40132	3.4828	7.22941	3.64088	4.38496	HFE	6	26087281	26098343	+	5675	protein_coding	homeostatic iron regulator [Source:HGNC Symbol;Acc:HGNC:4886]	-
ENSG00000095002	1.63104	3.05846	1.43078	2.28318	2.99883	MSH2	2	47402969	47663146	+	13777	protein_coding	mutS homolog 2 [Source:HGNC Symbol;Acc:HGNC:7325]	-
ENSG00000111540	33.4747	22.4347	31.1859	17.3461	23.1759	RAB5B	12	55973913	55996683	+	6588	protein_coding	RAB5B, member RAS oncogene family [Source:HGNC Symbol;Acc:HGNC:9784]	-
ENSG00000130766	15.3896	8.8672	15.177	7.63189	8.34843	SESN2	1	28259527	28282491	+	3453	protein_coding	sestrin 2 [Source:HGNC Symbol;Acc:HGNC:20746]	-
ENSG00000162923	20.8227	13.891	22.4627	14.0145	16.3305	WDR26	1	224385143	224437033	-	10976	protein_coding	WD repeat domain 26 [Source:HGNC Symbol;Acc:HGNC:21208]	-
ENSG00000125898	1.4813	4.37851	2.42596	5.14044	3.92812	FAM110A	20	833715	857463	+	2722	protein_coding	family with sequence similarity 110 member A [Source:HGNC Symbol;Acc:HGNC:16188]	-
ENSG00000172935	15.0371	27.2995	23.3876	31.9681	26.1153	MRGPRF	11	69004395	69013409	-	2746	protein_coding	MAS related GPR family member F [Source:HGNC Symbol;Acc:HGNC:24828]	-
ENSG00000140465	2.92977	0.0126173	2.11459	0.0374875	0.0299654	CYP1A1	15	74719542	74725610	-	3435	protein_coding	cytochrome P450 family 1 subfamily A member 1 [Source:HGNC Symbol;Acc:HGNC:2595]	-
ENSG00000128833	0.414981	0.0148123	0.328823	0.0103531	0.00587296	MYO5C	15	52192322	52295798	-	10045	protein_coding	myosin VC [Source:HGNC Symbol;Acc:HGNC:7604]	-
ENSG00000108582	37.2331	23.6113	34.3901	21.8266	28.6044	CPD	17	30378905	30469989	+	12532	protein_coding	carboxypeptidase D [Source:HGNC Symbol;Acc:HGNC:2301]	-
ENSG00000168785	11.9616	17.5484	9.43673	14.066	17.9057	TSPAN5	4	98470367	98658629	-	7430	protein_coding	tetraspanin 5 [Source:HGNC Symbol;Acc:HGNC:17753]	-
ENSG00000128059	1.97521	4.14513	1.44008	3.81534	4.48005	PPAT	4	56393362	56435615	-	5439	protein_coding	phosphoribosyl pyrophosphate amidotransferase [Source:HGNC Symbol;Acc:HGNC:9238]	-
ENSG00000133318	35.1688	23.9758	27.585	23.6594	24.1705	RTN3	11	63681446	63759891	+	5792	protein_coding	reticulon 3 [Source:HGNC Symbol;Acc:HGNC:10469]	-
ENSG00000167642	2.2727	0.0363173	2.83306	0.0762625	0.0382219	SPINT2	19	38244035	38292614	+	5199	protein_coding	serine peptidase inhibitor, Kunitz type 2 [Source:HGNC Symbol;Acc:HGNC:11247]	-
ENSG00000031691	1.53813	5.26552	1.59883	4.64807	4.10362	CENPQ	6	49463378	49493107	+	1733	protein_coding	centromere protein Q [Source:HGNC Symbol;Acc:HGNC:21347]	-
ENSG00000171700	5.14241	11.1121	7.81066	12.924	11.0879	RGS19	20	64073181	64079988	-	2028	protein_coding	regulator of G protein signaling 19 [Source:HGNC Symbol;Acc:HGNC:13735]	-
ENSG00000198053	21.5939	30.8782	28.7308	26.8356	31.1359	SIRPA	20	1894167	1940592	+	5068	protein_coding	signal regulatory protein alpha [Source:HGNC Symbol;Acc:HGNC:9662]	-
ENSG00000182575	0.0912851	0.768575	0.300748	0.990799	0.63147	NXPH3	17	49575858	49583827	+	5648	protein_coding	neurexophilin 3 [Source:HGNC Symbol;Acc:HGNC:8077]	-
ENSG00000214063	20.9993	31.1402	26.6555	32.0387	29.1617	TSPAN4	11	842808	867116	+	5841	protein_coding	tetraspanin 4 [Source:HGNC Symbol;Acc:HGNC:11859]	-
ENSG00000272398	1.64057	0.25349	2.77264	0.299092	0.266022	CD24	6	106969831	106975627	-	3097	protein_coding	CD24 molecule [Source:HGNC Symbol;Acc:HGNC:1645]	-
ENSG00000180447	1.53765	4.27742	1.55189	3.53058	3.65744	GAS1	9	86944363	86947189	-	2827	protein_coding	growth arrest specific 1 [Source:HGNC Symbol;Acc:HGNC:4165]	-
ENSG00000106546	7.3069	4.12026	8.32729	6.37346	5.51773	AHR	7	16916359	17346152	+	8081	protein_coding	aryl hydrocarbon receptor [Source:HGNC Symbol;Acc:HGNC:348]	bHLH
ENSG00000048471	6.02268	3.31375	5.6514	3.16832	3.80622	SNX29	16	11976737	12574289	+	11298	protein_coding	sorting nexin 29 [Source:HGNC Symbol;Acc:HGNC:30542]	-
ENSG00000172345	1.62945	0.521253	1.98624	1.14256	0.716554	STARD5	15	81309053	81324183	-	6339	protein_coding	StAR related lipid transfer domain containing 5 [Source:HGNC Symbol;Acc:HGNC:18065]	-
ENSG00000105373	27.7151	16.0323	35.5303	27.3272	15.9191	NOP53	19	47745522	47757058	+	5341	protein_coding	NOP53 ribosome biogenesis factor [Source:HGNC Symbol;Acc:HGNC:4333]	-
ENSG00000162825	0.175711	0.567537	0.201025	0.560922	0.496107	NBPF20	1	145289900	145405778	-	18995	protein_coding	NBPF member 20 [Source:HGNC Symbol;Acc:HGNC:32000]	-
ENSG00000185033	6.78244	3.39177	22.8465	3.64452	4.13059	SEMA4B	15	90160604	90229679	+	7006	protein_coding	semaphorin 4B [Source:HGNC Symbol;Acc:HGNC:10730]	-
ENSG00000100439	12.0629	7.14597	11.7414	7.73123	8.0454	ABHD4	14	22598237	22613215	+	4070	protein_coding	abhydrolase domain containing 4 [Source:HGNC Symbol;Acc:HGNC:20154]	-
ENSG00000173638	1.24565	2.60224	1.91325	2.46676	2.39702	SLC19A1	21	45493572	45544411	-	9998	protein_coding	solute carrier family 19 member 1 [Source:HGNC Symbol;Acc:HGNC:10937]	-
ENSG00000152117	4.92757	8.99592	8.54525	8.35349	8.0594	AC073869.1	2	131492813	131521573	+	3914	transcribed_processed_pseudogene	sphingomyelin phosphodiesterase 4, neutral membrane (neutral sphingomyelinase-3) pseudogene [Source:NCBI gene;Acc:150776]	-
ENSG00000140526	9.94106	5.42312	6.79407	4.98963	6.36707	ABHD2	15	89087459	89202360	+	10345	protein_coding	abhydrolase domain containing 2 [Source:HGNC Symbol;Acc:HGNC:18717]	-
ENSG00000231924	0.358974	1.61018	0.659433	1.67624	1.5826	PSG1	19	42866464	42879822	-	4961	protein_coding	pregnancy specific beta-1-glycoprotein 1 [Source:HGNC Symbol;Acc:HGNC:9514]	-
ENSG00000114650	28.7977	19.6171	22.8125	22.1795	19.17	SCAP	3	47413694	47477126	-	6433	protein_coding	SREBF chaperone [Source:HGNC Symbol;Acc:HGNC:30634]	-
ENSG00000087842	4.80265	1.61365	5.01683	3.52856	2.43384	PIR	X	15384799	15493564	-	2512	protein_coding	pirin [Source:HGNC Symbol;Acc:HGNC:30048]	-
ENSG00000111696	1.61918	3.0532	1.62033	2.36126	2.58742	NT5DC3	12	103770453	103841197	-	8722	protein_coding	5'-nucleotidase domain containing 3 [Source:HGNC Symbol;Acc:HGNC:30826]	-
ENSG00000049759	1.02068	2.01654	1.29687	1.38119	1.71287	NEDD4L	18	58044367	58401540	+	17455	protein_coding	neural precursor cell expressed, developmentally down-regulated 4-like, E3 ubiquitin protein ligase [Source:HGNC Symbol;Acc:HGNC:7728]	-
ENSG00000011243	11.9712	7.12486	12.5316	8.75103	7.45602	AKAP8L	19	15380048	15419141	-	5081	protein_coding	A-kinase anchoring protein 8 like [Source:HGNC Symbol;Acc:HGNC:29857]	-
ENSG00000077312	13.7095	24.6619	17.3644	27.2305	22.9792	SNRPA	19	40750637	40765389	+	2361	protein_coding	small nuclear ribonucleoprotein polypeptide A [Source:HGNC Symbol;Acc:HGNC:11151]	-
ENSG00000123159	38.08	55.3997	26.6439	66.5193	51.1766	GIPC1	19	14477760	14496149	-	4440	protein_coding	GIPC PDZ domain containing family member 1 [Source:HGNC Symbol;Acc:HGNC:1226]	-
ENSG00000177406	2.46212	0.679745	2.08213	1.12777	0.874845	AC021054.1	12	630891	663706	+	3530	antisense	uncharacterized LOC100049716 [Source:NCBI gene;Acc:100049716]	-
ENSG00000160691	147.203	99.3456	139.308	89.2739	104.783	SHC1	1	154962298	154974395	-	4342	protein_coding	SHC adaptor protein 1 [Source:HGNC Symbol;Acc:HGNC:10840]	-
ENSG00000276600	6.89524	3.45297	6.32226	5.0727	4.08237	RAB7B	1	205976740	206003461	-	3686	protein_coding	RAB7B, member RAS oncogene family [Source:HGNC Symbol;Acc:HGNC:30513]	-
ENSG00000163728	6.33726	3.34549	3.88626	3.39857	3.56374	TTC14	3	180602130	180617828	+	7783	protein_coding	tetratricopeptide repeat domain 14 [Source:HGNC Symbol;Acc:HGNC:24697]	-
ENSG00000142949	14.2351	22.0112	19.8108	18.2768	23.0224	PTPRF	1	43525187	43623666	+	10712	protein_coding	protein tyrosine phosphatase, receptor type F [Source:HGNC Symbol;Acc:HGNC:9670]	-
ENSG00000166888	31.8486	21.3701	41.2983	20.1611	20.8354	STAT6	12	57095408	57132139	-	7298	protein_coding	signal transducer and activator of transcription 6 [Source:HGNC Symbol;Acc:HGNC:11368]	STAT
ENSG00000131876	6.22256	11.0789	6.70677	14.2585	10.5053	SNRPA1	15	101281510	101295282	-	3669	protein_coding	small nuclear ribonucleoprotein polypeptide A' [Source:HGNC Symbol;Acc:HGNC:11152]	-
ENSG00000154760	0.0394768	0.425569	0.0432371	0.324277	0.36361	SLFN13	17	35435096	35448837	-	9329	protein_coding	schlafen family member 13 [Source:HGNC Symbol;Acc:HGNC:26481]	-
ENSG00000196526	11.2901	17.4874	13.3875	15.5725	19.1235	AFAP1	4	7758714	7939926	-	10036	protein_coding	actin filament associated protein 1 [Source:HGNC Symbol;Acc:HGNC:24017]	-
ENSG00000070961	25.3055	15.783	21.3113	14.8389	17.8909	ATP2B1	12	89588049	89709300	-	9493	protein_coding	ATPase plasma membrane Ca2+ transporting 1 [Source:HGNC Symbol;Acc:HGNC:814]	-
ENSG00000164163	14.0008	21.2824	7.68555	18.9348	21.909	ABCE1	4	145097932	145129179	+	6265	protein_coding	ATP binding cassette subfamily E member 1 [Source:HGNC Symbol;Acc:HGNC:69]	-
ENSG00000145220	3.80444	8.52437	1.96471	8.55708	7.04269	LYAR	4	4267701	4290169	-	2319	protein_coding	Ly1 antibody reactive [Source:HGNC Symbol;Acc:HGNC:26021]	-
ENSG00000119899	33.5279	22.1408	25.569	20.1327	23.2721	SLC17A5	6	73593379	73654155	-	3604	protein_coding	solute carrier family 17 member 5 [Source:HGNC Symbol;Acc:HGNC:10933]	-
ENSG00000166920	3.34294	0.419766	6.89496	0.739932	0.880956	C15orf48	15	45430529	45448761	+	1405	protein_coding	chromosome 15 open reading frame 48 [Source:HGNC Symbol;Acc:HGNC:29898]	-
ENSG00000138078	11.9888	7.29305	8.75053	6.94136	8.16874	PREPL	2	44316281	44361862	-	8153	protein_coding	prolyl endopeptidase like [Source:HGNC Symbol;Acc:HGNC:30228]	-
ENSG00000112941	4.68763	7.74153	4.81022	6.76249	7.77766	TENT4A	5	6713007	6757048	+	6785	protein_coding	terminal nucleotidyltransferase 4A [Source:HGNC Symbol;Acc:HGNC:16705]	-
ENSG00000072042	21.5819	14.3693	14.1824	13.1856	16.458	RDH11	14	67676801	67695814	-	5518	protein_coding	retinol dehydrogenase 11 [Source:HGNC Symbol;Acc:HGNC:17964]	-
ENSG00000168061	12.6657	22.4277	12.2227	27.5525	19.9994	SAC3D1	11	65040901	65044828	+	1772	protein_coding	SAC3 domain containing 1 [Source:HGNC Symbol;Acc:HGNC:30179]	-
ENSG00000149809	7.47681	3.20704	4.64313	1.77679	2.75844	TM7SF2	11	65111845	65116384	+	3408	protein_coding	transmembrane 7 superfamily member 2 [Source:HGNC Symbol;Acc:HGNC:11863]	-
ENSG00000078018	0.575093	0.126246	0.438576	0.245007	0.221478	MAP2	2	209424058	209734118	+	11559	protein_coding	microtubule associated protein 2 [Source:HGNC Symbol;Acc:HGNC:6839]	-
ENSG00000163870	16.4264	10.3755	17.7554	12.2567	9.56606	TPRA1	3	127571266	127598267	-	5622	protein_coding	transmembrane protein adipocyte associated 1 [Source:HGNC Symbol;Acc:HGNC:30413]	-
ENSG00000241749	0.759421	3.33209	1.09019	4.11273	4.3115	RPSAP52	12	65758020	65826997	-	2035	transcribed_processed_pseudogene	ribosomal protein SA pseudogene 52 [Source:HGNC Symbol;Acc:HGNC:35752]	-
ENSG00000163220	10.4258	0	18.8448	0	0	S100A9	1	153357854	153361027	+	577	protein_coding	S100 calcium binding protein A9 [Source:HGNC Symbol;Acc:HGNC:10499]	-
ENSG00000253537	5.30749	2.47818	5.46927	2.11918	3.01622	PCDHGA7	5	141382739	141512979	+	5443	protein_coding	protocadherin gamma subfamily A, 7 [Source:HGNC Symbol;Acc:HGNC:8705]	-
ENSG00000274180	4.83702	2.23773	5.51154	1.95471	1.93119	NATD1	17	21238870	21253410	-	4931	protein_coding	N-acetyltransferase domain containing 1 [Source:HGNC Symbol;Acc:HGNC:30770]	-
ENSG00000168994	12.9593	22.6392	10.2781	25.6044	25.5605	PXDC1	6	3722614	3752026	-	2474	protein_coding	PX domain containing 1 [Source:HGNC Symbol;Acc:HGNC:21361]	-
ENSG00000005486	40.1548	24.6718	41.218	29.6455	24.6962	RHBDD2	7	75842602	75888926	+	2441	protein_coding	rhomboid domain containing 2 [Source:HGNC Symbol;Acc:HGNC:23082]	-
ENSG00000132879	10.0343	5.21063	12.7782	7.33562	4.98449	FBXO44	1	11654375	11663327	+	3527	protein_coding	F-box protein 44 [Source:HGNC Symbol;Acc:HGNC:24847]	-
ENSG00000139496	3.80771	5.997	3.39836	5.26526	6.74779	NUP58	13	25301524	25349800	+	10422	protein_coding	nucleoporin 58 [Source:HGNC Symbol;Acc:HGNC:20261]	-
ENSG00000187955	1.10463	0.267197	1.21447	0.318801	0.338469	COL14A1	8	120059780	120372036	+	8647	protein_coding	collagen type XIV alpha 1 chain [Source:HGNC Symbol;Acc:HGNC:2191]	-
ENSG00000149418	1.3882	0	1.59342	0	0.0142301	ST14	11	130159562	130210376	+	4350	protein_coding	suppression of tumorigenicity 14 [Source:HGNC Symbol;Acc:HGNC:11344]	-
ENSG00000124171	0.831657	0.0520711	1.38786	0.0325508	0.0419861	PARD6B	20	50731544	50756795	+	4726	protein_coding	par-6 family cell polarity regulator beta [Source:HGNC Symbol;Acc:HGNC:16245]	-
ENSG00000169756	13.4433	19.2907	15.6733	19.5258	23.7345	LIMS1	2	108534355	108687246	+	7771	protein_coding	LIM zinc finger domain containing 1 [Source:HGNC Symbol;Acc:HGNC:6616]	-
ENSG00000007866	17.8781	29.2721	20.1468	25.5382	27.7118	TEAD3	6	35473597	35497076	-	3046	protein_coding	TEA domain transcription factor 3 [Source:HGNC Symbol;Acc:HGNC:11716]	TEA
ENSG00000128708	6.89284	11.1515	5.96708	11.8388	10.2655	HAT1	2	171922448	171983682	+	6790	protein_coding	histone acetyltransferase 1 [Source:HGNC Symbol;Acc:HGNC:4821]	-
ENSG00000104765	41.7818	26.1263	86.4798	34.0167	29.287	BNIP3L	8	26382898	26505636	+	4307	protein_coding	BCL2 interacting protein 3 like [Source:HGNC Symbol;Acc:HGNC:1085]	-
ENSG00000100596	7.54906	11.644	9.00288	10.4857	11.465	SPTLC2	14	77505997	77616773	-	9143	protein_coding	serine palmitoyltransferase long chain base subunit 2 [Source:HGNC Symbol;Acc:HGNC:11278]	-
ENSG00000096433	12.4488	19.9095	15.5352	11.8629	19.9837	ITPR3	6	33620365	33696574	+	9870	protein_coding	inositol 1,4,5-trisphosphate receptor type 3 [Source:HGNC Symbol;Acc:HGNC:6182]	-
ENSG00000128050	14.0697	20.3684	16.2347	18.12	20.1624	PAICS	4	56435741	56464579	+	7517	protein_coding	phosphoribosylaminoimidazole carboxylase and phosphoribosylaminoimidazolesuccinocarboxamide synthase [Source:HGNC Symbol;Acc:HGNC:8587]	-
ENSG00000184371	25.7906	17.0217	18.8909	18.0515	18.6677	CSF1	1	109910242	109930992	+	5418	protein_coding	colony stimulating factor 1 [Source:HGNC Symbol;Acc:HGNC:2432]	-
ENSG00000218739	12.2601	7.34642	10.2981	8.93526	8.45428	CEBPZOS	2	37196488	37216193	+	4698	protein_coding	CEBPZ opposite strand [Source:HGNC Symbol;Acc:HGNC:49288]	-
ENSG00000019549	48.851	31.6204	54.2682	37.2031	36.4263	SNAI2	8	48917604	48921740	-	3392	protein_coding	snail family transcriptional repressor 2 [Source:HGNC Symbol;Acc:HGNC:11094]	zf-C2H2
ENSG00000198853	15.9942	24.3993	16.1206	23.4642	25.3394	RUSC2	9	35490127	35561898	+	5682	protein_coding	RUN and SH3 domain containing 2 [Source:HGNC Symbol;Acc:HGNC:23625]	-
ENSG00000167657	34.623	55.7636	39.9353	81.9347	55.404	DAPK3	19	3958453	3971123	-	3549	protein_coding	death associated protein kinase 3 [Source:HGNC Symbol;Acc:HGNC:2676]	-
ENSG00000132530	2.4217	0.965205	2.55308	0.871445	1.04037	XAF1	17	6755447	6775647	+	6615	protein_coding	XIAP associated factor 1 [Source:HGNC Symbol;Acc:HGNC:30932]	-
ENSG00000080824	274.991	191.986	153.138	191.88	191.389	HSP90AA1	14	102080738	102139699	-	5248	protein_coding	heat shock protein 90 alpha family class A member 1 [Source:HGNC Symbol;Acc:HGNC:5253]	-
ENSG00000126216	2.71944	4.88407	2.44172	3.98379	4.83152	TUBGCP3	13	112485005	112588205	-	7254	protein_coding	tubulin gamma complex associated protein 3 [Source:HGNC Symbol;Acc:HGNC:18598]	-
ENSG00000123975	25.1943	51.1903	21.6708	43.393	43.8247	CKS2	9	89311198	89316703	+	613	protein_coding	CDC28 protein kinase regulatory subunit 2 [Source:HGNC Symbol;Acc:HGNC:2000]	-
ENSG00000136738	11.3607	18.3115	10.1759	13.1211	16.1554	STAM	10	17644125	17715914	+	3246	protein_coding	signal transducing adaptor molecule [Source:HGNC Symbol;Acc:HGNC:11357]	-
ENSG00000137776	4.43814	7.30123	4.32787	7.26484	7.69518	SLTM	15	58879045	58933653	-	8157	protein_coding	SAFB like transcription modulator [Source:HGNC Symbol;Acc:HGNC:20709]	-
ENSG00000137207	62.809	42.968	66.2301	45.6312	43.915	YIPF3	6	43511827	43516990	-	3053	protein_coding	Yip1 domain family member 3 [Source:HGNC Symbol;Acc:HGNC:21023]	-
ENSG00000106554	9.32701	15.1463	7.45819	13.6982	12.3724	CHCHD3	7	132784868	133082088	-	3428	protein_coding	coiled-coil-helix-coiled-coil-helix domain containing 3 [Source:HGNC Symbol;Acc:HGNC:21906]	-
ENSG00000168874	18.488	11.6701	28.1552	15.7967	12.587	ATOH8	2	85751344	85788066	+	6076	protein_coding	atonal bHLH transcription factor 8 [Source:HGNC Symbol;Acc:HGNC:24126]	bHLH
ENSG00000159388	12.1449	6.33711	18.7368	4.79189	4.64201	BTG2	1	203305491	203309602	+	2757	protein_coding	BTG anti-proliferation factor 2 [Source:HGNC Symbol;Acc:HGNC:1131]	-
ENSG00000061656	3.88703	1.02517	11.5597	3.27018	1.48941	SPAG4	20	35615892	35621049	+	2240	protein_coding	sperm associated antigen 4 [Source:HGNC Symbol;Acc:HGNC:11214]	-
ENSG00000197496	18.029	11.5743	17.4899	9.78798	13.9803	SLC2A10	20	46709487	46736347	+	5000	protein_coding	solute carrier family 2 member 10 [Source:HGNC Symbol;Acc:HGNC:13444]	-
ENSG00000114023	10.0536	4.80978	27.6195	8.81298	4.55562	FAM162A	3	122384176	122412334	+	3793	protein_coding	family with sequence similarity 162 member A [Source:HGNC Symbol;Acc:HGNC:17865]	-
ENSG00000171444	3.2363	1.50287	3.51558	1.4526	1.75137	MCC	5	113022099	113488830	-	10746	protein_coding	MCC, WNT signaling pathway regulator [Source:HGNC Symbol;Acc:HGNC:6935]	-
ENSG00000157020	22.4401	33.6319	22.7512	37.2656	29.7267	SEC13	3	10293131	10321178	-	5446	protein_coding	SEC13 homolog, nuclear pore and COPII coat complex component [Source:HGNC Symbol;Acc:HGNC:10697]	-
ENSG00000198625	1.04475	2.09775	1.48384	1.97171	1.8462	MDM4	1	204516379	204558120	+	11008	protein_coding	MDM4, p53 regulator [Source:HGNC Symbol;Acc:HGNC:6974]	-
ENSG00000234537	3.07781	0.578086	6.00112	1.51306	0.795136	AL354751.1	9	92132398	92138629	+	1863	unprocessed_pseudogene	protein tyrosine phosphatase pseudogene [Source:NCBI gene;Acc:100128076]	-
ENSG00000183723	5.5826	3.16707	4.2487	2.62263	3.74426	CMTM4	16	66614750	66696707	-	8117	protein_coding	CKLF like MARVEL transmembrane domain containing 4 [Source:HGNC Symbol;Acc:HGNC:19175]	-
ENSG00000153993	0.20288	0.85871	0.220902	0.579851	0.844287	SEMA3D	7	84995553	85186855	-	8062	protein_coding	semaphorin 3D [Source:HGNC Symbol;Acc:HGNC:10726]	-
ENSG00000185504	9.6825	14.9808	8.37284	16.1298	15.0993	FAAP100	17	81539885	81553961	-	5354	protein_coding	FA core complex associated protein 100 [Source:HGNC Symbol;Acc:HGNC:26171]	-
ENSG00000062038	0.603425	0.0269139	0.859939	0.00704364	0.0069157	CDH3	16	68636189	68722616	+	6236	protein_coding	cadherin 3 [Source:HGNC Symbol;Acc:HGNC:1762]	-
ENSG00000105357	0.538863	0	0.62872	0.00200149	0	MYH14	19	50188186	50310544	+	10392	protein_coding	myosin heavy chain 14 [Source:HGNC Symbol;Acc:HGNC:23212]	-
ENSG00000105971	14.6712	22.0593	13.6134	27.8379	23.2706	CAV2	7	116287380	116508541	+	6926	protein_coding	caveolin 2 [Source:HGNC Symbol;Acc:HGNC:1528]	-
ENSG00000189308	2.13284	4.02756	2.41207	2.76948	3.7737	LIN54	4	82909973	83012926	-	6768	protein_coding	lin-54 DREAM MuvB core complex component [Source:HGNC Symbol;Acc:HGNC:25397]	-
ENSG00000099812	1.41147	0.0355061	1.03562	0.0454092	0.0271202	MISP	19	751126	764318	+	2966	protein_coding	mitotic spindle positioning [Source:HGNC Symbol;Acc:HGNC:27000]	-
ENSG00000135596	16.2368	22.8533	23.7954	24.4565	22.3259	MICAL1	6	109444062	109465968	-	7056	protein_coding	microtubule associated monooxygenase, calponin and LIM domain containing 1 [Source:HGNC Symbol;Acc:HGNC:20619]	-
ENSG00000133302	0.67158	1.75227	0.436682	1.46464	1.7173	SLF1	5	94618347	94739436	+	7185	protein_coding	SMC5-SMC6 complex localization factor 1 [Source:HGNC Symbol;Acc:HGNC:25408]	-
ENSG00000172403	0.283336	0.839838	0.320616	1.38599	1.423	SYNPO2	4	118850688	119061247	+	14034	protein_coding	synaptopodin 2 [Source:HGNC Symbol;Acc:HGNC:17732]	-
ENSG00000125945	7.05344	3.74223	10.6421	3.5921	3.54214	ZNF436	1	23359448	23369442	-	4392	protein_coding	zinc finger protein 436 [Source:HGNC Symbol;Acc:HGNC:20814]	zf-C2H2
ENSG00000119977	32.554	20.1855	28.8578	18.0235	20.708	TCTN3	10	95663396	95694143	-	3223	protein_coding	tectonic family member 3 [Source:HGNC Symbol;Acc:HGNC:24519]	-
ENSG00000204634	2.37662	0.917983	5.08945	0.726213	0.871527	TBC1D8	2	101007617	101252866	-	6030	protein_coding	TBC1 domain family member 8 [Source:HGNC Symbol;Acc:HGNC:17791]	-
ENSG00000139687	7.9261	12.9934	6.75228	9.83424	13.6762	RB1	13	48303726	48599436	+	6452	protein_coding	RB transcriptional corepressor 1 [Source:HGNC Symbol;Acc:HGNC:9884]	-
ENSG00000163462	1.75049	4.07775	4.63635	2.92458	3.37298	TRIM46	1	155173787	155184971	+	4533	protein_coding	tripartite motif containing 46 [Source:HGNC Symbol;Acc:HGNC:19019]	-
ENSG00000271383	0.731551	1.39616	0.873664	1.42356	1.30258	NBPF19	1	149390623	149556361	+	18785	protein_coding	NBPF member 19 [Source:HGNC Symbol;Acc:HGNC:31999]	-
ENSG00000176720	17.1379	27.4102	24.6333	30.3551	27.4823	BOK	2	241551424	241574138	+	2711	protein_coding	BOK, BCL2 family apoptosis regulator [Source:HGNC Symbol;Acc:HGNC:1087]	-
ENSG00000099917	12.5975	18.12	14.5041	18.798	17.1901	MED15	22	20495913	20587632	+	10374	protein_coding	mediator complex subunit 15 [Source:HGNC Symbol;Acc:HGNC:14248]	-
ENSG00000023445	0.593446	0.0665321	0.733035	0.0824188	0.0853736	BIRC3	11	102317450	102339403	+	7518	protein_coding	baculoviral IAP repeat containing 3 [Source:HGNC Symbol;Acc:HGNC:591]	-
ENSG00000164941	5.93004	3.4668	3.7645	3.32251	3.83458	INTS8	8	94813311	94881746	+	7866	protein_coding	integrator complex subunit 8 [Source:HGNC Symbol;Acc:HGNC:26048]	-
ENSG00000124875	2.66222	0.433524	5.67314	1.08974	0.71447	CXCL6	4	73836497	73849064	+	2183	protein_coding	C-X-C motif chemokine ligand 6 [Source:HGNC Symbol;Acc:HGNC:10643]	-
ENSG00000179967	16.474	39.4898	20.3742	48.0277	32.3639	PPP1R14BP3	4	139114930	139115374	-	445	processed_pseudogene	protein phosphatase 1 regulatory inhibitor subunit 14B pseudogene 3 [Source:HGNC Symbol;Acc:HGNC:16330]	-
ENSG00000170909	2.74731	0.52612	4.15955	0.824843	0.784191	OSCAR	19	54094668	54102692	-	2084	protein_coding	osteoclast associated, immunoglobulin-like receptor [Source:HGNC Symbol;Acc:HGNC:29960]	-
ENSG00000123091	63.7184	43.1363	56.3792	46.3241	47.9234	RNF11	1	51236271	51273455	+	3122	protein_coding	ring finger protein 11 [Source:HGNC Symbol;Acc:HGNC:10056]	-
ENSG00000060656	9.48775	5.63446	16.6191	6.59693	6.5772	PTPRU	1	29236516	29326813	+	6682	protein_coding	protein tyrosine phosphatase, receptor type U [Source:HGNC Symbol;Acc:HGNC:9683]	-
ENSG00000232931	0.821715	3.20063	1.09099	2.95309	2.67366	LINC00342	2	95807118	95816215	-	2618	lincRNA	long intergenic non-protein coding RNA 342 [Source:HGNC Symbol;Acc:HGNC:42470]	-
ENSG00000007944	5.77996	2.26434	7.59295	2.16138	1.83322	MYLIP	6	16129125	16148248	+	3033	protein_coding	myosin regulatory light chain interacting protein [Source:HGNC Symbol;Acc:HGNC:21155]	-
ENSG00000175224	16.0074	10.6732	16.7443	11.5809	11.0951	ATG13	11	46617527	46674818	+	7001	protein_coding	autophagy related 13 [Source:HGNC Symbol;Acc:HGNC:29091]	-
ENSG00000102409	18.7617	9.44047	24.8799	12.1747	12.2326	BEX4	X	103215092	103217246	+	1328	protein_coding	brain expressed X-linked 4 [Source:HGNC Symbol;Acc:HGNC:25475]	-
ENSG00000088367	11.3705	7.44284	11.6365	7.0093	8.08997	EPB41L1	20	36091504	36232799	+	9674	protein_coding	erythrocyte membrane protein band 4.1 like 1 [Source:HGNC Symbol;Acc:HGNC:3378]	-
ENSG00000196639	1.40574	3.17884	2.49648	2.39347	3.03381	HRH1	3	11137093	11263557	+	5546	protein_coding	histamine receptor H1 [Source:HGNC Symbol;Acc:HGNC:5182]	-
ENSG00000141569	4.78716	8.55551	5.18744	7.77291	7.83633	TRIM65	17	75880335	75897003	-	3955	protein_coding	tripartite motif containing 65 [Source:HGNC Symbol;Acc:HGNC:27316]	-
ENSG00000166135	8.87372	5.81131	8.09285	5.7357	5.91739	HIF1AN	10	100529072	100559998	+	13950	protein_coding	hypoxia inducible factor 1 subunit alpha inhibitor [Source:HGNC Symbol;Acc:HGNC:17113]	-
ENSG00000145725	2.7359	4.52744	2.42318	4.06074	4.71555	PPIP5K2	5	103120149	103212799	+	17270	protein_coding	diphosphoinositol pentakisphosphate kinase 2 [Source:HGNC Symbol;Acc:HGNC:29035]	-
ENSG00000184254	0.747307	0.0937357	1.22416	0.142814	0.0698614	ALDH1A3	15	100877714	100916626	+	5772	protein_coding	aldehyde dehydrogenase 1 family member A3 [Source:HGNC Symbol;Acc:HGNC:409]	-
ENSG00000068438	10.8756	18.0151	11.538	20.483	18.2977	FTSJ1	X	48476021	48486364	+	2872	protein_coding	FtsJ RNA methyltransferase homolog 1 [Source:HGNC Symbol;Acc:HGNC:13254]	-
ENSG00000226380	0.0554602	0.538275	0.0697626	0.422653	0.338164	LINC-PINT	7	130876809	130913310	-	6619	lincRNA	long intergenic non-protein coding RNA, p53 induced transcript [Source:NCBI gene;Acc:378805]	-
ENSG00000088298	28.2789	16.3558	29.0492	17.3644	17.9191	EDEM2	20	35115357	35147364	-	1919	protein_coding	ER degradation enhancing alpha-mannosidase like protein 2 [Source:HGNC Symbol;Acc:HGNC:15877]	-
ENSG00000078053	1.2922	2.95119	1.81587	2.66659	2.72112	AMPH	7	38383704	38631567	-	5636	protein_coding	amphiphysin [Source:HGNC Symbol;Acc:HGNC:471]	-
ENSG00000182010	0.106168	0.598984	0.101966	0.480732	0.619433	RTKN2	10	62183035	62268707	-	9548	protein_coding	rhotekin 2 [Source:HGNC Symbol;Acc:HGNC:19364]	-
ENSG00000133106	0.828462	0.07201	0.812233	0.123451	0.0778094	EPSTI1	13	42886388	42992271	-	4924	protein_coding	epithelial stromal interaction 1 [Source:HGNC Symbol;Acc:HGNC:16465]	-
ENSG00000175155	2.13566	0.924352	2.70639	0.962983	1.03117	YPEL2	17	59331689	59401729	+	8667	protein_coding	yippee like 2 [Source:HGNC Symbol;Acc:HGNC:18326]	-
ENSG00000170113	3.78315	6.10326	2.83805	5.76329	6.30535	NIPA1	15	22773063	22829791	+	8700	protein_coding	NIPA magnesium transporter 1 [Source:HGNC Symbol;Acc:HGNC:17043]	-
ENSG00000196542	1.42112	0	3.33896	0	0	SPTSSB	3	161344792	161372880	-	3745	protein_coding	serine palmitoyltransferase small subunit B [Source:HGNC Symbol;Acc:HGNC:24045]	-
ENSG00000166473	0.220051	0.0223357	0.274792	0.0359507	0.0364127	PKD1L2	16	81100875	81220370	-	18637	polymorphic_pseudogene	polycystin 1 like 2 (gene/pseudogene) [Source:HGNC Symbol;Acc:HGNC:21715]	-
ENSG00000107201	7.81746	4.21974	5.96815	3.32748	3.88513	DDX58	9	32455705	32526324	-	4353	protein_coding	DExD/H-box helicase 58 [Source:HGNC Symbol;Acc:HGNC:19102]	-
ENSG00000230487	2.21019	0.863114	2.20814	1.07864	1.00031	PSMG3-AS1	7	1570073	1589626	+	6355	lincRNA	PSMG3 antisense RNA 1 (head to head) [Source:HGNC Symbol;Acc:HGNC:22230]	-
ENSG00000102317	27.999	39.9915	29.9117	51.4008	39.4015	RBM3	X	48574449	48579066	+	3731	protein_coding	RNA binding motif protein 3 [Source:HGNC Symbol;Acc:HGNC:9900]	-
ENSG00000151718	6.27311	9.57417	5.16851	9.61018	12.3515	WWC2	4	183099293	183320777	+	9966	protein_coding	WW and C2 domain containing 2 [Source:HGNC Symbol;Acc:HGNC:24148]	-
ENSG00000185022	4.06853	7.40193	8.07127	6.62723	6.90596	MAFF	22	38200767	38216511	+	5615	protein_coding	MAF bZIP transcription factor F [Source:HGNC Symbol;Acc:HGNC:6780]	TF_bZIP
ENSG00000115266	1.25081	0.488447	0.936123	0.509812	0.605551	APC2	19	1446302	1473244	+	12610	protein_coding	APC2, WNT signaling pathway regulator [Source:HGNC Symbol;Acc:HGNC:24036]	-
ENSG00000117592	110.407	164.534	149.396	197.07	163.368	PRDX6	1	173477266	173488807	+	2367	protein_coding	peroxiredoxin 6 [Source:HGNC Symbol;Acc:HGNC:16753]	-
ENSG00000169554	2.96016	1.89049	3.37432	1.6092	1.96612	ZEB2	2	144364364	144524583	-	25058	protein_coding	zinc finger E-box binding homeobox 2 [Source:HGNC Symbol;Acc:HGNC:14881]	zf-C2H2
ENSG00000108370	1.04844	0.244523	2.5253	0.749201	0.490063	RGS9	17	65100812	65227703	+	6990	protein_coding	regulator of G protein signaling 9 [Source:HGNC Symbol;Acc:HGNC:10004]	-
ENSG00000126777	16.8262	11.1502	13.6646	10.6903	12.3138	KTN1	14	55559072	55701526	+	17575	protein_coding	kinectin 1 [Source:HGNC Symbol;Acc:HGNC:6467]	-
ENSG00000176907	6.49828	2.22331	13.8843	6.47459	3.53143	TCIM	8	40153455	40155308	+	1854	protein_coding	transcriptional and immune response regulator [Source:HGNC Symbol;Acc:HGNC:1357]	-
ENSG00000001036	57.2974	38.6931	56.5053	38.7126	37.4013	FUCA2	6	143494811	143511690	-	2793	protein_coding	alpha-L-fucosidase 2 [Source:HGNC Symbol;Acc:HGNC:4008]	-
ENSG00000167700	28.2819	14.7882	28.2221	23.1168	16.8613	MFSD3	8	144509074	144511213	+	1823	protein_coding	major facilitator superfamily domain containing 3 [Source:HGNC Symbol;Acc:HGNC:25157]	-
ENSG00000241553	18.5324	29.9608	19.3697	43.1547	25.6141	ARPC4	3	9792495	9807726	+	3608	protein_coding	actin related protein 2/3 complex subunit 4 [Source:HGNC Symbol;Acc:HGNC:707]	-
ENSG00000099998	0.0962566	0.671383	0.214376	1.29961	0.77012	GGT5	22	24219654	24245142	-	6054	protein_coding	gamma-glutamyltransferase 5 [Source:HGNC Symbol;Acc:HGNC:4260]	-
ENSG00000145284	7.58818	4.15904	6.82628	3.79462	4.22974	SCD5	4	82629539	82798857	-	4292	protein_coding	stearoyl-CoA desaturase 5 [Source:HGNC Symbol;Acc:HGNC:21088]	-
ENSG00000177707	12.4823	18.0383	10.2011	19.5955	21.0779	NECTIN3	3	111070071	111275563	+	6184	protein_coding	nectin cell adhesion molecule 3 [Source:HGNC Symbol;Acc:HGNC:17664]	-
ENSG00000259498	0.0745672	0.999893	0.300689	1.21092	0.998821	TPM1-AS	15	63046034	63049387	-	3354	antisense	TPM1 antisense RNA [Source:HGNC Symbol;Acc:HGNC:53635]	-
ENSG00000167173	8.5541	5.09995	7.76274	5.03406	5.81387	C15orf39	15	75195643	75212169	+	5812	protein_coding	chromosome 15 open reading frame 39 [Source:HGNC Symbol;Acc:HGNC:24497]	-
ENSG00000125835	60.4204	100.161	55.4508	147.034	86.672	SNRPB	20	2461634	2470853	-	1278	protein_coding	small nuclear ribonucleoprotein polypeptides B and B1 [Source:HGNC Symbol;Acc:HGNC:11153]	-
ENSG00000088387	1.25554	2.32407	0.988693	1.63842	2.14116	DOCK9	13	98793429	99086625	-	14816	protein_coding	dedicator of cytokinesis 9 [Source:HGNC Symbol;Acc:HGNC:14132]	-
ENSG00000144824	2.8201	4.4085	2.99621	4.89152	4.8315	PHLDB2	3	111732497	111976517	+	12309	protein_coding	pleckstrin homology like domain family B member 2 [Source:HGNC Symbol;Acc:HGNC:29573]	-
ENSG00000198663	30.0666	20.307	29.5408	21.6617	22.3535	C6orf89	6	36871870	36928964	+	7340	protein_coding	chromosome 6 open reading frame 89 [Source:HGNC Symbol;Acc:HGNC:21114]	-
ENSG00000146410	0.374427	1.9871	0.419137	1.55156	1.75224	MTFR2	6	136231024	136250335	-	2450	protein_coding	mitochondrial fission regulator 2 [Source:HGNC Symbol;Acc:HGNC:21115]	-
ENSG00000139531	6.06164	3.26952	4.55782	3.95933	3.22555	SUOX	12	55997180	56006641	+	5008	protein_coding	sulfite oxidase [Source:HGNC Symbol;Acc:HGNC:11460]	-
ENSG00000168890	10.8101	6.04452	6.62958	5.64046	5.99567	TMEM150A	2	85598548	85603196	-	3094	protein_coding	transmembrane protein 150A [Source:HGNC Symbol;Acc:HGNC:24677]	-
ENSG00000124831	6.14871	9.10199	5.54678	8.57682	9.48527	LRRFIP1	2	237627576	237813682	+	11901	protein_coding	LRR binding FLII interacting protein 1 [Source:HGNC Symbol;Acc:HGNC:6702]	-
ENSG00000020129	19.577	12.9339	15.4258	10.772	13.8008	NCDN	1	35557473	35567274	+	4917	protein_coding	neurochondrin [Source:HGNC Symbol;Acc:HGNC:17597]	-
ENSG00000107789	24.6619	15.6108	15.1844	15.2761	17.8346	MINPP1	10	87504875	87553460	+	3016	protein_coding	multiple inositol-polyphosphate phosphatase 1 [Source:HGNC Symbol;Acc:HGNC:7102]	-
ENSG00000158402	0.349094	1.71583	0.389401	1.25755	1.67898	CDC25C	5	138285265	138338355	-	3338	protein_coding	cell division cycle 25C [Source:HGNC Symbol;Acc:HGNC:1727]	-
ENSG00000124207	28.217	40.978	21.5949	32.6243	42.1969	CSE1L	20	49046246	49096960	+	3800	protein_coding	chromosome segregation 1 like [Source:HGNC Symbol;Acc:HGNC:2431]	-
ENSG00000075826	2.21996	0.979306	2.93158	0.926089	0.885523	SEC31B	10	100486642	100519864	-	7938	protein_coding	SEC31 homolog B, COPII coat complex component [Source:HGNC Symbol;Acc:HGNC:23197]	-
ENSG00000069399	8.77667	4.41959	12.0618	5.70171	4.24203	BCL3	19	44747705	44760044	+	3242	protein_coding	B cell CLL/lymphoma 3 [Source:HGNC Symbol;Acc:HGNC:998]	-
ENSG00000165861	14.5741	9.32822	18.2171	8.42316	8.82247	ZFYVE1	14	72969451	73027212	-	5306	protein_coding	zinc finger FYVE-type containing 1 [Source:HGNC Symbol;Acc:HGNC:13180]	-
ENSG00000118058	1.20312	2.1228	1.82304	1.50764	1.78785	KMT2A	11	118436464	118526832	+	31305	protein_coding	lysine methyltransferase 2A [Source:HGNC Symbol;Acc:HGNC:7132]	-
ENSG00000164220	21.5426	13.794	21.3136	13.8851	16.0139	F2RL2	5	76615482	76623434	-	3429	protein_coding	coagulation factor II thrombin receptor like 2 [Source:HGNC Symbol;Acc:HGNC:3539]	-
ENSG00000112343	3.24786	1.74793	3.16701	2.0419	2.00679	TRIM38	6	25962802	25991226	+	9413	protein_coding	tripartite motif containing 38 [Source:HGNC Symbol;Acc:HGNC:10059]	-
ENSG00000132510	8.7152	5.3507	13.8631	4.99434	5.31959	KDM6B	17	7839904	7854796	+	7258	protein_coding	lysine demethylase 6B [Source:HGNC Symbol;Acc:HGNC:29012]	-
ENSG00000198873	2.4744	4.68799	2.27324	4.32838	4.3184	GRK5	10	119207589	119459742	+	7000	protein_coding	G protein-coupled receptor kinase 5 [Source:HGNC Symbol;Acc:HGNC:4544]	-
ENSG00000196843	2.41782	5.6609	3.71484	5.31395	4.72543	ARID5A	2	96536743	96552638	+	3565	protein_coding	AT-rich interaction domain 5A [Source:HGNC Symbol;Acc:HGNC:17361]	ARID
ENSG00000106105	36.5899	51.1218	34.6672	48.2336	56.086	GARS	7	30594681	30634033	+	4152	protein_coding	glycyl-tRNA synthetase [Source:HGNC Symbol;Acc:HGNC:4162]	-
ENSG00000179163	12.6906	6.48299	12.0448	7.76339	6.57242	FUCA1	1	23845077	23868294	-	2047	protein_coding	alpha-L-fucosidase 1 [Source:HGNC Symbol;Acc:HGNC:4006]	-
ENSG00000030419	0.176535	0.68108	0.40085	0.525103	0.676428	IKZF2	2	212999691	213152427	-	12240	protein_coding	IKAROS family zinc finger 2 [Source:HGNC Symbol;Acc:HGNC:13177]	zf-C2H2
ENSG00000180611	1.88722	4.51717	2.91786	5.33153	5.05473	MB21D2	3	192796815	192918161	-	3368	protein_coding	Mab-21 domain containing 2 [Source:HGNC Symbol;Acc:HGNC:30438]	-
ENSG00000169604	82.4302	58.7939	96.6341	60.5962	66.0715	ANTXR1	2	69013178	69249327	+	8185	protein_coding	ANTXR cell adhesion molecule 1 [Source:HGNC Symbol;Acc:HGNC:21014]	-
ENSG00000136710	10.3995	5.92014	10.1007	7.70499	6.29186	CCDC115	2	130338241	130342349	-	3782	protein_coding	coiled-coil domain containing 115 [Source:HGNC Symbol;Acc:HGNC:28178]	-
ENSG00000058804	4.7218	8.03549	3.77064	6.52565	8.01327	NDC1	1	53765460	53838860	-	5135	protein_coding	NDC1 transmembrane nucleoporin [Source:HGNC Symbol;Acc:HGNC:25525]	-
ENSG00000260910	1.02417	3.64918	0.713459	2.90177	4.07698	LINC00565	13	113926514	113928844	-	2331	lincRNA	long intergenic non-protein coding RNA 565 [Source:HGNC Symbol;Acc:HGNC:43709]	-
ENSG00000185305	4.93015	2.15172	4.63561	2.22321	2.29055	ARL15	5	53883945	54310582	-	3797	protein_coding	ADP ribosylation factor like GTPase 15 [Source:HGNC Symbol;Acc:HGNC:25945]	-
ENSG00000210196	383.577	180.754	368.465	207.027	138.845	MT-TP	MT	15956	16023	-	68	Mt_tRNA	mitochondrially encoded tRNA proline [Source:HGNC Symbol;Acc:HGNC:7494]	-
ENSG00000131981	144.493	89.4602	232.101	92.9054	79.6396	LGALS3	14	55124110	55145413	+	2397	protein_coding	galectin 3 [Source:HGNC Symbol;Acc:HGNC:6563]	-
ENSG00000268858	0.762429	2.56919	1.51369	1.76327	1.82145	AL118506.1	20	63861212	63864293	-	3082	antisense	novel transcript, antisense to ABHD16B	-
ENSG00000074800	177.432	260.468	253.209	277.025	249.531	ENO1	1	8861000	8879250	-	5276	protein_coding	enolase 1 [Source:HGNC Symbol;Acc:HGNC:3350]	-
ENSG00000134046	8.08936	12.264	8.16471	13.0265	12.0337	MBD2	18	54151601	54224788	-	5810	protein_coding	methyl-CpG binding domain protein 2 [Source:HGNC Symbol;Acc:HGNC:6917]	MBD
ENSG00000100241	37.5466	26.123	30.6686	25.8181	28.3896	SBF1	22	50445000	50475024	-	9441	protein_coding	SET binding factor 1 [Source:HGNC Symbol;Acc:HGNC:10542]	-
ENSG00000115687	0.625725	1.54405	1.18848	0.939537	1.33736	PASK	2	241106099	241150264	-	10686	protein_coding	PAS domain containing serine/threonine kinase [Source:HGNC Symbol;Acc:HGNC:17270]	-
ENSG00000104756	7.49203	11.9714	7.75286	9.22362	11.1476	KCTD9	8	25427847	25458476	-	4383	protein_coding	potassium channel tetramerization domain containing 9 [Source:HGNC Symbol;Acc:HGNC:22401]	-
ENSG00000126453	6.2443	11.7959	6.05043	15.6541	11.7681	BCL2L12	19	49665142	49673916	+	2216	protein_coding	BCL2 like 12 [Source:HGNC Symbol;Acc:HGNC:13787]	-
ENSG00000268205	2.13399	5.05855	2.59819	6.10263	4.2802	AC005261.1	19	57304305	57308562	+	4258	lincRNA	novel transcript	-
ENSG00000103485	40.5986	24.8341	43.3646	28.6228	25.8928	QPRT	16	29679008	29698699	+	3642	protein_coding	quinolinate phosphoribosyltransferase [Source:HGNC Symbol;Acc:HGNC:9755]	-
ENSG00000005189	0.574142	1.92251	0.828973	1.73911	1.51092	REXO5	16	20806429	20849668	+	4114	protein_coding	RNA exonuclease 5 [Source:HGNC Symbol;Acc:HGNC:24661]	-
ENSG00000164754	17.7325	26.6247	21.8719	22.8975	26.2182	RAD21	8	116845935	116874866	-	6192	protein_coding	RAD21 cohesin complex component [Source:HGNC Symbol;Acc:HGNC:9811]	-
ENSG00000081913	0.242307	0.837239	0.386895	0.476216	0.736894	PHLPP1	18	62715450	62980433	+	9142	protein_coding	PH domain and leucine rich repeat protein phosphatase 1 [Source:HGNC Symbol;Acc:HGNC:20610]	-
ENSG00000162616	8.47112	13.6309	8.078	15.9944	15.414	DNAJB4	1	77979175	78017964	+	3783	protein_coding	DnaJ heat shock protein family (Hsp40) member B4 [Source:HGNC Symbol;Acc:HGNC:14886]	-
ENSG00000134871	60.6578	85.747	72.018	87.8141	92.8687	COL4A2	13	110305812	110513209	+	19293	protein_coding	collagen type IV alpha 2 chain [Source:HGNC Symbol;Acc:HGNC:2203]	-
ENSG00000053747	3.79683	2.269	5.15609	2.58206	2.99774	LAMA3	18	23689443	23956222	+	14678	protein_coding	laminin subunit alpha 3 [Source:HGNC Symbol;Acc:HGNC:6483]	-
ENSG00000273179	58.0773	26.9468	99.2705	29.8355	18.3266	AC092535.4	4	1167778	1168174	+	397	antisense	novel transcript, antisense to SPON2	-
ENSG00000120709	11.6589	7.44752	12.7251	6.17122	8.00164	FAM53C	5	138331935	138349729	+	7051	protein_coding	family with sequence similarity 53 member C [Source:HGNC Symbol;Acc:HGNC:1336]	-
ENSG00000099365	1.77974	3.78157	3.3192	4.13388	4.42697	STX1B	16	30989256	31010661	-	5229	protein_coding	syntaxin 1B [Source:HGNC Symbol;Acc:HGNC:18539]	-
ENSG00000196358	1.26739	0.434698	1.35321	0.401938	0.50025	NTNG2	9	132161676	132244534	+	7845	protein_coding	netrin G2 [Source:HGNC Symbol;Acc:HGNC:14288]	-
ENSG00000166575	5.4071	2.76015	4.3968	2.99257	3.45727	TMEM135	11	87037844	87323758	+	5030	protein_coding	transmembrane protein 135 [Source:HGNC Symbol;Acc:HGNC:26167]	-
ENSG00000178996	12.0856	7.88097	12.7369	8.71018	10.0054	SNX18	5	54517759	54546585	+	6653	protein_coding	sorting nexin 18 [Source:HGNC Symbol;Acc:HGNC:19245]	-
ENSG00000135636	1.33057	0.494082	1.29053	0.472192	0.591018	DYSF	2	71453722	71686768	+	8386	protein_coding	dysferlin [Source:HGNC Symbol;Acc:HGNC:3097]	-
ENSG00000146197	3.73459	6.42426	8.56366	7.38099	8.44247	SCUBE3	6	35214419	35253079	+	7356	protein_coding	signal peptide, CUB domain and EGF like domain containing 3 [Source:HGNC Symbol;Acc:HGNC:13655]	-
ENSG00000182379	4.1667	1.28635	4.63215	2.19031	1.61833	NXPH4	12	57216795	57226449	+	2150	protein_coding	neurexophilin 4 [Source:HGNC Symbol;Acc:HGNC:8078]	-
ENSG00000154305	10.0083	6.40322	8.86653	6.23609	7.01133	MIA3	1	222618086	222668012	+	10171	protein_coding	MIA SH3 domain ER export factor 3 [Source:HGNC Symbol;Acc:HGNC:24008]	-
ENSG00000163930	30.9223	21.4945	28.386	21.9333	22.221	BAP1	3	52401013	52410350	-	5055	protein_coding	BRCA1 associated protein 1 [Source:HGNC Symbol;Acc:HGNC:950]	-
ENSG00000155090	22.5922	13.3474	17.3343	15.0305	16.5012	KLF10	8	102648779	102655902	-	4003	protein_coding	Kruppel like factor 10 [Source:HGNC Symbol;Acc:HGNC:11810]	zf-C2H2
ENSG00000159461	33.9482	23.3302	26.9079	24.9534	25.3405	AMFR	16	56361452	56425538	-	5758	protein_coding	autocrine motility factor receptor [Source:HGNC Symbol;Acc:HGNC:463]	-
ENSG00000084693	9.31625	5.37375	11.212	5.80596	5.81773	AGBL5	2	27042364	27070622	+	5283	protein_coding	ATP/GTP binding protein like 5 [Source:HGNC Symbol;Acc:HGNC:26147]	-
ENSG00000148335	7.54962	12.5351	7.46946	14.6633	10.8107	NTMT1	9	129608884	129636131	+	3029	protein_coding	N-terminal Xaa-Pro-Lys N-methyltransferase 1 [Source:HGNC Symbol;Acc:HGNC:23373]	-
ENSG00000116096	26.8599	15.2373	22.2424	16.7921	13.7635	SPR	2	72887360	72892158	+	1480	protein_coding	sepiapterin reductase [Source:HGNC Symbol;Acc:HGNC:11257]	-
ENSG00000168672	1.52206	0.00398442	1.89051	0.0160054	0.00709848	FAM84B	8	126552442	126558393	-	5404	protein_coding	family with sequence similarity 84 member B [Source:HGNC Symbol;Acc:HGNC:24166]	-
ENSG00000152601	12.4437	18.5041	10.3114	17.7371	20.3044	MBNL1	3	152243828	152465780	+	9989	protein_coding	muscleblind like splicing regulator 1 [Source:HGNC Symbol;Acc:HGNC:6923]	-
ENSG00000181163	118.287	161.392	124.888	178.935	148.92	NPM1	5	171387116	171411137	+	3828	protein_coding	nucleophosmin 1 [Source:HGNC Symbol;Acc:HGNC:7910]	-
ENSG00000120693	7.23324	4.25811	10.5425	4.52035	5.55825	SMAD9	13	36844831	36920765	-	5723	protein_coding	SMAD family member 9 [Source:HGNC Symbol;Acc:HGNC:6774]	MH1
ENSG00000105856	8.88972	5.22848	14.5995	3.99424	4.66028	HBP1	7	107168961	107202529	+	6351	protein_coding	HMG-box transcription factor 1 [Source:HGNC Symbol;Acc:HGNC:23200]	HMG
ENSG00000166295	13.7989	8.09597	12.4922	10.7264	7.7737	ANAPC16	10	72216000	72235860	+	4324	protein_coding	anaphase promoting complex subunit 16 [Source:HGNC Symbol;Acc:HGNC:26976]	-
ENSG00000162458	32.8311	49.494	51.5542	58.7978	53.7088	FBLIM1	1	15756607	15786594	+	4716	protein_coding	filamin binding LIM protein 1 [Source:HGNC Symbol;Acc:HGNC:24686]	-
ENSG00000255112	24.1078	15.4414	27.1408	17.5013	16.2201	CHMP1B	18	11851396	11854449	+	3054	protein_coding	charged multivesicular body protein 1B [Source:HGNC Symbol;Acc:HGNC:24287]	-
ENSG00000081320	2.95426	5.12918	2.49178	4.08166	4.872	STK17B	2	196133566	196176503	-	6580	protein_coding	serine/threonine kinase 17b [Source:HGNC Symbol;Acc:HGNC:11396]	-
ENSG00000181523	16.1534	10.9817	16.9357	11.5778	11.2962	SGSH	17	80206716	80220923	-	6713	protein_coding	N-sulfoglucosamine sulfohydrolase [Source:HGNC Symbol;Acc:HGNC:10818]	-
ENSG00000181885	1.41737	0.115201	2.72419	0.458028	0.195796	CLDN7	17	7259903	7263983	-	2492	protein_coding	claudin 7 [Source:HGNC Symbol;Acc:HGNC:2049]	-
ENSG00000164985	6.36017	10.2894	6.48027	8.73144	10.2125	PSIP1	9	15464066	15511019	-	6768	protein_coding	PC4 and SFRS1 interacting protein 1 [Source:HGNC Symbol;Acc:HGNC:9527]	-
ENSG00000182253	1.04065	0.247035	0.555555	0.270381	0.247455	SYNM	15	99098217	99135593	+	7819	protein_coding	synemin [Source:HGNC Symbol;Acc:HGNC:24466]	-
ENSG00000158042	22.4871	35.8147	27.8197	44.0913	32.818	MRPL17	11	6680782	6683401	-	2276	protein_coding	mitochondrial ribosomal protein L17 [Source:HGNC Symbol;Acc:HGNC:14053]	-
ENSG00000122483	0.443578	1.43234	0.425261	1.32962	1.60021	CCDC18	1	93179919	93278730	+	5633	protein_coding	coiled-coil domain containing 18 [Source:HGNC Symbol;Acc:HGNC:30370]	-
ENSG00000116191	4.10377	6.55748	6.61086	5.89677	7.06167	RALGPS2	1	178725147	178921841	+	9178	protein_coding	Ral GEF with PH domain and SH3 binding motif 2 [Source:HGNC Symbol;Acc:HGNC:30279]	-
ENSG00000082482	0.225479	1.21645	0.32524	0.847405	1.24934	KCNK2	1	215005775	215237093	+	3910	protein_coding	potassium two pore domain channel subfamily K member 2 [Source:HGNC Symbol;Acc:HGNC:6277]	-
ENSG00000253958	9.21678	4.31393	10.2359	5.07199	3.95346	CLDN23	8	8701938	8704106	+	2169	protein_coding	claudin 23 [Source:HGNC Symbol;Acc:HGNC:17591]	-
ENSG00000025039	1.13579	0.235252	1.23507	0.284438	0.227958	RRAGD	6	89364636	89412270	-	5072	protein_coding	Ras related GTP binding D [Source:HGNC Symbol;Acc:HGNC:19903]	-
ENSG00000139318	5.05339	8.75676	4.2435	7.44975	9.1796	DUSP6	12	89347232	89353271	-	4632	protein_coding	dual specificity phosphatase 6 [Source:HGNC Symbol;Acc:HGNC:3072]	-
ENSG00000111897	113.558	82.933	130.674	78.616	85.7729	SERINC1	6	122443354	122471822	-	3137	protein_coding	serine incorporator 1 [Source:HGNC Symbol;Acc:HGNC:13464]	-
ENSG00000185379	0.854164	1.74231	0.777489	1.59138	1.44933	RAD51D	17	35092208	35121522	-	11304	protein_coding	RAD51 paralog D [Source:HGNC Symbol;Acc:HGNC:9823]	-
ENSG00000167861	0.780638	0.00964507	0.882776	0.0279812	0.0347167	HID1	17	74950743	74973166	-	6196	protein_coding	HID1 domain containing [Source:HGNC Symbol;Acc:HGNC:15736]	-
ENSG00000143028	3.66455	7.50252	2.1974	5.70609	6.76125	SYPL2	1	109466628	109482137	+	3963	protein_coding	synaptophysin like 2 [Source:HGNC Symbol;Acc:HGNC:27638]	-
ENSG00000017483	3.05992	6.56404	8.7869	6.89408	6.80564	SLC38A5	X	48458537	48470256	-	4014	protein_coding	solute carrier family 38 member 5 [Source:HGNC Symbol;Acc:HGNC:18070]	-
ENSG00000183386	8.93419	16.4136	13.8357	27.155	19.178	FHL3	1	37996770	38005606	-	2004	protein_coding	four and a half LIM domains 3 [Source:HGNC Symbol;Acc:HGNC:3704]	-
ENSG00000142192	289.683	217.439	326.108	206.608	223.781	APP	21	25880550	26171128	-	6316	protein_coding	amyloid beta precursor protein [Source:HGNC Symbol;Acc:HGNC:620]	-
ENSG00000163453	294.526	435.667	345.055	602.806	444.335	IGFBP7	4	57030773	57110385	-	1930	protein_coding	insulin like growth factor binding protein 7 [Source:HGNC Symbol;Acc:HGNC:5476]	-
ENSG00000121957	0.800215	1.83724	0.800652	1.14693	1.71373	GPSM2	1	108875350	108934545	+	9130	protein_coding	G protein signaling modulator 2 [Source:HGNC Symbol;Acc:HGNC:29501]	-
ENSG00000163017	0.108803	4.25082	0.182299	6.99832	4.6334	ACTG2	2	73892314	73919865	+	3811	protein_coding	actin, gamma 2, smooth muscle, enteric [Source:HGNC Symbol;Acc:HGNC:145]	-
ENSG00000110427	2.46031	4.24075	2.17098	2.51899	4.35577	KIAA1549L	11	33376466	33674102	+	13012	protein_coding	KIAA1549 like [Source:HGNC Symbol;Acc:HGNC:24836]	-
ENSG00000082497	1.00588	2.42534	0.863604	1.89667	2.3359	SERTAD4	1	210232799	210246631	+	5467	protein_coding	SERTA domain containing 4 [Source:HGNC Symbol;Acc:HGNC:25236]	-
ENSG00000110011	12.4225	6.87261	15.4593	9.59257	7.77909	DNAJC4	11	64230278	64234286	+	2807	protein_coding	DnaJ heat shock protein family (Hsp40) member C4 [Source:HGNC Symbol;Acc:HGNC:5271]	-
ENSG00000135253	0.815144	0.195243	1.73583	0.150064	0.223322	KCP	7	128862451	128910719	-	8259	protein_coding	kielin/chordin-like protein [Source:HGNC Symbol;Acc:HGNC:17585]	-
ENSG00000177042	6.7692	3.52687	7.76349	4.05801	3.59891	TMEM80	11	695428	705028	+	4071	protein_coding	transmembrane protein 80 [Source:HGNC Symbol;Acc:HGNC:27453]	-
ENSG00000155561	6.93729	11.0375	5.60661	8.39952	10.797	NUP205	7	135557919	135648757	+	7619	protein_coding	nucleoporin 205 [Source:HGNC Symbol;Acc:HGNC:18658]	-
ENSG00000186834	23.95	15.0032	19.9785	18.2697	14.6339	HEXIM1	17	45148502	45152101	+	3600	protein_coding	hexamethylene bisacetamide inducible 1 [Source:HGNC Symbol;Acc:HGNC:24953]	-
ENSG00000125319	0.748969	2.56227	1.3201	2.04274	2.28815	C17orf53	17	44141906	44162476	+	3005	protein_coding	chromosome 17 open reading frame 53 [Source:HGNC Symbol;Acc:HGNC:28460]	-
ENSG00000187514	105.325	151.36	137.78	167.471	139.497	PTMA	2	231706895	231713541	+	3378	protein_coding	prothymosin alpha [Source:HGNC Symbol;Acc:HGNC:9623]	-
ENSG00000147853	21.2191	13.8476	23.4848	16.2941	16.5119	AK3	9	4709559	4742043	-	4483	protein_coding	adenylate kinase 3 [Source:HGNC Symbol;Acc:HGNC:17376]	-
ENSG00000140941	47.3089	33.5788	42.3422	34.9	33.1222	MAP1LC3B	16	87383995	87404779	+	5313	protein_coding	microtubule associated protein 1 light chain 3 beta [Source:HGNC Symbol;Acc:HGNC:13352]	-
ENSG00000169992	30.553	20.9879	41.3809	20.9948	21.964	NLGN2	17	7404874	7419860	+	5550	protein_coding	neuroligin 2 [Source:HGNC Symbol;Acc:HGNC:14290]	-
ENSG00000136874	3.77522	1.76279	3.53765	1.26158	2.03403	STX17	9	99906633	99970341	+	4740	protein_coding	syntaxin 17 [Source:HGNC Symbol;Acc:HGNC:11432]	-
ENSG00000164929	1.76626	4.49535	3.12892	7.25769	5.1901	BAALC	8	103140710	103230305	+	3997	protein_coding	BAALC, MAP3K1 and KLF4 binding [Source:HGNC Symbol;Acc:HGNC:14333]	-
ENSG00000280435	1.40801	4.91024	1.10724	1.80917	3.50288	AC006058.4	3	44115818	44117487	-	1670	TEC	TEC	-
ENSG00000013523	5.87732	3.29626	4.09467	2.73786	3.4239	ANGEL1	14	76786178	76826246	-	6414	protein_coding	angel homolog 1 [Source:HGNC Symbol;Acc:HGNC:19961]	-
ENSG00000112578	9.17434	16.0912	6.80419	19.6607	16.3083	BYSL	6	41921188	41933046	+	2248	protein_coding	bystin like [Source:HGNC Symbol;Acc:HGNC:1157]	-
ENSG00000070087	52.917	37.3226	43.5144	38.6744	38.9289	PFN2	3	149964904	150050788	-	3709	protein_coding	profilin 2 [Source:HGNC Symbol;Acc:HGNC:8882]	-
ENSG00000164961	28.0145	19.0426	22.8357	15.5739	20.421	WASHC5	8	125024260	125091840	-	4784	protein_coding	WASH complex subunit 5 [Source:HGNC Symbol;Acc:HGNC:28984]	-
ENSG00000159399	17.9319	10.8179	51.5334	9.19222	11.1117	HK2	2	74833981	74893359	+	6064	protein_coding	hexokinase 2 [Source:HGNC Symbol;Acc:HGNC:4923]	-
ENSG00000197632	0.446676	2.30927	2.63713	2.09885	1.95108	SERPINB2	18	63871692	63903890	+	2748	protein_coding	serpin family B member 2 [Source:HGNC Symbol;Acc:HGNC:8584]	-
ENSG00000140743	7.31016	11.6516	5.23178	10.7281	11.3525	CDR2	16	22345936	22437165	-	3948	protein_coding	cerebellar degeneration related protein 2 [Source:HGNC Symbol;Acc:HGNC:1799]	-
ENSG00000103995	0.424028	1.26182	0.524972	0.94507	1.31162	CEP152	15	48712928	48811146	-	8168	protein_coding	centrosomal protein 152 [Source:HGNC Symbol;Acc:HGNC:29298]	-
ENSG00000077684	1.08327	2.15182	1.23215	1.93015	2.44432	JADE1	4	128809623	128875224	+	9129	protein_coding	jade family PHD finger 1 [Source:HGNC Symbol;Acc:HGNC:30027]	-
ENSG00000001617	4.23043	2.05475	4.09383	1.84915	2.00269	SEMA3F	3	50155045	50189075	+	4826	protein_coding	semaphorin 3F [Source:HGNC Symbol;Acc:HGNC:10728]	-
ENSG00000130299	3.32313	5.9686	3.37671	4.56959	4.85162	GTPBP3	19	17334920	17342735	+	4532	protein_coding	GTP binding protein 3, mitochondrial [Source:HGNC Symbol;Acc:HGNC:14880]	-
ENSG00000113810	5.51103	9.76117	7.38442	6.12841	10.8853	SMC4	3	160399274	160434962	+	8457	protein_coding	structural maintenance of chromosomes 4 [Source:HGNC Symbol;Acc:HGNC:14013]	-
ENSG00000114166	3.64619	1.74392	3.09106	1.69206	1.80151	KAT2B	3	20040023	20154404	+	5634	protein_coding	lysine acetyltransferase 2B [Source:HGNC Symbol;Acc:HGNC:8638]	-
ENSG00000159792	20.1655	12.6243	14.6915	12.5194	12.7908	PSKH1	16	67893272	67929678	+	3977	protein_coding	protein serine kinase H1 [Source:HGNC Symbol;Acc:HGNC:9529]	-
ENSG00000147471	8.22957	13.3187	6.85315	12.7059	14.1689	PLPBP	8	37762593	37779767	+	3428	protein_coding	pyridoxal phosphate binding protein [Source:HGNC Symbol;Acc:HGNC:9457]	-
ENSG00000090273	30.2615	44.3956	25.3047	53.0866	38.8884	NUDC	1	26900238	26946862	+	2856	protein_coding	nuclear distribution C, dynein complex regulator [Source:HGNC Symbol;Acc:HGNC:8045]	-
ENSG00000137337	2.49031	4.28917	2.42552	3.01061	3.82724	MDC1	6	30699807	30717889	-	8064	protein_coding	mediator of DNA damage checkpoint 1 [Source:HGNC Symbol;Acc:HGNC:21163]	-
ENSG00000101265	0.471394	1.4347	1.25025	1.46639	1.48523	RASSF2	20	4780023	4823645	-	5759	protein_coding	Ras association domain family member 2 [Source:HGNC Symbol;Acc:HGNC:9883]	-
ENSG00000117155	10.2935	14.9704	8.9916	13.5571	16.4574	SSX2IP	1	84643707	84690803	-	8639	protein_coding	SSX family member 2 interacting protein [Source:HGNC Symbol;Acc:HGNC:16509]	-
ENSG00000123352	6.82832	4.18266	7.4386	4.62858	5.01854	SPATS2	12	49366584	49527424	+	6840	protein_coding	spermatogenesis associated serine rich 2 [Source:HGNC Symbol;Acc:HGNC:18650]	-
ENSG00000106785	7.55347	4.28182	4.73896	4.28457	5.03322	TRIM14	9	98069275	98119212	-	5469	protein_coding	tripartite motif containing 14 [Source:HGNC Symbol;Acc:HGNC:16283]	-
ENSG00000188070	14.2755	9.33876	21.9767	7.29913	8.95015	C11orf95	11	63759892	63768775	-	5948	protein_coding	chromosome 11 open reading frame 95 [Source:HGNC Symbol;Acc:HGNC:28449]	-
ENSG00000006451	25.5354	36.7244	28.1909	29.0042	27.239	RALA	7	39623483	39708124	+	3665	protein_coding	RAS like proto-oncogene A [Source:HGNC Symbol;Acc:HGNC:9839]	-
ENSG00000070756	222.248	160.052	223.377	160.753	173.56	PABPC1	8	100685816	100722809	-	4752	protein_coding	poly(A) binding protein cytoplasmic 1 [Source:HGNC Symbol;Acc:HGNC:8554]	-
ENSG00000123213	3.91969	6.00391	2.7644	4.88594	6.15564	NLN	5	65722196	65871725	+	10948	protein_coding	neurolysin [Source:HGNC Symbol;Acc:HGNC:16058]	-
ENSG00000165804	6.55495	10.4256	11.9283	11.6671	11.2034	ZNF219	14	21090046	21104722	-	6679	protein_coding	zinc finger protein 219 [Source:HGNC Symbol;Acc:HGNC:13011]	zf-C2H2
ENSG00000137491	0.408213	0	0.120623	0	0.00797358	SLCO2B1	11	75100563	75206549	+	10351	protein_coding	solute carrier organic anion transporter family member 2B1 [Source:HGNC Symbol;Acc:HGNC:10962]	-
ENSG00000111445	2.52004	5.46722	2.21629	4.34071	5.22183	RFC5	12	118013588	118033130	+	3249	protein_coding	replication factor C subunit 5 [Source:HGNC Symbol;Acc:HGNC:9973]	-
ENSG00000163399	40.4428	28.7756	43.6169	26.9547	32.3667	ATP1A1	1	116372668	116410261	+	7261	protein_coding	ATPase Na+/K+ transporting subunit alpha 1 [Source:HGNC Symbol;Acc:HGNC:799]	-
ENSG00000136891	4.90523	7.77496	4.50175	6.52253	7.77966	TEX10	9	100302077	100352939	-	7261	protein_coding	testis expressed 10 [Source:HGNC Symbol;Acc:HGNC:25988]	-
ENSG00000164823	10.3221	6.11674	8.86893	7.11772	7.56065	OSGIN2	8	89901849	89927888	+	4691	protein_coding	oxidative stress induced growth inhibitor family member 2 [Source:HGNC Symbol;Acc:HGNC:1355]	-
ENSG00000132017	8.16821	13.6751	10.6256	13.158	12.5363	DCAF15	19	13952492	13961449	+	2961	protein_coding	DDB1 and CUL4 associated factor 15 [Source:HGNC Symbol;Acc:HGNC:25095]	-
ENSG00000137764	4.53284	2.34483	4.26477	2.86496	2.51515	MAP2K5	15	67542709	67807123	+	5031	protein_coding	mitogen-activated protein kinase kinase 5 [Source:HGNC Symbol;Acc:HGNC:6845]	-
ENSG00000143368	42.7763	62.3534	34.5198	46.5133	56.4317	SF3B4	1	149923317	149928344	-	2245	protein_coding	splicing factor 3b subunit 4 [Source:HGNC Symbol;Acc:HGNC:10771]	-
ENSG00000176953	5.80919	9.84032	6.00618	7.18851	8.62912	NFATC2IP	16	28950807	28967097	+	5738	protein_coding	nuclear factor of activated T cells 2 interacting protein [Source:HGNC Symbol;Acc:HGNC:25906]	-
ENSG00000122694	17.1505	27.8322	20.2722	40.0593	29.9194	GLIPR2	9	36136536	36163913	+	3055	protein_coding	GLI pathogenesis related 2 [Source:HGNC Symbol;Acc:HGNC:18007]	-
ENSG00000223496	6.37645	10.2286	4.81969	9.98828	10.1082	EXOSC6	16	70246778	70251930	-	5153	protein_coding	exosome component 6 [Source:HGNC Symbol;Acc:HGNC:19055]	-
ENSG00000112308	61.3172	41.1941	50.0911	45.5203	43.848	C6orf62	6	24704861	24720836	-	4134	protein_coding	chromosome 6 open reading frame 62 [Source:HGNC Symbol;Acc:HGNC:20998]	-
ENSG00000122642	83.4264	60.5757	95.5488	58.8627	62.2847	FKBP9	7	32957404	33006931	+	5170	protein_coding	FK506 binding protein 9 [Source:HGNC Symbol;Acc:HGNC:3725]	-
ENSG00000124789	9.20373	13.6971	8.68047	11.9462	15.2684	NUP153	6	17615035	17706834	-	6030	protein_coding	nucleoporin 153 [Source:HGNC Symbol;Acc:HGNC:8062]	-
ENSG00000041353	5.20889	2.92564	2.98308	1.70603	2.5987	RAB27B	18	54717860	54895516	+	7432	protein_coding	RAB27B, member RAS oncogene family [Source:HGNC Symbol;Acc:HGNC:9767]	-
ENSG00000110046	12.2414	7.86257	11.3769	7.45293	7.6648	ATG2A	11	64894546	64917248	-	7870	protein_coding	autophagy related 2A [Source:HGNC Symbol;Acc:HGNC:29028]	-
ENSG00000156011	6.29134	3.87433	13.1039	4.26331	5.20292	PSD3	8	18527301	19084730	-	15213	protein_coding	pleckstrin and Sec7 domain containing 3 [Source:HGNC Symbol;Acc:HGNC:19093]	-
ENSG00000229180	1.32898	2.48448	1.2843	2.45492	2.36299	AC006001.3	7	66526088	66592397	-	10101	transcribed_unprocessed_pseudogene	RAB guanine nucleotide exchange factor (GEF) 1 (RABGEF1) pseudogene	-
ENSG00000108828	265.07	196.296	290.219	178.554	193.402	VAT1	17	43014605	43025123	-	3501	protein_coding	vesicle amine transport 1 [Source:HGNC Symbol;Acc:HGNC:16919]	-
ENSG00000185475	28.2704	16.2176	30.7735	22.557	19.2534	TMEM179B	11	62787415	62790405	+	1496	protein_coding	transmembrane protein 179B [Source:HGNC Symbol;Acc:HGNC:33744]	-
ENSG00000184898	5.01011	2.27042	5.64772	2.16987	2.42119	RBM43	2	151247940	151261879	-	4717	protein_coding	RNA binding motif protein 43 [Source:HGNC Symbol;Acc:HGNC:24790]	-
ENSG00000164430	1.64754	3.66339	0.950463	3.93357	3.23425	CGAS	6	73413515	73452276	-	4155	protein_coding	cyclic GMP-AMP synthase [Source:HGNC Symbol;Acc:HGNC:21367]	-
ENSG00000167842	3.25599	6.38227	2.87482	5.91161	5.88172	MIS12	17	5486285	5490814	+	3157	protein_coding	MIS12, kinetochore complex component [Source:HGNC Symbol;Acc:HGNC:24967]	-
ENSG00000108561	40.1913	58.5694	29.1526	61.2008	52.9402	C1QBP	17	5432777	5448830	-	2335	protein_coding	complement C1q binding protein [Source:HGNC Symbol;Acc:HGNC:1243]	-
ENSG00000151148	7.38495	4.92752	6.12138	4.26971	5.20932	UBE3B	12	109477402	109536705	+	12453	protein_coding	ubiquitin protein ligase E3B [Source:HGNC Symbol;Acc:HGNC:13478]	-
ENSG00000103381	6.18534	9.56463	6.86975	9.02829	9.55597	CPPED1	16	12659799	12804017	-	6484	protein_coding	calcineurin like phosphoesterase domain containing 1 [Source:HGNC Symbol;Acc:HGNC:25632]	-
ENSG00000159714	10.1984	5.65402	11.5687	9.8735	6.3841	ZDHHC1	16	67394152	67416833	-	3540	protein_coding	zinc finger DHHC-type containing 1 [Source:HGNC Symbol;Acc:HGNC:17916]	-
ENSG00000012963	7.15778	12.3109	5.81271	8.82615	10.85	UBR7	14	93207056	93229215	+	3694	protein_coding	ubiquitin protein ligase E3 component n-recognin 7 (putative) [Source:HGNC Symbol;Acc:HGNC:20344]	-
ENSG00000130695	1.49001	3.13246	0.744727	2.25994	3.14837	CEP85	1	26234200	26278808	+	5145	protein_coding	centrosomal protein 85 [Source:HGNC Symbol;Acc:HGNC:25309]	-
ENSG00000172893	72.3203	46.3555	42.714	27.3823	50.0856	DHCR7	11	71428193	71452868	-	4160	protein_coding	7-dehydrocholesterol reductase [Source:HGNC Symbol;Acc:HGNC:2860]	-
ENSG00000105447	7.93515	11.9339	5.19336	12.7179	12.4182	GRWD1	19	48445773	48457022	+	5763	protein_coding	glutamate rich WD repeat containing 1 [Source:HGNC Symbol;Acc:HGNC:21270]	-
ENSG00000135052	16.4345	10.3873	15.1052	10.5278	10.3308	GOLM1	9	86026146	86100173	-	4233	protein_coding	golgi membrane protein 1 [Source:HGNC Symbol;Acc:HGNC:15451]	-
ENSG00000096696	19.3401	26.8322	46.3588	30.9952	32.437	DSP	6	7541575	7586717	+	10093	protein_coding	desmoplakin [Source:HGNC Symbol;Acc:HGNC:3052]	-
ENSG00000181222	52.042	33.8411	50.7052	28.2414	33.454	POLR2A	17	7484366	7514616	+	8355	protein_coding	RNA polymerase II subunit A [Source:HGNC Symbol;Acc:HGNC:9187]	-
ENSG00000006625	3.8333	9.09541	3.19984	11.3407	7.66992	GGCT	7	30496621	30504844	-	1597	protein_coding	gamma-glutamylcyclotransferase [Source:HGNC Symbol;Acc:HGNC:21705]	-
ENSG00000185761	5.41066	9.46652	6.74987	8.66008	9.12768	ADAMTSL5	19	1505018	1513604	-	3625	protein_coding	ADAMTS like 5 [Source:HGNC Symbol;Acc:HGNC:27912]	-
ENSG00000114942	100.607	140.747	111.892	182.328	124.588	EEF1B2	2	206159585	206162928	+	1915	protein_coding	eukaryotic translation elongation factor 1 beta 2 [Source:HGNC Symbol;Acc:HGNC:3208]	-
ENSG00000123643	4.11086	6.86378	3.35908	5.45163	7.50222	SLC36A1	5	151437046	151492381	+	6980	protein_coding	solute carrier family 36 member 1 [Source:HGNC Symbol;Acc:HGNC:18761]	-
ENSG00000119318	36.541	51.4132	33.4558	42.1935	49.2578	RAD23B	9	107283137	107332194	+	4615	protein_coding	RAD23 homolog B, nucleotide excision repair protein [Source:HGNC Symbol;Acc:HGNC:9813]	-
ENSG00000185722	10.3509	6.41576	7.80432	5.59137	7.07349	ANKFY1	17	4163907	4263995	-	14138	protein_coding	ankyrin repeat and FYVE domain containing 1 [Source:HGNC Symbol;Acc:HGNC:20763]	-
ENSG00000156398	0.0936382	0.558472	0.123625	0.319566	0.428305	SFXN2	10	102714538	102743492	+	8034	protein_coding	sideroflexin 2 [Source:HGNC Symbol;Acc:HGNC:16086]	-
ENSG00000115255	3.56694	1.09712	3.13739	1.70117	1.32264	REEP6	19	1490747	1497927	+	2449	protein_coding	receptor accessory protein 6 [Source:HGNC Symbol;Acc:HGNC:30078]	-
ENSG00000131370	3.67407	1.62989	5.86736	1.98702	2.26293	SH3BP5	3	15254853	15341368	-	4159	protein_coding	SH3 domain binding protein 5 [Source:HGNC Symbol;Acc:HGNC:10827]	-
ENSG00000106049	30.282	19.0034	30.4352	20.6783	20.9575	HIBADH	7	27525442	27662995	-	2323	protein_coding	3-hydroxyisobutyrate dehydrogenase [Source:HGNC Symbol;Acc:HGNC:4907]	-
ENSG00000134215	0.671257	0.122911	0.761083	0.122726	0.137178	VAV3	1	107571160	107965144	-	7271	protein_coding	vav guanine nucleotide exchange factor 3 [Source:HGNC Symbol;Acc:HGNC:12659]	-
ENSG00000068745	14.3715	9.20194	22.1192	11.1606	8.24828	IP6K2	3	48688003	48740353	-	5624	protein_coding	inositol hexakisphosphate kinase 2 [Source:HGNC Symbol;Acc:HGNC:17313]	-
ENSG00000092931	6.66423	3.96115	4.90566	4.09981	4.13698	MFSD11	17	76735865	76781449	+	6587	protein_coding	major facilitator superfamily domain containing 11 [Source:HGNC Symbol;Acc:HGNC:25458]	-
ENSG00000106780	6.07043	3.3001	5.48337	3.11341	3.75204	MEGF9	9	120600813	120714470	-	6298	protein_coding	multiple EGF like domains 9 [Source:HGNC Symbol;Acc:HGNC:3234]	-
ENSG00000134001	14.2969	20.9147	10.2859	21.3952	20.391	EIF2S1	14	67359997	67386516	+	5651	protein_coding	eukaryotic translation initiation factor 2 subunit alpha [Source:HGNC Symbol;Acc:HGNC:3265]	-
ENSG00000158163	1.27536	3.08111	1.68049	2.35247	2.65586	DZIP1L	3	138061990	138115818	-	5045	protein_coding	DAZ interacting zinc finger protein 1 like [Source:HGNC Symbol;Acc:HGNC:26551]	-
ENSG00000166228	19.889	10.5866	17.6246	13.4648	11.5464	PCBD1	10	70882280	70888784	-	1614	protein_coding	pterin-4 alpha-carbinolamine dehydratase 1 [Source:HGNC Symbol;Acc:HGNC:8646]	-
ENSG00000124126	5.46447	2.78515	5.80476	2.61475	3.10438	PREX1	20	48624252	48827883	-	7393	protein_coding	phosphatidylinositol-3,4,5-trisphosphate dependent Rac exchange factor 1 [Source:HGNC Symbol;Acc:HGNC:32594]	-
ENSG00000185838	1.35518	2.79506	0.650689	3.59398	2.74393	GNB1L	22	19783224	19854939	-	6988	protein_coding	G protein subunit beta 1 like [Source:HGNC Symbol;Acc:HGNC:4397]	-
ENSG00000278540	11.5177	7.21452	9.45613	5.11115	7.64684	ACACA	17	37084988	37406818	-	13008	protein_coding	acetyl-CoA carboxylase alpha [Source:HGNC Symbol;Acc:HGNC:84]	-
ENSG00000131591	2.23374	4.02067	2.60954	3.73732	3.44237	C1orf159	1	1081818	1116361	-	6322	protein_coding	chromosome 1 open reading frame 159 [Source:HGNC Symbol;Acc:HGNC:26062]	-
ENSG00000090661	3.31519	1.39174	4.32301	1.61437	1.30667	CERS4	19	8206736	8262421	+	4059	protein_coding	ceramide synthase 4 [Source:HGNC Symbol;Acc:HGNC:23747]	Homeobox
ENSG00000251493	13.0377	22.2038	14.7826	18.9756	23.366	FOXD1	5	73444827	73448527	-	2623	protein_coding	forkhead box D1 [Source:HGNC Symbol;Acc:HGNC:3802]	Fork
ENSG00000120334	1.06483	2.49467	1.13338	2.10858	2.46767	CENPL	1	173799550	173824720	-	4914	protein_coding	centromere protein L [Source:HGNC Symbol;Acc:HGNC:17879]	-
ENSG00000166226	39.5541	53.6902	24.483	52.05	50.4503	CCT2	12	69585334	69601570	+	4322	protein_coding	chaperonin containing TCP1 subunit 2 [Source:HGNC Symbol;Acc:HGNC:1615]	-
ENSG00000108055	10.7816	16.9986	10.4799	14.6611	16.281	SMC3	10	110567691	110604636	+	4275	protein_coding	structural maintenance of chromosomes 3 [Source:HGNC Symbol;Acc:HGNC:2468]	-
ENSG00000050426	7.52453	4.64741	8.38891	5.59207	5.06015	LETMD1	12	51047962	51060424	+	6032	protein_coding	LETM1 domain containing 1 [Source:HGNC Symbol;Acc:HGNC:24241]	-
ENSG00000172939	8.67532	13.0429	8.42334	10.6485	12.7086	OXSR1	3	38165089	38255488	+	6075	protein_coding	oxidative stress responsive 1 [Source:HGNC Symbol;Acc:HGNC:8508]	-
ENSG00000231991	74.3563	111.566	98.5396	115.543	103.737	ANXA2P2	9	33624274	33625293	+	1020	processed_pseudogene	annexin A2 pseudogene 2 [Source:HGNC Symbol;Acc:HGNC:539]	-
ENSG00000082781	119.454	84.7003	129.595	86.4087	87.0968	ITGB5	3	124761948	124901418	-	6447	protein_coding	integrin subunit beta 5 [Source:HGNC Symbol;Acc:HGNC:6160]	-
ENSG00000157150	3.88561	1.02411	4.1068	1.5173	1.37229	TIMP4	3	12153051	12159351	-	1650	protein_coding	TIMP metallopeptidase inhibitor 4 [Source:HGNC Symbol;Acc:HGNC:11823]	-
ENSG00000124191	11.8561	18.6673	12.9645	19.893	19.9216	TOX2	20	43914864	44069616	+	3223	protein_coding	TOX high mobility group box family member 2 [Source:HGNC Symbol;Acc:HGNC:16095]	HMG
ENSG00000077152	2.32202	6.40724	1.7881	6.10044	5.79574	UBE2T	1	202331657	202341980	-	1652	protein_coding	ubiquitin conjugating enzyme E2 T [Source:HGNC Symbol;Acc:HGNC:25009]	-
ENSG00000143398	11.17	16.7199	8.84236	12.4413	15.9697	PIP5K1A	1	151197949	151249536	+	5405	protein_coding	phosphatidylinositol-4-phosphate 5-kinase type 1 alpha [Source:HGNC Symbol;Acc:HGNC:8994]	-
ENSG00000072786	6.12335	9.279	6.00252	8.56946	9.87483	STK10	5	172042073	172188386	-	9083	protein_coding	serine/threonine kinase 10 [Source:HGNC Symbol;Acc:HGNC:11388]	-
ENSG00000130921	2.98521	4.99029	4.08444	4.70039	4.59071	C12orf65	12	123232916	123257959	+	7090	protein_coding	chromosome 12 open reading frame 65 [Source:HGNC Symbol;Acc:HGNC:26784]	-
ENSG00000175305	0.541919	1.77021	0.461983	1.17355	1.99031	CCNE2	8	94879770	94896678	-	4397	protein_coding	cyclin E2 [Source:HGNC Symbol;Acc:HGNC:1590]	-
ENSG00000076928	9.82678	14.6206	10.1587	14.2224	13.7974	ARHGEF1	19	41883161	41930150	+	8636	protein_coding	Rho guanine nucleotide exchange factor 1 [Source:HGNC Symbol;Acc:HGNC:681]	-
ENSG00000107551	0.899183	0.258356	1.30992	0.546314	0.402368	RASSF4	10	44959407	44995891	+	9481	protein_coding	Ras association domain family member 4 [Source:HGNC Symbol;Acc:HGNC:20793]	-
ENSG00000173905	25.6336	36.052	24.4821	32.4331	38.2148	GOLIM4	3	168008677	168095975	-	4647	protein_coding	golgi integral membrane protein 4 [Source:HGNC Symbol;Acc:HGNC:15448]	-
ENSG00000260196	0.704567	2.3508	0.531752	1.88841	2.06837	AC124798.1	11	17380649	17383531	+	2883	antisense	antisense to KCNJ11 and overlapping to a novel gene	-
ENSG00000062725	8.47128	5.42511	8.17215	4.69736	5.40291	APPBP2	17	60443149	60526219	-	9876	protein_coding	amyloid beta precursor protein binding protein 2 [Source:HGNC Symbol;Acc:HGNC:622]	-
ENSG00000236675	30.5154	12.1903	26.9972	6.67	10.1218	MTX1P1	1	155230975	155234325	+	838	unprocessed_pseudogene	metaxin 1 pseudogene 1 [Source:HGNC Symbol;Acc:HGNC:7505]	-
ENSG00000270231	1.76914	3.7294	1.78987	2.68673	3.24189	NBPF8	1	120436353	120467739	+	5330	unprocessed_pseudogene	NBPF member 8 [Source:HGNC Symbol;Acc:HGNC:31990]	-
ENSG00000133657	7.47463	11.6751	6.06201	8.40466	12.1311	ATP13A3	3	194402672	194498364	-	13254	protein_coding	ATPase 13A3 [Source:HGNC Symbol;Acc:HGNC:24113]	-
ENSG00000023041	5.33002	9.23585	4.85869	8.4853	9.00498	ZDHHC6	10	112424428	112446917	-	3748	protein_coding	zinc finger DHHC-type containing 6 [Source:HGNC Symbol;Acc:HGNC:19160]	-
ENSG00000137414	14.2599	9.00158	10.7235	8.91778	9.90128	FAM8A1	6	17600355	17611719	+	4677	protein_coding	family with sequence similarity 8 member A1 [Source:HGNC Symbol;Acc:HGNC:16372]	-
ENSG00000075223	24.5772	34.0103	25.097	35.131	41.1997	SEMA3C	7	80742538	80922359	-	6268	protein_coding	semaphorin 3C [Source:HGNC Symbol;Acc:HGNC:10725]	-
ENSG00000077549	98.0524	137.72	124.848	157.68	136.859	CAPZB	1	19338776	19485539	-	3238	protein_coding	capping actin protein of muscle Z-line subunit beta [Source:HGNC Symbol;Acc:HGNC:1491]	-
ENSG00000181773	0.818598	2.9853	0.649927	2.01334	2.92581	GPR3	1	27392644	27395814	+	2115	protein_coding	G protein-coupled receptor 3 [Source:HGNC Symbol;Acc:HGNC:4484]	-
ENSG00000136830	115.866	162.824	133.04	176.981	156.969	FAM129B	9	127505339	127578989	-	4629	protein_coding	family with sequence similarity 129 member B [Source:HGNC Symbol;Acc:HGNC:25282]	-
ENSG00000172936	15.0586	9.48868	13.5581	9.19117	9.68323	MYD88	3	38138478	38143022	+	3989	protein_coding	MYD88, innate immune signal transduction adaptor [Source:HGNC Symbol;Acc:HGNC:7562]	-
ENSG00000107537	16.9362	10.7271	16.607	12.8958	11.481	PHYH	10	13277796	13302412	-	3381	protein_coding	phytanoyl-CoA 2-hydroxylase [Source:HGNC Symbol;Acc:HGNC:8940]	-
ENSG00000102763	4.26657	2.36292	3.17889	2.12481	2.90625	VWA8	13	41566837	41961120	-	7633	protein_coding	von Willebrand factor A domain containing 8 [Source:HGNC Symbol;Acc:HGNC:29071]	-
ENSG00000108443	5.99316	3.47338	5.05753	3.86267	4.26148	RPS6KB1	17	59893046	59950564	+	7687	protein_coding	ribosomal protein S6 kinase B1 [Source:HGNC Symbol;Acc:HGNC:10436]	-
ENSG00000065361	0.460449	0.00661145	0.491471	0.0146856	0.00705387	ERBB3	12	56076799	56103505	+	9039	protein_coding	erb-b2 receptor tyrosine kinase 3 [Source:HGNC Symbol;Acc:HGNC:3431]	-
ENSG00000107185	9.17483	5.58026	8.63157	5.12443	6.28198	RGP1	9	35749287	35758575	+	7116	protein_coding	RGP1 homolog, RAB6A GEF complex partner 1 [Source:HGNC Symbol;Acc:HGNC:21965]	-
ENSG00000196715	8.38262	12.3318	4.73755	12.2807	13.4024	VKORC1L1	7	65873166	65959563	+	6000	protein_coding	vitamin K epoxide reductase complex subunit 1 like 1 [Source:HGNC Symbol;Acc:HGNC:21492]	-
ENSG00000177192	3.85031	6.44842	2.22034	7.78701	6.03867	PUS1	12	131929200	131945896	+	5732	protein_coding	pseudouridylate synthase 1 [Source:HGNC Symbol;Acc:HGNC:15508]	-
ENSG00000198786	2053.08	1297.54	1840.07	1123.19	1399.16	MT-ND5	MT	12337	14148	+	1812	protein_coding	mitochondrially encoded NADH:ubiquinone oxidoreductase core subunit 5 [Source:HGNC Symbol;Acc:HGNC:7461]	-
ENSG00000075131	1.75443	4.19852	1.0125	4.39482	3.89517	TIPIN	15	66336206	66386746	-	2755	protein_coding	TIMELESS interacting protein [Source:HGNC Symbol;Acc:HGNC:30750]	-
ENSG00000096060	0.536456	1.25906	0.393309	1.02675	1.25729	FKBP5	6	35573585	35728583	-	10628	protein_coding	FK506 binding protein 5 [Source:HGNC Symbol;Acc:HGNC:3721]	-
ENSG00000113649	5.07791	7.95381	4.69061	7.11283	8.41483	TCERG1	5	146447311	146511961	+	8714	protein_coding	transcription elongation regulator 1 [Source:HGNC Symbol;Acc:HGNC:15630]	-
ENSG00000276023	26.4621	40.3144	17.2711	36.0039	38.1913	DUSP14	17	37489831	37513501	+	2499	protein_coding	dual specificity phosphatase 14 [Source:HGNC Symbol;Acc:HGNC:17007]	-
ENSG00000165272	1.32177	0.17353	2.97755	0.288903	0.210498	AQP3	9	33441154	33447633	-	2950	protein_coding	aquaporin 3 (Gill blood group) [Source:HGNC Symbol;Acc:HGNC:636]	-
ENSG00000148358	21.5635	14.5961	18.98	13.1912	15.3603	GPR107	9	130053426	130140169	+	9139	protein_coding	G protein-coupled receptor 107 [Source:HGNC Symbol;Acc:HGNC:17830]	-
ENSG00000101665	20.9551	13.9508	24.6285	16.8035	16.8179	SMAD7	18	48919853	48952052	-	5033	protein_coding	SMAD family member 7 [Source:HGNC Symbol;Acc:HGNC:6773]	MH1
ENSG00000103522	1.55139	0.379117	3.2887	0.652559	0.30634	IL21R	16	27402162	27452042	+	5467	protein_coding	interleukin 21 receptor [Source:HGNC Symbol;Acc:HGNC:6006]	-
ENSG00000155363	13.3273	8.85596	14.1316	9.31655	8.70653	MOV10	1	112673141	112700746	+	6509	protein_coding	Mov10 RISC complex RNA helicase [Source:HGNC Symbol;Acc:HGNC:7200]	-
ENSG00000182718	144.879	206.86	171.367	238.122	193.977	ANXA2	15	60347134	60402883	-	8824	protein_coding	annexin A2 [Source:HGNC Symbol;Acc:HGNC:537]	-
ENSG00000109654	6.17477	3.62325	5.72636	2.80993	4.06108	TRIM2	4	153152342	153339320	+	9425	protein_coding	tripartite motif containing 2 [Source:HGNC Symbol;Acc:HGNC:15974]	-
ENSG00000067560	225.58	308.507	234.912	347.794	302.881	RHOA	3	49359145	49412998	-	2582	protein_coding	ras homolog family member A [Source:HGNC Symbol;Acc:HGNC:667]	-
ENSG00000101856	143.302	103.83	144.873	125.547	111.883	PGRMC1	X	119236245	119244466	+	1919	protein_coding	progesterone receptor membrane component 1 [Source:HGNC Symbol;Acc:HGNC:16090]	-
ENSG00000170004	17.3219	23.5293	29.8763	23.3193	23.8179	CHD3	17	7884806	7912760	+	9758	protein_coding	chromodomain helicase DNA binding protein 3 [Source:HGNC Symbol;Acc:HGNC:1918]	-
ENSG00000175416	45.7602	70.7337	42.7691	88.2784	62.334	CLTB	5	176392455	176416569	-	2039	protein_coding	clathrin light chain B [Source:HGNC Symbol;Acc:HGNC:2091]	-
ENSG00000166165	13.5457	7.034	22.8014	11.1649	6.95029	CKB	14	103519659	103523111	-	2669	protein_coding	creatine kinase B [Source:HGNC Symbol;Acc:HGNC:1991]	-
ENSG00000049130	8.90765	13.6909	8.26329	17.0775	20.3621	KITLG	12	88492793	88580851	-	6205	protein_coding	KIT ligand [Source:HGNC Symbol;Acc:HGNC:6343]	-
ENSG00000148158	6.2366	3.62003	5.56614	3.73658	4.34721	SNX30	9	112750838	112881671	+	11578	protein_coding	sorting nexin family member 30 [Source:HGNC Symbol;Acc:HGNC:23685]	-
ENSG00000022840	37.6736	26.8316	25.6684	26.7834	27.9806	RNF10	12	120533480	120577594	+	5911	protein_coding	ring finger protein 10 [Source:HGNC Symbol;Acc:HGNC:10055]	-
ENSG00000260032	109.173	73.5784	132.416	66.5763	78.5508	NORAD	20	36045622	36050960	-	5339	lincRNA	non-coding RNA activated by DNA damage [Source:HGNC Symbol;Acc:HGNC:44311]	-
ENSG00000146067	4.63691	7.60655	7.78354	7.09474	6.635	FAM193B	5	177519788	177554541	-	5804	protein_coding	family with sequence similarity 193 member B [Source:HGNC Symbol;Acc:HGNC:25524]	-
ENSG00000118898	0.518041	0.0638738	1.21634	0.146461	0.0838857	PPL	16	4882507	4960741	-	7686	protein_coding	periplakin [Source:HGNC Symbol;Acc:HGNC:9273]	-
ENSG00000125868	119.014	161.53	116.402	202.176	167.265	DSTN	20	17569863	17609919	+	3851	protein_coding	destrin, actin depolymerizing factor [Source:HGNC Symbol;Acc:HGNC:15750]	-
ENSG00000111110	2.41191	1.12939	2.43592	1.30671	1.57004	PPM1H	12	62643982	62935037	-	7063	protein_coding	protein phosphatase, Mg2+/Mn2+ dependent 1H [Source:HGNC Symbol;Acc:HGNC:18583]	-
ENSG00000267317	11.0386	3.84564	6.08342	5.42534	5.26924	AC027307.2	19	1457670	1458580	-	911	antisense	novel transcript, antisense to APC2	-
ENSG00000158747	93.7351	61.0797	117.025	92.4691	53.1367	NBL1	1	19596979	19658456	+	3596	protein_coding	NBL1, DAN family BMP antagonist [Source:HGNC Symbol;Acc:HGNC:7650]	-
ENSG00000197780	28.3698	43.577	17.7951	52.1558	40.9757	TAF13	1	109062486	109076002	-	1400	protein_coding	TATA-box binding protein associated factor 13 [Source:HGNC Symbol;Acc:HGNC:11546]	-
ENSG00000198839	4.84471	2.37223	4.84091	3.03975	2.75546	ZNF277	7	112206588	112343096	+	4014	protein_coding	zinc finger protein 277 [Source:HGNC Symbol;Acc:HGNC:13070]	-
ENSG00000162643	1.63727	0.366171	2.19095	0.435807	0.623762	WDR63	1	84999147	85133138	+	3923	protein_coding	WD repeat domain 63 [Source:HGNC Symbol;Acc:HGNC:30711]	-
ENSG00000104897	10.8939	19.171	16.6105	15.1326	15.9176	SF3A2	19	2236504	2248679	+	3134	protein_coding	splicing factor 3a subunit 2 [Source:HGNC Symbol;Acc:HGNC:10766]	-
ENSG00000088205	6.88354	10.3604	5.27484	9.86095	11.0218	DDX18	2	117814650	117832379	+	7851	protein_coding	DEAD-box helicase 18 [Source:HGNC Symbol;Acc:HGNC:2741]	-
ENSG00000243927	16.9239	28.1856	40.5025	35.3454	24.9044	MRPS6	21	34073224	34143034	+	4299	protein_coding	mitochondrial ribosomal protein S6 [Source:HGNC Symbol;Acc:HGNC:14051]	-
ENSG00000172986	1.85988	0.457426	2.04792	0.687752	0.61681	GXYLT2	3	72888073	72998138	+	3667	protein_coding	glucoside xylosyltransferase 2 [Source:HGNC Symbol;Acc:HGNC:33383]	-
ENSG00000196975	12.485	8.63884	12.2296	8.99959	8.5191	ANXA4	2	69644425	69827100	+	11048	protein_coding	annexin A4 [Source:HGNC Symbol;Acc:HGNC:542]	-
ENSG00000157823	3.23396	1.81556	2.57171	1.81756	1.89359	AP3S2	15	89830599	89894638	-	9237	protein_coding	adaptor related protein complex 3 subunit sigma 2 [Source:HGNC Symbol;Acc:HGNC:571]	-
ENSG00000120915	0.86426	0.113827	0.869242	0.248943	0.112565	EPHX2	8	27490779	27545564	+	4473	protein_coding	epoxide hydrolase 2 [Source:HGNC Symbol;Acc:HGNC:3402]	-
ENSG00000111711	12.4955	19.7757	11.4592	20.433	20.5607	GOLT1B	12	21501781	21518408	+	3789	protein_coding	golgi transport 1B [Source:HGNC Symbol;Acc:HGNC:20175]	-
ENSG00000187790	0.449016	1.2515	0.45279	0.969987	1.45308	FANCM	14	45135940	45200890	+	8468	protein_coding	FA complementation group M [Source:HGNC Symbol;Acc:HGNC:23168]	-
ENSG00000131462	21.85	33.6274	13.7377	29.6627	29.0659	TUBG1	17	42609676	42615234	+	2411	protein_coding	tubulin gamma 1 [Source:HGNC Symbol;Acc:HGNC:12417]	-
ENSG00000092010	52.3315	35.4247	57.7693	50.8902	32.8298	PSME1	14	24136158	24138967	+	1781	protein_coding	proteasome activator subunit 1 [Source:HGNC Symbol;Acc:HGNC:9568]	-
ENSG00000186318	17.3726	11.6623	15.2645	10.3909	12.5829	BACE1	11	117285207	117316259	-	7190	protein_coding	beta-secretase 1 [Source:HGNC Symbol;Acc:HGNC:933]	-
ENSG00000058799	14.4281	7.69009	10.7853	11.1901	8.70844	YIPF1	1	53851719	53889834	-	2072	protein_coding	Yip1 domain family member 1 [Source:HGNC Symbol;Acc:HGNC:25231]	-
ENSG00000182870	0.656941	0.101124	0.454722	0.233752	0.276585	GALNT9	12	132196372	132329349	-	6969	protein_coding	polypeptide N-acetylgalactosaminyltransferase 9 [Source:HGNC Symbol;Acc:HGNC:4131]	-
ENSG00000157510	1.83583	3.87475	1.87013	3.37668	3.42581	AFAP1L1	5	149271871	149341802	+	4721	protein_coding	actin filament associated protein 1 like 1 [Source:HGNC Symbol;Acc:HGNC:26714]	-
ENSG00000261801	2.47699	4.7522	2.76577	4.02744	4.92468	LOXL1-AS1	15	73908071	73928248	-	4221	antisense	LOXL1 antisense RNA 1 [Source:HGNC Symbol;Acc:HGNC:44169]	-
ENSG00000198730	16.4164	10.8249	13.1556	11.3652	11.8001	CTR9	11	10750987	10801625	+	6026	protein_coding	CTR9 homolog, Paf1/RNA polymerase II complex component [Source:HGNC Symbol;Acc:HGNC:16850]	-
ENSG00000137200	15.8219	10.6428	12.8194	9.68104	11.2519	CMTR1	6	37433219	37482827	+	5274	protein_coding	cap methyltransferase 1 [Source:HGNC Symbol;Acc:HGNC:21077]	-
ENSG00000072415	4.47657	7.00632	3.36418	6.00344	7.12635	MPP5	14	67241109	67335819	+	8743	protein_coding	membrane palmitoylated protein 5 [Source:HGNC Symbol;Acc:HGNC:18669]	-
ENSG00000073350	0.754583	0.00240806	1.09374	0.0201729	0.0106706	LLGL2	17	75525080	75575208	+	7909	protein_coding	LLGL2, scribble cell polarity complex component [Source:HGNC Symbol;Acc:HGNC:6629]	-
ENSG00000125538	1.31014	0.0201057	6.45279	0.115847	0.041789	IL1B	2	112829751	112836903	-	3096	protein_coding	interleukin 1 beta [Source:HGNC Symbol;Acc:HGNC:5992]	-
ENSG00000179456	2.52015	5.21956	3.01517	4.13017	4.52795	ZBTB18	1	244048939	244057476	+	3906	protein_coding	zinc finger and BTB domain containing 18 [Source:HGNC Symbol;Acc:HGNC:13030]	ZBTB
ENSG00000122644	0.921735	2.50518	0.75065	2.94653	2.25322	ARL4A	7	12686856	12690934	+	3561	protein_coding	ADP ribosylation factor like GTPase 4A [Source:HGNC Symbol;Acc:HGNC:695]	-
ENSG00000128923	3.38678	5.75383	3.84995	4.56911	6.1275	MINDY2	15	58771192	58861900	+	9454	protein_coding	MINDY lysine 48 deubiquitinase 2 [Source:HGNC Symbol;Acc:HGNC:26954]	-
ENSG00000204406	0.927968	0.471961	1.33911	0.482169	0.60004	MBD5	2	148021011	148516971	+	24256	protein_coding	methyl-CpG binding domain protein 5 [Source:HGNC Symbol;Acc:HGNC:20444]	-
ENSG00000103353	17.9418	12.6848	15.0356	10.7702	13.1849	UBFD1	16	23557362	23574389	+	8619	protein_coding	ubiquitin family domain containing 1 [Source:HGNC Symbol;Acc:HGNC:30565]	-
ENSG00000143387	265.868	361.86	359.784	419.857	348.61	CTSK	1	150796208	150808323	-	1887	protein_coding	cathepsin K [Source:HGNC Symbol;Acc:HGNC:2536]	-
ENSG00000285106	0.100551	0.454629	0.128145	0.363684	0.446884	AC016831.6	7	130791264	131110161	-	11088	lincRNA	novel transcript	-
ENSG00000169245	2.83233	0	3.70863	0.0786555	0	CXCL10	4	76021117	76023497	-	1176	protein_coding	C-X-C motif chemokine ligand 10 [Source:HGNC Symbol;Acc:HGNC:10637]	-
ENSG00000132669	9.12291	12.878	11.49	12.6009	12.8099	RIN2	20	19757606	20002459	+	8273	protein_coding	Ras and Rab interactor 2 [Source:HGNC Symbol;Acc:HGNC:18750]	-
ENSG00000101955	88.0803	62.8015	94.7075	64.0748	67.7316	SRPX	X	38149336	38220924	-	1987	protein_coding	sushi repeat containing protein X-linked [Source:HGNC Symbol;Acc:HGNC:11309]	-
ENSG00000196549	49.2448	37.0454	57.1055	31.0621	39.5612	MME	3	155024124	155183729	+	9620	protein_coding	membrane metalloendopeptidase [Source:HGNC Symbol;Acc:HGNC:7154]	-
ENSG00000124357	10.0125	14.4702	12.907	16.253	12.8064	NAGK	2	71064344	71079805	+	8894	protein_coding	N-acetylglucosamine kinase [Source:HGNC Symbol;Acc:HGNC:17174]	-
ENSG00000154803	6.89615	10.1414	9.99417	8.18373	9.01045	FLCN	17	17212212	17237188	-	9786	protein_coding	folliculin [Source:HGNC Symbol;Acc:HGNC:27310]	-
ENSG00000054598	2.24422	4.41485	1.31108	3.16735	4.02512	FOXC1	6	1609972	1613897	+	3926	protein_coding	forkhead box C1 [Source:HGNC Symbol;Acc:HGNC:3800]	Fork
ENSG00000112304	5.80837	3.15131	4.78883	4.95267	3.09561	ACOT13	6	24667035	24705065	+	4394	protein_coding	acyl-CoA thioesterase 13 [Source:HGNC Symbol;Acc:HGNC:20999]	-
ENSG00000171227	1.75574	0.234791	1.21123	0.434496	0.381743	TMEM37	2	119429901	119438520	+	2292	protein_coding	transmembrane protein 37 [Source:HGNC Symbol;Acc:HGNC:18216]	-
ENSG00000148290	25.8766	15.3796	25.1444	22.6015	14.8346	SURF1	9	133351755	133356676	-	1761	protein_coding	SURF1, cytochrome c oxidase assembly factor [Source:HGNC Symbol;Acc:HGNC:11474]	-
ENSG00000175643	1.27853	3.09204	1.95605	2.24032	2.47354	RMI2	16	11249619	11381662	+	3632	protein_coding	RecQ mediated genome instability 2 [Source:HGNC Symbol;Acc:HGNC:28349]	-
ENSG00000185896	174.016	131.515	188.571	129.255	132.106	LAMP1	13	113297241	113323672	+	5739	protein_coding	lysosomal associated membrane protein 1 [Source:HGNC Symbol;Acc:HGNC:6499]	-
ENSG00000173757	7.35374	10.9389	7.34087	10.7312	10.2798	STAT5B	17	42199168	42276707	-	6447	protein_coding	signal transducer and activator of transcription 5B [Source:HGNC Symbol;Acc:HGNC:11367]	STAT
ENSG00000180340	42.459	58.8647	42.7963	52.8645	58.7545	FZD2	17	44557459	44559570	+	2112	protein_coding	frizzled class receptor 2 [Source:HGNC Symbol;Acc:HGNC:4040]	-
ENSG00000188766	1.41537	2.86421	2.35108	2.34807	3.00994	SPRED3	19	38388421	38399587	+	5864	protein_coding	sprouty related EVH1 domain containing 3 [Source:HGNC Symbol;Acc:HGNC:31041]	-
ENSG00000136518	7.02592	11.1907	5.94878	10.4055	10.0178	ACTL6A	3	179562880	179588408	+	3675	protein_coding	actin like 6A [Source:HGNC Symbol;Acc:HGNC:24124]	-
ENSG00000133935	35.0862	23.255	23.6623	20.8397	24.1286	ERG28	14	75649791	75661189	-	2633	protein_coding	ergosterol biosynthesis 28 homolog [Source:HGNC Symbol;Acc:HGNC:1187]	-
ENSG00000166002	1.30705	4.90724	0.789664	4.21709	3.60394	SMCO4	11	93478472	93543508	-	1223	protein_coding	single-pass membrane protein with coiled-coil domains 4 [Source:HGNC Symbol;Acc:HGNC:24810]	-
ENSG00000143322	4.72208	7.49784	4.49692	6.52464	7.89765	ABL2	1	179099327	179229684	-	13257	protein_coding	ABL proto-oncogene 2, non-receptor tyrosine kinase [Source:HGNC Symbol;Acc:HGNC:77]	-
ENSG00000047634	2.13657	4.3487	1.73739	2.90965	3.88663	SCML1	X	17737449	17754988	+	5497	protein_coding	Scm polycomb group protein like 1 [Source:HGNC Symbol;Acc:HGNC:10580]	-
ENSG00000188612	28.1992	40.0235	35.7483	47.6628	34.8723	SUMO2	17	75165586	75182983	-	3372	protein_coding	small ubiquitin-like modifier 2 [Source:HGNC Symbol;Acc:HGNC:11125]	-
ENSG00000267041	0.150446	0.640626	0.207893	0.396716	0.486728	ZNF850	19	36714383	36772825	-	7850	protein_coding	zinc finger protein 850 [Source:HGNC Symbol;Acc:HGNC:27994]	zf-C2H2
ENSG00000089127	1.16311	0.00438046	0.671073	0	0	OAS1	12	112906777	112933222	+	4947	protein_coding	2'-5'-oligoadenylate synthetase 1 [Source:HGNC Symbol;Acc:HGNC:8086]	-
ENSG00000139182	5.16999	2.95186	7.03907	3.85238	3.72285	CLSTN3	12	7129698	7158945	+	6902	protein_coding	calsyntenin 3 [Source:HGNC Symbol;Acc:HGNC:18371]	-
ENSG00000271303	6.89062	2.2769	2.44015	3.68549	3.42495	SRXN1	20	646615	653370	-	2698	protein_coding	sulfiredoxin 1 [Source:HGNC Symbol;Acc:HGNC:16132]	-
ENSG00000247077	6.443	10.1985	4.13158	9.60737	9.19682	PGAM5	12	132710819	132722734	+	3952	protein_coding	PGAM family member 5, mitochondrial serine/threonine protein phosphatase [Source:HGNC Symbol;Acc:HGNC:28763]	-
ENSG00000160193	4.36829	8.57278	2.43788	9.60856	9.52368	WDR4	21	42843094	42879568	-	2738	protein_coding	WD repeat domain 4 [Source:HGNC Symbol;Acc:HGNC:12756]	-
ENSG00000188342	8.99999	15.2212	7.16032	16.8251	14.1208	GTF2F2	13	45120515	45284909	+	3619	protein_coding	general transcription factor IIF subunit 2 [Source:HGNC Symbol;Acc:HGNC:4653]	-
ENSG00000130881	31.4892	21.5723	29.7184	23.1143	22.4454	LRP3	19	33177603	33208867	+	5095	protein_coding	LDL receptor related protein 3 [Source:HGNC Symbol;Acc:HGNC:6695]	-
ENSG00000173227	0.30161	0	0.811617	0.00192054	0.00207688	SYT12	11	67006778	67050863	+	10830	protein_coding	synaptotagmin 12 [Source:HGNC Symbol;Acc:HGNC:18381]	-
ENSG00000204941	3.67036	6.25647	5.69552	8.99053	7.53481	PSG5	19	43166256	43186536	-	4678	protein_coding	pregnancy specific beta-1-glycoprotein 5 [Source:HGNC Symbol;Acc:HGNC:9522]	-
ENSG00000197961	1.15471	2.37111	1.27268	2.40518	2.20521	ZNF121	19	9560353	9584533	-	7251	protein_coding	zinc finger protein 121 [Source:HGNC Symbol;Acc:HGNC:12904]	zf-C2H2
ENSG00000168610	21.1177	15.0829	23.213	13.8355	15.7078	STAT3	17	42313324	42388568	-	8812	protein_coding	signal transducer and activator of transcription 3 [Source:HGNC Symbol;Acc:HGNC:11364]	STAT
ENSG00000180370	16.0916	23.1171	13.5135	18.8171	22.6986	PAK2	3	196739857	196832647	+	6270	protein_coding	p21 (RAC1) activated kinase 2 [Source:HGNC Symbol;Acc:HGNC:8591]	-
ENSG00000126391	16.0575	23.0814	14.5408	19.5193	21.1935	FRMD8	11	65386599	65413525	+	4091	protein_coding	FERM domain containing 8 [Source:HGNC Symbol;Acc:HGNC:25462]	-
ENSG00000116128	3.4813	1.69586	5.03109	1.27577	1.75657	BCL9	1	147541412	147626216	+	6420	protein_coding	B cell CLL/lymphoma 9 [Source:HGNC Symbol;Acc:HGNC:1008]	-
ENSG00000284976	9.30405	16.9054	8.02436	20.0187	15.382	BX255925.3	9	137217452	137219361	+	1910	protein_coding	novel RING finger protein	-
ENSG00000079999	34.8045	22.4846	34.6715	29.5044	24.8019	KEAP1	19	10486120	10503741	-	3761	protein_coding	kelch like ECH associated protein 1 [Source:HGNC Symbol;Acc:HGNC:23177]	-
[truncated: 11,096 more rows]
