# Supplementary material for: Transcriptome Analysis of Human Dermal Cells Infected with Candida auris Identified Unique Pathogenesis/Defensive Mechanisms Particularly Ferroptosis
Source: Springer Nature journal article supplement (doi:10.1007/s11046-024-00868-9), 2024-07-11
Supplement: MOESM3 [file 11046_2024_868_MOESM3_ESM.xlsx]

## Sheet: Flu_treatedvsWT.down_KEGGenrich
KEGGID	Description	GeneRatio	BgRatio	pvalue	padj	geneID	geneName	keggID	Count
hsa04110	Cell cycle	72/1483	120/5700	2.18942e-15	6.63394e-13	ENSG00000117399/ENSG00000127564/ENSG00000166508/ENSG00000100297/ENSG00000094804/ENSG00000104738/ENSG00000145386/ENSG00000170312/ENSG00000101412/ENSG00000092969/ENSG00000112118/ENSG00000169679/ENSG00000166851/ENSG00000091651/ENSG00000093009/ENSG00000134057/ENSG00000157456/ENSG00000135476/ENSG00000112742/ENSG00000156970/ENSG00000123080/ENSG00000164109/ENSG00000073111/ENSG00000076003/ENSG00000166483…	CDC20/PKMYT1/MCM7/MCM5/CDC6/MCM4/CCNA2/CDK1/E2F1/TGFB2/MCM3/BUB1/PLK1/ORC6/CDC45/CCNB1/CCNB2/ESPL1/TTK/BUB1B/CDKN2C/MAD2L1/MCM2/MCM6/WEE1/CDC25A/CDK2/GADD45B/PTTG1/YWHAH/PCNA/ORC1/RBL1/CDK6/CCND1/CDC7/TFDP1/BUB3/SKP2/MYC/CHEK1/E2F2/DBF4/SMC1A/CCND3/RB1/CDC25C/RAD21/SMC3/CCNE2/CCNE1/PRKDC/MAD1L1/CCNH/E2F3/STAG1/YWHAE/ATR/CUL1/HDAC2/RBX1/YWHAZ/E2F4/CDC23/CHEK2/ANAPC7/CDK4/CDKN2D/YWHAB/ORC5/SMAD2/CD…	hsa:991/hsa:9088/hsa:4176/hsa:4174/hsa:990/hsa:4173/hsa:890/hsa:983/hsa:1869/hsa:7042/hsa:4172/hsa:699/hsa:5347/hsa:23594/hsa:8318/hsa:891/hsa:9133/hsa:9700/hsa:7272/hsa:701/hsa:1031/hsa:4085/hsa:4171/hsa:4175/hsa:7465/hsa:993/hsa:1017/hsa:4616/hsa:9232/hsa:7533/hsa:5111/hsa:4998/hsa:5933/hsa:1021/hsa:595/hsa:8317/hsa:7027/hsa:9184/hsa:6502/hsa:4609/hsa:1111/hsa:1870/hsa:10926/hsa:8243/hsa:896/hs…	72
hsa03030	DNA replication	30/1483	35/5700	1.80179e-13	2.72971e-11	ENSG00000166508/ENSG00000100297/ENSG00000104738/ENSG00000112118/ENSG00000168496/ENSG00000177084/ENSG00000133119/ENSG00000073111/ENSG00000105486/ENSG00000076003/ENSG00000163918/ENSG00000062822/ENSG00000049541/ENSG00000077514/ENSG00000132646/ENSG00000101868/ENSG00000146143/ENSG00000014138/ENSG00000117748/ENSG00000148229/ENSG00000100479/ENSG00000138346/ENSG00000111445/ENSG00000198056/ENSG00000106628…	MCM7/MCM5/MCM4/MCM3/FEN1/POLE/RFC3/MCM2/LIG1/MCM6/RFC4/POLD1/RFC2/POLD3/PCNA/POLA1/PRIM2/POLA2/RPA2/POLE3/POLE2/DNA2/RFC5/PRIM1/POLD2/RPA1/RPA3/RNASEH2A/RNASEH2C/POLE4	hsa:4176/hsa:4174/hsa:4173/hsa:4172/hsa:2237/hsa:5426/hsa:5983/hsa:4171/hsa:3978/hsa:4175/hsa:5984/hsa:5424/hsa:5982/hsa:10714/hsa:5111/hsa:5422/hsa:5558/hsa:23649/hsa:6118/hsa:54107/hsa:5427/hsa:1763/hsa:5985/hsa:5557/hsa:5425/hsa:6117/hsa:6119/hsa:10535/hsa:84153/hsa:56655	30
hsa03040	Spliceosome	64/1483	123/5700	4.49443e-10	4.53937e-08	ENSG00000170144/ENSG00000147274/ENSG00000183684/ENSG00000135486/ENSG00000112081/ENSG00000115875/ENSG00000126803/ENSG00000167088/ENSG00000136875/ENSG00000077312/ENSG00000131876/ENSG00000125835/ENSG00000143368/ENSG00000113649/ENSG00000104897/ENSG00000130332/ENSG00000106355/ENSG00000141543/ENSG00000153187/ENSG00000051596/ENSG00000063244/ENSG00000117360/ENSG00000134453/ENSG00000132792/ENSG00000136527…	HNRNPA3/RBMX/ALYREF/HNRNPA1/SRSF3/SRSF7/HSPA2/SNRPD1/PRPF4/SNRPA/SNRPA1/SNRPB/SF3B4/TCERG1/SF3A2/LSM7/LSM5/EIF4A3/HNRNPU/THOC3/U2AF2/PRPF3/RBM17/CTNNBL1/TRA2B/SRSF4/U2SURP/LSM6/SF3A3/HNRNPM/PUF60/SNU13/LSM4/DHX15/MAGOHB/SNRPF/PHF5A/RP9/TXNL4A/PPIL1/PRPF19/DDX46/SNRNP40/HNRNPK/WBP11/SRSF1/MAGOH/SNRPE/PQBP1/SNRPB2/ACIN1/SNRNP27/PCBP1/SNRPC/RBM25/LSM3/SART1/PPIH/SRSF10/SNRPD3/CCDC12/PRPF38B/SF3B3/US…	hsa:220988/hsa:27316/hsa:10189/hsa:3178/hsa:6428/hsa:6432/hsa:3306/hsa:6632/hsa:9128/hsa:6626/hsa:6627/hsa:6628/hsa:10262/hsa:10915/hsa:8175/hsa:51690/hsa:23658/hsa:9775/hsa:3192/hsa:84321/hsa:11338/hsa:9129/hsa:84991/hsa:56259/hsa:6434/hsa:6429/hsa:23350/hsa:11157/hsa:10946/hsa:4670/hsa:22827/hsa:4809/hsa:25804/hsa:1665/hsa:55110/hsa:6636/hsa:84844/hsa:6100/hsa:10907/hsa:51645/hsa:27339/hsa:9879…	64
hsa03460	Fanconi anemia pathway	34/1483	54/5700	1.06266e-08	8.04967e-07	ENSG00000136492/ENSG00000162607/ENSG00000187741/ENSG00000140525/ENSG00000221829/ENSG00000012048/ENSG00000139618/ENSG00000144554/ENSG00000197299/ENSG00000112039/ENSG00000154920/ENSG00000117748/ENSG00000181544/ENSG00000158169/ENSG00000172732/ENSG00000178966/ENSG00000185504/ENSG00000077152/ENSG00000187790/ENSG00000175643/ENSG00000177302/ENSG00000164053/ENSG00000169689/ENSG00000132383/ENSG00000076242…	BRIP1/USP1/FANCA/FANCI/FANCG/BRCA1/BRCA2/FANCD2/BLM/FANCE/EME1/RPA2/FANCB/FANCC/MUS81/RMI1/FAAP100/UBE2T/FANCM/RMI2/TOP3A/ATRIP/CENPX/RPA1/MLH1/RPA3/REV1/ERCC1/FAAP24/TELO2/FANCL/ATR/PALB2/SLX4	hsa:83990/hsa:7398/hsa:2175/hsa:55215/hsa:2189/hsa:672/hsa:675/hsa:2177/hsa:641/hsa:2178/hsa:146956/hsa:6118/hsa:2187/hsa:2176/hsa:80198/hsa:80010/hsa:80233/hsa:29089/hsa:57697/hsa:116028/hsa:7156/hsa:84126/hsa:201254/hsa:6117/hsa:4292/hsa:6119/hsa:51455/hsa:2067/hsa:91442/hsa:9894/hsa:55120/hsa:545/hsa:79728/hsa:84464	34
hsa03008	Ribosome biogenesis in eukaryotes	41/1483	72/5700	2.22028e-08	1.34549e-06	ENSG00000101361/ENSG00000132341/ENSG00000107937/ENSG00000070814/ENSG00000130826/ENSG00000134697/ENSG00000132661/ENSG00000105202/ENSG00000126524/ENSG00000055044/ENSG00000189306/ENSG00000112159/ENSG00000005189/ENSG00000172336/ENSG00000109534/ENSG00000242372/ENSG00000165271/ENSG00000178718/ENSG00000136718/ENSG00000104356/ENSG00000163938/ENSG00000145375/ENSG00000163811/ENSG00000108651/ENSG00000100138…	NOP56/RAN/GTPBP4/TCOF1/DKC1/GNL2/NXT1/FBL/SBDS/NOP58/RRP7A/MDN1/REXO5/POP7/GAR1/EIF6/NOL6/RPP25/IMP4/POP1/GNL3/SPATA5/WDR43/UTP6/SNU13/WDR36/TBL3/NMD3/EMG1/RPP30/RCL1/NHP2/RBM28/XPO1/UTP15/BMS1/RPP40/NOB1/RIOK2/REXO2/REXO1	hsa:10528/hsa:5901/hsa:23560/hsa:6949/hsa:1736/hsa:29889/hsa:29107/hsa:2091/hsa:51119/hsa:51602/hsa:27341/hsa:23195/hsa:81691/hsa:10248/hsa:54433/hsa:3692/hsa:65083/hsa:54913/hsa:92856/hsa:10940/hsa:26354/hsa:166378/hsa:23160/hsa:55813/hsa:4809/hsa:134430/hsa:10607/hsa:51068/hsa:10436/hsa:10556/hsa:10171/hsa:55651/hsa:55131/hsa:7514/hsa:84135/hsa:9790/hsa:10799/hsa:28987/hsa:55781/hsa:25996/hsa:5…	41
hsa03410	Base excision repair	23/1483	33/5700	1.7229e-07	8.70064e-06	ENSG00000168496/ENSG00000177084/ENSG00000105486/ENSG00000062822/ENSG00000077514/ENSG00000132646/ENSG00000109674/ENSG00000189403/ENSG00000148229/ENSG00000100479/ENSG00000129484/ENSG00000005156/ENSG00000106628/ENSG00000076248/ENSG00000073050/ENSG00000143799/ENSG00000041880/ENSG00000169188/ENSG00000132781/ENSG00000114026/ENSG00000139372/ENSG00000065057/ENSG00000115350	FEN1/POLE/LIG1/POLD1/POLD3/PCNA/NEIL3/HMGB1/POLE3/POLE2/PARP2/LIG3/POLD2/UNG/XRCC1/PARP1/PARP3/APEX2/MUTYH/OGG1/TDG/NTHL1/POLE4	hsa:2237/hsa:5426/hsa:3978/hsa:5424/hsa:10714/hsa:5111/hsa:55247/hsa:3146/hsa:54107/hsa:5427/hsa:10038/hsa:3980/hsa:5425/hsa:7374/hsa:7515/hsa:142/hsa:10039/hsa:27301/hsa:4595/hsa:4968/hsa:6996/hsa:4913/hsa:56655	23
hsa00240	Pyrimidine metabolism	47/1483	95/5700	6.72225e-07	2.90977e-05	ENSG00000171848/ENSG00000167900/ENSG00000171793/ENSG00000177084/ENSG00000143179/ENSG00000062822/ENSG00000176890/ENSG00000077514/ENSG00000167325/ENSG00000101868/ENSG00000156136/ENSG00000084774/ENSG00000146143/ENSG00000014138/ENSG00000168393/ENSG00000239672/ENSG00000148229/ENSG00000100479/ENSG00000179958/ENSG00000168495/ENSG00000198805/ENSG00000122643/ENSG00000183696/ENSG00000198056/ENSG00000103202…	RRM2/TK1/CTPS1/POLE/UCK2/POLD1/TYMS/POLD3/RRM1/POLA1/DCK/CAD/PRIM2/POLA2/DTYMK/NME1/POLE3/POLE2/DCTPP1/POLR3D/PNP/NT5C3A/UPP1/PRIM1/NME4/UCKL1/POLD2/CMPK1/POLR1E/NT5C/ENPP1/POLR3H/DHODH/POLR3K/DUT/POLR3G/POLR2D/PNPT1/POLR3C/CDA/POLR2J2/POLR2J3/UMPS/POLR1B/NME2/ENTPD6/POLE4	hsa:6241/hsa:7083/hsa:1503/hsa:5426/hsa:7371/hsa:5424/hsa:7298/hsa:10714/hsa:6240/hsa:5422/hsa:1633/hsa:790/hsa:5558/hsa:23649/hsa:1841/hsa:4830/hsa:54107/hsa:5427/hsa:79077/hsa:661/hsa:4860/hsa:51251/hsa:7378/hsa:5557/hsa:4833/hsa:54963/hsa:5425/hsa:51727/hsa:64425/hsa:30833/hsa:5167/hsa:171568/hsa:1723/hsa:51728/hsa:1854/hsa:10622/hsa:5433/hsa:87178/hsa:10623/hsa:978/hsa:246721/hsa:548644/hsa:7…	47
hsa03420	Nucleotide excision repair	26/1483	42/5700	9.53606e-07	3.61178e-05	ENSG00000177084/ENSG00000133119/ENSG00000105486/ENSG00000163918/ENSG00000062822/ENSG00000049541/ENSG00000077514/ENSG00000132646/ENSG00000117748/ENSG00000148229/ENSG00000100479/ENSG00000111445/ENSG00000119318/ENSG00000106628/ENSG00000132383/ENSG00000104884/ENSG00000106399/ENSG00000012061/ENSG00000134480/ENSG00000179262/ENSG00000139842/ENSG00000100387/ENSG00000183474/ENSG00000158290/ENSG00000020426…	POLE/RFC3/LIG1/RFC4/POLD1/RFC2/POLD3/PCNA/RPA2/POLE3/POLE2/RFC5/RAD23B/POLD2/RPA1/ERCC2/RPA3/ERCC1/CCNH/RAD23A/CUL4A/RBX1/GTF2H2C/CUL4B/MNAT1/POLE4	hsa:5426/hsa:5983/hsa:3978/hsa:5984/hsa:5424/hsa:5982/hsa:10714/hsa:5111/hsa:6118/hsa:54107/hsa:5427/hsa:5985/hsa:5887/hsa:5425/hsa:6117/hsa:2068/hsa:6119/hsa:2067/hsa:902/hsa:5886/hsa:8451/hsa:9978/hsa:730394/hsa:8450/hsa:4331/hsa:56655	26
hsa03013	RNA transport	67/1483	155/5700	1.85133e-06	6.23282e-05	ENSG00000013810/ENSG00000125450/ENSG00000100401/ENSG00000213024/ENSG00000183684/ENSG00000132341/ENSG00000187840/ENSG00000132661/ENSG00000085415/ENSG00000108424/ENSG00000093000/ENSG00000101104/ENSG00000102900/ENSG00000205937/ENSG00000139496/ENSG00000157020/ENSG00000058804/ENSG00000155561/ENSG00000124789/ENSG00000134001/ENSG00000188612/ENSG00000172336/ENSG00000179409/ENSG00000133226/ENSG00000120253…	TACC3/NUP85/RANGAP1/NUP62/ALYREF/RAN/EIF4EBP1/NXT1/SEH1L/KPNB1/NUP50/PABPC1L/NUP93/RNPS1/NUP58/SEC13/NDC1/NUP205/NUP153/EIF2S1/SUMO2/POP7/GEMIN4/SRRM1/NUP43/PNN/RPP25/NUP155/NUP188/EIF1AX/SUMO3/POP1/EIF4E/EIF4A3/EIF4G1/NUP107/THOC3/NUP54/NUP35/MAGOHB/EIF3J/EIF3D/EIF2B2/NUP98/THOC5/NMD3/ELAC2/TRNT1/EIF2S2/RPP30/NUP88/EIF3I/XPO5/MAGOH/ACIN1/GEMIN7/XPO1/PRMT5/EIF3B/UBE2I/DDX20/RPP40/NUP160/THOC6/EIF…	hsa:10460/hsa:79902/hsa:5905/hsa:23636/hsa:10189/hsa:5901/hsa:1978/hsa:29107/hsa:81929/hsa:3837/hsa:10762/hsa:80336/hsa:9688/hsa:10921/hsa:9818/hsa:6396/hsa:55706/hsa:23165/hsa:9972/hsa:1965/hsa:6613/hsa:10248/hsa:50628/hsa:10250/hsa:348995/hsa:5411/hsa:54913/hsa:9631/hsa:23511/hsa:1964/hsa:6612/hsa:10940/hsa:1977/hsa:9775/hsa:1981/hsa:57122/hsa:84321/hsa:53371/hsa:129401/hsa:55110/hsa:8669/hsa:8…	67
hsa03430	Mismatch repair	16/1483	22/5700	5.86047e-06	0.000177572	ENSG00000133119/ENSG00000174371/ENSG00000105486/ENSG00000163918/ENSG00000062822/ENSG00000049541/ENSG00000077514/ENSG00000132646/ENSG00000116062/ENSG00000117748/ENSG00000095002/ENSG00000111445/ENSG00000106628/ENSG00000132383/ENSG00000076242/ENSG00000106399	RFC3/EXO1/LIG1/RFC4/POLD1/RFC2/POLD3/PCNA/MSH6/RPA2/MSH2/RFC5/POLD2/RPA1/MLH1/RPA3	hsa:5983/hsa:9156/hsa:3978/hsa:5984/hsa:5424/hsa:5982/hsa:10714/hsa:5111/hsa:2956/hsa:6118/hsa:4436/hsa:5985/hsa:5425/hsa:6117/hsa:4292/hsa:6119	16
hsa03440	Homologous recombination	23/1483	40/5700	2.31269e-05	0.000637042	ENSG00000136492/ENSG00000138376/ENSG00000085999/ENSG00000012048/ENSG00000139618/ENSG00000062822/ENSG00000077514/ENSG00000197299/ENSG00000196584/ENSG00000154920/ENSG00000126215/ENSG00000163781/ENSG00000101773/ENSG00000117748/ENSG00000172732/ENSG00000185379/ENSG00000177302/ENSG00000087206/ENSG00000106628/ENSG00000132383/ENSG00000106399/ENSG00000020922/ENSG00000083093	BRIP1/BARD1/RAD54L/BRCA1/BRCA2/POLD1/POLD3/BLM/XRCC2/EME1/XRCC3/TOPBP1/RBBP8/RPA2/MUS81/RAD51D/TOP3A/UIMC1/POLD2/RPA1/RPA3/MRE11/PALB2	hsa:83990/hsa:580/hsa:8438/hsa:672/hsa:675/hsa:5424/hsa:10714/hsa:641/hsa:7516/hsa:146956/hsa:7517/hsa:11073/hsa:5932/hsa:6118/hsa:80198/hsa:5892/hsa:7156/hsa:51720/hsa:5425/hsa:6117/hsa:6119/hsa:4361/hsa:79728	23
hsa04218	Cellular senescence	58/1483	142/5700	6.7816e-05	0.00171235	ENSG00000145386/ENSG00000170312/ENSG00000106366/ENSG00000101412/ENSG00000092969/ENSG00000101057/ENSG00000134057/ENSG00000157456/ENSG00000143933/ENSG00000133818/ENSG00000164045/ENSG00000123374/ENSG00000099860/ENSG00000080839/ENSG00000105810/ENSG00000110092/ENSG00000034152/ENSG00000111206/ENSG00000134954/ENSG00000187840/ENSG00000171608/ENSG00000136997/ENSG00000149554/ENSG00000007968/ENSG00000112576…	CCNA2/CDK1/SERPINE1/E2F1/TGFB2/MYBL2/CCNB1/CCNB2/CALM2/RRAS2/CDC25A/CDK2/GADD45B/RBL1/CDK6/CCND1/MAP2K3/FOXM1/ETS1/EIF4EBP1/PIK3CD/MYC/CHEK1/E2F2/CCND3/LIN9/ITPR3/LIN54/RB1/CCNE2/RHEB/CCNE1/MAPKAPK2/RAD1/MAPK12/KRAS/HRAS/CALM3/MRE11/CALM1/NRAS/E2F3/PPP3R1/IGFBP3/ZFP36L1/SLC25A5/ATR/MAPK14/MAP2K1/E2F4/LIN52/RELA/CHEK2/RAD9B/CDK4/VDAC2/SMAD2/VDAC3	hsa:890/hsa:983/hsa:5054/hsa:1869/hsa:7042/hsa:4605/hsa:891/hsa:9133/hsa:805/hsa:22800/hsa:993/hsa:1017/hsa:4616/hsa:5933/hsa:1021/hsa:595/hsa:5606/hsa:2305/hsa:2113/hsa:1978/hsa:5293/hsa:4609/hsa:1111/hsa:1870/hsa:896/hsa:286826/hsa:3710/hsa:132660/hsa:5925/hsa:9134/hsa:6009/hsa:898/hsa:9261/hsa:5810/hsa:6300/hsa:3845/hsa:3265/hsa:808/hsa:4361/hsa:801/hsa:4893/hsa:1871/hsa:5534/hsa:3486/hsa:677/…	58
hsa04114	Oocyte meiosis	46/1483	110/5700	0.000196694	0.00431936	ENSG00000117399/ENSG00000127564/ENSG00000170312/ENSG00000169679/ENSG00000166851/ENSG00000134057/ENSG00000087586/ENSG00000157456/ENSG00000135476/ENSG00000143933/ENSG00000164109/ENSG00000112029/ENSG00000123374/ENSG00000164611/ENSG00000128245/ENSG00000129810/ENSG00000072501/ENSG00000096433/ENSG00000158402/ENSG00000108055/ENSG00000175305/ENSG00000156509/ENSG00000113575/ENSG00000145349/ENSG00000105173…	CDC20/PKMYT1/CDK1/BUB1/PLK1/CCNB1/AURKA/CCNB2/ESPL1/CALM2/MAD2L1/FBXO5/CDK2/PTTG1/YWHAH/SGO1/SMC1A/ITPR3/CDC25C/SMC3/CCNE2/FBXO43/PPP2CA/CAMK2D/CCNE1/IGF1R/MAPK12/CALM3/CALM1/RPS6KA6/PPP3R1/PPP2CB/YWHAE/CUL1/MAP2K1/STAG3/RBX1/YWHAZ/CPEB3/CPEB2/CDC23/SPDYE2/ANAPC7/YWHAB/PPP2R5B/CDC16	hsa:991/hsa:9088/hsa:983/hsa:699/hsa:5347/hsa:891/hsa:6790/hsa:9133/hsa:9700/hsa:805/hsa:4085/hsa:26271/hsa:1017/hsa:9232/hsa:7533/hsa:151648/hsa:8243/hsa:3710/hsa:995/hsa:9126/hsa:9134/hsa:286151/hsa:5515/hsa:817/hsa:898/hsa:3480/hsa:6300/hsa:808/hsa:801/hsa:27330/hsa:5534/hsa:5516/hsa:7531/hsa:8454/hsa:5604/hsa:10734/hsa:9978/hsa:7534/hsa:22849/hsa:132864/hsa:8697/hsa:441273/hsa:51434/hsa:7529/…	46
hsa05206	MicroRNAs in cancer	60/1483	153/5700	0.000199574	0.00431936	ENSG00000137807/ENSG00000140416/ENSG00000146670/ENSG00000101412/ENSG00000092969/ENSG00000139514/ENSG00000130816/ENSG00000041982/ENSG00000149948/ENSG00000137801/ENSG00000117632/ENSG00000092820/ENSG00000122707/ENSG00000012048/ENSG00000075618/ENSG00000068028/ENSG00000106462/ENSG00000164045/ENSG00000161638/ENSG00000105810/ENSG00000110092/ENSG00000171791/ENSG00000136997/ENSG00000007968/ENSG00000148516…	KIF23/TPM1/CDCA5/E2F1/TGFB2/SLC7A1/DNMT1/TNC/HMGA2/THBS1/STMN1/EZR/RECK/BRCA1/FSCN1/RASSF1/EZH2/CDC25A/ITGA5/CDK6/CCND1/BCL2/MYC/E2F2/ZEB1/CASP3/VIM/MDM4/CDC25C/CCNE2/RHOA/IRS2/CCNE1/KRAS/MAPK7/PRKCA/DNMT3B/MET/BAK1/ROCK1/HRAS/NOTCH1/CD44/NRAS/IGF2BP1/E2F3/IRS1/MIR221/HNRNPK/PAK4/PTGS2/BCL2L2/MMP16/MAP2K1/SPRY2/PDGFA/DICER1/UBE2I/TIMP3/MARCKS	hsa:9493/hsa:7168/hsa:113130/hsa:1869/hsa:7042/hsa:6541/hsa:1786/hsa:3371/hsa:8091/hsa:7057/hsa:3925/hsa:7430/hsa:8434/hsa:672/hsa:6624/hsa:11186/hsa:2146/hsa:993/hsa:3678/hsa:1021/hsa:595/hsa:596/hsa:4609/hsa:1870/hsa:6935/hsa:836/hsa:7431/hsa:4194/hsa:995/hsa:9134/hsa:387/hsa:8660/hsa:898/hsa:3845/hsa:5598/hsa:5578/hsa:1789/hsa:4233/hsa:578/hsa:6093/hsa:3265/hsa:4851/hsa:960/hsa:4893/hsa:10642/…	60
hsa05100	Bacterial invasion of epithelial cells	31/1483	67/5700	0.000257826	0.00520809	ENSG00000075624/ENSG00000184009/ENSG00000035403/ENSG00000105974/ENSG00000161638/ENSG00000162704/ENSG00000138758/ENSG00000163466/ENSG00000171608/ENSG00000115414/ENSG00000089159/ENSG00000071205/ENSG00000105971/ENSG00000241553/ENSG00000067560/ENSG00000175416/ENSG00000112290/ENSG00000198087/ENSG00000105976/ENSG00000136238/ENSG00000050820/ENSG00000106976/ENSG00000136950/ENSG00000110395/ENSG00000177105…	ACTB/ACTG1/VCL/CAV1/ITGA5/ARPC5/SEPT11/ARPC2/PIK3CD/FN1/PXN/ARHGAP10/CAV2/ARPC4/RHOA/CLTB/WASF1/CD2AP/MET/RAC1/BCAR1/DNM1/ARPC5L/CBL/RHOG/ILK/SEPT2/WASF2/SEPT8/CLTA/CTTN	hsa:60/hsa:71/hsa:7414/hsa:857/hsa:3678/hsa:10092/hsa:55752/hsa:10109/hsa:5293/hsa:2335/hsa:5829/hsa:79658/hsa:858/hsa:10093/hsa:387/hsa:1212/hsa:8936/hsa:23607/hsa:4233/hsa:5879/hsa:9564/hsa:1759/hsa:81873/hsa:867/hsa:391/hsa:3611/hsa:4735/hsa:10163/hsa:23176/hsa:1211/hsa:2017	31
hsa04810	Regulation of actin cytoskeleton	70/1483	190/5700	0.000539398	0.0102148	ENSG00000183856/ENSG00000138675/ENSG00000139734/ENSG00000101335/ENSG00000072110/ENSG00000075624/ENSG00000133818/ENSG00000138685/ENSG00000184009/ENSG00000092820/ENSG00000165410/ENSG00000130402/ENSG00000147065/ENSG00000035403/ENSG00000101608/ENSG00000108518/ENSG00000161638/ENSG00000100345/ENSG00000131504/ENSG00000162704/ENSG00000172757/ENSG00000163466/ENSG00000171608/ENSG00000113578/ENSG00000115414…	IQGAP3/FGF5/DIAPH3/MYL9/ACTN1/ACTB/RRAS2/FGF2/ACTG1/EZR/CFL2/ACTN4/MSN/VCL/MYL12A/PFN1/ITGA5/MYH9/DIAPH1/ARPC5/CFL1/ARPC2/PIK3CD/FGF1/FN1/PXN/CHRM2/ITGA3/VAV2/SCIN/ARPC4/PIP5K1A/ARHGEF1/RHOA/PAK2/WASF1/MYL12B/LPAR1/MYLK/KRAS/PAK1/PIP4K2A/RAC1/ITGAE/ROCK1/HRAS/PPP1R12A/BCAR1/PDGFD/NRAS/ROCK2/ITGA6/PDGFC/ITGA2/TMSB4X/ARPC5L/PAK4/CXCL12/WASF2/FGF7/MAP2K1/PDGFA/SSH2/ITGA10/FGFR1/IQGAP1/ITGAV/DIAPH2/E…	hsa:128239/hsa:2250/hsa:81624/hsa:10398/hsa:87/hsa:60/hsa:22800/hsa:2247/hsa:71/hsa:7430/hsa:1073/hsa:81/hsa:4478/hsa:7414/hsa:10627/hsa:5216/hsa:3678/hsa:4627/hsa:1729/hsa:10092/hsa:1072/hsa:10109/hsa:5293/hsa:2246/hsa:2335/hsa:5829/hsa:1129/hsa:3675/hsa:7410/hsa:85477/hsa:10093/hsa:8394/hsa:9138/hsa:387/hsa:5062/hsa:8936/hsa:103910/hsa:1902/hsa:4638/hsa:3845/hsa:5058/hsa:5305/hsa:5879/hsa:3682/…	70
hsa05166	Human T-cell leukemia virus 1 infection	74/1483	208/5700	0.00120519	0.0214807	ENSG00000117399/ENSG00000111186/ENSG00000101412/ENSG00000092969/ENSG00000101057/ENSG00000177084/ENSG00000175592/ENSG00000157456/ENSG00000133818/ENSG00000177606/ENSG00000174804/ENSG00000156970/ENSG00000123080/ENSG00000164109/ENSG00000062822/ENSG00000164611/ENSG00000077514/ENSG00000132646/ENSG00000110092/ENSG00000132341/ENSG00000099901/ENSG00000137076/ENSG00000134954/ENSG00000112658/ENSG00000154473…	CDC20/WNT5B/E2F1/TGFB2/MYBL2/POLE/FOSL1/CCNB2/RRAS2/JUN/FZD4/BUB1B/CDKN2C/MAD2L1/POLD1/PTTG1/POLD3/PCNA/CCND1/RAN/RANBP1/TLN1/ETS1/SRF/BUB3/PIK3CD/FZD6/TLN2/MAPK8/MYC/POLE3/POLE2/CHEK1/XBP1/E2F2/CCND3/RB1/STAT5B/FZD2/DVL1/TCF3/KRAS/BCL2L1/POLD2/HRAS/NRAS/E2F3/PPP3R1/SLC25A5/ATR/ATF4/NFYB/TSPO/TBP/PDGFA/XPO1/WNT2/CDC23/RELA/ELK4/CHEK2/ANAPC7/CDK4/VDAC2/WNT5A/RANBP3/FZD8/SMAD2/KAT2A/TNFRSF13C/VDAC3…	hsa:991/hsa:81029/hsa:1869/hsa:7042/hsa:4605/hsa:5426/hsa:8061/hsa:9133/hsa:22800/hsa:3725/hsa:8322/hsa:701/hsa:1031/hsa:4085/hsa:5424/hsa:9232/hsa:10714/hsa:5111/hsa:595/hsa:5901/hsa:5902/hsa:7094/hsa:2113/hsa:6722/hsa:9184/hsa:5293/hsa:8323/hsa:83660/hsa:5599/hsa:4609/hsa:54107/hsa:5427/hsa:1111/hsa:7494/hsa:1870/hsa:896/hsa:5925/hsa:6777/hsa:2535/hsa:1855/hsa:6929/hsa:3845/hsa:598/hsa:5425/hsa…	74
hsa04510	Focal adhesion	67/1483	187/5700	0.00164315	0.0276598	ENSG00000159840/ENSG00000101335/ENSG00000108821/ENSG00000072110/ENSG00000125753/ENSG00000075624/ENSG00000177606/ENSG00000041982/ENSG00000184009/ENSG00000137801/ENSG00000196924/ENSG00000130402/ENSG00000142173/ENSG00000035403/ENSG00000101608/ENSG00000142156/ENSG00000105974/ENSG00000161638/ENSG00000128591/ENSG00000187498/ENSG00000110092/ENSG00000186340/ENSG00000131504/ENSG00000164692/ENSG00000137076…	ZYX/MYL9/COL1A1/ACTN1/VASP/ACTB/JUN/TNC/ACTG1/THBS1/FLNA/ACTN4/COL6A2/VCL/MYL12A/COL6A1/CAV1/ITGA5/FLNC/COL4A1/CCND1/THBS2/DIAPH1/COL1A2/TLN1/PIK3CD/TLN2/MAPK8/BCL2/FN1/PXN/ITGA3/CCND3/VAV2/CAV2/COL4A2/RHOA/PAK2/MYL12B/IGF1R/VEGFC/MYLK/BIRC2/RAP1B/PAK1/PRKCA/MET/RAC1/ROCK1/HRAS/PPP1R12A/BCAR1/LAMC3/PDGFD/ROCK2/ITGA6/PDGFC/THBS3/ITGA2/PARVB/PAK4/ILK/MAP2K1/PDGFA/ITGA10/PARVA/ITGAV	hsa:7791/hsa:10398/hsa:1277/hsa:87/hsa:7408/hsa:60/hsa:3725/hsa:3371/hsa:71/hsa:7057/hsa:2316/hsa:81/hsa:1292/hsa:7414/hsa:10627/hsa:1291/hsa:857/hsa:3678/hsa:2318/hsa:1282/hsa:595/hsa:7058/hsa:1729/hsa:1278/hsa:7094/hsa:5293/hsa:83660/hsa:5599/hsa:596/hsa:2335/hsa:5829/hsa:3675/hsa:896/hsa:7410/hsa:858/hsa:1284/hsa:387/hsa:5062/hsa:103910/hsa:3480/hsa:7424/hsa:4638/hsa:329/hsa:5908/hsa:5058/hsa:…	67
hsa05205	Proteoglycans in cancer	65/1483	181/5700	0.00179317	0.0285963	ENSG00000111186/ENSG00000092969/ENSG00000075624/ENSG00000133818/ENSG00000174804/ENSG00000138685/ENSG00000184009/ENSG00000137801/ENSG00000092820/ENSG00000196924/ENSG00000147065/ENSG00000011465/ENSG00000105974/ENSG00000161638/ENSG00000128591/ENSG00000100644/ENSG00000011422/ENSG00000110092/ENSG00000171608/ENSG00000164930/ENSG00000136997/ENSG00000115414/ENSG00000089159/ENSG00000115884/ENSG00000160293…	WNT5B/TGFB2/ACTB/RRAS2/FZD4/FGF2/ACTG1/THBS1/EZR/FLNA/MSN/DCN/CAV1/ITGA5/FLNC/HIF1A/PLAUR/CCND1/PIK3CD/FZD6/MYC/FN1/PXN/SDC1/VAV2/HBEGF/CASP3/ITPR3/CAV2/ARHGEF1/RHOA/FZD2/CAMK2D/IGF1R/LUM/MAPK12/KRAS/PAK1/PRKCA/MET/RAC1/ROCK1/HSPG2/HRAS/PPP1R12A/TFAP4/CD44/NRAS/ROCK2/SDC4/ITGA2/CBL/MAPK14/MAP2K1/WNT2/TIMP3/PTCH1/FGFR1/IQGAP1/ITGAV/CTTN/WNT5A/TWIST1/FZD8/SMAD2	hsa:81029/hsa:7042/hsa:60/hsa:22800/hsa:8322/hsa:2247/hsa:71/hsa:7057/hsa:7430/hsa:2316/hsa:4478/hsa:1634/hsa:857/hsa:3678/hsa:2318/hsa:3091/hsa:5329/hsa:595/hsa:5293/hsa:8323/hsa:4609/hsa:2335/hsa:5829/hsa:6382/hsa:7410/hsa:1839/hsa:836/hsa:3710/hsa:858/hsa:9138/hsa:387/hsa:2535/hsa:817/hsa:3480/hsa:4060/hsa:6300/hsa:3845/hsa:5058/hsa:5578/hsa:4233/hsa:5879/hsa:6093/hsa:3339/hsa:3265/hsa:4659/hs…	65
hsa05222	Small cell lung cancer	35/1483	88/5700	0.00308969	0.0468088	ENSG00000101412/ENSG00000173207/ENSG00000123374/ENSG00000099860/ENSG00000082512/ENSG00000187498/ENSG00000105810/ENSG00000110092/ENSG00000171608/ENSG00000145604/ENSG00000171791/ENSG00000136997/ENSG00000115414/ENSG00000007968/ENSG00000005884/ENSG00000127191/ENSG00000164305/ENSG00000123975/ENSG00000139687/ENSG00000134871/ENSG00000175305/ENSG00000105173/ENSG00000172115/ENSG00000110330/ENSG00000171552…	E2F1/CKS1B/CDK2/GADD45B/TRAF5/COL4A1/CDK6/CCND1/PIK3CD/SKP2/BCL2/MYC/FN1/E2F2/ITGA3/TRAF2/CASP3/CKS2/RB1/COL4A2/CCNE2/CCNE1/CYCS/BIRC2/BCL2L1/BAK1/APAF1/LAMC3/ITGA6/E2F3/ITGA2/PTGS2/RELA/CDK4/ITGAV	hsa:1869/hsa:1163/hsa:1017/hsa:4616/hsa:7188/hsa:1282/hsa:1021/hsa:595/hsa:5293/hsa:6502/hsa:596/hsa:4609/hsa:2335/hsa:1870/hsa:3675/hsa:7186/hsa:836/hsa:1164/hsa:5925/hsa:1284/hsa:9134/hsa:898/hsa:54205/hsa:329/hsa:598/hsa:578/hsa:317/hsa:10319/hsa:3655/hsa:1871/hsa:3673/hsa:5743/hsa:5970/hsa:1019/hsa:3685	35

## Sheet: Flu_treatedvsWT.up_KEGGenrich_s
KEGGID	Description	GeneRatio	BgRatio	pvalue	padj	geneID	geneName	keggID	Count
hsa04142	Lysosome	66/1623	117/5700	1.56513e-10	4.83625e-08	ENSG00000078081/ENSG00000049860/ENSG00000105612/ENSG00000010404/ENSG00000138760/ENSG00000166340/ENSG00000033627/ENSG00000196743/ENSG00000104763/ENSG00000170266/ENSG00000005893/ENSG00000135677/ENSG00000197746/ENSG00000071553/ENSG00000141458/ENSG00000197081/ENSG00000109323/ENSG00000256043/ENSG00000054983/ENSG00000166311/ENSG00000104341/ENSG00000119655/ENSG00000119899/ENSG00000179163/ENSG00000181523…	LAMP3/HEXB/DNASE2/IDS/SCARB2/TPP1/ATP6V0A1/GM2A/ASAH1/GLB1/LAMP2/GNS/PSAP/ATP6AP1/NPC1/IGF2R/MANBA/CTSO/GALC/SMPD1/LAPTM4B/NPC2/SLC17A5/FUCA1/SGSH/AP3S2/LAMP1/CTSB/AP1G2/AP1M2/CTSL/ATP6V0D2/GLA/HGSNAT/PLA2G15/NAGPA/AP3M1/CD164/CTSZ/LGMN/ATP6V0D1/ACP5/ACP2/GNPTAB/SLC11A2/SUMF1/PPT1/CTSS/MCOLN1/ARSG/AP1G1/CLN5/GNPTG/CLTC/LAPTM5/GGA2/MFSD8/IDUA/CD63/ABCB9/NAGA/CTSD/GALNS/CTSH/LITAF/M6PR	hsa:27074/hsa:3074/hsa:1777/hsa:3423/hsa:950/hsa:1200/hsa:535/hsa:2760/hsa:427/hsa:2720/hsa:3920/hsa:2799/hsa:5660/hsa:537/hsa:4864/hsa:3482/hsa:4126/hsa:1519/hsa:2581/hsa:6609/hsa:55353/hsa:10577/hsa:26503/hsa:2517/hsa:6448/hsa:10239/hsa:3916/hsa:1508/hsa:8906/hsa:10053/hsa:1514/hsa:245972/hsa:2717/hsa:138050/hsa:23659/hsa:51172/hsa:26985/hsa:8763/hsa:1522/hsa:5641/hsa:9114/hsa:54/hsa:53/hsa:791…	66
hsa04146	Peroxisome	42/1623	76/5700	7.55573e-07	0.000116736	ENSG00000112096/ENSG00000121691/ENSG00000138413/ENSG00000168306/ENSG00000005469/ENSG00000101986/ENSG00000133835/ENSG00000117450/ENSG00000107537/ENSG00000120915/ENSG00000060971/ENSG00000104823/ENSG00000117305/ENSG00000123983/ENSG00000139197/ENSG00000116171/ENSG00000151726/ENSG00000140284/ENSG00000161533/ENSG00000162735/ENSG00000124587/ENSG00000018510/ENSG00000166821/ENSG00000101417/ENSG00000127980…	SOD2/CAT/IDH1/ACOX2/CROT/ABCD1/HSD17B4/PRDX1/PHYH/EPHX2/ACAA1/ECH1/HMGCL/ACSL3/PEX5/SCP2/ACSL1/SLC27A2/ACOX1/PEX19/PEX6/AGPS/PEX11A/PXMP4/PEX1/GSTK1/MPV17/HACL1/GNPAT/PEX11B/DHRS4/NUDT12/SOD1/ABCD2/DDO/ACOT8/MVK/PEX11G/MPV17L/MLYCD/PEX16/ABCD3	hsa:6648/hsa:847/hsa:3417/hsa:8309/hsa:54677/hsa:215/hsa:3295/hsa:5052/hsa:5264/hsa:2053/hsa:30/hsa:1891/hsa:3155/hsa:2181/hsa:5830/hsa:6342/hsa:2180/hsa:11001/hsa:51/hsa:5824/hsa:5190/hsa:8540/hsa:8800/hsa:11264/hsa:5189/hsa:373156/hsa:4358/hsa:26061/hsa:8443/hsa:8799/hsa:10901/hsa:83594/hsa:6647/hsa:225/hsa:8528/hsa:10005/hsa:4598/hsa:92960/hsa:255027/hsa:23417/hsa:9409/hsa:5825	42
hsa04216	Ferroptosis	24/1623	37/5700	4.27736e-06	0.000440568	ENSG00000130066/ENSG00000087086/ENSG00000171867/ENSG00000151012/ENSG00000266412/ENSG00000167996/ENSG00000001084/ENSG00000168003/ENSG00000138449/ENSG00000140941/ENSG00000023909/ENSG00000141504/ENSG00000111684/ENSG00000115107/ENSG00000123983/ENSG00000151726/ENSG00000141510/ENSG00000101460/ENSG00000138821/ENSG00000167468/ENSG00000110911/ENSG00000100292/ENSG00000057663/ENSG00000161905	SAT1/FTL/PRNP/SLC7A11/NCOA4/FTH1/GCLC/SLC3A2/SLC40A1/MAP1LC3B/GCLM/SAT2/LPCAT3/STEAP3/ACSL3/ACSL1/TP53/MAP1LC3A/SLC39A8/GPX4/SLC11A2/HMOX1/ATG5/ALOX15	hsa:6303/hsa:2512/hsa:5621/hsa:23657/hsa:8031/hsa:2495/hsa:2729/hsa:6520/hsa:30061/hsa:81631/hsa:2730/hsa:112483/hsa:10162/hsa:55240/hsa:2181/hsa:2180/hsa:7157/hsa:84557/hsa:64116/hsa:2879/hsa:4891/hsa:3162/hsa:9474/hsa:246	24
hsa05323	Rheumatoid arthritis	33/1623	61/5700	2.11642e-05	0.00163493	ENSG00000169429/ENSG00000163739/ENSG00000108691/ENSG00000112715/ENSG00000105329/ENSG00000033627/ENSG00000114573/ENSG00000090339/ENSG00000071553/ENSG00000163735/ENSG00000136869/ENSG00000184371/ENSG00000124875/ENSG00000125538/ENSG00000136244/ENSG00000196611/ENSG00000135047/ENSG00000147614/ENSG00000119699/ENSG00000154188/ENSG00000159720/ENSG00000102575/ENSG00000128524/ENSG00000115009/ENSG00000250565…	CXCL8/CXCL1/CCL2/VEGFA/TGFB1/ATP6V0A1/ATP6V1A/ICAM1/ATP6AP1/CXCL5/TLR4/CSF1/CXCL6/IL1B/IL6/MMP1/CTSL/ATP6V0D2/TGFB3/ANGPT1/ATP6V0D1/ACP5/ATP6V1F/CCL20/ATP6V1E2/TNFSF13B/ATP6V1G1/ATP6V0E1/ATP6V1E1/ATP6V1C1/FOS/TLR2/TNFSF13	hsa:3576/hsa:2919/hsa:6347/hsa:7422/hsa:7040/hsa:535/hsa:523/hsa:3383/hsa:537/hsa:6374/hsa:7099/hsa:1435/hsa:6372/hsa:3553/hsa:3569/hsa:4312/hsa:1514/hsa:245972/hsa:7043/hsa:284/hsa:9114/hsa:54/hsa:9296/hsa:6364/hsa:90423/hsa:10673/hsa:9550/hsa:8992/hsa:529/hsa:528/hsa:2353/hsa:7097/hsa:8741	33
hsa04657	IL-17 signaling pathway	38/1623	80/5700	0.000215823	0.0133379	ENSG00000169429/ENSG00000163739/ENSG00000108691/ENSG00000100906/ENSG00000118503/ENSG00000081041/ENSG00000124391/ENSG00000163702/ENSG00000163735/ENSG00000102871/ENSG00000163220/ENSG00000080824/ENSG00000124875/ENSG00000125538/ENSG00000169245/ENSG00000136244/ENSG00000148346/ENSG00000196611/ENSG00000172216/ENSG00000163734/ENSG00000143546/ENSG00000055208/ENSG00000143556/ENSG00000137745/ENSG00000183735…	CXCL8/CXCL1/CCL2/NFKBIA/TNFAIP3/CXCL2/IL17C/IL17RC/CXCL5/TRADD/S100A9/HSP90AA1/CXCL6/IL1B/CXCL10/IL6/LCN2/MMP1/CEBPB/CXCL3/S100A8/TAB2/S100A7/MMP13/TBK1/CCL7/CCL20/TRAF3IP2/MAPK13/HSP90B1/MAPK11/CASP8/FOS/TAB3/TRAF3/TRAF6/MUC5B/ANAPC5	hsa:3576/hsa:2919/hsa:6347/hsa:4792/hsa:7128/hsa:2920/hsa:27189/hsa:84818/hsa:6374/hsa:8717/hsa:6280/hsa:3320/hsa:6372/hsa:3553/hsa:3627/hsa:3569/hsa:3934/hsa:4312/hsa:1051/hsa:2921/hsa:6279/hsa:23118/hsa:6278/hsa:4322/hsa:29110/hsa:6354/hsa:6364/hsa:10758/hsa:5603/hsa:7184/hsa:5600/hsa:841/hsa:2353/hsa:257397/hsa:7187/hsa:7189/hsa:727897/hsa:51433	38
hsa04621	NOD-like receptor signaling pathway	58/1623	138/5700	0.00038304	0.0197266	ENSG00000169429/ENSG00000163739/ENSG00000108691/ENSG00000100906/ENSG00000111335/ENSG00000163565/ENSG00000162645/ENSG00000115415/ENSG00000185507/ENSG00000118503/ENSG00000081041/ENSG00000150995/ENSG00000111331/ENSG00000105835/ENSG00000170581/ENSG00000034713/ENSG00000162654/ENSG00000125826/ENSG00000136869/ENSG00000080824/ENSG00000023445/ENSG00000169604/ENSG00000172936/ENSG00000125538/ENSG00000089127…	CXCL8/CXCL1/CCL2/NFKBIA/OAS2/IFI16/GBP2/STAT1/IRF7/TNFAIP3/CXCL2/ITPR1/OAS3/NAMPT/STAT2/GABARAPL2/GBP4/RBCK1/TLR4/HSP90AA1/BIRC3/ANTXR1/MYD88/IL1B/OAS1/IL6/IFNAR1/CTSB/CXCL3/JAK1/CASP1/NLRP1/GBP3/TP53BP1/TAB2/MAVS/ITPR2/TBK1/XIAP/RNASEL/ATG12/RNF31/MFN2/IRF9/ATG5/ANTXR2/TANK/MAPK13/PYCARD/MAPK11/P2RX7/CASP8/TAB3/TRAF3/TAB1/TRAF6/TXN/CASP4	hsa:3576/hsa:2919/hsa:6347/hsa:4792/hsa:4939/hsa:3428/hsa:2634/hsa:6772/hsa:3665/hsa:7128/hsa:2920/hsa:3708/hsa:4940/hsa:10135/hsa:6773/hsa:11345/hsa:115361/hsa:10616/hsa:7099/hsa:3320/hsa:330/hsa:84168/hsa:4615/hsa:3553/hsa:4938/hsa:3569/hsa:3454/hsa:1508/hsa:2921/hsa:3716/hsa:834/hsa:22861/hsa:2635/hsa:7158/hsa:23118/hsa:57506/hsa:3709/hsa:29110/hsa:331/hsa:6041/hsa:9140/hsa:55072/hsa:9927/hsa:…	58
hsa01212	Fatty acid metabolism	24/1623	46/5700	0.000573458	0.0246545	ENSG00000099194/ENSG00000134824/ENSG00000188921/ENSG00000169710/ENSG00000145284/ENSG00000149485/ENSG00000074696/ENSG00000060971/ENSG00000157184/ENSG00000196177/ENSG00000123983/ENSG00000138029/ENSG00000084754/ENSG00000151726/ENSG00000169169/ENSG00000099797/ENSG00000122971/ENSG00000161533/ENSG00000170522/ENSG00000131238/ENSG00000167315/ENSG00000138796/ENSG00000110090/ENSG00000127884	SCD/FADS2/HACD4/FASN/SCD5/FADS1/HACD3/ACAA1/CPT2/ACADSB/ACSL3/HADHB/HADHA/ACSL1/CPT1C/TECR/ACADS/ACOX1/ELOVL6/PPT1/ACAA2/HADH/CPT1A/ECHS1	hsa:6319/hsa:9415/hsa:401494/hsa:2194/hsa:79966/hsa:3992/hsa:51495/hsa:30/hsa:1376/hsa:36/hsa:2181/hsa:3032/hsa:3030/hsa:2180/hsa:126129/hsa:9524/hsa:35/hsa:51/hsa:79071/hsa:5538/hsa:10449/hsa:3033/hsa:1374/hsa:1892	24
hsa04622	RIG-I-like receptor signaling pathway	27/1623	54/5700	0.000638303	0.0246545	ENSG00000169429/ENSG00000100906/ENSG00000187608/ENSG00000115267/ENSG00000121060/ENSG00000185507/ENSG00000102871/ENSG00000107201/ENSG00000169245/ENSG00000108771/ENSG00000088888/ENSG00000198933/ENSG00000183735/ENSG00000068308/ENSG00000145782/ENSG00000163512/ENSG00000149476/ENSG00000057663/ENSG00000136560/ENSG00000095015/ENSG00000156711/ENSG00000185386/ENSG00000064012/ENSG00000131323/ENSG00000175104…	CXCL8/NFKBIA/ISG15/IFIH1/TRIM25/IRF7/TRADD/DDX58/CXCL10/DHX58/MAVS/TBKBP1/TBK1/OTUD5/ATG12/AZI2/TKFC/ATG5/TANK/MAP3K1/MAPK13/MAPK11/CASP8/TRAF3/TRAF6/RNF125/CYLD	hsa:3576/hsa:4792/hsa:9636/hsa:64135/hsa:7706/hsa:3665/hsa:8717/hsa:23586/hsa:3627/hsa:79132/hsa:57506/hsa:9755/hsa:29110/hsa:55593/hsa:9140/hsa:64343/hsa:26007/hsa:9474/hsa:10010/hsa:4214/hsa:5603/hsa:5600/hsa:841/hsa:7187/hsa:7189/hsa:54941/hsa:1540	27
hsa00280	Valine, leucine and isoleucine degradation	23/1623	44/5700	0.000718581	0.0246713	ENSG00000072210/ENSG00000143149/ENSG00000106049/ENSG00000060971/ENSG00000137992/ENSG00000117305/ENSG00000175198/ENSG00000196177/ENSG00000128928/ENSG00000138029/ENSG00000084754/ENSG00000183044/ENSG00000198130/ENSG00000122971/ENSG00000148090/ENSG00000119711/ENSG00000083123/ENSG00000167315/ENSG00000138796/ENSG00000111275/ENSG00000078070/ENSG00000112972/ENSG00000127884	ALDH3A2/ALDH9A1/HIBADH/ACAA1/DBT/HMGCL/PCCA/ACADSB/IVD/HADHB/HADHA/ABAT/HIBCH/ACADS/AUH/ALDH6A1/BCKDHB/ACAA2/HADH/ALDH2/MCCC1/HMGCS1/ECHS1	hsa:224/hsa:223/hsa:11112/hsa:30/hsa:1629/hsa:3155/hsa:5095/hsa:36/hsa:3712/hsa:3032/hsa:3030/hsa:18/hsa:26275/hsa:35/hsa:549/hsa:4329/hsa:594/hsa:10449/hsa:3033/hsa:217/hsa:56922/hsa:3157/hsa:1892	23
hsa04140	Autophagy - animal	51/1623	122/5700	0.000978036	0.0272336	ENSG00000168209/ENSG00000177169/ENSG00000078804/ENSG00000171862/ENSG00000005893/ENSG00000150995/ENSG00000034713/ENSG00000083290/ENSG00000070540/ENSG00000276600/ENSG00000175224/ENSG00000165861/ENSG00000025039/ENSG00000136874/ENSG00000110046/ENSG00000108443/ENSG00000185896/ENSG00000023287/ENSG00000089289/ENSG00000164733/ENSG00000176171/ENSG00000135047/ENSG00000083750/ENSG00000145675/ENSG00000103197…	DDIT4/ULK1/TP53INP2/PTEN/LAMP2/ITPR1/GABARAPL2/ULK2/WIPI1/RAB7B/ATG13/ZFYVE1/RRAGD/STX17/ATG2A/RPS6KB1/LAMP1/RB1CC1/IGBP1/CTSB/BNIP3/CTSL/RRAGB/PIK3R1/TSC2/AMBRA1/BECN1/VMP1/ATG9A/MTOR/ATG14/VAMP8/ATG10/PIK3C3/ATG12/PDPK1/WIPI2/EIF2AK4/ATG5/MAP2K2/ATG9B/DEPTOR/STK11/UVRAG/RRAGA/AKT1S1/ATG4A/NRBF2/TRAF6/CTSD/PRKACB	hsa:54541/hsa:8408/hsa:58476/hsa:5728/hsa:3920/hsa:3708/hsa:11345/hsa:9706/hsa:55062/hsa:338382/hsa:9776/hsa:53349/hsa:58528/hsa:55014/hsa:23130/hsa:6198/hsa:3916/hsa:9821/hsa:3476/hsa:1508/hsa:664/hsa:1514/hsa:10325/hsa:5295/hsa:7249/hsa:55626/hsa:8678/hsa:81671/hsa:79065/hsa:2475/hsa:22863/hsa:8673/hsa:83734/hsa:5289/hsa:9140/hsa:5170/hsa:26100/hsa:440275/hsa:9474/hsa:5605/hsa:285973/hsa:64798/…	51
hsa00480	Glutathione metabolism	23/1623	45/5700	0.00107873	0.0272336	ENSG00000142657/ENSG00000138413/ENSG00000104687/ENSG00000048392/ENSG00000001084/ENSG00000211445/ENSG00000213366/ENSG00000168765/ENSG00000134202/ENSG00000170899/ENSG00000023909/ENSG00000134201/ENSG00000002549/ENSG00000131067/ENSG00000085871/ENSG00000160211/ENSG00000167468/ENSG00000100031/ENSG00000197448/ENSG00000133433/ENSG00000008394/ENSG00000178814/ENSG00000167741	PGD/IDH1/GSR/RRM2B/GCLC/GPX3/GSTM2/GSTM4/GSTM3/GSTA4/GCLM/GSTM5/LAP3/GGT7/MGST2/G6PD/GPX4/GGT1/GSTK1/GSTT2B/MGST1/OPLAH/GGT6	hsa:5226/hsa:3417/hsa:2936/hsa:50484/hsa:2729/hsa:2878/hsa:2946/hsa:2948/hsa:2947/hsa:2941/hsa:2730/hsa:2949/hsa:51056/hsa:2686/hsa:4258/hsa:2539/hsa:2879/hsa:2678/hsa:373156/hsa:653689/hsa:4257/hsa:26873/hsa:124975	23
hsa05204	Chemical carcinogenesis	21/1623	40/5700	0.0011297	0.0272336	ENSG00000143819/ENSG00000138061/ENSG00000151632/ENSG00000213366/ENSG00000168765/ENSG00000134202/ENSG00000170899/ENSG00000140465/ENSG00000184254/ENSG00000132746/ENSG00000006534/ENSG00000134201/ENSG00000085871/ENSG00000137944/ENSG00000197448/ENSG00000106258/ENSG00000133433/ENSG00000196502/ENSG00000008394/ENSG00000159228/ENSG00000117594	EPHX1/CYP1B1/AKR1C2/GSTM2/GSTM4/GSTM3/GSTA4/CYP1A1/ALDH1A3/ALDH3B2/ALDH3B1/GSTM5/MGST2/KYAT3/GSTK1/CYP3A5/GSTT2B/SULT1A1/MGST1/CBR1/HSD11B1	hsa:2052/hsa:1545/hsa:1646/hsa:2946/hsa:2948/hsa:2947/hsa:2941/hsa:1543/hsa:220/hsa:222/hsa:221/hsa:2949/hsa:4258/hsa:56267/hsa:373156/hsa:1577/hsa:653689/hsa:6817/hsa:4257/hsa:873/hsa:3290	21
hsa04141	Protein processing in endoplasmic reticulum	61/1623	152/5700	0.00114575	0.0272336	ENSG00000117643/ENSG00000197930/ENSG00000116661/ENSG00000109501/ENSG00000044574/ENSG00000111885/ENSG00000116044/ENSG00000058262/ENSG00000055332/ENSG00000071537/ENSG00000068912/ENSG00000080824/ENSG00000088298/ENSG00000075826/ENSG00000159461/ENSG00000135506/ENSG00000130939/ENSG00000149428/ENSG00000118705/ENSG00000140943/ENSG00000102580/ENSG00000169223/ENSG00000118217/ENSG00000164070/ENSG00000127022…	MAN1C1/ERO1A/FBXO2/WFS1/HSPA5/MAN1A1/NFE2L2/SEC61A1/EIF2AK2/SEL1L/ERLEC1/HSP90AA1/EDEM2/SEC31B/AMFR/OS9/UBE4B/HYOU1/RPN2/MBTPS1/DNAJC3/LMAN2/ATF6/HSPA4L/CANX/UBQLN2/DNAJA1/MAN1A2/VCP/TUSC3/DNAJB2/EIF2AK1/CRYAB/MAN1B1/SKP1/MBTPS2/SEC24C/PDIA4/GANAB/UBE2D1/SIL1/PRKN/ATXN3/BCAP31/EIF2AK4/ERP29/NPLOC4/HSP90B1/FBXO6/ERO1B/MARCH6/PDIA6/DDOST/PRKCSH/PDIA3/UBXN6/LMAN1/UBE2D4/EDEM1/CALR/RPN1	hsa:57134/hsa:30001/hsa:26232/hsa:7466/hsa:3309/hsa:4121/hsa:4780/hsa:29927/hsa:5610/hsa:6400/hsa:27248/hsa:3320/hsa:55741/hsa:25956/hsa:267/hsa:10956/hsa:10277/hsa:10525/hsa:6185/hsa:8720/hsa:5611/hsa:10960/hsa:22926/hsa:22824/hsa:821/hsa:29978/hsa:3301/hsa:10905/hsa:7415/hsa:7991/hsa:3300/hsa:27102/hsa:1410/hsa:11253/hsa:6500/hsa:51360/hsa:9632/hsa:9601/hsa:23193/hsa:7321/hsa:64374/hsa:5071/hsa…	61
hsa05134	Legionellosis	24/1623	48/5700	0.00126104	0.027833	ENSG00000169429/ENSG00000163739/ENSG00000100906/ENSG00000125730/ENSG00000081041/ENSG00000136869/ENSG00000172936/ENSG00000125538/ENSG00000136244/ENSG00000101210/ENSG00000176171/ENSG00000163734/ENSG00000099968/ENSG00000137752/ENSG00000170458/ENSG00000165280/ENSG00000156508/ENSG00000169896/ENSG00000013441/ENSG00000103490/ENSG00000077150/ENSG00000064012/ENSG00000137462/ENSG00000132906	CXCL8/CXCL1/NFKBIA/C3/CXCL2/TLR4/MYD88/IL1B/IL6/EEF1A2/BNIP3/CXCL3/BCL2L13/CASP1/CD14/VCP/EEF1A1/ITGAM/CLK1/PYCARD/NFKB2/CASP8/TLR2/CASP9	hsa:3576/hsa:2919/hsa:4792/hsa:718/hsa:2920/hsa:7099/hsa:4615/hsa:3553/hsa:3569/hsa:1917/hsa:664/hsa:2921/hsa:23786/hsa:834/hsa:929/hsa:7415/hsa:1915/hsa:3684/hsa:1195/hsa:29108/hsa:4791/hsa:841/hsa:7097/hsa:842	24
hsa00980	Metabolism of xenobiotics by cytochrome P450	20/1623	38/5700	0.00141747	0.0292	ENSG00000187134/ENSG00000143819/ENSG00000138061/ENSG00000213366/ENSG00000168765/ENSG00000134202/ENSG00000170899/ENSG00000140465/ENSG00000184254/ENSG00000132746/ENSG00000006534/ENSG00000134201/ENSG00000085871/ENSG00000053371/ENSG00000197448/ENSG00000106258/ENSG00000133433/ENSG00000008394/ENSG00000159228/ENSG00000117594	AKR1C1/EPHX1/CYP1B1/GSTM2/GSTM4/GSTM3/GSTA4/CYP1A1/ALDH1A3/ALDH3B2/ALDH3B1/GSTM5/MGST2/AKR7A2/GSTK1/CYP3A5/GSTT2B/MGST1/CBR1/HSD11B1	hsa:1645/hsa:2052/hsa:1545/hsa:2946/hsa:2948/hsa:2947/hsa:2941/hsa:1543/hsa:220/hsa:222/hsa:221/hsa:2949/hsa:4258/hsa:8574/hsa:373156/hsa:1577/hsa:653689/hsa:4257/hsa:873/hsa:3290	20
hsa00051	Fructose and mannose metabolism	17/1623	31/5700	0.00178495	0.0344718	ENSG00000085662/ENSG00000109107/ENSG00000198074/ENSG00000152556/ENSG00000159399/ENSG00000165140/ENSG00000123836/ENSG00000178802/ENSG00000149476/ENSG00000156510/ENSG00000078237/ENSG00000254685/ENSG00000114268/ENSG00000112699/ENSG00000132199/ENSG00000170525/ENSG00000141959	AKR1B1/ALDOC/AKR1B10/PFKM/HK2/FBP1/PFKFB2/MPI/TKFC/HKDC1/TIGAR/FPGT/PFKFB4/GMDS/ENOSF1/PFKFB3/PFKL	hsa:231/hsa:230/hsa:57016/hsa:5213/hsa:3099/hsa:2203/hsa:5208/hsa:4351/hsa:26007/hsa:80201/hsa:57103/hsa:8790/hsa:5210/hsa:2762/hsa:55556/hsa:5209/hsa:5211	17
hsa04137	Mitophagy - animal	29/1623	63/5700	0.00215823	0.0385403	ENSG00000161011/ENSG00000177169/ENSG00000188554/ENSG00000187098/ENSG00000034713/ENSG00000276600/ENSG00000104765/ENSG00000176171/ENSG00000099968/ENSG00000106052/ENSG00000110497/ENSG00000126581/ENSG00000198925/ENSG00000135093/ENSG00000118689/ENSG00000123240/ENSG00000141510/ENSG00000183735/ENSG00000136436/ENSG00000138592/ENSG00000104946/ENSG00000185345/ENSG00000116688/ENSG00000126858/ENSG00000057663…	SQSTM1/ULK1/NBR1/MITF/GABARAPL2/RAB7B/BNIP3L/BNIP3/BCL2L13/TAX1BP1/AMBRA1/BECN1/ATG9A/USP30/FOXO3/OPTN/TP53/TBK1/CALCOCO2/USP8/TBC1D17/PRKN/MFN2/RHOT1/ATG5/ATG9B/CSNK2A2/SRC/UBB	hsa:8878/hsa:8408/hsa:4077/hsa:4286/hsa:11345/hsa:338382/hsa:665/hsa:664/hsa:23786/hsa:8887/hsa:55626/hsa:8678/hsa:79065/hsa:84749/hsa:2309/hsa:10133/hsa:7157/hsa:29110/hsa:10241/hsa:9101/hsa:79735/hsa:5071/hsa:9927/hsa:55288/hsa:9474/hsa:285973/hsa:1459/hsa:6714/hsa:7314	29
hsa05162	Measles	40/1623	94/5700	0.00224507	0.0385403	ENSG00000157601/ENSG00000100906/ENSG00000115267/ENSG00000111335/ENSG00000118971/ENSG00000120889/ENSG00000115415/ENSG00000160710/ENSG00000185507/ENSG00000118503/ENSG00000111331/ENSG00000055332/ENSG00000105327/ENSG00000170581/ENSG00000136869/ENSG00000107201/ENSG00000172936/ENSG00000125538/ENSG00000089127/ENSG00000168610/ENSG00000136244/ENSG00000142166/ENSG00000027697/ENSG00000162434/ENSG00000145675…	MX1/NFKBIA/IFIH1/OAS2/CCND2/TNFRSF10B/STAT1/ADAR/IRF7/TNFAIP3/OAS3/EIF2AK2/BBC3/STAT2/TLR4/DDX58/MYD88/IL1B/OAS1/STAT3/IL6/IFNAR1/IFNGR1/JAK1/PIK3R1/TAB2/MAVS/JAK3/EIF2AK1/TP53/TBK1/CD46/TNFSF10/IRF9/EIF2AK4/CSNK2A2/TLR2/EIF3H/TRAF6/STAT5A	hsa:4599/hsa:4792/hsa:64135/hsa:4939/hsa:894/hsa:8795/hsa:6772/hsa:103/hsa:3665/hsa:7128/hsa:4940/hsa:5610/hsa:27113/hsa:6773/hsa:7099/hsa:23586/hsa:4615/hsa:3553/hsa:4938/hsa:6774/hsa:3569/hsa:3454/hsa:3459/hsa:3716/hsa:5295/hsa:23118/hsa:57506/hsa:3718/hsa:27102/hsa:7157/hsa:29110/hsa:4179/hsa:8743/hsa:10379/hsa:440275/hsa:1459/hsa:7097/hsa:8667/hsa:7189/hsa:6776	40
hsa04620	Toll-like receptor signaling pathway	33/1623	75/5700	0.00277633	0.045152	ENSG00000169429/ENSG00000100906/ENSG00000118785/ENSG00000115415/ENSG00000185507/ENSG00000136869/ENSG00000172936/ENSG00000125538/ENSG00000169245/ENSG00000136244/ENSG00000142166/ENSG00000145675/ENSG00000154589/ENSG00000107968/ENSG00000170458/ENSG00000108984/ENSG00000055208/ENSG00000169248/ENSG00000183735/ENSG00000126934/ENSG00000156711/ENSG00000185386/ENSG00000064012/ENSG00000170345/ENSG00000137462…	CXCL8/NFKBIA/SPP1/STAT1/IRF7/TLR4/MYD88/IL1B/CXCL10/IL6/IFNAR1/PIK3R1/LY96/MAP3K8/CD14/MAP2K6/TAB2/CXCL11/TBK1/MAP2K2/MAPK13/MAPK11/CASP8/FOS/TLR2/TLR6/MAP2K4/TRAF3/TAB1/IRF5/CD40/TRAF6/TOLLIP	hsa:3576/hsa:4792/hsa:6696/hsa:6772/hsa:3665/hsa:7099/hsa:4615/hsa:3553/hsa:3627/hsa:3569/hsa:3454/hsa:5295/hsa:23643/hsa:1326/hsa:929/hsa:5608/hsa:23118/hsa:6373/hsa:29110/hsa:5605/hsa:5603/hsa:5600/hsa:841/hsa:2353/hsa:7097/hsa:10333/hsa:6416/hsa:7187/hsa:10454/hsa:3663/hsa:958/hsa:7189/hsa:54472	33
hsa05160	Hepatitis C	44/1623	107/5700	0.00309998	0.046879	ENSG00000169429/ENSG00000185745/ENSG00000100906/ENSG00000111335/ENSG00000115415/ENSG00000124762/ENSG00000125347/ENSG00000185507/ENSG00000111331/ENSG00000055332/ENSG00000170581/ENSG00000073060/ENSG00000102871/ENSG00000107201/ENSG00000181885/ENSG00000253958/ENSG00000089127/ENSG00000168610/ENSG00000142166/ENSG00000067182/ENSG00000162434/ENSG00000145675/ENSG00000189143/ENSG00000074211/ENSG00000130164…	CXCL8/IFIT1/NFKBIA/OAS2/STAT1/CDKN1A/IRF1/IRF7/OAS3/EIF2AK2/STAT2/SCARB1/TRADD/DDX58/CLDN7/CLDN23/OAS1/STAT3/IFNAR1/TNFRSF1A/JAK1/PIK3R1/CLDN4/PPP2R2C/LDLR/MAVS/EIF2AK1/TP53/TBK1/RNASEL/SOS2/EIF3E/PDPK1/IRF9/EIF2AK4/MAPK13/MAPK11/PPP2R1A/CLDN3/NR1H3/PIAS1/TRAF3/TRAF6/EGF	hsa:3576/hsa:3434/hsa:4792/hsa:4939/hsa:6772/hsa:1026/hsa:3659/hsa:3665/hsa:4940/hsa:5610/hsa:6773/hsa:949/hsa:8717/hsa:23586/hsa:1366/hsa:137075/hsa:4938/hsa:6774/hsa:3454/hsa:7132/hsa:3716/hsa:5295/hsa:1364/hsa:5522/hsa:3949/hsa:57506/hsa:27102/hsa:7157/hsa:29110/hsa:6041/hsa:6655/hsa:3646/hsa:5170/hsa:10379/hsa:440275/hsa:5603/hsa:5600/hsa:5518/hsa:1365/hsa:10062/hsa:8554/hsa:7187/hsa:7189/hsa…	44
hsa00561	Glycerolipid metabolism	23/1623	48/5700	0.00321434	0.046879	ENSG00000085662/ENSG00000072210/ENSG00000143149/ENSG00000198074/ENSG00000134324/ENSG00000132793/ENSG00000102393/ENSG00000101577/ENSG00000145214/ENSG00000067113/ENSG00000177666/ENSG00000101670/ENSG00000062282/ENSG00000141934/ENSG00000119927/ENSG00000204310/ENSG00000185000/ENSG00000158669/ENSG00000149476/ENSG00000169692/ENSG00000160216/ENSG00000111275/ENSG00000166035	AKR1B1/ALDH3A2/ALDH9A1/AKR1B10/LPIN1/LPIN3/GLA/LPIN2/DGKQ/PLPP1/PNPLA2/LIPG/DGAT2/PLPP2/GPAM/AGPAT1/DGAT1/GPAT4/TKFC/AGPAT2/AGPAT3/ALDH2/LIPC	hsa:231/hsa:224/hsa:223/hsa:57016/hsa:23175/hsa:64900/hsa:2717/hsa:9663/hsa:1609/hsa:8611/hsa:57104/hsa:9388/hsa:84649/hsa:8612/hsa:57678/hsa:10554/hsa:8694/hsa:137964/hsa:26007/hsa:10555/hsa:56894/hsa:217/hsa:3990	23
hsa05164	Influenza A	50/1623	125/5700	0.00333766	0.046879	ENSG00000169429/ENSG00000157601/ENSG00000108691/ENSG00000100906/ENSG00000115267/ENSG00000111335/ENSG00000121060/ENSG00000120889/ENSG00000115415/ENSG00000160710/ENSG00000090339/ENSG00000185507/ENSG00000111331/ENSG00000055332/ENSG00000170581/ENSG00000136869/ENSG00000107201/ENSG00000172936/ENSG00000125538/ENSG00000169245/ENSG00000089127/ENSG00000136244/ENSG00000142166/ENSG00000134321/ENSG00000027697…	CXCL8/MX1/CCL2/NFKBIA/IFIH1/OAS2/TRIM25/TNFRSF10B/STAT1/ADAR/ICAM1/IRF7/OAS3/EIF2AK2/STAT2/TLR4/DDX58/MYD88/IL1B/CXCL10/OAS1/IL6/IFNAR1/RSAD2/IFNGR1/TNFRSF1A/DNAJC3/JAK1/PIK3R1/CASP1/PML/MAP2K6/MAVS/EIF2AK1/TMPRSS2/TBK1/RNASEL/TMPRSS13/TNFSF10/IRF9/EIF2AK4/MAP2K2/MAPK13/PYCARD/MAPK11/FDPS/EP300/CASP9/MAP2K4/KPNA1	hsa:3576/hsa:4599/hsa:6347/hsa:4792/hsa:64135/hsa:4939/hsa:7706/hsa:8795/hsa:6772/hsa:103/hsa:3383/hsa:3665/hsa:4940/hsa:5610/hsa:6773/hsa:7099/hsa:23586/hsa:4615/hsa:3553/hsa:3627/hsa:4938/hsa:3569/hsa:3454/hsa:91543/hsa:3459/hsa:7132/hsa:5611/hsa:3716/hsa:5295/hsa:834/hsa:5371/hsa:5608/hsa:57506/hsa:27102/hsa:7113/hsa:29110/hsa:6041/hsa:84000/hsa:8743/hsa:10379/hsa:440275/hsa:5605/hsa:5603/hsa:…	50

## Sheet: Cell_treated.down_KEGGenric
KEGGID	Description	GeneRatio	BgRatio	pvalue	padj	geneID	geneName	keggID	Count
hsa03010	Ribosome	38/369	127/5472	7.24174e-16	1.82492e-13	ENSG00000180992/ENSG00000131469/ENSG00000108826/ENSG00000118181/ENSG00000112110/ENSG00000115268/ENSG00000262814/ENSG00000149806/ENSG00000143314/ENSG00000114391/ENSG00000177600/ENSG00000166441/ENSG00000197958/ENSG00000243147/ENSG00000174547/ENSG00000122406/ENSG00000197345/ENSG00000197728/ENSG00000188846/ENSG00000144713/ENSG00000243927/ENSG00000106591/ENSG00000165502/ENSG00000086504/ENSG00000147604…	MRPL14/RPL27/MRPL27/RPS25/MRPL18/RPS15/MRPL12/FAU/MRPL24/RPL24/RPLP2/RPL27A/RPL12/MRPL33/MRPL11/RPL5/MRPL21/RPS26/RPL14/RPL32/MRPS6/MRPL32/RPL36AL/MRPL28/RPL7/RPS13/MRPL22/MRPL34/RPL8/RPL13A/RPL28/RPL35A/RPL19/RPS15A/RPS19/MRPS18C/RPS12/MRPL15	hsa:64928/hsa:6155/hsa:51264/hsa:6230/hsa:29074/hsa:6209/hsa:6182/hsa:2197/hsa:79590/hsa:6152/hsa:6181/hsa:6157/hsa:6136/hsa:9553/hsa:65003/hsa:6125/hsa:219927/hsa:6231/hsa:9045/hsa:6161/hsa:64968/hsa:64983/hsa:6166/hsa:10573/hsa:6129/hsa:6207/hsa:29093/hsa:64981/hsa:6132/hsa:23521/hsa:6158/hsa:6165/hsa:6143/hsa:6210/hsa:6223/hsa:51023/hsa:6206/hsa:29088	38
hsa00190	Oxidative phosphorylation	29/369	123/5472	1.33792e-09	1.68577e-07	ENSG00000164919/ENSG00000126267/ENSG00000178741/ENSG00000090266/ENSG00000183648/ENSG00000173660/ENSG00000184983/ENSG00000128524/ENSG00000125356/ENSG00000176340/ENSG00000047249/ENSG00000131174/ENSG00000004779/ENSG00000154518/ENSG00000099795/ENSG00000117410/ENSG00000109390/ENSG00000184752/ENSG00000140990/ENSG00000241837/ENSG00000154723/ENSG00000138495/ENSG00000135940/ENSG00000119013/ENSG00000167792…	COX6C/COX6B1/COX5A/NDUFB2/NDUFB1/UQCRH/NDUFA6/ATP6V1F/NDUFA1/COX8A/ATP6V1H/COX7B/NDUFAB1/ATP5MC3/NDUFB7/ATP6V0B/NDUFC1/NDUFA12/NDUFB10/ATP5PO/ATP5PF/COX17/COX5B/NDUFB3/NDUFV1/NDUFS5/ATP6V0D1/NDUFS3/ATP6V1D	hsa:1345/hsa:1340/hsa:9377/hsa:4708/hsa:4707/hsa:7388/hsa:4700/hsa:9296/hsa:4694/hsa:1351/hsa:51606/hsa:1349/hsa:4706/hsa:518/hsa:4713/hsa:533/hsa:4717/hsa:55967/hsa:4716/hsa:539/hsa:522/hsa:10063/hsa:1329/hsa:4709/hsa:4723/hsa:4725/hsa:9114/hsa:4722/hsa:51382	29
hsa05016	Huntington disease	35/369	178/5472	4.69182e-09	3.94113e-07	ENSG00000164919/ENSG00000122705/ENSG00000126267/ENSG00000178741/ENSG00000090266/ENSG00000183648/ENSG00000173660/ENSG00000184983/ENSG00000125356/ENSG00000176340/ENSG00000131174/ENSG00000004779/ENSG00000154518/ENSG00000099795/ENSG00000141510/ENSG00000109390/ENSG00000184752/ENSG00000105327/ENSG00000140990/ENSG00000241837/ENSG00000175416/ENSG00000005075/ENSG00000154723/ENSG00000100142/ENSG00000135940…	COX6C/CLTA/COX6B1/COX5A/NDUFB2/NDUFB1/UQCRH/NDUFA6/NDUFA1/COX8A/COX7B/NDUFAB1/ATP5MC3/NDUFB7/TP53/NDUFC1/NDUFA12/BBC3/NDUFB10/ATP5PO/CLTB/POLR2J/ATP5PF/POLR2F/COX5B/SLC25A5/NDUFB3/SIN3A/NDUFV1/NDUFS5/SOD1/GPX1/HDAC1/NDUFS3/POLR2L	hsa:1345/hsa:1211/hsa:1340/hsa:9377/hsa:4708/hsa:4707/hsa:7388/hsa:4700/hsa:4694/hsa:1351/hsa:1349/hsa:4706/hsa:518/hsa:4713/hsa:7157/hsa:4717/hsa:55967/hsa:27113/hsa:4716/hsa:539/hsa:1212/hsa:5439/hsa:522/hsa:5435/hsa:1329/hsa:292/hsa:4709/hsa:25942/hsa:4723/hsa:4725/hsa:6647/hsa:2876/hsa:3065/hsa:4722/hsa:5441	35
hsa04110	Cell cycle	27/369	119/5472	1.23844e-08	7.8022e-07	ENSG00000099860/ENSG00000124762/ENSG00000166508/ENSG00000104738/ENSG00000112118/ENSG00000117399/ENSG00000132646/ENSG00000101412/ENSG00000100387/ENSG00000073111/ENSG00000164045/ENSG00000100297/ENSG00000091651/ENSG00000076003/ENSG00000127564/ENSG00000135679/ENSG00000141510/ENSG00000170312/ENSG00000101224/ENSG00000094804/ENSG00000166851/ENSG00000128245/ENSG00000135446/ENSG00000116478/ENSG00000196510…	GADD45B/CDKN1A/MCM7/MCM4/MCM3/CDC20/PCNA/E2F1/RBX1/MCM2/CDC25A/MCM5/ORC6/MCM6/PKMYT1/MDM2/TP53/CDK1/CDC25B/CDC6/PLK1/YWHAH/CDK4/HDAC1/ANAPC7/ESPL1/SKP2	hsa:4616/hsa:1026/hsa:4176/hsa:4173/hsa:4172/hsa:991/hsa:5111/hsa:1869/hsa:9978/hsa:4171/hsa:993/hsa:4174/hsa:23594/hsa:4175/hsa:9088/hsa:4193/hsa:7157/hsa:983/hsa:994/hsa:990/hsa:5347/hsa:7533/hsa:1019/hsa:3065/hsa:51434/hsa:9700/hsa:6502	27
hsa03030	DNA replication	14/369	35/5472	1.98707e-08	1.00148e-06	ENSG00000166508/ENSG00000104738/ENSG00000112118/ENSG00000132646/ENSG00000117748/ENSG00000073111/ENSG00000177084/ENSG00000100297/ENSG00000168496/ENSG00000076003/ENSG00000138346/ENSG00000105486/ENSG00000049541/ENSG00000062822	MCM7/MCM4/MCM3/PCNA/RPA2/MCM2/POLE/MCM5/FEN1/MCM6/DNA2/LIG1/RFC2/POLD1	hsa:4176/hsa:4173/hsa:4172/hsa:5111/hsa:6118/hsa:4171/hsa:5426/hsa:4174/hsa:2237/hsa:4175/hsa:1763/hsa:3978/hsa:5982/hsa:5424	14
hsa05012	Parkinson disease	27/369	130/5472	9.03097e-08	3.79301e-06	ENSG00000164919/ENSG00000170315/ENSG00000126267/ENSG00000178741/ENSG00000090266/ENSG00000183648/ENSG00000173660/ENSG00000184983/ENSG00000125356/ENSG00000176340/ENSG00000131174/ENSG00000004779/ENSG00000154518/ENSG00000099795/ENSG00000115317/ENSG00000109390/ENSG00000184752/ENSG00000140990/ENSG00000241837/ENSG00000154723/ENSG00000135940/ENSG00000005022/ENSG00000119013/ENSG00000167792/ENSG00000168653…	COX6C/UBB/COX6B1/COX5A/NDUFB2/NDUFB1/UQCRH/NDUFA6/NDUFA1/COX8A/COX7B/NDUFAB1/ATP5MC3/NDUFB7/HTRA2/NDUFC1/NDUFA12/NDUFB10/ATP5PO/ATP5PF/COX5B/SLC25A5/NDUFB3/NDUFV1/NDUFS5/PARK7/NDUFS3	hsa:1345/hsa:7314/hsa:1340/hsa:9377/hsa:4708/hsa:4707/hsa:7388/hsa:4700/hsa:4694/hsa:1351/hsa:1349/hsa:4706/hsa:518/hsa:4713/hsa:27429/hsa:4717/hsa:55967/hsa:4716/hsa:539/hsa:522/hsa:1329/hsa:292/hsa:4709/hsa:4723/hsa:4725/hsa:11315/hsa:4722	27
hsa03040	Spliceosome	24/369	123/5472	1.58915e-06	5.72093e-05	ENSG00000170144/ENSG00000130332/ENSG00000125835/ENSG00000102103/ENSG00000125743/ENSG00000100650/ENSG00000063244/ENSG00000100028/ENSG00000104852/ENSG00000104897/ENSG00000143977/ENSG00000179950/ENSG00000111786/ENSG00000141543/ENSG00000167088/ENSG00000141759/ENSG00000124562/ENSG00000100138/ENSG00000143368/ENSG00000175467/ENSG00000116350/ENSG00000130520/ENSG00000109971/ENSG00000135486	HNRNPA3/LSM7/SNRPB/PQBP1/SNRPD2/SRSF5/U2AF2/SNRPD3/SNRNP70/SF3A2/SNRPG/PUF60/SRSF9/EIF4A3/SNRPD1/TXNL4A/SNRPC/SNU13/SF3B4/SART1/SRSF4/LSM4/HSPA8/HNRNPA1	hsa:220988/hsa:51690/hsa:6628/hsa:10084/hsa:6633/hsa:6430/hsa:11338/hsa:6634/hsa:6625/hsa:8175/hsa:6637/hsa:22827/hsa:8683/hsa:9775/hsa:6632/hsa:10907/hsa:6631/hsa:4809/hsa:10262/hsa:9092/hsa:6429/hsa:25804/hsa:3312/hsa:3178	24
hsa04932	Non-alcoholic fatty liver disease (NAFLD)	24/369	133/5472	6.70096e-06	0.00021108	ENSG00000184557/ENSG00000164919/ENSG00000126267/ENSG00000178741/ENSG00000090266/ENSG00000183648/ENSG00000173660/ENSG00000184983/ENSG00000171608/ENSG00000125356/ENSG00000176340/ENSG00000131174/ENSG00000004779/ENSG00000099795/ENSG00000127191/ENSG00000109390/ENSG00000184752/ENSG00000140990/ENSG00000135940/ENSG00000119013/ENSG00000167792/ENSG00000168653/ENSG00000213619/ENSG00000072310	SOCS3/COX6C/COX6B1/COX5A/NDUFB2/NDUFB1/UQCRH/NDUFA6/PIK3CD/NDUFA1/COX8A/COX7B/NDUFAB1/NDUFB7/TRAF2/NDUFC1/NDUFA12/NDUFB10/COX5B/NDUFB3/NDUFV1/NDUFS5/NDUFS3/SREBF1	hsa:9021/hsa:1345/hsa:1340/hsa:9377/hsa:4708/hsa:4707/hsa:7388/hsa:4700/hsa:5293/hsa:4694/hsa:1351/hsa:1349/hsa:4706/hsa:4713/hsa:7186/hsa:4717/hsa:55967/hsa:4716/hsa:1329/hsa:4709/hsa:4723/hsa:4725/hsa:4722/hsa:6720	24
hsa05010	Alzheimer disease	26/369	157/5472	1.39863e-05	0.000391617	ENSG00000166313/ENSG00000164919/ENSG00000126267/ENSG00000178741/ENSG00000090266/ENSG00000183648/ENSG00000173660/ENSG00000184983/ENSG00000125356/ENSG00000176340/ENSG00000072506/ENSG00000131174/ENSG00000004779/ENSG00000154518/ENSG00000099795/ENSG00000109390/ENSG00000184752/ENSG00000140990/ENSG00000241837/ENSG00000154723/ENSG00000135940/ENSG00000119013/ENSG00000159593/ENSG00000167792/ENSG00000168653…	APBB1/COX6C/COX6B1/COX5A/NDUFB2/NDUFB1/UQCRH/NDUFA6/NDUFA1/COX8A/HSD17B10/COX7B/NDUFAB1/ATP5MC3/NDUFB7/NDUFC1/NDUFA12/NDUFB10/ATP5PO/ATP5PF/COX5B/NDUFB3/NAE1/NDUFV1/NDUFS5/NDUFS3	hsa:322/hsa:1345/hsa:1340/hsa:9377/hsa:4708/hsa:4707/hsa:7388/hsa:4700/hsa:4694/hsa:1351/hsa:3028/hsa:1349/hsa:4706/hsa:518/hsa:4713/hsa:4717/hsa:55967/hsa:4716/hsa:539/hsa:522/hsa:1329/hsa:4709/hsa:8883/hsa:4723/hsa:4725/hsa:4722	26
hsa04714	Thermogenesis	30/369	213/5472	7.74437e-05	0.00195158	ENSG00000164919/ENSG00000126267/ENSG00000178741/ENSG00000090266/ENSG00000183648/ENSG00000173660/ENSG00000184983/ENSG00000125356/ENSG00000176340/ENSG00000131174/ENSG00000106615/ENSG00000004779/ENSG00000154518/ENSG00000099795/ENSG00000109390/ENSG00000184752/ENSG00000140990/ENSG00000204673/ENSG00000241837/ENSG00000174775/ENSG00000154723/ENSG00000138495/ENSG00000135940/ENSG00000197119/ENSG00000119013…	COX6C/COX6B1/COX5A/NDUFB2/NDUFB1/UQCRH/NDUFA6/NDUFA1/COX8A/COX7B/RHEB/NDUFAB1/ATP5MC3/NDUFB7/NDUFC1/NDUFA12/NDUFB10/AKT1S1/ATP5PO/HRAS/ATP5PF/COX17/COX5B/SLC25A29/NDUFB3/COX14/NDUFV1/NDUFS5/NDUFS3/COX18	hsa:1345/hsa:1340/hsa:9377/hsa:4708/hsa:4707/hsa:7388/hsa:4700/hsa:4694/hsa:1351/hsa:1349/hsa:6009/hsa:4706/hsa:518/hsa:4713/hsa:4717/hsa:55967/hsa:4716/hsa:84335/hsa:539/hsa:3265/hsa:522/hsa:10063/hsa:1329/hsa:123096/hsa:4709/hsa:84987/hsa:4723/hsa:4725/hsa:4722/hsa:285521	30
hsa03430	Mismatch repair	7/369	22/5472	0.000420989	0.00964448	ENSG00000132646/ENSG00000117748/ENSG00000174371/ENSG00000105486/ENSG00000049541/ENSG00000062822/ENSG00000116062	PCNA/RPA2/EXO1/LIG1/RFC2/POLD1/MSH6	hsa:5111/hsa:6118/hsa:9156/hsa:3978/hsa:5982/hsa:5424/hsa:2956	7

## Sheet: Cell_treated.up_KEGGenrich_
KEGGID	Description	GeneRatio	BgRatio	pvalue	padj	geneID	geneName	keggID	Count
hsa04512	ECM-receptor interaction	17/418	71/5472	1.62657e-05	0.000970047	ENSG00000137801/ENSG00000091136/ENSG00000259207/ENSG00000053747/ENSG00000130702/ENSG00000163359/ENSG00000115414/ENSG00000164692/ENSG00000108821/ENSG00000213949/ENSG00000138448/ENSG00000115232/ENSG00000187498/ENSG00000196569/ENSG00000150093/ENSG00000112769/ENSG00000101680	THBS1/LAMB1/ITGB3/LAMA3/LAMA5/COL6A3/FN1/COL1A2/COL1A1/ITGA1/ITGAV/ITGA4/COL4A1/LAMA2/ITGB1/LAMA4/LAMA1	hsa:7057/hsa:3912/hsa:3690/hsa:3909/hsa:3911/hsa:1293/hsa:2335/hsa:1278/hsa:1277/hsa:3672/hsa:3685/hsa:3676/hsa:1282/hsa:3908/hsa:3688/hsa:3910/hsa:284217	17
hsa05206	MicroRNAs in cancer	27/418	149/5472	1.70184e-05	0.000970047	ENSG00000100292/ENSG00000115419/ENSG00000124766/ENSG00000103222/ENSG00000136158/ENSG00000113721/ENSG00000137801/ENSG00000100234/ENSG00000171862/ENSG00000277443/ENSG00000074181/ENSG00000259207/ENSG00000140416/ENSG00000092969/ENSG00000204217/ENSG00000122707/ENSG00000113328/ENSG00000136997/ENSG00000067900/ENSG00000137710/ENSG00000154229/ENSG00000185950/ENSG00000149948/ENSG00000138061/ENSG00000109320…	HMOX1/GLS/SOX4/ABCC1/SPRY2/PDGFRB/THBS1/TIMP3/PTEN/MARCKS/NOTCH3/ITGB3/TPM1/TGFB2/BMPR2/RECK/CCNG1/MYC/ROCK1/RDX/PRKCA/IRS2/HMGA2/CYP1B1/NFKB1/ATM/VEGFA	hsa:3162/hsa:2744/hsa:6659/hsa:4363/hsa:10253/hsa:5159/hsa:7057/hsa:7078/hsa:5728/hsa:4082/hsa:4854/hsa:3690/hsa:7168/hsa:7042/hsa:659/hsa:8434/hsa:900/hsa:4609/hsa:6093/hsa:5962/hsa:5578/hsa:8660/hsa:8091/hsa:1545/hsa:4790/hsa:472/hsa:7422	27
hsa04974	Protein digestion and absorption	15/418	60/5472	2.96627e-05	0.00125396	ENSG00000168003/ENSG00000049540/ENSG00000060718/ENSG00000163359/ENSG00000164692/ENSG00000111799/ENSG00000108821/ENSG00000183023/ENSG00000204262/ENSG00000168542/ENSG00000171502/ENSG00000187498/ENSG00000163399/ENSG00000130635/ENSG00000124749	SLC3A2/ELN/COL11A1/COL6A3/COL1A2/COL12A1/COL1A1/SLC8A1/COL5A2/COL3A1/COL24A1/COL4A1/ATP1A1/COL5A1/COL21A1	hsa:6520/hsa:2006/hsa:1301/hsa:1293/hsa:1278/hsa:1303/hsa:1277/hsa:6546/hsa:1290/hsa:1281/hsa:255631/hsa:1282/hsa:476/hsa:1289/hsa:81578	15
hsa04350	TGF-beta signaling pathway	17/418	75/5472	3.50118e-05	0.00125396	ENSG00000122641/ENSG00000137801/ENSG00000172201/ENSG00000092969/ENSG00000204217/ENSG00000120693/ENSG00000101665/ENSG00000166949/ENSG00000163083/ENSG00000136997/ENSG00000067900/ENSG00000108443/ENSG00000147883/ENSG00000137834/ENSG00000049323/ENSG00000156466/ENSG00000106799	INHBA/THBS1/ID4/TGFB2/BMPR2/SMAD9/SMAD7/SMAD3/INHBB/MYC/ROCK1/RPS6KB1/CDKN2B/SMAD6/LTBP1/GDF6/TGFBR1	hsa:3624/hsa:7057/hsa:3400/hsa:7042/hsa:659/hsa:4093/hsa:4092/hsa:4088/hsa:3625/hsa:4609/hsa:6093/hsa:6198/hsa:1030/hsa:4091/hsa:4052/hsa:392255/hsa:7046	17
hsa04020	Calcium signaling pathway	25/418	138/5472	3.51988e-05	0.00125396	ENSG00000181072/ENSG00000101333/ENSG00000113721/ENSG00000182621/ENSG00000196557/ENSG00000115353/ENSG00000183023/ENSG00000198523/ENSG00000151067/ENSG00000174437/ENSG00000102893/ENSG00000138814/ENSG00000123104/ENSG00000107758/ENSG00000154229/ENSG00000058668/ENSG00000065534/ENSG00000168398/ENSG00000115252/ENSG00000070961/ENSG00000156052/ENSG00000167323/ENSG00000120899/ENSG00000043591/ENSG00000142875	CHRM2/PLCB4/PDGFRB/PLCB1/CACNA1H/TACR1/SLC8A1/PLN/CACNA1C/ATP2A2/PHKB/PPP3CA/ITPR2/PPP3CB/PRKCA/ATP2B4/MYLK/BDKRB2/PDE1A/ATP2B1/GNAQ/STIM1/PTK2B/ADRB1/PRKACB	hsa:1129/hsa:5332/hsa:5159/hsa:23236/hsa:8912/hsa:6869/hsa:6546/hsa:5350/hsa:775/hsa:488/hsa:5257/hsa:5530/hsa:3709/hsa:5532/hsa:5578/hsa:493/hsa:4638/hsa:624/hsa:5136/hsa:490/hsa:2776/hsa:6786/hsa:2185/hsa:153/hsa:5567	25
hsa04022	cGMP-PKG signaling pathway	24/418	131/5472	4.17441e-05	0.0013219	ENSG00000138735/ENSG00000101333/ENSG00000072952/ENSG00000182621/ENSG00000159899/ENSG00000183023/ENSG00000198523/ENSG00000185532/ENSG00000151067/ENSG00000174437/ENSG00000120063/ENSG00000138814/ENSG00000123104/ENSG00000067900/ENSG00000107758/ENSG00000163399/ENSG00000185950/ENSG00000058668/ENSG00000065534/ENSG00000168398/ENSG00000070961/ENSG00000156052/ENSG00000182158/ENSG00000043591	PDE5A/PLCB4/MRVI1/PLCB1/NPR2/SLC8A1/PLN/PRKG1/CACNA1C/ATP2A2/GNA13/PPP3CA/ITPR2/ROCK1/PPP3CB/ATP1A1/IRS2/ATP2B4/MYLK/BDKRB2/ATP2B1/GNAQ/CREB3L2/ADRB1	hsa:8654/hsa:5332/hsa:10335/hsa:23236/hsa:4882/hsa:6546/hsa:5350/hsa:5592/hsa:775/hsa:488/hsa:10672/hsa:5530/hsa:3709/hsa:6093/hsa:5532/hsa:476/hsa:8660/hsa:493/hsa:4638/hsa:624/hsa:490/hsa:2776/hsa:64764/hsa:153	24
hsa05414	Dilated cardiomyopathy (DCM)	16/418	72/5472	7.6718e-05	0.00218646	ENSG00000159251/ENSG00000259207/ENSG00000140416/ENSG00000092969/ENSG00000213949/ENSG00000138448/ENSG00000183023/ENSG00000198523/ENSG00000115232/ENSG00000151067/ENSG00000174437/ENSG00000184009/ENSG00000196569/ENSG00000150093/ENSG00000043591/ENSG00000142875	ACTC1/ITGB3/TPM1/TGFB2/ITGA1/ITGAV/SLC8A1/PLN/ITGA4/CACNA1C/ATP2A2/ACTG1/LAMA2/ITGB1/ADRB1/PRKACB	hsa:70/hsa:3690/hsa:7168/hsa:7042/hsa:3672/hsa:3685/hsa:6546/hsa:5350/hsa:3676/hsa:775/hsa:488/hsa:71/hsa:3908/hsa:3688/hsa:153/hsa:5567	16
hsa04925	Aldosterone synthesis and secretion	16/418	73/5472	9.14993e-05	0.00237066	ENSG00000101333/ENSG00000182621/ENSG00000196557/ENSG00000130164/ENSG00000151067/ENSG00000073060/ENSG00000123104/ENSG00000163399/ENSG00000154229/ENSG00000058668/ENSG00000115825/ENSG00000134780/ENSG00000070961/ENSG00000156052/ENSG00000182158/ENSG00000142875	PLCB4/PLCB1/CACNA1H/LDLR/CACNA1C/SCARB1/ITPR2/ATP1A1/PRKCA/ATP2B4/PRKD3/DAGLA/ATP2B1/GNAQ/CREB3L2/PRKACB	hsa:5332/hsa:23236/hsa:8912/hsa:3949/hsa:775/hsa:949/hsa:3709/hsa:476/hsa:5578/hsa:493/hsa:23683/hsa:747/hsa:490/hsa:2776/hsa:64764/hsa:5567	16
hsa04933	AGE-RAGE signaling pathway in diabetic complications	18/418	89/5472	0.000102995	0.00244614	ENSG00000120738/ENSG00000101333/ENSG00000169429/ENSG00000182621/ENSG00000145675/ENSG00000092969/ENSG00000115414/ENSG00000164692/ENSG00000108821/ENSG00000117525/ENSG00000168542/ENSG00000166949/ENSG00000187498/ENSG00000154229/ENSG00000115415/ENSG00000109320/ENSG00000106799/ENSG00000112715	EGR1/PLCB4/CXCL8/PLCB1/PIK3R1/TGFB2/FN1/COL1A2/COL1A1/F3/COL3A1/SMAD3/COL4A1/PRKCA/STAT1/NFKB1/TGFBR1/VEGFA	hsa:1958/hsa:5332/hsa:3576/hsa:23236/hsa:5295/hsa:7042/hsa:2335/hsa:1278/hsa:1277/hsa:2152/hsa:1281/hsa:4088/hsa:1282/hsa:5578/hsa:6772/hsa:4790/hsa:7046/hsa:7422	18
hsa05165	Human papillomavirus infection	40/418	288/5472	0.000122837	0.00269296	ENSG00000155760/ENSG00000114251/ENSG00000113721/ENSG00000137801/ENSG00000106003/ENSG00000171862/ENSG00000074181/ENSG00000091136/ENSG00000145675/ENSG00000259207/ENSG00000053747/ENSG00000130702/ENSG00000163359/ENSG00000115414/ENSG00000164692/ENSG00000108821/ENSG00000213949/ENSG00000164683/ENSG00000067182/ENSG00000138448/ENSG00000115232/ENSG00000114573/ENSG00000184384/ENSG00000187498/ENSG00000196569…	FZD7/WNT5A/PDGFRB/THBS1/LFNG/PTEN/NOTCH3/LAMB1/PIK3R1/ITGB3/LAMA3/LAMA5/COL6A3/FN1/COL1A2/COL1A1/ITGA1/HEY1/TNFRSF1A/ITGAV/ITGA4/ATP6V1A/MAML2/COL4A1/LAMA2/ITGB1/TCF7L2/PPP2R5A/LAMA4/LAMA1/RPS6KB1/STAT1/WNT2/NFKB1/ATM/CREB3L2/VEGFA/PRKACB/PPP2R3A/WNT2B	hsa:8324/hsa:7474/hsa:5159/hsa:7057/hsa:3955/hsa:5728/hsa:4854/hsa:3912/hsa:5295/hsa:3690/hsa:3909/hsa:3911/hsa:1293/hsa:2335/hsa:1278/hsa:1277/hsa:3672/hsa:23462/hsa:7132/hsa:3685/hsa:3676/hsa:523/hsa:84441/hsa:1282/hsa:3908/hsa:3688/hsa:6934/hsa:5525/hsa:3910/hsa:284217/hsa:6198/hsa:6772/hsa:7472/hsa:4790/hsa:472/hsa:64764/hsa:7422/hsa:5567/hsa:5523/hsa:7482	40
hsa04151	PI3K-Akt signaling pathway	39/418	284/5472	0.000191021	0.00380311	ENSG00000181072/ENSG00000138685/ENSG00000049130/ENSG00000109321/ENSG00000113721/ENSG00000137801/ENSG00000171862/ENSG00000124882/ENSG00000091136/ENSG00000145675/ENSG00000259207/ENSG00000053747/ENSG00000130702/ENSG00000163359/ENSG00000115414/ENSG00000154188/ENSG00000164692/ENSG00000168685/ENSG00000108821/ENSG00000213949/ENSG00000102755/ENSG00000138448/ENSG00000115232/ENSG00000187498/ENSG00000196569…	CHRM2/FGF2/KITLG/AREG/PDGFRB/THBS1/PTEN/EREG/LAMB1/PIK3R1/ITGB3/LAMA3/LAMA5/COL6A3/FN1/ANGPT1/COL1A2/IL7R/COL1A1/ITGA1/FLT1/ITGAV/ITGA4/COL4A1/LAMA2/MYC/ITGB1/PRKCA/PPP2R5A/LAMA4/TLR4/HSP90B1/LAMA1/RPS6KB1/PCK2/NFKB1/CREB3L2/VEGFA/PPP2R3A	hsa:1129/hsa:2247/hsa:4254/hsa:374/hsa:5159/hsa:7057/hsa:5728/hsa:2069/hsa:3912/hsa:5295/hsa:3690/hsa:3909/hsa:3911/hsa:1293/hsa:2335/hsa:284/hsa:1278/hsa:3575/hsa:1277/hsa:3672/hsa:2321/hsa:3685/hsa:3676/hsa:1282/hsa:3908/hsa:4609/hsa:3688/hsa:5578/hsa:5525/hsa:3910/hsa:7099/hsa:7184/hsa:284217/hsa:6198/hsa:5106/hsa:4790/hsa:64764/hsa:7422/hsa:5523	39
hsa04510	Focal adhesion	28/418	180/5472	0.000200164	0.00380311	ENSG00000113721/ENSG00000137801/ENSG00000171862/ENSG00000091136/ENSG00000145675/ENSG00000259207/ENSG00000053747/ENSG00000130702/ENSG00000163359/ENSG00000115414/ENSG00000164692/ENSG00000108821/ENSG00000213949/ENSG00000102755/ENSG00000138448/ENSG00000136068/ENSG00000115232/ENSG00000184009/ENSG00000100852/ENSG00000187498/ENSG00000196569/ENSG00000067900/ENSG00000150093/ENSG00000154229/ENSG00000112769…	PDGFRB/THBS1/PTEN/LAMB1/PIK3R1/ITGB3/LAMA3/LAMA5/COL6A3/FN1/COL1A2/COL1A1/ITGA1/FLT1/ITGAV/FLNB/ITGA4/ACTG1/ARHGAP5/COL4A1/LAMA2/ROCK1/ITGB1/PRKCA/LAMA4/MYLK/LAMA1/VEGFA	hsa:5159/hsa:7057/hsa:5728/hsa:3912/hsa:5295/hsa:3690/hsa:3909/hsa:3911/hsa:1293/hsa:2335/hsa:1278/hsa:1277/hsa:3672/hsa:2321/hsa:3685/hsa:2317/hsa:3676/hsa:71/hsa:394/hsa:1282/hsa:3908/hsa:6093/hsa:3688/hsa:5578/hsa:3910/hsa:4638/hsa:284217/hsa:7422	28
hsa04927	Cortisol synthesis and secretion	12/418	49/5472	0.000229998	0.00409684	ENSG00000101333/ENSG00000182621/ENSG00000196557/ENSG00000185630/ENSG00000130164/ENSG00000151067/ENSG00000073060/ENSG00000123104/ENSG00000169297/ENSG00000156052/ENSG00000182158/ENSG00000142875	PLCB4/PLCB1/CACNA1H/PBX1/LDLR/CACNA1C/SCARB1/ITPR2/NR0B1/GNAQ/CREB3L2/PRKACB	hsa:5332/hsa:23236/hsa:8912/hsa:5087/hsa:3949/hsa:775/hsa:949/hsa:3709/hsa:190/hsa:2776/hsa:64764/hsa:5567	12
hsa05412	Arrhythmogenic right ventricular cardiomyopathy (ARVC)	13/418	58/5472	0.00032835	0.0055047	ENSG00000259207/ENSG00000096696/ENSG00000213949/ENSG00000138448/ENSG00000183023/ENSG00000115232/ENSG00000151067/ENSG00000174437/ENSG00000184009/ENSG00000170558/ENSG00000196569/ENSG00000150093/ENSG00000148737	ITGB3/DSP/ITGA1/ITGAV/SLC8A1/ITGA4/CACNA1C/ATP2A2/ACTG1/CDH2/LAMA2/ITGB1/TCF7L2	hsa:3690/hsa:1832/hsa:3672/hsa:3685/hsa:6546/hsa:3676/hsa:775/hsa:488/hsa:71/hsa:1000/hsa:3908/hsa:3688/hsa:6934	13
hsa04810	Regulation of actin cytoskeleton	27/418	178/5472	0.000394346	0.00624382	ENSG00000181072/ENSG00000138685/ENSG00000113721/ENSG00000154380/ENSG00000107562/ENSG00000145675/ENSG00000259207/ENSG00000115414/ENSG00000213949/ENSG00000138448/ENSG00000158186/ENSG00000115232/ENSG00000184009/ENSG00000175866/ENSG00000120063/ENSG00000067900/ENSG00000137710/ENSG00000150093/ENSG00000196914/ENSG00000065534/ENSG00000138443/ENSG00000147202/ENSG00000168398/ENSG00000129675/ENSG00000115020…	CHRM2/FGF2/PDGFRB/ENAH/CXCL12/PIK3R1/ITGB3/FN1/ITGA1/ITGAV/MRAS/ITGA4/ACTG1/BAIAP2/GNA13/ROCK1/RDX/ITGB1/ARHGEF12/MYLK/ABI2/DIAPH2/BDKRB2/ARHGEF6/PIKFYVE/SSH1/NCKAP1	hsa:1129/hsa:2247/hsa:5159/hsa:55740/hsa:6387/hsa:5295/hsa:3690/hsa:2335/hsa:3672/hsa:3685/hsa:22808/hsa:3676/hsa:71/hsa:10458/hsa:10672/hsa:6093/hsa:5962/hsa:3688/hsa:23365/hsa:4638/hsa:10152/hsa:1730/hsa:624/hsa:9459/hsa:200576/hsa:54434/hsa:10787	27
hsa04918	Thyroid hormone synthesis	12/418	52/5472	0.000416902	0.00625353	ENSG00000044574/ENSG00000101333/ENSG00000182621/ENSG00000104687/ENSG00000042832/ENSG00000123104/ENSG00000163399/ENSG00000154229/ENSG00000166598/ENSG00000156052/ENSG00000182158/ENSG00000142875	HSPA5/PLCB4/PLCB1/GSR/TG/ITPR2/ATP1A1/PRKCA/HSP90B1/GNAQ/CREB3L2/PRKACB	hsa:3309/hsa:5332/hsa:23236/hsa:2936/hsa:7038/hsa:3709/hsa:476/hsa:5578/hsa:7184/hsa:2776/hsa:64764/hsa:5567	12
hsa04611	Platelet activation	18/418	101/5472	0.000538261	0.00767023	ENSG00000101333/ENSG00000182621/ENSG00000145675/ENSG00000259207/ENSG00000164692/ENSG00000108821/ENSG00000185532/ENSG00000184009/ENSG00000168542/ENSG00000120063/ENSG00000123104/ENSG00000067900/ENSG00000150093/ENSG00000196914/ENSG00000065534/ENSG00000156052/ENSG00000167323/ENSG00000142875	PLCB4/PLCB1/PIK3R1/ITGB3/COL1A2/COL1A1/PRKG1/ACTG1/COL3A1/GNA13/ITPR2/ROCK1/ITGB1/ARHGEF12/MYLK/GNAQ/STIM1/PRKACB	hsa:5332/hsa:23236/hsa:5295/hsa:3690/hsa:1278/hsa:1277/hsa:5592/hsa:71/hsa:1281/hsa:10672/hsa:3709/hsa:6093/hsa:3688/hsa:23365/hsa:4638/hsa:2776/hsa:6786/hsa:5567	18
hsa05145	Toxoplasmosis	15/418	80/5472	0.000895724	0.0121563	ENSG00000091136/ENSG00000092969/ENSG00000053747/ENSG00000130702/ENSG00000067182/ENSG00000130164/ENSG00000196569/ENSG00000150093/ENSG00000112769/ENSG00000136869/ENSG00000101680/ENSG00000115415/ENSG00000109320/ENSG00000087258/ENSG00000055208	LAMB1/TGFB2/LAMA3/LAMA5/TNFRSF1A/LDLR/LAMA2/ITGB1/LAMA4/TLR4/LAMA1/STAT1/NFKB1/GNAO1/TAB2	hsa:3912/hsa:7042/hsa:3909/hsa:3911/hsa:7132/hsa:3949/hsa:3908/hsa:3688/hsa:3910/hsa:7099/hsa:284217/hsa:6772/hsa:4790/hsa:2775/hsa:23118	15
hsa04919	Thyroid hormone signaling pathway	17/418	98/5472	0.00104771	0.0135726	ENSG00000211448/ENSG00000101333/ENSG00000074181/ENSG00000182621/ENSG00000145675/ENSG00000259207/ENSG00000138448/ENSG00000100644/ENSG00000198523/ENSG00000174437/ENSG00000184009/ENSG00000084676/ENSG00000136997/ENSG00000163399/ENSG00000154229/ENSG00000115415/ENSG00000142875	DIO2/PLCB4/NOTCH3/PLCB1/PIK3R1/ITGB3/ITGAV/HIF1A/PLN/ATP2A2/ACTG1/NCOA1/MYC/ATP1A1/PRKCA/STAT1/PRKACB	hsa:1734/hsa:5332/hsa:4854/hsa:23236/hsa:5295/hsa:3690/hsa:3685/hsa:3091/hsa:5350/hsa:488/hsa:71/hsa:8648/hsa:4609/hsa:476/hsa:5578/hsa:6772/hsa:5567	17
hsa04216	Ferroptosis	9/418	36/5472	0.0011894	0.0147382	ENSG00000151012/ENSG00000100292/ENSG00000168003/ENSG00000023909/ENSG00000001084/ENSG00000266412/ENSG00000123983/ENSG00000068366/ENSG00000087086	SLC7A11/HMOX1/SLC3A2/GCLM/GCLC/NCOA4/ACSL3/ACSL4/FTL	hsa:23657/hsa:3162/hsa:6520/hsa:2730/hsa:2729/hsa:8031/hsa:2181/hsa:2182/hsa:2512	9
hsa05410	Hypertrophic cardiomyopathy (HCM)	13/418	67/5472	0.00140295	0.0158788	ENSG00000159251/ENSG00000259207/ENSG00000140416/ENSG00000092969/ENSG00000213949/ENSG00000138448/ENSG00000183023/ENSG00000115232/ENSG00000151067/ENSG00000174437/ENSG00000184009/ENSG00000196569/ENSG00000150093	ACTC1/ITGB3/TPM1/TGFB2/ITGA1/ITGAV/SLC8A1/ITGA4/CACNA1C/ATP2A2/ACTG1/LAMA2/ITGB1	hsa:70/hsa:3690/hsa:7168/hsa:7042/hsa:3672/hsa:3685/hsa:6546/hsa:3676/hsa:775/hsa:488/hsa:71/hsa:3908/hsa:3688	13
hsa04961	Endocrine and other factor-regulated calcium reabsorption	9/418	37/5472	0.00146777	0.0158788	ENSG00000101333/ENSG00000182621/ENSG00000183023/ENSG00000163399/ENSG00000154229/ENSG00000168398/ENSG00000070961/ENSG00000156052/ENSG00000142875	PLCB4/PLCB1/SLC8A1/ATP1A1/PRKCA/BDKRB2/ATP2B1/GNAQ/PRKACB	hsa:5332/hsa:23236/hsa:6546/hsa:476/hsa:5578/hsa:624/hsa:490/hsa:2776/hsa:5567	9
hsa04261	Adrenergic signaling in cardiomyocytes	18/418	110/5472	0.00151569	0.0158788	ENSG00000159251/ENSG00000101333/ENSG00000182621/ENSG00000140416/ENSG00000183023/ENSG00000198523/ENSG00000151067/ENSG00000174437/ENSG00000163399/ENSG00000154229/ENSG00000066027/ENSG00000058668/ENSG00000070961/ENSG00000156052/ENSG00000182158/ENSG00000043591/ENSG00000142875/ENSG00000073711	ACTC1/PLCB4/PLCB1/TPM1/SLC8A1/PLN/CACNA1C/ATP2A2/ATP1A1/PRKCA/PPP2R5A/ATP2B4/ATP2B1/GNAQ/CREB3L2/ADRB1/PRKACB/PPP2R3A	hsa:70/hsa:5332/hsa:23236/hsa:7168/hsa:6546/hsa:5350/hsa:775/hsa:488/hsa:476/hsa:5578/hsa:5525/hsa:493/hsa:490/hsa:2776/hsa:64764/hsa:153/hsa:5567/hsa:5523	18
hsa05418	Fluid shear stress and atherosclerosis	19/418	119/5472	0.00152817	0.0158788	ENSG00000100292/ENSG00000145675/ENSG00000259207/ENSG00000204217/ENSG00000067182/ENSG00000008394/ENSG00000138448/ENSG00000161011/ENSG00000181019/ENSG00000184009/ENSG00000115594/ENSG00000170345/ENSG00000130707/ENSG00000166598/ENSG00000063660/ENSG00000170899/ENSG00000116044/ENSG00000109320/ENSG00000112715	HMOX1/PIK3R1/ITGB3/BMPR2/TNFRSF1A/MGST1/ITGAV/SQSTM1/NQO1/ACTG1/IL1R1/FOS/ASS1/HSP90B1/GPC1/GSTA4/NFE2L2/NFKB1/VEGFA	hsa:3162/hsa:5295/hsa:3690/hsa:659/hsa:7132/hsa:4257/hsa:3685/hsa:8878/hsa:1728/hsa:71/hsa:3554/hsa:2353/hsa:445/hsa:7184/hsa:2817/hsa:2941/hsa:4780/hsa:4790/hsa:7422	19
hsa05163	Human cytomegalovirus infection	25/418	175/5472	0.00156002	0.0158788	ENSG00000101333/ENSG00000107562/ENSG00000169429/ENSG00000182621/ENSG00000145675/ENSG00000259207/ENSG00000067182/ENSG00000138448/ENSG00000120063/ENSG00000138814/ENSG00000123104/ENSG00000136997/ENSG00000115594/ENSG00000067900/ENSG00000107758/ENSG00000154229/ENSG00000196914/ENSG00000108443/ENSG00000109320/ENSG00000087258/ENSG00000156052/ENSG00000182158/ENSG00000112715/ENSG00000120899/ENSG00000142875	PLCB4/CXCL12/CXCL8/PLCB1/PIK3R1/ITGB3/TNFRSF1A/ITGAV/GNA13/PPP3CA/ITPR2/MYC/IL1R1/ROCK1/PPP3CB/PRKCA/ARHGEF12/RPS6KB1/NFKB1/GNAO1/GNAQ/CREB3L2/VEGFA/PTK2B/PRKACB	hsa:5332/hsa:6387/hsa:3576/hsa:23236/hsa:5295/hsa:3690/hsa:7132/hsa:3685/hsa:10672/hsa:5530/hsa:3709/hsa:4609/hsa:3554/hsa:6093/hsa:5532/hsa:5578/hsa:23365/hsa:6198/hsa:4790/hsa:2775/hsa:2776/hsa:64764/hsa:7422/hsa:2185/hsa:5567	25
hsa05222	Small cell lung cancer	15/418	85/5472	0.00170534	0.0167594	ENSG00000171862/ENSG00000091136/ENSG00000145675/ENSG00000053747/ENSG00000130702/ENSG00000115414/ENSG00000138448/ENSG00000187498/ENSG00000196569/ENSG00000136997/ENSG00000150093/ENSG00000112769/ENSG00000101680/ENSG00000147883/ENSG00000109320	PTEN/LAMB1/PIK3R1/LAMA3/LAMA5/FN1/ITGAV/COL4A1/LAMA2/MYC/ITGB1/LAMA4/LAMA1/CDKN2B/NFKB1	hsa:5728/hsa:3912/hsa:5295/hsa:3909/hsa:3911/hsa:2335/hsa:3685/hsa:1282/hsa:3908/hsa:4609/hsa:3688/hsa:3910/hsa:284217/hsa:1030/hsa:4790	15
hsa04978	Mineral absorption	9/418	38/5472	0.0017962	0.0168474	ENSG00000100292/ENSG00000183023/ENSG00000092439/ENSG00000136868/ENSG00000170385/ENSG00000163399/ENSG00000087086/ENSG00000070961/ENSG00000165240	HMOX1/SLC8A1/TRPM7/SLC31A1/SLC30A1/ATP1A1/FTL/ATP2B1/ATP7A	hsa:3162/hsa:6546/hsa:54822/hsa:1317/hsa:7779/hsa:476/hsa:2512/hsa:490/hsa:538	9
hsa03320	PPAR signaling pathway	11/418	53/5472	0.00183252	0.0168474	ENSG00000167772/ENSG00000065833/ENSG00000099194/ENSG00000173391/ENSG00000110090/ENSG00000134824/ENSG00000123983/ENSG00000147872/ENSG00000068366/ENSG00000100889/ENSG00000150991	ANGPTL4/ME1/SCD/OLR1/CPT1A/FADS2/ACSL3/PLIN2/ACSL4/PCK2/UBC	hsa:51129/hsa:4199/hsa:6319/hsa:4973/hsa:1374/hsa:9415/hsa:2181/hsa:123/hsa:2182/hsa:5106/hsa:7316	11
hsa05142	Chagas disease (American trypanosomiasis)	14/418	79/5472	0.00231127	0.0205847	ENSG00000101333/ENSG00000169429/ENSG00000182621/ENSG00000145675/ENSG00000092969/ENSG00000067182/ENSG00000166949/ENSG00000170345/ENSG00000136869/ENSG00000168398/ENSG00000109320/ENSG00000087258/ENSG00000156052/ENSG00000106799	PLCB4/CXCL8/PLCB1/PIK3R1/TGFB2/TNFRSF1A/SMAD3/FOS/TLR4/BDKRB2/NFKB1/GNAO1/GNAQ/TGFBR1	hsa:5332/hsa:3576/hsa:23236/hsa:5295/hsa:7042/hsa:7132/hsa:4088/hsa:2353/hsa:7099/hsa:624/hsa:4790/hsa:2775/hsa:2776/hsa:7046	14
hsa04060	Cytokine-cytokine receptor interaction	23/418	163/5472	0.00279465	0.0241356	ENSG00000122641/ENSG00000107562/ENSG00000169429/ENSG00000163739/ENSG00000092969/ENSG00000168685/ENSG00000204217/ENSG00000067182/ENSG00000146072/ENSG00000100368/ENSG00000130513/ENSG00000139567/ENSG00000163702/ENSG00000163083/ENSG00000115594/ENSG00000095752/ENSG00000128342/ENSG00000156466/ENSG00000181634/ENSG00000144476/ENSG00000106799/ENSG00000134352/ENSG00000116678	INHBA/CXCL12/CXCL8/CXCL1/TGFB2/IL7R/BMPR2/TNFRSF1A/TNFRSF21/CSF2RB/GDF15/ACVRL1/IL17RC/INHBB/IL1R1/IL11/LIF/GDF6/TNFSF15/ACKR3/TGFBR1/IL6ST/LEPR	hsa:3624/hsa:6387/hsa:3576/hsa:2919/hsa:7042/hsa:3575/hsa:659/hsa:7132/hsa:27242/hsa:1439/hsa:9518/hsa:94/hsa:84818/hsa:3625/hsa:3554/hsa:3589/hsa:3976/hsa:392255/hsa:9966/hsa:57007/hsa:7046/hsa:3572/hsa:3953	23
hsa04390	Hippo signaling pathway	20/418	136/5472	0.00318715	0.0267158	ENSG00000155760/ENSG00000114251/ENSG00000109321/ENSG00000118523/ENSG00000139926/ENSG00000092969/ENSG00000204217/ENSG00000101665/ENSG00000184009/ENSG00000166949/ENSG00000136997/ENSG00000019549/ENSG00000187079/ENSG00000148737/ENSG00000105989/ENSG00000156466/ENSG00000131023/ENSG00000106799/ENSG00000074047/ENSG00000134245	FZD7/WNT5A/AREG/CTGF/FRMD6/TGFB2/BMPR2/SMAD7/ACTG1/SMAD3/MYC/SNAI2/TEAD1/TCF7L2/WNT2/GDF6/LATS1/TGFBR1/GLI2/WNT2B	hsa:8324/hsa:7474/hsa:374/hsa:1490/hsa:122786/hsa:7042/hsa:659/hsa:4092/hsa:71/hsa:4088/hsa:4609/hsa:6591/hsa:7003/hsa:6934/hsa:7472/hsa:392255/hsa:9113/hsa:7046/hsa:2736/hsa:7482	20
hsa04970	Salivary secretion	11/418	57/5472	0.0033628	0.0271408	ENSG00000101333/ENSG00000182621/ENSG00000185532/ENSG00000123104/ENSG00000163399/ENSG00000154229/ENSG00000058668/ENSG00000070961/ENSG00000156052/ENSG00000043591/ENSG00000142875	PLCB4/PLCB1/PRKG1/ITPR2/ATP1A1/PRKCA/ATP2B4/ATP2B1/GNAQ/ADRB1/PRKACB	hsa:5332/hsa:23236/hsa:5592/hsa:3709/hsa:476/hsa:5578/hsa:493/hsa:490/hsa:2776/hsa:153/hsa:5567	11
hsa04550	Signaling pathways regulating pluripotency of stem cells	17/418	109/5472	0.00342831	0.0271408	ENSG00000155760/ENSG00000138685/ENSG00000114251/ENSG00000122641/ENSG00000084093/ENSG00000172201/ENSG00000145675/ENSG00000135111/ENSG00000204217/ENSG00000120693/ENSG00000166949/ENSG00000163083/ENSG00000136997/ENSG00000128342/ENSG00000105989/ENSG00000134352/ENSG00000134245	FZD7/FGF2/WNT5A/INHBA/REST/ID4/PIK3R1/TBX3/BMPR2/SMAD9/SMAD3/INHBB/MYC/LIF/WNT2/IL6ST/WNT2B	hsa:8324/hsa:2247/hsa:7474/hsa:3624/hsa:5978/hsa:3400/hsa:5295/hsa:6926/hsa:659/hsa:4093/hsa:4088/hsa:3625/hsa:4609/hsa:3976/hsa:7472/hsa:3572/hsa:7482	17
hsa04934	Cushing syndrome	19/418	128/5472	0.00360088	0.0277365	ENSG00000155760/ENSG00000114251/ENSG00000101333/ENSG00000182621/ENSG00000106546/ENSG00000196557/ENSG00000185630/ENSG00000130164/ENSG00000151067/ENSG00000073060/ENSG00000123104/ENSG00000148737/ENSG00000147883/ENSG00000117222/ENSG00000105989/ENSG00000156052/ENSG00000182158/ENSG00000142875/ENSG00000134245	FZD7/WNT5A/PLCB4/PLCB1/AHR/CACNA1H/PBX1/LDLR/CACNA1C/SCARB1/ITPR2/TCF7L2/CDKN2B/RBBP5/WNT2/GNAQ/CREB3L2/PRKACB/WNT2B	hsa:8324/hsa:7474/hsa:5332/hsa:23236/hsa:196/hsa:8912/hsa:5087/hsa:3949/hsa:775/hsa:949/hsa:3709/hsa:6934/hsa:1030/hsa:5929/hsa:7472/hsa:2776/hsa:64764/hsa:5567/hsa:7482	19
hsa05143	African trypanosomiasis	6/418	21/5472	0.00386764	0.0283005	ENSG00000101333/ENSG00000164251/ENSG00000182621/ENSG00000154229/ENSG00000112769/ENSG00000156052	PLCB4/F2RL1/PLCB1/PRKCA/LAMA4/GNAQ	hsa:5332/hsa:2150/hsa:23236/hsa:5578/hsa:3910/hsa:2776	6
hsa05323	Rheumatoid arthritis	11/418	58/5472	0.0038727	0.0283005	ENSG00000107562/ENSG00000169429/ENSG00000163739/ENSG00000092969/ENSG00000154188/ENSG00000102755/ENSG00000114573/ENSG00000170345/ENSG00000136869/ENSG00000095752/ENSG00000112715	CXCL12/CXCL8/CXCL1/TGFB2/ANGPT1/FLT1/ATP6V1A/FOS/TLR4/IL11/VEGFA	hsa:6387/hsa:3576/hsa:2919/hsa:7042/hsa:284/hsa:2321/hsa:523/hsa:2353/hsa:7099/hsa:3589/hsa:7422	11
hsa04270	Vascular smooth muscle contraction	15/418	93/5472	0.00421607	0.0300395	ENSG00000101333/ENSG00000072952/ENSG00000182621/ENSG00000159899/ENSG00000185532/ENSG00000151067/ENSG00000120063/ENSG00000123104/ENSG00000067900/ENSG00000154229/ENSG00000196914/ENSG00000065534/ENSG00000123739/ENSG00000156052/ENSG00000142875	PLCB4/MRVI1/PLCB1/NPR2/PRKG1/CACNA1C/GNA13/ITPR2/ROCK1/PRKCA/ARHGEF12/MYLK/PLA2G12A/GNAQ/PRKACB	hsa:5332/hsa:10335/hsa:23236/hsa:4882/hsa:5592/hsa:775/hsa:10672/hsa:3709/hsa:6093/hsa:5578/hsa:23365/hsa:4638/hsa:81579/hsa:2776/hsa:5567	15
hsa04924	Renin secretion	10/418	51/5472	0.00451836	0.0314081	ENSG00000101333/ENSG00000182621/ENSG00000151067/ENSG00000138814/ENSG00000123104/ENSG00000107758/ENSG00000115252/ENSG00000156052/ENSG00000043591/ENSG00000142875	PLCB4/PLCB1/CACNA1C/PPP3CA/ITPR2/PPP3CB/PDE1A/GNAQ/ADRB1/PRKACB	hsa:5332/hsa:23236/hsa:775/hsa:5530/hsa:3709/hsa:5532/hsa:5136/hsa:2776/hsa:153/hsa:5567	10
hsa04724	Glutamatergic synapse	15/418	97/5472	0.00630569	0.0427886	ENSG00000115419/ENSG00000101333/ENSG00000164418/ENSG00000182621/ENSG00000151067/ENSG00000161681/ENSG00000138814/ENSG00000123104/ENSG00000107758/ENSG00000154229/ENSG00000152413/ENSG00000251322/ENSG00000087258/ENSG00000156052/ENSG00000142875	GLS/PLCB4/GRIK2/PLCB1/CACNA1C/SHANK1/PPP3CA/ITPR2/PPP3CB/PRKCA/HOMER1/SHANK3/GNAO1/GNAQ/PRKACB	hsa:2744/hsa:5332/hsa:2898/hsa:23236/hsa:775/hsa:50944/hsa:5530/hsa:3709/hsa:5532/hsa:5578/hsa:9456/hsa:85358/hsa:2775/hsa:2776/hsa:5567	15
hsa04659	Th17 cell differentiation	12/418	71/5472	0.0068825	0.0455156	ENSG00000159216/ENSG00000106546/ENSG00000100644/ENSG00000138814/ENSG00000166949/ENSG00000115594/ENSG00000107758/ENSG00000170345/ENSG00000115415/ENSG00000109320/ENSG00000106799/ENSG00000134352	RUNX1/AHR/HIF1A/PPP3CA/SMAD3/IL1R1/PPP3CB/FOS/STAT1/NFKB1/TGFBR1/IL6ST	hsa:861/hsa:196/hsa:3091/hsa:5530/hsa:4088/hsa:3554/hsa:5532/hsa:2353/hsa:6772/hsa:4790/hsa:7046/hsa:3572	12
hsa01212	Fatty acid metabolism	9/418	46/5472	0.00704175	0.0455156	ENSG00000099194/ENSG00000110090/ENSG00000134824/ENSG00000123983/ENSG00000149485/ENSG00000068366/ENSG00000012660/ENSG00000167315/ENSG00000188921	SCD/CPT1A/FADS2/ACSL3/FADS1/ACSL4/ELOVL5/ACAA2/HACD4	hsa:6319/hsa:1374/hsa:9415/hsa:2181/hsa:3992/hsa:2182/hsa:60481/hsa:10449/hsa:401494	9
hsa05225	Hepatocellular carcinoma	20/418	146/5472	0.00718667	0.0455156	ENSG00000198431/ENSG00000100292/ENSG00000155760/ENSG00000114251/ENSG00000171862/ENSG00000145675/ENSG00000092969/ENSG00000008394/ENSG00000181019/ENSG00000184009/ENSG00000166949/ENSG00000136997/ENSG00000154229/ENSG00000148737/ENSG00000108443/ENSG00000170899/ENSG00000105989/ENSG00000116044/ENSG00000106799/ENSG00000134245	TXNRD1/HMOX1/FZD7/WNT5A/PTEN/PIK3R1/TGFB2/MGST1/NQO1/ACTG1/SMAD3/MYC/PRKCA/TCF7L2/RPS6KB1/GSTA4/WNT2/NFE2L2/TGFBR1/WNT2B	hsa:7296/hsa:3162/hsa:8324/hsa:7474/hsa:5728/hsa:5295/hsa:7042/hsa:4257/hsa:1728/hsa:71/hsa:4088/hsa:4609/hsa:5578/hsa:6934/hsa:6198/hsa:2941/hsa:7472/hsa:4780/hsa:7046/hsa:7482	20

## Sheet: Casp_treated.down_KEGGenric
KEGGID	Description	GeneRatio	BgRatio	pvalue	padj	geneID	geneName	keggID	Count
hsa03008	Ribosome biogenesis in eukaryotes	56/1739	73/5721	2.91919e-16	8.9911e-14	ENSG00000126524/ENSG00000132341/ENSG00000107937/ENSG00000101361/ENSG00000130826/ENSG00000165271/ENSG00000055044/ENSG00000134697/ENSG00000189306/ENSG00000136718/ENSG00000070814/ENSG00000108651/ENSG00000163938/ENSG00000132661/ENSG00000178718/ENSG00000163811/ENSG00000242372/ENSG00000165733/ENSG00000109534/ENSG00000104356/ENSG00000106344/ENSG00000172336/ENSG00000041802/ENSG00000164338/ENSG00000145375…	SBDS/RAN/GTPBP4/NOP56/DKC1/NOL6/NOP58/GNL2/RRP7A/IMP4/TCOF1/UTP6/GNL3/NXT1/RPP25/WDR43/EIF6/BMS1/GAR1/POP1/RBM28/POP7/LSG1/UTP15/SPATA5/WDR36/MDN1/FBL/HEATR1/RPP40/TBL3/WDR3/UTP18/RPP30/EMG1/RIOK2/SNU13/REXO5/RCL1/NMD3/NHP2/NVL/DROSHA/GNL3L/WDR75/REXO1/UTP14A/NOP10/NAT10/XPO1/NXF1/MPHOSPH10/UTP14C/POP5/RIOK1/NOB1	hsa:51119/hsa:5901/hsa:23560/hsa:10528/hsa:1736/hsa:65083/hsa:51602/hsa:29889/hsa:27341/hsa:92856/hsa:6949/hsa:55813/hsa:26354/hsa:29107/hsa:54913/hsa:23160/hsa:3692/hsa:9790/hsa:54433/hsa:10940/hsa:55131/hsa:10248/hsa:55341/hsa:84135/hsa:166378/hsa:134430/hsa:23195/hsa:2091/hsa:55127/hsa:10799/hsa:10607/hsa:10885/hsa:51096/hsa:10556/hsa:10436/hsa:55781/hsa:4809/hsa:81691/hsa:10171/hsa:51068/hsa:…	56
hsa03040	Spliceosome	80/1739	123/5721	1.22977e-15	1.89385e-13	ENSG00000112081/ENSG00000170144/ENSG00000115875/ENSG00000183684/ENSG00000099783/ENSG00000135486/ENSG00000167088/ENSG00000136875/ENSG00000125835/ENSG00000109971/ENSG00000143368/ENSG00000137168/ENSG00000109606/ENSG00000136450/ENSG00000179950/ENSG00000113649/ENSG00000183431/ENSG00000141543/ENSG00000117360/ENSG00000134453/ENSG00000060688/ENSG00000136937/ENSG00000163714/ENSG00000131876/ENSG00000136527…	SRSF3/HNRNPA3/SRSF7/ALYREF/HNRNPM/HNRNPA1/SNRPD1/PRPF4/SNRPB/HSPA8/SF3B4/PPIL1/DHX15/SRSF1/PUF60/TCERG1/SF3A3/EIF4A3/PRPF3/RBM17/SNRNP40/NCBP1/U2SURP/SNRPA1/TRA2B/SNRPC/PRPF19/CTNNBL1/PHF5A/LSM5/RBM25/SNRPF/DDX46/MAGOHB/TXNL4A/SNRPA/DDX23/LSM4/SNU13/EFTUD2/HNRNPU/LSM7/SNRPD3/MAGOH/LSM6/PRPF40A/SMNDC1/U2AF2/USP39/LSM8/SRSF2/SRSF10/SF3A1/SNRPE/RBMX/SNRPB2/SART1/SNRNP27/SF3B3/SRSF4/RP9/BUD31/HSPA2/C…	hsa:6428/hsa:220988/hsa:6432/hsa:10189/hsa:4670/hsa:3178/hsa:6632/hsa:9128/hsa:6628/hsa:3312/hsa:10262/hsa:51645/hsa:1665/hsa:6426/hsa:22827/hsa:10915/hsa:10946/hsa:9775/hsa:9129/hsa:84991/hsa:9410/hsa:4686/hsa:23350/hsa:6627/hsa:6434/hsa:6631/hsa:27339/hsa:56259/hsa:84844/hsa:23658/hsa:58517/hsa:6636/hsa:9879/hsa:55110/hsa:10907/hsa:6626/hsa:9416/hsa:25804/hsa:4809/hsa:9343/hsa:3192/hsa:51690/hs…	80
hsa04110	Cell cycle	78/1739	120/5721	2.97726e-15	3.05665e-13	ENSG00000117399/ENSG00000104738/ENSG00000094804/ENSG00000112118/ENSG00000127564/ENSG00000100297/ENSG00000101412/ENSG00000145386/ENSG00000092969/ENSG00000170312/ENSG00000134057/ENSG00000166851/ENSG00000169679/ENSG00000091651/ENSG00000076003/ENSG00000093009/ENSG00000128245/ENSG00000099860/ENSG00000135476/ENSG00000112576/ENSG00000198176/ENSG00000110092/ENSG00000166508/ENSG00000112742/ENSG00000157456…	CDC20/MCM4/CDC6/MCM3/PKMYT1/MCM5/E2F1/CCNA2/TGFB2/CDK1/CCNB1/PLK1/BUB1/ORC6/MCM6/CDC45/YWHAH/GADD45B/ESPL1/CCND3/TFDP1/CCND1/MCM7/TTK/CCNB2/CDC25A/MAD2L1/CDK2/PCNA/BUB1B/CDKN2C/SMC1A/SKP2/PTTG1/RBL1/MCM2/CDK6/ORC1/DBF4/RB1/BUB3/CDC7/YWHAZ/ANAPC7/ATR/MAD1L1/E2F2/SMC3/E2F4/CDC25C/CCNE2/STAG1/CCNE1/CUL1/PRKDC/MYC/YWHAG/YWHAE/ORC5/CDC27/WEE1/CCNH/CDC23/YWHAB/CDC16/E2F3/ANAPC1/CHEK1/ANAPC4/RAD21/CHEK2…	hsa:991/hsa:4173/hsa:990/hsa:4172/hsa:9088/hsa:4174/hsa:1869/hsa:890/hsa:7042/hsa:983/hsa:891/hsa:5347/hsa:699/hsa:23594/hsa:4175/hsa:8318/hsa:7533/hsa:4616/hsa:9700/hsa:896/hsa:7027/hsa:595/hsa:4176/hsa:7272/hsa:9133/hsa:993/hsa:4085/hsa:1017/hsa:5111/hsa:701/hsa:1031/hsa:8243/hsa:6502/hsa:9232/hsa:5933/hsa:4171/hsa:1021/hsa:4998/hsa:10926/hsa:5925/hsa:9184/hsa:8317/hsa:7534/hsa:51434/hsa:545/hs…	78
hsa03013	RNA transport	88/1739	156/5721	7.3887e-12	5.6893e-10	ENSG00000013810/ENSG00000100401/ENSG00000132341/ENSG00000095319/ENSG00000104131/ENSG00000134001/ENSG00000102900/ENSG00000183684/ENSG00000085415/ENSG00000173674/ENSG00000125450/ENSG00000151247/ENSG00000093000/ENSG00000155561/ENSG00000124571/ENSG00000114867/ENSG00000213024/ENSG00000108424/ENSG00000058804/ENSG00000113569/ENSG00000205937/ENSG00000139496/ENSG00000132661/ENSG00000070785/ENSG00000178718…	TACC3/RANGAP1/RAN/NUP188/EIF3J/EIF2S1/NUP93/ALYREF/SEH1L/EIF1AX/NUP85/EIF4E/NUP50/NUP205/XPO5/EIF4G1/NUP62/KPNB1/NDC1/NUP155/RNPS1/NUP58/NXT1/EIF2B3/RPP25/NUP98/PNN/NUP153/EIF2S2/NUP43/EIF4A3/EIF5B/POP1/GEMIN4/POP7/EIF5/ELAC2/GEMIN5/NUP88/SEC13/NUP107/NCBP1/NUP35/STRAP/RPP40/EIF4G2/PABPC1L/NUP54/XPOT/DDX20/PRMT5/TRNT1/RPP30/MAGOHB/EIF4EBP1/FXR2/SRRM1/NUP160/EIF3B/POM121C/MAGOH/NMD3/NUPL2/EIF4E2/E…	hsa:10460/hsa:5905/hsa:5901/hsa:23511/hsa:8669/hsa:1965/hsa:9688/hsa:10189/hsa:81929/hsa:1964/hsa:79902/hsa:1977/hsa:10762/hsa:23165/hsa:57510/hsa:1981/hsa:23636/hsa:3837/hsa:55706/hsa:9631/hsa:10921/hsa:9818/hsa:29107/hsa:8891/hsa:54913/hsa:4928/hsa:5411/hsa:9972/hsa:8894/hsa:348995/hsa:9775/hsa:9669/hsa:10940/hsa:50628/hsa:10248/hsa:1983/hsa:60528/hsa:25929/hsa:4927/hsa:6396/hsa:57122/hsa:4686/…	88
hsa03030	DNA replication	30/1739	35/5721	1.49604e-11	9.21561e-10	ENSG00000104738/ENSG00000112118/ENSG00000100297/ENSG00000168496/ENSG00000076003/ENSG00000177084/ENSG00000133119/ENSG00000166508/ENSG00000132646/ENSG00000163918/ENSG00000062822/ENSG00000073111/ENSG00000049541/ENSG00000077514/ENSG00000101868/ENSG00000117748/ENSG00000148229/ENSG00000014138/ENSG00000146143/ENSG00000105486/ENSG00000138346/ENSG00000100479/ENSG00000111445/ENSG00000132383/ENSG00000106628…	MCM4/MCM3/MCM5/FEN1/MCM6/POLE/RFC3/MCM7/PCNA/RFC4/POLD1/MCM2/RFC2/POLD3/POLA1/RPA2/POLE3/POLA2/PRIM2/LIG1/DNA2/POLE2/RFC5/RPA1/POLD2/PRIM1/RNASEH1/RPA3/RNASEH2C/POLE4	hsa:4173/hsa:4172/hsa:4174/hsa:2237/hsa:4175/hsa:5426/hsa:5983/hsa:4176/hsa:5111/hsa:5984/hsa:5424/hsa:4171/hsa:5982/hsa:10714/hsa:5422/hsa:6118/hsa:54107/hsa:23649/hsa:5558/hsa:3978/hsa:1763/hsa:5427/hsa:5985/hsa:6117/hsa:5425/hsa:5557/hsa:246243/hsa:6119/hsa:84153/hsa:56655	30
hsa00240	Pyrimidine metabolism	57/1739	97/5721	5.07624e-09	2.6058e-07	ENSG00000171793/ENSG00000171848/ENSG00000143179/ENSG00000167900/ENSG00000177084/ENSG00000084774/ENSG00000156136/ENSG00000062822/ENSG00000077514/ENSG00000167325/ENSG00000101868/ENSG00000176890/ENSG00000239672/ENSG00000168393/ENSG00000135318/ENSG00000198805/ENSG00000179958/ENSG00000197586/ENSG00000148229/ENSG00000014138/ENSG00000146143/ENSG00000068654/ENSG00000144231/ENSG00000162368/ENSG00000100479…	CTPS1/RRM2/UCK2/TK1/POLE/CAD/DCK/POLD1/POLD3/RRM1/POLA1/TYMS/NME1/DTYMK/NT5E/PNP/DCTPP1/ENTPD6/POLE3/POLA2/PRIM2/POLR1A/POLR2D/CMPK1/POLE2/POLR3H/POLR3K/NT5C3A/POLR3D/PNPT1/POLR1E/POLD2/POLR1B/ENPP1/UMPS/DUT/DCTD/PRIM1/POLR1C/POLR3C/ENTPD5/POLR3G/DHODH/POLR3B/TWISTNB/POLR3F/NME2/UCKL1/UPP1/POLR3E/POLR2G/NT5C/ENTPD4/POLR2C/POLR2L/POLE4/POLR2K	hsa:1503/hsa:6241/hsa:7371/hsa:7083/hsa:5426/hsa:790/hsa:1633/hsa:5424/hsa:10714/hsa:6240/hsa:5422/hsa:7298/hsa:4830/hsa:1841/hsa:4907/hsa:4860/hsa:79077/hsa:955/hsa:54107/hsa:23649/hsa:5558/hsa:25885/hsa:5433/hsa:51727/hsa:5427/hsa:171568/hsa:51728/hsa:51251/hsa:661/hsa:87178/hsa:64425/hsa:5425/hsa:84172/hsa:5167/hsa:7372/hsa:1854/hsa:1635/hsa:5557/hsa:9533/hsa:10623/hsa:957/hsa:10622/hsa:1723/h…	57
hsa03460	Fanconi anemia pathway	36/1739	53/5721	1.74114e-08	7.661e-07	ENSG00000136492/ENSG00000162607/ENSG00000140525/ENSG00000187741/ENSG00000012048/ENSG00000139618/ENSG00000221829/ENSG00000197299/ENSG00000117748/ENSG00000185504/ENSG00000144554/ENSG00000177302/ENSG00000175054/ENSG00000077152/ENSG00000154920/ENSG00000181544/ENSG00000100726/ENSG00000112039/ENSG00000178966/ENSG00000132383/ENSG00000172732/ENSG00000187790/ENSG00000164053/ENSG00000115392/ENSG00000135945…	BRIP1/USP1/FANCI/FANCA/BRCA1/BRCA2/FANCG/BLM/RPA2/FAAP100/FANCD2/TOP3A/ATR/UBE2T/EME1/FANCB/TELO2/FANCE/RMI1/RPA1/MUS81/FANCM/ATRIP/FANCL/REV1/FANCC/SLX4/PALB2/MLH1/RMI2/FAAP24/RPA3/CENPX/ERCC1/POLK/CENPS	hsa:83990/hsa:7398/hsa:55215/hsa:2175/hsa:672/hsa:675/hsa:2189/hsa:641/hsa:6118/hsa:80233/hsa:2177/hsa:7156/hsa:545/hsa:29089/hsa:146956/hsa:2187/hsa:9894/hsa:2178/hsa:80010/hsa:6117/hsa:80198/hsa:57697/hsa:84126/hsa:55120/hsa:51455/hsa:2176/hsa:84464/hsa:79728/hsa:4292/hsa:116028/hsa:91442/hsa:6119/hsa:201254/hsa:2067/hsa:51426/hsa:378708	36
hsa03420	Nucleotide excision repair	28/1739	42/5721	1.25393e-06	4.82763e-05	ENSG00000177084/ENSG00000133119/ENSG00000132646/ENSG00000163918/ENSG00000062822/ENSG00000049541/ENSG00000077514/ENSG00000117748/ENSG00000119318/ENSG00000104884/ENSG00000148229/ENSG00000105486/ENSG00000100479/ENSG00000111445/ENSG00000139842/ENSG00000132383/ENSG00000106628/ENSG00000134480/ENSG00000183474/ENSG00000179262/ENSG00000111358/ENSG00000020426/ENSG00000106399/ENSG00000100387/ENSG00000012061…	POLE/RFC3/PCNA/RFC4/POLD1/RFC2/POLD3/RPA2/RAD23B/ERCC2/POLE3/LIG1/POLE2/RFC5/CUL4A/RPA1/POLD2/CCNH/GTF2H2C/RAD23A/GTF2H3/MNAT1/RPA3/RBX1/ERCC1/ERCC8/GTF2H1/POLE4	hsa:5426/hsa:5983/hsa:5111/hsa:5984/hsa:5424/hsa:5982/hsa:10714/hsa:6118/hsa:5887/hsa:2068/hsa:54107/hsa:3978/hsa:5427/hsa:5985/hsa:8451/hsa:6117/hsa:5425/hsa:902/hsa:730394/hsa:5886/hsa:2967/hsa:4331/hsa:6119/hsa:9978/hsa:2067/hsa:1161/hsa:2965/hsa:56655	28
hsa04218	Cellular senescence	70/1739	143/5721	1.94428e-06	6.65377e-05	ENSG00000101412/ENSG00000145386/ENSG00000092969/ENSG00000143933/ENSG00000170312/ENSG00000134057/ENSG00000133818/ENSG00000099860/ENSG00000034152/ENSG00000101057/ENSG00000112576/ENSG00000198668/ENSG00000110092/ENSG00000157456/ENSG00000164045/ENSG00000123374/ENSG00000106366/ENSG00000111206/ENSG00000080839/ENSG00000105810/ENSG00000139687/ENSG00000175054/ENSG00000113456/ENSG00000078668/ENSG00000188130…	E2F1/CCNA2/TGFB2/CALM2/CDK1/CCNB1/RRAS2/GADD45B/MAP2K3/MYBL2/CCND3/CALM1/CCND1/CCNB2/CDC25A/CDK2/SERPINE1/FOXM1/RBL1/CDK6/RB1/ATR/RAD1/VDAC3/MAPK12/RHEB/TGFBR1/E2F2/E2F4/MAPK1/CCNE2/CCNE1/LIN9/NRAS/HRAS/SLC25A5/MYC/PPP3R1/EIF4EBP1/LIN54/NBN/LIN52/MRAS/MRE11/VDAC2/MAPK14/E2F3/ITPR3/KRAS/PPP1CC/CAPN2/RAF1/CHEK1/PIK3CB/CHEK2/MAPKAPK2/PPP1CA/PIK3CD/TRPM7/RAD9A/CALM3/AKT1/GADD45A/RAD9B/HUS1/SIRT1/MTOR…	hsa:1869/hsa:890/hsa:7042/hsa:805/hsa:983/hsa:891/hsa:22800/hsa:4616/hsa:5606/hsa:4605/hsa:896/hsa:801/hsa:595/hsa:9133/hsa:993/hsa:1017/hsa:5054/hsa:2305/hsa:5933/hsa:1021/hsa:5925/hsa:545/hsa:5810/hsa:7419/hsa:6300/hsa:6009/hsa:7046/hsa:1870/hsa:1874/hsa:5594/hsa:9134/hsa:898/hsa:286826/hsa:4893/hsa:3265/hsa:292/hsa:4609/hsa:5534/hsa:1978/hsa:132660/hsa:4683/hsa:91750/hsa:22808/hsa:4361/hsa:741…	70
hsa04114	Oocyte meiosis	56/1739	110/5721	4.54979e-06	0.000140133	ENSG00000117399/ENSG00000127564/ENSG00000143933/ENSG00000170312/ENSG00000134057/ENSG00000166851/ENSG00000169679/ENSG00000087586/ENSG00000128245/ENSG00000135476/ENSG00000112029/ENSG00000198668/ENSG00000157456/ENSG00000164109/ENSG00000123374/ENSG00000072501/ENSG00000164611/ENSG00000145349/ENSG00000113575/ENSG00000164924/ENSG00000196510/ENSG00000129810/ENSG00000188130/ENSG00000108055/ENSG00000100030…	CDC20/PKMYT1/CALM2/CDK1/CCNB1/PLK1/BUB1/AURKA/YWHAH/ESPL1/FBXO5/CALM1/CCNB2/MAD2L1/CDK2/SMC1A/PTTG1/CAMK2D/PPP2CA/YWHAZ/ANAPC7/SGO1/MAPK12/SMC3/MAPK1/PPP2CB/CDC25C/CCNE2/CCNE1/CUL1/FBXO43/YWHAG/YWHAE/PPP3R1/CDC27/RPS6KA6/PPP2R1B/CDC23/YWHAB/CPEB2/SLK/CDC16/ANAPC1/ITPR3/PPP1CC/ANAPC4/PRKACB/PPP1CA/ADCY9/PPP2R5E/CALM3/SPDYE3/RBX1/ANAPC5/SPDYE2/ANAPC13	hsa:991/hsa:9088/hsa:805/hsa:983/hsa:891/hsa:5347/hsa:699/hsa:6790/hsa:7533/hsa:9700/hsa:26271/hsa:801/hsa:9133/hsa:4085/hsa:1017/hsa:8243/hsa:9232/hsa:817/hsa:5515/hsa:7534/hsa:51434/hsa:151648/hsa:6300/hsa:9126/hsa:5594/hsa:5516/hsa:995/hsa:9134/hsa:898/hsa:8454/hsa:286151/hsa:7532/hsa:7531/hsa:5534/hsa:996/hsa:27330/hsa:5519/hsa:8697/hsa:7529/hsa:132864/hsa:9748/hsa:8881/hsa:64682/hsa:3710/hsa…	56
hsa03410	Base excision repair	22/1739	33/5721	1.78334e-05	0.000499334	ENSG00000168496/ENSG00000177084/ENSG00000132646/ENSG00000062822/ENSG00000077514/ENSG00000109674/ENSG00000143799/ENSG00000148229/ENSG00000105486/ENSG00000189403/ENSG00000100479/ENSG00000005156/ENSG00000106628/ENSG00000129484/ENSG00000169188/ENSG00000076248/ENSG00000129071/ENSG00000065057/ENSG00000139372/ENSG00000132781/ENSG00000154328/ENSG00000115350	FEN1/POLE/PCNA/POLD1/POLD3/NEIL3/PARP1/POLE3/LIG1/HMGB1/POLE2/LIG3/POLD2/PARP2/APEX2/UNG/MBD4/NTHL1/TDG/MUTYH/NEIL2/POLE4	hsa:2237/hsa:5426/hsa:5111/hsa:5424/hsa:10714/hsa:55247/hsa:142/hsa:54107/hsa:3978/hsa:3146/hsa:5427/hsa:3980/hsa:5425/hsa:10038/hsa:27301/hsa:7374/hsa:8930/hsa:4913/hsa:6996/hsa:4595/hsa:252969/hsa:56655	22
hsa03430	Mismatch repair	16/1739	22/5721	5.1171e-05	0.00131339	ENSG00000133119/ENSG00000174371/ENSG00000132646/ENSG00000163918/ENSG00000062822/ENSG00000049541/ENSG00000077514/ENSG00000116062/ENSG00000117748/ENSG00000095002/ENSG00000105486/ENSG00000111445/ENSG00000132383/ENSG00000106628/ENSG00000076242/ENSG00000106399	RFC3/EXO1/PCNA/RFC4/POLD1/RFC2/POLD3/MSH6/RPA2/MSH2/LIG1/RFC5/RPA1/POLD2/MLH1/RPA3	hsa:5983/hsa:9156/hsa:5111/hsa:5984/hsa:5424/hsa:5982/hsa:10714/hsa:2956/hsa:6118/hsa:4436/hsa:3978/hsa:5985/hsa:6117/hsa:5425/hsa:4292/hsa:6119	16
hsa03440	Homologous recombination	24/1739	40/5721	9.55709e-05	0.0022643	ENSG00000136492/ENSG00000012048/ENSG00000085999/ENSG00000138376/ENSG00000196584/ENSG00000062822/ENSG00000139618/ENSG00000077514/ENSG00000197299/ENSG00000101773/ENSG00000163781/ENSG00000117748/ENSG00000177302/ENSG00000185379/ENSG00000154920/ENSG00000126215/ENSG00000132383/ENSG00000106628/ENSG00000172732/ENSG00000087206/ENSG00000104320/ENSG00000020922/ENSG00000083093/ENSG00000106399	BRIP1/BRCA1/RAD54L/BARD1/XRCC2/POLD1/BRCA2/POLD3/BLM/RBBP8/TOPBP1/RPA2/TOP3A/RAD51D/EME1/XRCC3/RPA1/POLD2/MUS81/UIMC1/NBN/MRE11/PALB2/RPA3	hsa:83990/hsa:672/hsa:8438/hsa:580/hsa:7516/hsa:5424/hsa:675/hsa:10714/hsa:641/hsa:5932/hsa:11073/hsa:6118/hsa:7156/hsa:5892/hsa:146956/hsa:7517/hsa:6117/hsa:5425/hsa:80198/hsa:51720/hsa:4683/hsa:4361/hsa:79728/hsa:6119	24
hsa04914	Progesterone-mediated oocyte maturation	43/1739	87/5721	0.000139519	0.00306941	ENSG00000127564/ENSG00000145386/ENSG00000170312/ENSG00000134057/ENSG00000166851/ENSG00000169679/ENSG00000087586/ENSG00000157456/ENSG00000164045/ENSG00000164109/ENSG00000123374/ENSG00000079616/ENSG00000107643/ENSG00000196510/ENSG00000002822/ENSG00000188130/ENSG00000100030/ENSG00000072786/ENSG00000158402/ENSG00000065135/ENSG00000050748/ENSG00000080824/ENSG00000004897/ENSG00000072133/ENSG00000094880…	PKMYT1/CCNA2/CDK1/CCNB1/PLK1/BUB1/AURKA/CCNB2/CDC25A/MAD2L1/CDK2/KIF22/MAPK8/ANAPC7/MAD1L1/MAPK12/MAPK1/STK10/CDC25C/GNAI3/MAPK9/HSP90AA1/CDC27/RPS6KA6/CDC23/CPEB2/MAPK14/CDC16/ANAPC1/KRAS/RAF1/ANAPC4/PIK3CB/PRKACB/PIK3CD/ADCY9/SPDYE3/AKT1/HSP90AB1/ANAPC5/SPDYE2/ANAPC13/PIK3CA	hsa:9088/hsa:890/hsa:983/hsa:891/hsa:5347/hsa:699/hsa:6790/hsa:9133/hsa:993/hsa:4085/hsa:1017/hsa:3835/hsa:5599/hsa:51434/hsa:8379/hsa:6300/hsa:5594/hsa:6793/hsa:995/hsa:2773/hsa:5601/hsa:3320/hsa:996/hsa:27330/hsa:8697/hsa:132864/hsa:1432/hsa:8881/hsa:64682/hsa:3845/hsa:5894/hsa:29945/hsa:5291/hsa:5567/hsa:5293/hsa:115/hsa:441272/hsa:207/hsa:3326/hsa:51433/hsa:441273/hsa:25847/hsa:5290	43
hsa03015	mRNA surveillance pathway	41/1739	85/5721	0.000383761	0.00787988	ENSG00000183684/ENSG00000103342/ENSG00000071626/ENSG00000113575/ENSG00000205937/ENSG00000132661/ENSG00000100941/ENSG00000141543/ENSG00000120705/ENSG00000104695/ENSG00000136937/ENSG00000101104/ENSG00000111605/ENSG00000111196/ENSG00000145216/ENSG00000167393/ENSG00000111880/ENSG00000221914/ENSG00000101811/ENSG00000133226/ENSG00000167005/ENSG00000137713/ENSG00000162385/ENSG00000186298/ENSG00000119203…	ALYREF/GSPT1/DAZAP1/PPP2CA/RNPS1/NXT1/PNN/EIF4A3/ETF1/PPP2CB/NCBP1/PABPC1L/CPSF6/MAGOHB/FIP1L1/PPP2R3B/RNGTT/PPP2R2A/CSTF2/SRRM1/NUDT21/PPP2R1B/MAGOH/PPP1CC/CPSF3/PPP1CA/CPSF7/PPP2R2D/UPF3A/SMG1/NXF1/HBS1L/SSU72/PPP2R5E/CPSF2/PCF11/PPP2R3A/CSTF2T/PYM1/PELO/SMG5	hsa:10189/hsa:2935/hsa:26528/hsa:5515/hsa:10921/hsa:29107/hsa:5411/hsa:9775/hsa:2107/hsa:5516/hsa:4686/hsa:80336/hsa:11052/hsa:55110/hsa:81608/hsa:28227/hsa:8732/hsa:5520/hsa:1478/hsa:10250/hsa:11051/hsa:5519/hsa:4116/hsa:5501/hsa:51692/hsa:5499/hsa:79869/hsa:55844/hsa:65110/hsa:23049/hsa:10482/hsa:10767/hsa:29101/hsa:5529/hsa:53981/hsa:51585/hsa:5523/hsa:23283/hsa:84305/hsa:53918/hsa:23381	41
hsa00230	Purine metabolism	67/1739	155/5721	0.000418887	0.00806357	ENSG00000171848/ENSG00000177084/ENSG00000147224/ENSG00000156136/ENSG00000062822/ENSG00000077514/ENSG00000167325/ENSG00000163655/ENSG00000101868/ENSG00000239672/ENSG00000106348/ENSG00000178921/ENSG00000135318/ENSG00000198805/ENSG00000197586/ENSG00000128059/ENSG00000148229/ENSG00000014138/ENSG00000146143/ENSG00000068654/ENSG00000198682/ENSG00000144231/ENSG00000100479/ENSG00000165704/ENSG00000100413…	RRM2/POLE/PRPS1/DCK/POLD1/POLD3/RRM1/GMPS/POLA1/NME1/IMPDH1/PFAS/NT5E/PNP/ENTPD6/PPAT/POLE3/POLA2/PRIM2/POLR1A/PAPSS2/POLR2D/POLE2/HPRT1/POLR3H/AK5/POLR3K/NT5C3A/POLR3D/PNPT1/POLR1E/POLD2/POLR1B/ATIC/ENPP1/ADSS/PRIM1/PAICS/POLR1C/ADK/POLR3C/ENTPD5/ADSL/POLR3G/PDE7A/PGM2/POLR3B/ITPA/PDE6D/TWISTNB/POLR3F/DGUOK/NME2/NUDT16/POLR3E/ADCY9/PRPS2/POLR2G/IMPDH2/NT5C/ENTPD4/XDH/PDE8A/POLR2C/POLR2L/POLE4/PO…	hsa:6241/hsa:5426/hsa:5631/hsa:1633/hsa:5424/hsa:10714/hsa:6240/hsa:8833/hsa:5422/hsa:4830/hsa:3614/hsa:5198/hsa:4907/hsa:4860/hsa:955/hsa:5471/hsa:54107/hsa:23649/hsa:5558/hsa:25885/hsa:9060/hsa:5433/hsa:5427/hsa:3251/hsa:171568/hsa:26289/hsa:51728/hsa:51251/hsa:661/hsa:87178/hsa:64425/hsa:5425/hsa:84172/hsa:471/hsa:5167/hsa:159/hsa:5557/hsa:10606/hsa:9533/hsa:132/hsa:10623/hsa:957/hsa:158/hsa:1…	67
hsa00900	Terpenoid backbone biosynthesis	14/1739	21/5721	0.000642397	0.0116387	ENSG00000116237/ENSG00000120437/ENSG00000110921/ENSG00000084073/ENSG00000148459/ENSG00000167508/ENSG00000117682/ENSG00000067064/ENSG00000163344/ENSG00000113161/ENSG00000160752/ENSG00000173653/ENSG00000153989/ENSG00000112972	ICMT/ACAT2/MVK/ZMPSTE24/PDSS1/MVD/DHDDS/IDI1/PMVK/HMGCR/FDPS/RCE1/NUS1/HMGCS1	hsa:23463/hsa:39/hsa:4598/hsa:10269/hsa:23590/hsa:4597/hsa:79947/hsa:3422/hsa:10654/hsa:3156/hsa:2224/hsa:9986/hsa:116150/hsa:3157	14
hsa03020	RNA polymerase	18/1739	30/5721	0.00072268	0.0123659	ENSG00000068654/ENSG00000144231/ENSG00000100413/ENSG00000161980/ENSG00000168495/ENSG00000137054/ENSG00000125630/ENSG00000171453/ENSG00000186141/ENSG00000113356/ENSG00000013503/ENSG00000105849/ENSG00000132664/ENSG00000058600/ENSG00000168002/ENSG00000102978/ENSG00000177700/ENSG00000147669	POLR1A/POLR2D/POLR3H/POLR3K/POLR3D/POLR1E/POLR1B/POLR1C/POLR3C/POLR3G/POLR3B/TWISTNB/POLR3F/POLR3E/POLR2G/POLR2C/POLR2L/POLR2K	hsa:25885/hsa:5433/hsa:171568/hsa:51728/hsa:661/hsa:64425/hsa:84172/hsa:9533/hsa:10623/hsa:10622/hsa:55703/hsa:221830/hsa:10621/hsa:55718/hsa:5436/hsa:5432/hsa:5441/hsa:5440	18
hsa05100	Bacterial invasion of epithelial cells	33/1739	67/5721	0.00087832	0.014238	ENSG00000075624/ENSG00000184009/ENSG00000035403/ENSG00000162704/ENSG00000138758/ENSG00000105976/ENSG00000105971/ENSG00000167193/ENSG00000071205/ENSG00000163466/ENSG00000175416/ENSG00000136950/ENSG00000241553/ENSG00000067560/ENSG00000089159/ENSG00000136238/ENSG00000161638/ENSG00000110395/ENSG00000177105/ENSG00000164402/ENSG00000122705/ENSG00000198087/ENSG00000051382/ENSG00000171608/ENSG00000062598…	ACTB/ACTG1/VCL/ARPC5/SEPT11/MET/CAV2/CRK/ARHGAP10/ARPC2/CLTB/ARPC5L/ARPC4/RHOA/PXN/RAC1/ITGA5/CBL/RHOG/SEPT8/CLTA/CD2AP/PIK3CB/PIK3CD/ELMO2/SEPT2/ARPC1A/FN1/CTNNA1/CLTC/CTTN/ILK/PIK3CA	hsa:60/hsa:71/hsa:7414/hsa:10092/hsa:55752/hsa:4233/hsa:858/hsa:1398/hsa:79658/hsa:10109/hsa:1212/hsa:81873/hsa:10093/hsa:387/hsa:5829/hsa:5879/hsa:3678/hsa:867/hsa:391/hsa:23176/hsa:1211/hsa:23607/hsa:5291/hsa:5293/hsa:63916/hsa:4735/hsa:10552/hsa:2335/hsa:1495/hsa:1213/hsa:2017/hsa:3611/hsa:5290	33
hsa04392	Hippo signaling pathway - multiple species	16/1739	26/5721	0.000972304	0.0149735	ENSG00000142279/ENSG00000129474/ENSG00000068028/ENSG00000197905/ENSG00000186575/ENSG00000149269/ENSG00000139926/ENSG00000196159/ENSG00000150457/ENSG00000007866/ENSG00000187079/ENSG00000173542/ENSG00000114978/ENSG00000104375/ENSG00000131023/ENSG00000144791	WTIP/AJUBA/RASSF1/TEAD4/NF2/PAK1/FRMD6/FAT4/LATS2/TEAD3/TEAD1/MOB1B/MOB1A/STK3/LATS1/LIMD1	hsa:126374/hsa:84962/hsa:11186/hsa:7004/hsa:4771/hsa:5058/hsa:122786/hsa:79633/hsa:26524/hsa:7005/hsa:7003/hsa:92597/hsa:55233/hsa:6788/hsa:9113/hsa:8994	16
hsa04120	Ubiquitin mediated proteolysis	57/1739	132/5721	0.00113274	0.0166135	ENSG00000117399/ENSG00000108106/ENSG00000175063/ENSG00000108854/ENSG00000148634/ENSG00000012048/ENSG00000145604/ENSG00000142230/ENSG00000177889/ENSG00000196510/ENSG00000184787/ENSG00000078140/ENSG00000009335/ENSG00000126261/ENSG00000139842/ENSG00000198833/ENSG00000055130/ENSG00000110107/ENSG00000119401/ENSG00000160087/ENSG00000115760/ENSG00000138641/ENSG00000049759/ENSG00000004897/ENSG00000077721…	CDC20/UBE2S/UBE2C/SMURF2/HERC4/BRCA1/SKP2/SAE1/UBE2N/ANAPC7/UBE2G2/UBE2K/UBE3C/UBA2/CUL4A/UBE2J1/CUL1/PRPF19/TRIM32/UBE2J2/BIRC6/HERC3/NEDD4L/CDC27/UBE2A/UBE2D2/UBE2F/FANCL/CDC23/CBL/UBE2G1/FBXO4/CDC16/ANAPC1/ELOC/UBE2M/ANAPC4/SOCS3/FBXW8/RHOBTB2/HERC1/CUL2/UBE3A/RBX1/CDC34/PIAS4/UBE2L3/SMURF1/ANAPC5/UBA6/ERCC8/ANAPC13/KLHL9/UBE2Q1/PIAS3/SYVN1/NEDD4	hsa:991/hsa:27338/hsa:11065/hsa:64750/hsa:26091/hsa:672/hsa:6502/hsa:10055/hsa:7334/hsa:51434/hsa:7327/hsa:3093/hsa:9690/hsa:10054/hsa:8451/hsa:51465/hsa:8454/hsa:27339/hsa:22954/hsa:118424/hsa:57448/hsa:8916/hsa:23327/hsa:996/hsa:7319/hsa:7322/hsa:140739/hsa:55120/hsa:8697/hsa:867/hsa:7326/hsa:26272/hsa:8881/hsa:64682/hsa:6921/hsa:9040/hsa:29945/hsa:9021/hsa:26259/hsa:23221/hsa:8925/hsa:8453/hsa…	57

## Sheet: Casp_treated.up_KEGGenrich_
KEGGID	Description	GeneRatio	BgRatio	pvalue	padj	geneID	geneName	keggID	Count
hsa04142	Lysosome	62/1805	118/5721	1.42075e-06	0.00043901	ENSG00000078081/ENSG00000166340/ENSG00000049860/ENSG00000197746/ENSG00000105612/ENSG00000010404/ENSG00000166311/ENSG00000109323/ENSG00000196743/ENSG00000135677/ENSG00000164733/ENSG00000138760/ENSG00000170266/ENSG00000256043/ENSG00000102575/ENSG00000071553/ENSG00000104763/ENSG00000185896/ENSG00000101160/ENSG00000005893/ENSG00000197081/ENSG00000104341/ENSG00000181523/ENSG00000119655/ENSG00000213983…	LAMP3/TPP1/HEXB/PSAP/DNASE2/IDS/SMPD1/MANBA/GM2A/GNS/CTSB/SCARB2/GLB1/CTSO/ACP5/ATP6AP1/ASAH1/LAMP1/CTSZ/LAMP2/IGF2R/LAPTM4B/SGSH/NPC2/AP1G2/AP1M2/ABCA2/CTSS/CTSL/NPC1/FUCA1/CTSD/GALC/SUMF1/CTSF/ARSG/LAPTM4A/MCOLN1/GNPTG/NAGPA/ATP6V0A1/HEXA/ATP6V0D2/LGMN/CD63/LAPTM5/ABCB9/AP3S2/CLN5/CTSA/ACP2/GLA/CD164/GALNS/NAGLU/GGA2/SLC17A5/NAPSA/MAN2B1/SLC11A2/GNPTAB/CTSH	hsa:27074/hsa:1200/hsa:3074/hsa:5660/hsa:1777/hsa:3423/hsa:6609/hsa:4126/hsa:2760/hsa:2799/hsa:1508/hsa:950/hsa:2720/hsa:1519/hsa:54/hsa:537/hsa:427/hsa:3916/hsa:1522/hsa:3920/hsa:3482/hsa:55353/hsa:6448/hsa:10577/hsa:8906/hsa:10053/hsa:20/hsa:1520/hsa:1514/hsa:4864/hsa:2517/hsa:1509/hsa:2581/hsa:285362/hsa:8722/hsa:22901/hsa:9741/hsa:57192/hsa:84572/hsa:51172/hsa:535/hsa:3073/hsa:245972/hsa:5641…	62
hsa02010	ABC transporters	23/1805	33/5721	7.24168e-06	0.00111884	ENSG00000165029/ENSG00000064687/ENSG00000167972/ENSG00000108846/ENSG00000103222/ENSG00000107331/ENSG00000141338/ENSG00000125257/ENSG00000118777/ENSG00000101986/ENSG00000144452/ENSG00000131269/ENSG00000150967/ENSG00000119688/ENSG00000154262/ENSG00000154265/ENSG00000160179/ENSG00000115657/ENSG00000172350/ENSG00000198691/ENSG00000023839/ENSG00000154258/ENSG00000005471	ABCA1/ABCA7/ABCA3/ABCC3/ABCC1/ABCA2/ABCA8/ABCC4/ABCG2/ABCD1/ABCA12/ABCB7/ABCB9/ABCD4/ABCA6/ABCA5/ABCG1/ABCB6/ABCG4/ABCA4/ABCC2/ABCA9/ABCB4	hsa:19/hsa:10347/hsa:21/hsa:8714/hsa:4363/hsa:20/hsa:10351/hsa:10257/hsa:9429/hsa:215/hsa:26154/hsa:22/hsa:23457/hsa:5826/hsa:23460/hsa:23461/hsa:9619/hsa:10058/hsa:64137/hsa:24/hsa:1244/hsa:10350/hsa:5244	23
hsa04657	IL-17 signaling pathway	41/1805	80/5721	0.000176856	0.0182162	ENSG00000163739/ENSG00000100906/ENSG00000169429/ENSG00000172216/ENSG00000108691/ENSG00000118503/ENSG00000196611/ENSG00000124875/ENSG00000102871/ENSG00000163702/ENSG00000130522/ENSG00000081041/ENSG00000056972/ENSG00000125538/ENSG00000124391/ENSG00000055208/ENSG00000136244/ENSG00000163735/ENSG00000163220/ENSG00000156711/ENSG00000166598/ENSG00000169245/ENSG00000143546/ENSG00000163734/ENSG00000137745…	CXCL1/NFKBIA/CXCL8/CEBPB/CCL2/TNFAIP3/MMP1/CXCL6/TRADD/IL17RC/JUND/CXCL2/TRAF3IP2/IL1B/IL17C/TAB2/IL6/CXCL5/S100A9/MAPK13/HSP90B1/CXCL10/S100A8/CXCL3/MMP13/MAPK3/LCN2/CCL7/MUC5B/MMP3/CASP8/CSF3/CCL20/MAPK6/MAPK10/S100A7/TBK1/FOS/MAPK11/CSF2/IL17RB	hsa:2919/hsa:4792/hsa:3576/hsa:1051/hsa:6347/hsa:7128/hsa:4312/hsa:6372/hsa:8717/hsa:84818/hsa:3727/hsa:2920/hsa:10758/hsa:3553/hsa:27189/hsa:23118/hsa:3569/hsa:6374/hsa:6280/hsa:5603/hsa:7184/hsa:3627/hsa:6279/hsa:2921/hsa:4322/hsa:5595/hsa:3934/hsa:6354/hsa:727897/hsa:4314/hsa:841/hsa:1440/hsa:6364/hsa:5597/hsa:5602/hsa:6278/hsa:29110/hsa:2353/hsa:5600/hsa:1437/hsa:55540	41
hsa05165	Human papillomavirus infection	120/1805	295/5721	0.000422941	0.0286652	ENSG00000112715/ENSG00000171862/ENSG00000164683/ENSG00000135679/ENSG00000196878/ENSG00000118971/ENSG00000074181/ENSG00000124762/ENSG00000137809/ENSG00000113721/ENSG00000170581/ENSG00000066027/ENSG00000125347/ENSG00000053747/ENSG00000118785/ENSG00000196782/ENSG00000102871/ENSG00000108840/ENSG00000171522/ENSG00000082781/ENSG00000091136/ENSG00000132470/ENSG00000163359/ENSG00000114315/ENSG00000124171…	VEGFA/PTEN/HEY1/MDM2/LAMB3/CCND2/NOTCH3/CDKN1A/ITGA11/PDGFRB/STAT2/PPP2R5A/IRF1/LAMA3/SPP1/MAML3/TRADD/HDAC5/PTGER4/ITGB5/LAMB1/ITGB4/COL6A3/HES1/PARD6B/DLG3/PIK3R1/ATP6AP1/JAK1/LAMA5/MAML2/RBPJ/LAMC2/LFNG/HDAC11/LLGL2/TNFRSF1A/TSC2/TP53/PKM/MX1/COL9A2/LAMA2/TCF7/PARD6G/MAPK3/BCAP31/RBL2/EP300/PPP2R2C/CSNK1A1/CREB3L4/OASL/HDAC9/WNT7B/ITGB6/HDAC6/FOXO1/ITGB3/ITGA2/DVL2/COL4A5/THBS2/ITGA1/CRB3/ATP6…	hsa:7422/hsa:5728/hsa:23462/hsa:4193/hsa:3914/hsa:894/hsa:4854/hsa:1026/hsa:22801/hsa:5159/hsa:6773/hsa:5525/hsa:3659/hsa:3909/hsa:6696/hsa:55534/hsa:8717/hsa:10014/hsa:5734/hsa:3693/hsa:3912/hsa:3691/hsa:1293/hsa:3280/hsa:84612/hsa:1741/hsa:5295/hsa:537/hsa:3716/hsa:3911/hsa:84441/hsa:3516/hsa:3918/hsa:3955/hsa:79885/hsa:3993/hsa:7132/hsa:7249/hsa:7157/hsa:5315/hsa:4599/hsa:1298/hsa:3908/hsa:693…	120
hsa05144	Malaria	21/1805	35/5721	0.000463838	0.0286652	ENSG00000105329/ENSG00000169429/ENSG00000090339/ENSG00000108691/ENSG00000136732/ENSG00000125538/ENSG00000136244/ENSG00000169439/ENSG00000135218/ENSG00000136869/ENSG00000119699/ENSG00000019991/ENSG00000186340/ENSG00000172936/ENSG00000169231/ENSG00000110651/ENSG00000101017/ENSG00000108342/ENSG00000162692/ENSG00000113296/ENSG00000137462	TGFB1/CXCL8/ICAM1/CCL2/GYPC/IL1B/IL6/SDC2/CD36/TLR4/TGFB3/HGF/THBS2/MYD88/THBS3/CD81/CD40/CSF3/VCAM1/THBS4/TLR2	hsa:7040/hsa:3576/hsa:3383/hsa:6347/hsa:2995/hsa:3553/hsa:3569/hsa:6383/hsa:948/hsa:7099/hsa:7043/hsa:3082/hsa:7058/hsa:4615/hsa:7059/hsa:975/hsa:958/hsa:1440/hsa:7412/hsa:7060/hsa:7097	21
hsa05323	Rheumatoid arthritis	32/1805	62/5721	0.000758723	0.0375034	ENSG00000105329/ENSG00000163739/ENSG00000169429/ENSG00000090339/ENSG00000112715/ENSG00000108691/ENSG00000107562/ENSG00000196611/ENSG00000124875/ENSG00000125538/ENSG00000102575/ENSG00000071553/ENSG00000136244/ENSG00000163735/ENSG00000135047/ENSG00000115008/ENSG00000136869/ENSG00000119699/ENSG00000149968/ENSG00000033627/ENSG00000147614/ENSG00000102524/ENSG00000128524/ENSG00000113732/ENSG00000115009…	TGFB1/CXCL1/CXCL8/ICAM1/VEGFA/CCL2/CXCL12/MMP1/CXCL6/IL1B/ACP5/ATP6AP1/IL6/CXCL5/CTSL/IL1A/TLR4/TGFB3/MMP3/ATP6V0A1/ATP6V0D2/TNFSF13B/ATP6V1F/ATP6V0E1/CCL20/FOS/TLR2/CSF2/ATP6V1E2/ATP6V1G1/TNFSF13/FLT1	hsa:7040/hsa:2919/hsa:3576/hsa:3383/hsa:7422/hsa:6347/hsa:6387/hsa:4312/hsa:6372/hsa:3553/hsa:54/hsa:537/hsa:3569/hsa:6374/hsa:1514/hsa:3552/hsa:7099/hsa:7043/hsa:4314/hsa:535/hsa:245972/hsa:10673/hsa:9296/hsa:8992/hsa:6364/hsa:2353/hsa:7097/hsa:1437/hsa:90423/hsa:9550/hsa:8741/hsa:2321	32
hsa04668	TNF signaling pathway	47/1805	101/5721	0.0010504	0.0375034	ENSG00000163739/ENSG00000100906/ENSG00000090339/ENSG00000171223/ENSG00000172216/ENSG00000108691/ENSG00000118503/ENSG00000128342/ENSG00000125347/ENSG00000069399/ENSG00000157227/ENSG00000102871/ENSG00000081041/ENSG00000125538/ENSG00000145675/ENSG00000055208/ENSG00000136244/ENSG00000163735/ENSG00000023445/ENSG00000056558/ENSG00000156711/ENSG00000169245/ENSG00000067182/ENSG00000163734/ENSG00000108984…	CXCL1/NFKBIA/ICAM1/JUNB/CEBPB/CCL2/TNFAIP3/LIF/IRF1/BCL3/MMP14/TRADD/CXCL2/IL1B/PIK3R1/TAB2/IL6/CXCL5/BIRC3/TRAF1/MAPK13/CXCL10/TNFRSF1A/CXCL3/MAP2K6/MAPK3/MAP3K8/CREB3L4/MMP3/CASP8/CCL20/MAPK10/CASP10/FAS/NOD2/CREB1/TAB1/VCAM1/FOS/CX3CL1/MAPK11/CSF2/RPS6KA5/MAP2K7/ATF4/RIPK3/JAG1	hsa:2919/hsa:4792/hsa:3383/hsa:3726/hsa:1051/hsa:6347/hsa:7128/hsa:3976/hsa:3659/hsa:602/hsa:4323/hsa:8717/hsa:2920/hsa:3553/hsa:5295/hsa:23118/hsa:3569/hsa:6374/hsa:330/hsa:7185/hsa:5603/hsa:3627/hsa:7132/hsa:2921/hsa:5608/hsa:5595/hsa:1326/hsa:148327/hsa:4314/hsa:841/hsa:6364/hsa:5602/hsa:843/hsa:355/hsa:64127/hsa:1385/hsa:10454/hsa:7412/hsa:2353/hsa:6376/hsa:5600/hsa:1437/hsa:9252/hsa:5609/hsa…	47
hsa00511	Other glycan degradation	11/1805	15/5721	0.00106644	0.0375034	ENSG00000049860/ENSG00000109323/ENSG00000170266/ENSG00000001036/ENSG00000169660/ENSG00000013288/ENSG00000179163/ENSG00000167280/ENSG00000213614/ENSG00000140400/ENSG00000104774	HEXB/MANBA/GLB1/FUCA2/HEXDC/MAN2B2/FUCA1/ENGASE/HEXA/MAN2C1/MAN2B1	hsa:3074/hsa:4126/hsa:2720/hsa:2519/hsa:284004/hsa:23324/hsa:2517/hsa:64772/hsa:3073/hsa:4123/hsa:4125	11
hsa04512	ECM-receptor interaction	36/1805	73/5721	0.00109233	0.0375034	ENSG00000196878/ENSG00000137809/ENSG00000053747/ENSG00000118785/ENSG00000082781/ENSG00000091136/ENSG00000132470/ENSG00000163359/ENSG00000130702/ENSG00000058085/ENSG00000049089/ENSG00000196569/ENSG00000135218/ENSG00000026508/ENSG00000115221/ENSG00000259207/ENSG00000164171/ENSG00000188153/ENSG00000186340/ENSG00000213949/ENSG00000169231/ENSG00000110799/ENSG00000172037/ENSG00000101680/ENSG00000196776…	LAMB3/ITGA11/LAMA3/SPP1/ITGB5/LAMB1/ITGB4/COL6A3/LAMA5/LAMC2/COL9A2/LAMA2/CD36/CD44/ITGB6/ITGB3/ITGA2/COL4A5/THBS2/ITGA1/THBS3/VWF/LAMB2/LAMA1/CD47/ITGA2B/SV2A/LAMB4/THBS4/LAMA4/ITGB8/CHAD/LAMC1/ITGA7/COL4A6/ITGB7	hsa:3914/hsa:22801/hsa:3909/hsa:6696/hsa:3693/hsa:3912/hsa:3691/hsa:1293/hsa:3911/hsa:3918/hsa:1298/hsa:3908/hsa:948/hsa:960/hsa:3694/hsa:3690/hsa:3673/hsa:1287/hsa:7058/hsa:3672/hsa:7059/hsa:7450/hsa:3913/hsa:284217/hsa:961/hsa:3674/hsa:9900/hsa:22798/hsa:7060/hsa:3910/hsa:3696/hsa:1101/hsa:3915/hsa:3679/hsa:1288/hsa:3695	36
hsa04216	Ferroptosis	21/1805	37/5721	0.00128104	0.0395842	ENSG00000100292/ENSG00000130066/ENSG00000115107/ENSG00000266412/ENSG00000167996/ENSG00000138449/ENSG00000087086/ENSG00000171867/ENSG00000138821/ENSG00000141504/ENSG00000167468/ENSG00000141510/ENSG00000001084/ENSG00000140941/ENSG00000111684/ENSG00000101460/ENSG00000168003/ENSG00000197142/ENSG00000161905/ENSG00000110911/ENSG00000091513	HMOX1/SAT1/STEAP3/NCOA4/FTH1/SLC40A1/FTL/PRNP/SLC39A8/SAT2/GPX4/TP53/GCLC/MAP1LC3B/LPCAT3/MAP1LC3A/SLC3A2/ACSL5/ALOX15/SLC11A2/TF	hsa:3162/hsa:6303/hsa:55240/hsa:8031/hsa:2495/hsa:30061/hsa:2512/hsa:5621/hsa:64116/hsa:112483/hsa:2879/hsa:7157/hsa:2729/hsa:81631/hsa:10162/hsa:84557/hsa:6520/hsa:51703/hsa:246/hsa:4891/hsa:7018	21
hsa04217	Necroptosis	57/1805	129/5721	0.00155705	0.043739	ENSG00000118503/ENSG00000120889/ENSG00000166888/ENSG00000170581/ENSG00000100504/ENSG00000161011/ENSG00000166311/ENSG00000102871/ENSG00000180573/ENSG00000167996/ENSG00000105639/ENSG00000135821/ENSG00000125538/ENSG00000087086/ENSG00000255112/ENSG00000168610/ENSG00000162434/ENSG00000023445/ENSG00000113648/ENSG00000105499/ENSG00000103490/ENSG00000067182/ENSG00000125826/ENSG00000100994/ENSG00000115008…	TNFAIP3/TNFRSF10B/STAT6/STAT2/PYGL/SQSTM1/SMPD1/TRADD/HIST1H2AC/FTH1/JAK3/GLUL/IL1B/FTL/CHMP1B/STAT3/JAK1/BIRC3/H2AFY/PLA2G4C/PYCARD/TNFRSF1A/RBCK1/PYGB/IL1A/TLR4/IFNGR1/H2AFJ/PARP4/USP21/BAX/XIAP/CYLD/CASP1/TNFSF10/HIST3H2A/CASP8/RNF31/IRF9/STAT5A/MAPK10/CHMP4B/EIF2AK2/FAS/PLA2G4F/HIST1H2AG/IFNAR1/CAMK2A/ALOX15/PARP3/RIPK3/SHARPIN/STAT4/CHMP5/CHMP4C/BID/HIST1H2AE	hsa:7128/hsa:8795/hsa:6778/hsa:6773/hsa:5836/hsa:8878/hsa:6609/hsa:8717/hsa:8334/hsa:2495/hsa:3718/hsa:2752/hsa:3553/hsa:2512/hsa:57132/hsa:6774/hsa:3716/hsa:330/hsa:9555/hsa:8605/hsa:29108/hsa:7132/hsa:10616/hsa:5834/hsa:3552/hsa:7099/hsa:3459/hsa:55766/hsa:143/hsa:27005/hsa:581/hsa:331/hsa:1540/hsa:834/hsa:8743/hsa:92815/hsa:841/hsa:55072/hsa:10379/hsa:6776/hsa:5602/hsa:128866/hsa:5610/hsa:355/…	57

## Sheet: Bio_treated.down_KEGGenrich
KEGGID	Description	GeneRatio	BgRatio	pvalue	padj	geneID	geneName	keggID	Count
hsa04110	Cell cycle	23/179	120/5489	2.75749e-12	6.0389e-10	ENSG00000135476/ENSG00000104738/ENSG00000156970/ENSG00000169679/ENSG00000076003/ENSG00000073111/ENSG00000112742/ENSG00000117399/ENSG00000085840/ENSG00000080839/ENSG00000100297/ENSG00000145386/ENSG00000166851/ENSG00000164045/ENSG00000112118/ENSG00000094804/ENSG00000101972/ENSG00000072501/ENSG00000157456/ENSG00000139687/ENSG00000166508/ENSG00000110092/ENSG00000101224	ESPL1/MCM4/BUB1B/BUB1/MCM6/MCM2/TTK/CDC20/ORC1/RBL1/MCM5/CCNA2/PLK1/CDC25A/MCM3/CDC6/STAG2/SMC1A/CCNB2/RB1/MCM7/CCND1/CDC25B	hsa:9700/hsa:4173/hsa:701/hsa:699/hsa:4175/hsa:4171/hsa:7272/hsa:991/hsa:4998/hsa:5933/hsa:4174/hsa:890/hsa:5347/hsa:993/hsa:4172/hsa:990/hsa:10735/hsa:8243/hsa:9133/hsa:5925/hsa:4176/hsa:595/hsa:994	23
hsa00100	Steroid biosynthesis	8/179	18/5489	3.62425e-08	3.96856e-06	ENSG00000104549/ENSG00000052802/ENSG00000172893/ENSG00000149809/ENSG00000132196/ENSG00000116133/ENSG00000057252/ENSG00000107798	SQLE/MSMO1/DHCR7/TM7SF2/HSD17B7/DHCR24/SOAT1/LIPA	hsa:6713/hsa:6307/hsa:1717/hsa:7108/hsa:51478/hsa:1718/hsa:6646/hsa:3988	8
hsa03030	DNA replication	9/179	35/5489	1.15875e-06	8.45884e-05	ENSG00000177084/ENSG00000104738/ENSG00000076003/ENSG00000073111/ENSG00000101868/ENSG00000100297/ENSG00000112118/ENSG00000166508/ENSG00000146143	POLE/MCM4/MCM6/MCM2/POLA1/MCM5/MCM3/MCM7/PRIM2	hsa:5426/hsa:4173/hsa:4175/hsa:4171/hsa:5422/hsa:4174/hsa:4172/hsa:4176/hsa:5558	9
hsa03440	Homologous recombination	9/179	40/5489	3.89728e-06	0.000213376	ENSG00000085999/ENSG00000136492/ENSG00000012048/ENSG00000138376/ENSG00000197299/ENSG00000139618/ENSG00000163781/ENSG00000196584/ENSG00000101773	RAD54L/BRIP1/BRCA1/BARD1/BLM/BRCA2/TOPBP1/XRCC2/RBBP8	hsa:8438/hsa:83990/hsa:672/hsa:580/hsa:641/hsa:675/hsa:11073/hsa:7516/hsa:5932	9
hsa03460	Fanconi anemia pathway	9/179	54/5489	5.11068e-05	0.00223848	ENSG00000187741/ENSG00000140525/ENSG00000136492/ENSG00000012048/ENSG00000144554/ENSG00000197299/ENSG00000139618/ENSG00000112039/ENSG00000221829	FANCA/FANCI/BRIP1/BRCA1/FANCD2/BLM/BRCA2/FANCE/FANCG	hsa:2175/hsa:55215/hsa:83990/hsa:672/hsa:2177/hsa:641/hsa:675/hsa:2178/hsa:2189	9
hsa00670	One carbon pool by folate	4/179	16/5489	0.00146322	0.0460751	ENSG00000100714/ENSG00000176974/ENSG00000228716/ENSG00000176890	MTHFD1/SHMT1/DHFR/TYMS	hsa:4522/hsa:6470/hsa:1719/hsa:7298	4
hsa04979	Cholesterol metabolism	6/179	39/5489	0.00147272	0.0460751	ENSG00000169174/ENSG00000144959/ENSG00000101670/ENSG00000130164/ENSG00000057252/ENSG00000107798	PCSK9/NCEH1/LIPG/LDLR/SOAT1/LIPA	hsa:255738/hsa:57552/hsa:9388/hsa:3949/hsa:6646/hsa:3988	6

## Sheet: Bio_treated.up_KEGGenrich_s
KEGGID	Description	GeneRatio	BgRatio	pvalue	padj	geneID	geneName	keggID	Count
hsa00480	Glutathione metabolism	10/316	44/5489	0.000148757	0.0403131	ENSG00000182054/ENSG00000099998/ENSG00000023909/ENSG00000170899/ENSG00000178814/ENSG00000104687/ENSG00000134202/ENSG00000100031/ENSG00000134201/ENSG00000167468	IDH2/GGT5/GCLM/GSTA4/OPLAH/GSR/GSTM3/GGT1/GSTM5/GPX4	hsa:3418/hsa:2687/hsa:2730/hsa:2941/hsa:26873/hsa:2936/hsa:2947/hsa:2678/hsa:2949/hsa:2879	10
